# Supplementary material
Source: MDPI journal article supplement (https://www.mdpi.com/2073-4441/10/10/1493)
Supplement: s1 [file s1]

---

# A multi-criteria assessment of water supply in Ugandan refugee settlements

Susanna Andreasi Bassi<sup>\*1</sup>, Iskandar Tange<sup>2</sup>, Benjamin Holm<sup>1</sup>, Alessio Boldrin<sup>1</sup>, Martin Rygaard<sup>1</sup>

## SUPPLEMENTARY MATERIAL A

*<sup>1</sup>Technical University of Denmark, Department of Environmental Engineering, Bygningstorvet, Building 115, 2800 Kgs. Lyngby, Denmark*

*<sup>2</sup>Technical University of Denmark, Department of Management Engineering, Bygningstorvet, Building 372, 2800 Kgs. Lyngby, Denmark*

*\*) Corresponding author: [suan@env.dtu.dk](mailto:suan@env.dtu.dk)*

---

## Contents

|                                                                                                                                  |           |
|----------------------------------------------------------------------------------------------------------------------------------|-----------|
| <b>CONTENTS</b>                                                                                                                  | <b>1</b>  |
| <b>SM A.1 UGANDAN GOVERNMENT GUIDELINES FOR BUILDING NEW WATER SUPPLY SYSTEMS IN REFUGEE SETTLEMENTS IN THE WEST NILE REGION</b> | <b>3</b>  |
| <b>SM A.2 STAKEHOLDER MAPPING AND SETTLEMENTS</b>                                                                                | <b>4</b>  |
| <b>SM A.3 LOCATION OF THE SETTLEMENTS</b>                                                                                        | <b>5</b>  |
| <b>SM A.4 PICTURES OF SOME OF THE SYSTEMS – FIELD TRIP 2017</b>                                                                  | <b>6</b>  |
| Hand pumps                                                                                                                       | 6         |
| Motorised pumps                                                                                                                  | 6         |
| Water trucking                                                                                                                   | 7         |
| Artesian spring                                                                                                                  | 7         |
| Water storage and distribution                                                                                                   | 7         |
| Surface treatment water                                                                                                          | 8         |
| <b>SM A.5 DESCRIPTION OF THE ALTERNATIVES</b>                                                                                    | <b>8</b>  |
| Types of pumping systems:                                                                                                        | 8         |
| How were the alternatives modelled?                                                                                              | 8         |
| <b>SM A.6 OPERATION AND MAINTENANCE DATA</b>                                                                                     | <b>10</b> |
| Hand pump                                                                                                                        | 10        |
| Motorized systems                                                                                                                | 10        |
| <b>SM A.7 SYSTEM COMPONENT: WHICH ACTIVITIES AND PROCESSES ARE INCLUDED?</b>                                                     | <b>12</b> |
| <b>SM A.8 QUESTIONNAIRE FOR THE END-USER SURVEY</b>                                                                              | <b>13</b> |
| <b>SM A.9 MATHEMATICAL EQUATIONS USED IN THE LIFE CYCLE COSTING</b>                                                              | <b>16</b> |
| Net Present Value (NPV)                                                                                                          | 16        |
| Unit NPV or NPV per m <sup>3</sup> of water                                                                                      | 17        |
| <b>SM A.10 WATER RATES IN THE WEST NILE REGION</b>                                                                               | <b>18</b> |
| <b>SM A.11 LIFE CYCLE INVENTORY OF THE CARBON FOOTPRINT</b>                                                                      | <b>19</b> |
| Hand pump                                                                                                                        | 19        |
| Motorised pumps                                                                                                                  | 20        |
| Direct emissions of diesel combustion in the diesel genset                                                                       | 22        |
| Water truck                                                                                                                      | 23        |
| <b>SM A.12 HAZARD ANALYSIS CRITICAL CONTROL POINT (HACCP) APPROACH</b>                                                           | <b>24</b> |
| <b>SM A.13 RESULTS FROM THE END-USERS SURVEY</b>                                                                                 | <b>25</b> |
| <b>SM A.14 RESULTS OF THE LCC: TOTAL COSTS [USD] ENCOUNTERED DURING THE FIRST YEAR OF OPERATION (CAPEX + FIRST YEAR OPEX)</b>    | <b>30</b> |
| <b>SM A.15 RESULTS OF THE LCC: UNIT COST [USD / M<sup>3</sup>] OF ALL THE ALTERNATIVES</b>                                       | <b>33</b> |
| <b>SM A.16 RESULTS OF THE LCC: UNIT COSTS [USD/M<sup>3</sup>], ECONOMY OF SCALE</b>                                              | <b>35</b> |
| <b>SM A.17 RESULTS OF THE LCC: O&amp;M UNIT COSTS [USD/M<sup>3</sup>]</b>                                                        | <b>37</b> |

---

## Supporting information

---

|                  |                                                                                                 |           |
|------------------|-------------------------------------------------------------------------------------------------|-----------|
| <b>SM A.18</b>   | <b>RESULTS OF THE LCC: O&amp;M UNIT COSTS [USD/M<sup>3</sup>] VS. LOCAL WATER FEES</b>          | <b>39</b> |
| <b>SM A.19</b>   | <b>RESULTS OF THE LCC: O&amp;M UNIT COSTS [USD/M<sup>3</sup>], ECONOMY OF SCALE</b>             | <b>42</b> |
| <b>SM A.20</b>   | <b>RESULTS OF THE LCC: O&amp;M COSTS, CONTRIBUTION ANALYSIS</b>                                 | <b>44</b> |
| <b>SM A.21</b>   | <b>RESULTS OF THE LCC: SCENARIO ANALYSIS</b>                                                    | <b>48</b> |
| <b>SM A.22</b>   | <b>RESULTS OF THE CARBON FOOTPRINT: TOTAL KG CO<sub>2</sub>-EQ</b>                              | <b>50</b> |
| <b>SM A.23</b>   | <b>RESULTS OF THE CARBON FOOTPRINT: KG CO<sub>2</sub>-EQ / M<sup>3</sup> OF WATER DELIVERED</b> | <b>52</b> |
| <b>SM A.24</b>   | <b>WATER AVAILABILITY</b>                                                                       | <b>54</b> |
| <b>SM A.25</b>   | <b>HAZARD ANALYSIS AND CRITICAL CONTROL POINTS (HACCPS)</b>                                     | <b>55</b> |
|                  | Hand pump                                                                                       | 55        |
|                  | Motorised systems (Diesel and solar powered pumping systems with gravity distribution pipes)    | 56        |
|                  | Water trucking                                                                                  | 58        |
| <b>REFERENCE</b> |                                                                                                 | <b>59</b> |

---

## **SM A.1 Ugandan government guidelines for building new water supply systems in refugee settlements in the West Nile region**

By November 2017, the government of Uganda provided the following guidelines to build new water supply systems in refugee settlements in the West Nile region:

- All the water tanks need to be made of steel instead than HDPE.
- The water production from boreholes should be maximised (if there is a borehole with a high yield, a large system should be implemented).
- The authorities are discouraging drilling of many shallow boreholes and the use of hand pumps. On the contrary, they are encouraging the use of deep wells and the maximisation of the yield found, meaning that hand pump should not be used if the pumping yield is high enough to motorise it. If the NGO does not have the money for motorization, it should make the borehole as a permanent one and then have added a motorised pump when possible.
- The boreholes should be at least 6" and cased at the bottom.
- In order to avoid over pumping, they are pushing for a constant groundwater monitoring.

## SM A.2 Stakeholder mapping and settlements

This annex shows the simplified stakeholders mapping in the emergency situations in Uganda (adapted from UNHCR (2018) Tange (2017) with the support of the Danish Refugee Council).

Generally, UNHCR and the Office of Prime Minister (OPM) are responsible for coordinating humanitarian refugee response in Uganda together with the UN and NGO partners. Furthermore, there are many other key partners in the coordination and funding such as ECHO, the EU Trust Fund, DFID and the US Department of state. In order to achieve an integrated emergency response, local authorities, relevant line ministries, members of the refugee and host community are also involved [1].

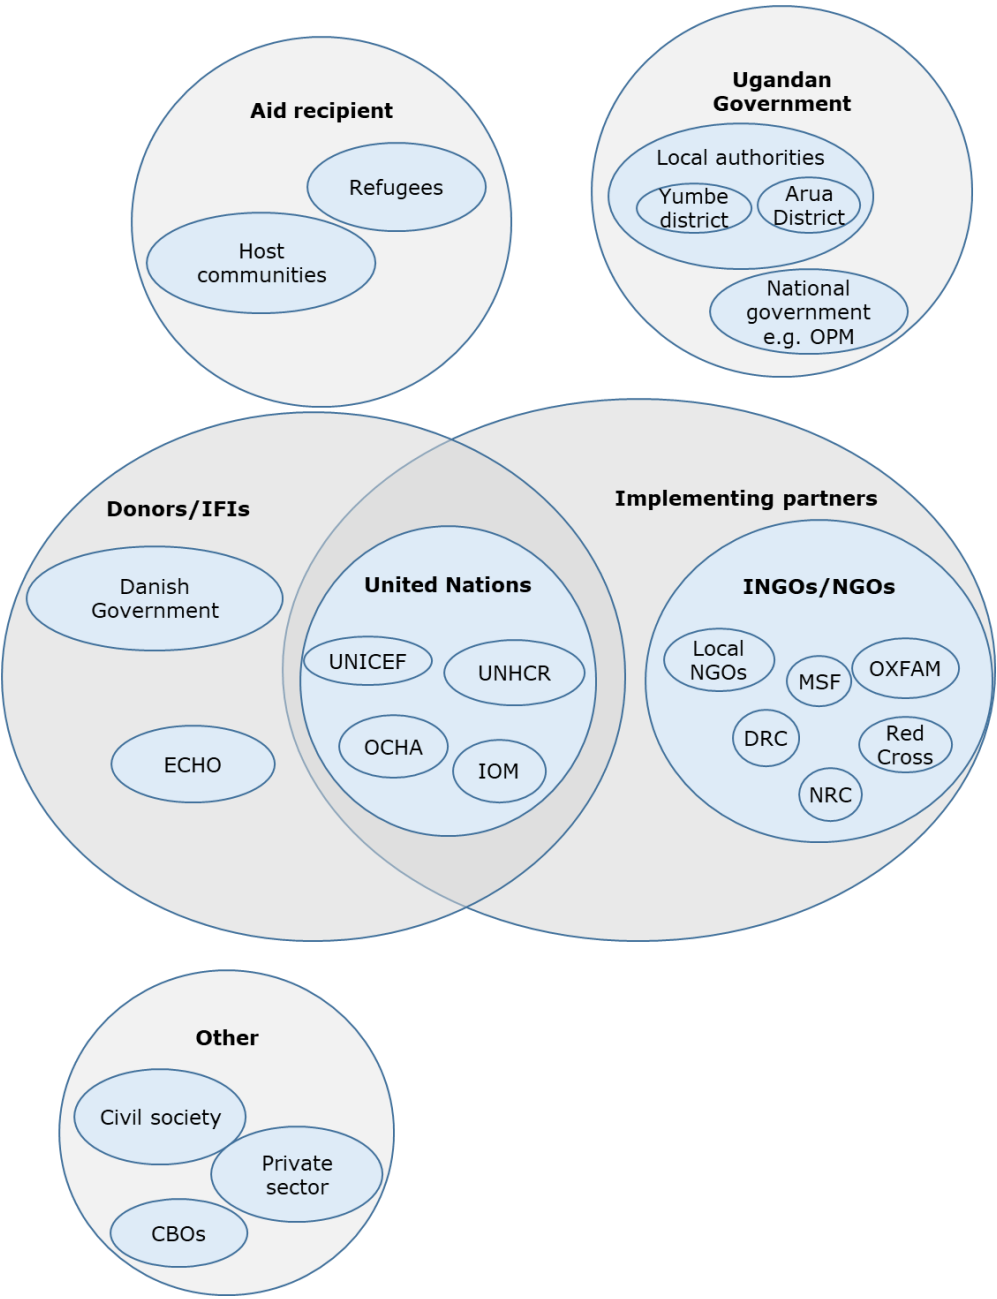

SM A.3      Location of the settlements

Figure 1 and Figure 2 show the location of the West Nile region and of the three settlements mentioned in this study: Bidibidi, Rhino and Imvepi settlements.

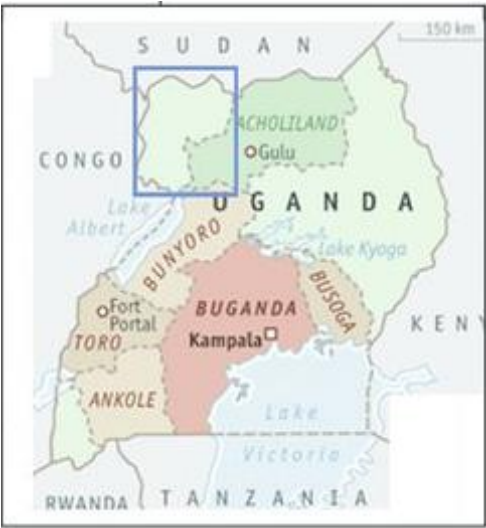

Figure 1: Map of Uganda showing the West Nile region [3]

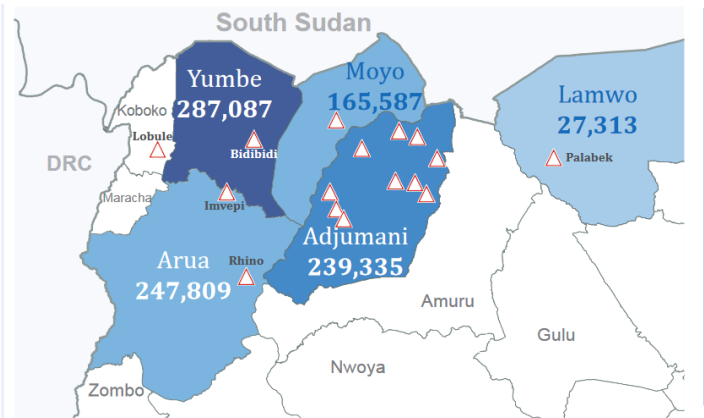

Figure 2: Map of the refugee camps in the North West region that shows the location of Bidibidi, Rhino ad Imvepi settlements.

## SM A.4 Pictures of some of the systems – field trip 2017

This paper focused on data mainly collected from three refugee settlements of the North West region of Uganda: Bidibidi located in Yumbe district, Rhino and Imvepi settlement both in the Arua district. This Annex shows the pictures of some sites visited during the field trip in November and December 2017.

### Hand pumps

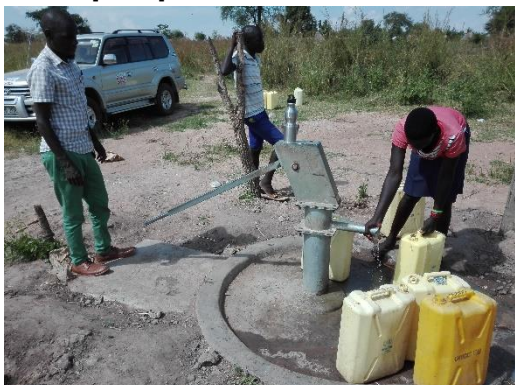

### Motorised pumps

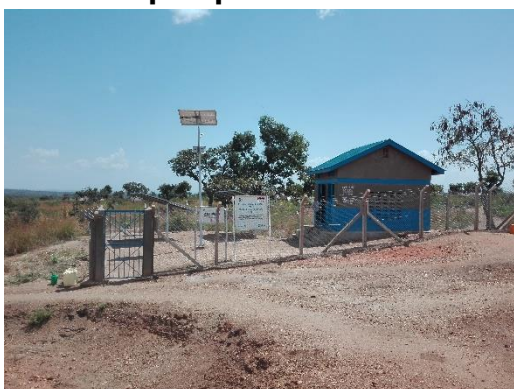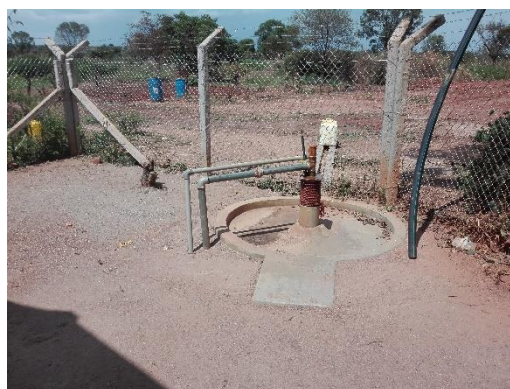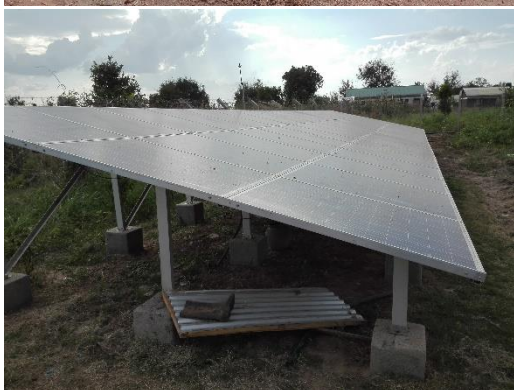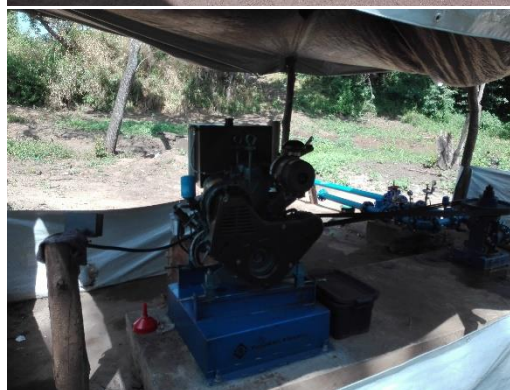



Supporting information

---

Water trucking

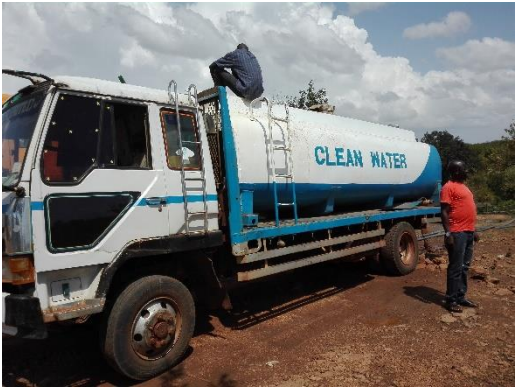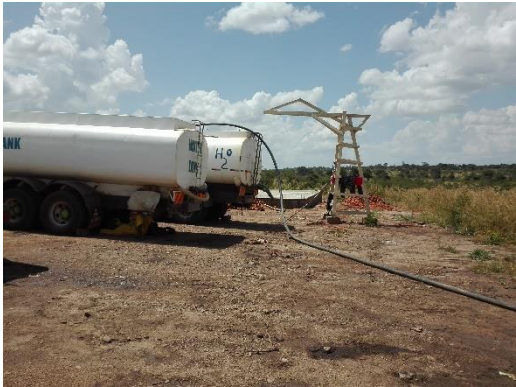

Artesian spring

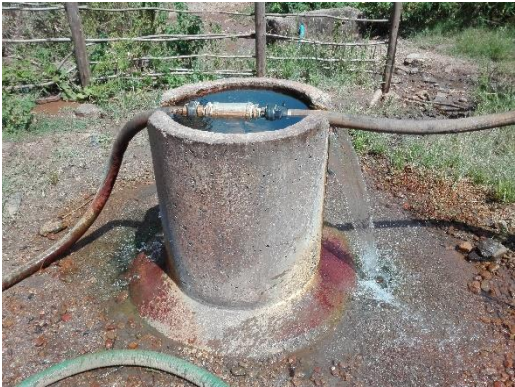

Water storage and distribution

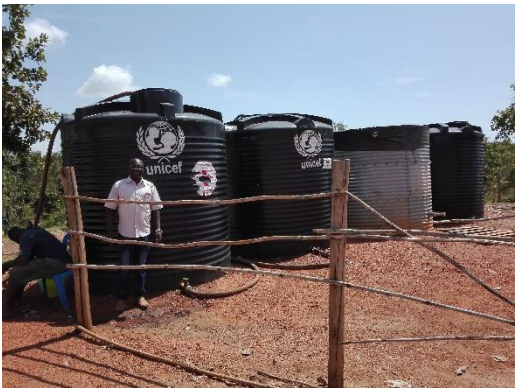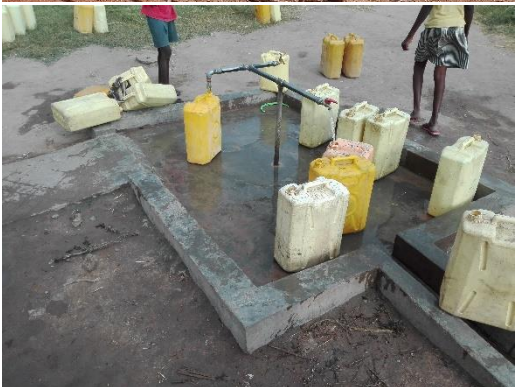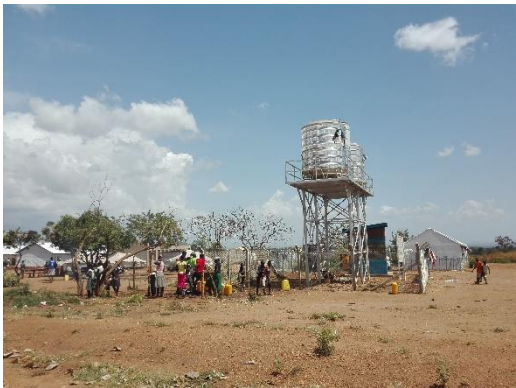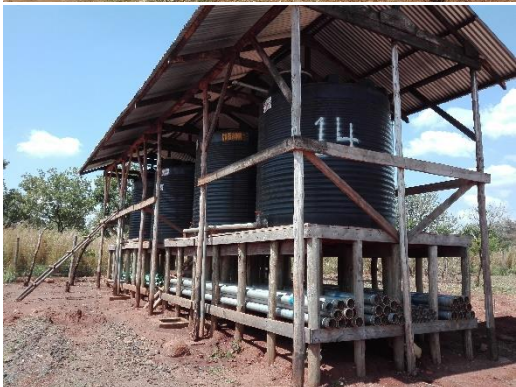



## Supporting information

---

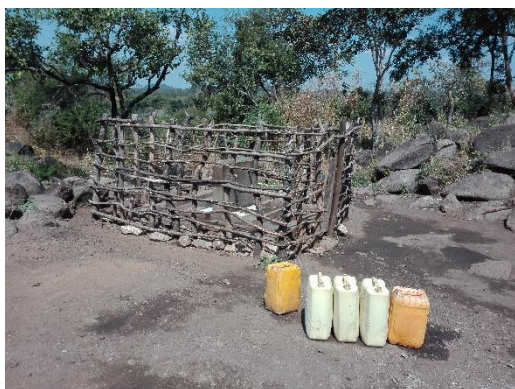

### Surface treatment water

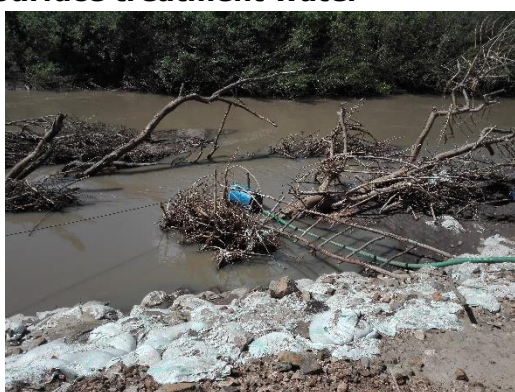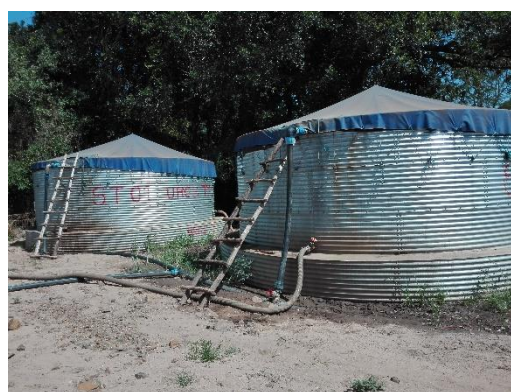

## SM A.5 Description of the alternatives

### Types of pumping systems:

- Hand pump: 0.8 m<sup>3</sup>/h used per 12 hours.
- Motorised borehole: modelled with different pumping yields (2, 5, 10, 25, 50 m<sup>3</sup>/h) in order to observe conclusions that are independent by the individual technical characteristics (more information on each system can be found in Table 1):
  - o Solar powered system, assumed 7 hours of full capacity a day. The cost of one solar panel is between 255 and 355 USD depending on the system.
  - o Diesel powered system (short), assumed 7 hours of full capacity a day (meaning that the daily water produced is the same as the solar powered system)
  - o Hybrid systems, 7 hours powered by solar energy and 3 hours (for the 2 and 5 m<sup>3</sup>/h) and 5 hours (for the 10, 25 and 50 m<sup>3</sup>/h) by diesel
  - o Diesel powered system (long), pumping assumed 10 hours a day if small yield (2 and 5 m<sup>3</sup>/h) and 12 hours a day for all the larger yield. This distinction was made because pumps used in low yield boreholes are not designed to run so many hours in a day.

### How were the alternatives modelled?

- The costs for the hand pump and all the solar powered systems were based on real costs for systems that have been designed by DRC in three refugee settlements in Uganda (Bidibidi, Rhino and Imvepi).
- The diesel-powered systems were built respecting the following rules:
  - o When running only for 7 hours per day, we assumed the same distribution system (length of the transmission and distribution pipes) as the solar
  - o When running for more hours (10 or 12) per day, the distribution system was assumed to be proportional to the quantity of water delivered
  - o The costs for the genset were based on the data given by a very common private supplier in the area. The genset synonym of generator set that is used to generate electricity.

## Supporting information

Table 1: Summary of the design of the alternatives

| Alternative | Pumping yield       | Daily time and power for pumping | Pumped water per year  | Water pump         |        | Solar panels              | Genset         |        | Pipes* | Storage           |
|-------------|---------------------|----------------------------------|------------------------|--------------------|--------|---------------------------|----------------|--------|--------|-------------------|
|             | [m <sup>3</sup> /h] |                                  | [m <sup>3</sup> /year] | [kW]               | USD    | USD                       | [kVA]          | USD    | [m]    | [m <sup>3</sup> ] |
| HP          | 0.8                 | 12h, Manual                      | 2,738                  | N/A                | 1,073  | N/A                       | N/A            |        | N/A    |                   |
| 2_S         | 2                   | 7h, Solar                        | 5,110                  | SQ 2.5N/A2, 1.4 kW | 1,656  | 4 pc 260 SW               | N/A            | N/A    | 300    | 10                |
| 2_Ds        | 2                   | 7h, Diesel                       | 5,110                  | "                  | "      | N/A                       | 3.5kW/4.4kVA   | 7,336  | 300    | 10                |
| 2_DI        | 2                   | 10h, Diesel                      | 7,300                  | "                  | "      | N/A                       | "              | "      | 364    | 10                |
| 5_S         | 5                   | 7h, Solar                        | 12,775                 | SP 7N/A27, 4 kW    | 2,732  | 19 pc 250/300 Wp          | N/A            | N/A    | 4,102  | 40                |
| 5_Ds        | 5                   | 7h, Diesel                       | 12,775                 | "                  | "      | N/A                       | 5.5kW/6.9kVA   | 7,601  | 4,102  | 40                |
| 5_H         | 5                   | Hybrid: 7h Solar + 3h Diesel     | 18,250                 | "                  | "      | As solar                  | "              | "      | 5,860  | 40                |
| 5_DI        | 5                   | 10h, Diesel                      | 18,250                 | "                  | "      | N/A                       | "              | "      | 5,860  | 40                |
| 10_S        | 10                  | 7h, Solar                        | 25,550                 | SP9N/A36, 7.5 kW   | 4,051  | 57 pc 250/300 Wp          | N/A            | N/A    | 6,140  | 60                |
| 10_Ds       | 10                  | 7h, Diesel                       | 25,550                 | "                  | "      | N/A                       | 18.8kW/23.4kVA | 13,655 | 6,140  | 60                |
| 10_H        | 10                  | Hybrid: 7h Solar + 5h Diesel     | 43,800                 | "                  | "      | As solar                  | "              | "      | 10,525 | 60                |
| 10_DI       | 10                  | 12h, Diesel                      | 43,800                 | "                  | "      | N/A                       | "              | "      | 10,525 | 60                |
| 25_S        | 25                  | 7h, Solar                        | 63,875                 | SP30N/A26, 22 kW   | 11,179 | 114 pc 250/300 Wp         | N/A            | N/A    | 5,383  | 120               |
| 25_Ds       | 25                  | 7h, Diesel                       | 63,875                 | "                  | "      | N/A                       | 55kW/68.8kVA   | 20,355 | 5,383  | 120               |
| 25_H        | 25                  | Hybrid: 7h Solar + 5h Diesel     | 109,500                | "                  | "      | As solar                  | "              | "      | 9,229  | 150               |
| 25_DI       | 25                  | 12h, Diesel                      | 109,500                | "                  | "      | N/A                       | "              | "      | 9,229  | 150               |
| 50_S        | 50                  | 7h, Solar                        | 127,750                | SP46N/A20, 30 kW   | 16.163 | 190 pc 250/260/265/280 Wp | N/A            | N/A    | 7,128  | 150               |
| 50_Ds       | 50                  | 7h, Diesel                       | 127,750                | "                  | "      | N/A                       | 75kW/93.8kVA   | 22,499 | 7,128  | 150               |
| 50_H        | 50                  | Hybrid: 7h Solar + 5h Diesel     | 219,000                | "                  | "      | As solar                  | "              | "      | 12,219 | 250               |
| 50_DI       | 50                  | 12h, Diesel                      | 219,000                | "                  | "      | N/A                       | "              | "      | 12,219 | 250               |
| 50_S2       | 50                  | 7h, Solar                        | 127,750                | SP46N/A20, 30 kW   | 16.163 | 190 pc 250/260/265/280 Wp | N/A            | N/A    | 2,024  | 150               |
| 50_Ds2      | 50                  | 7h, Diesel                       | 127,750                | "                  | "      | N/A                       | 75kW/93.8kVA   | 22,499 | 2,024  | 150               |
| 50_H2       | 50                  | Hybrid: 7h Solar + 5h Diesel     | 219,000                | "                  | "      | As solar                  | "              | "      | 3,470  | 250               |
| 50_DI2      | 50                  | 12h, Diesel                      | 219,000                | "                  | "      | N/A                       | "              | "      | 3,470  | 250               |

\* Transmission + distribution line

## Supporting information

**SM A.6 Operation and maintenance data**

Conversion rate: 1 UDX = 0.000278 USD.

**Hand pump**

- Yearly operation and maintenance
  - o 1 mechanic every 6 hand pumps
  - o Spare parts (30% of the value of the pump)
- Major maintenance
  - o Flush of the borehole every 2 years
  - o Change of the pedestrian stand every 3 years

**Motorized systems**

- Yearly operation
  - o Guards and attendants
    - 3 pump attendants for small systems (2 and 5 m<sup>3</sup>/h)
    - 4 pump attendants and 3 pump guards for large systems (10, 25 and 50 m<sup>3</sup>/h)
  - o Protective gears for guards
  - o Chlorine use (1 mg/l)
  - o Cleaning and repainting of the steel tanks (200 USD for a 10-20 m<sup>3</sup> tank, 250 USD for a 40-100 m<sup>3</sup> tank, 500 USD for a 100-150 m<sup>3</sup> tank)
  - o Diesel consumption: the cost of diesel in the baseline is 0.834 USD (3,000 UGX)
- Yearly maintenance
  - o Genset
    - Every 150 hours, you need to change the oil (5 litres for 2, 5 and 10 m<sup>3</sup>/h systems and 10 litres for 25 and 50 m<sup>3</sup>/h systems)
    - Every 150 hours, you need to change the oil filter and the diesel filter
    - Every 500 hours you need to change the air filter
  - o Generic maintenance solar (20 USD/ month for 2m<sup>3</sup>/h, 30 USD/ month for 5 m<sup>3</sup>/h, 50 USD/month for 10 m<sup>3</sup>/h, 100 USD m<sup>3</sup>/month for 25 m<sup>3</sup>/h and 200 USD /month for 50 m<sup>3</sup>/h)
  - o Contingencies (see Table 2 for the actual costs)
- Major maintenance
  - o Lifetime of the submersible pump (100% of the capital investment of the pump):
    - 5 years if used 10 or 12 hours per day,
    - 7 (for 2 and 5 m<sup>3</sup>/h systems) and 8 years (for 10, 25 and 50 m<sup>3</sup>/h) if used only 7 hours per day.
  - o Genset
    - Overhaul of the genset (30% of the capital investment for the genset):
      - 5,000 hours for small systems (2 and 5 m<sup>3</sup>/h) → 2 years if used 7 hours per day and 1.4 years if used 10 hours per day
      - 7,500 for large systems (10, 25 and 50 m<sup>3</sup>/h) → 2.9 years if used 7 hours per day, 1.7 years if used 12 hours per day
    - Lifetime of the genset (100% of the capital investment for the genset):
      - 15,000 hours for small systems (2 and 5 m<sup>3</sup>/h) → 5.9 years if used 7 hours per day, 4.1 years if used 10 hours per day
      - 25,000 for large systems (10, 25 and 50 m<sup>3</sup>/h) → 9.8 years if used 7 hours per day, 5.7 years if used 10 hours per day
  - o Solar panels
    - Replacement of the inverter every 7 years, 100% of the capital investment for the inverter
  - o Hybrid systems
    - Replacement of the switch every 5 years, 100% of the capital investment for the switch between solar and diesel

## Supporting information

Table 2: Detailed data and costs for O&amp;M

| Name   | Pumping yield | Pump                         |          | Genset   |      |          |      |                              | O&M costs                            |                   |               |
|--------|---------------|------------------------------|----------|----------|------|----------|------|------------------------------|--------------------------------------|-------------------|---------------|
|        |               | Power and hours              | Lifetime | Overhaul |      | Lifetime |      | Diesel consumption, 75% load | Cleaning and repainting of the tanks | Maintenance solar | Contingencies |
|        | [m³/h]        |                              | [years]  | Hour     | year | Hour     | year | l / h                        | USD / year                           | USD / month       | USD/year      |
| HP     | 0.8           | 12h, Manual                  | -        | -        | -    | -        | -    | -                            | -                                    | -                 | -             |
| 2_S    | 2             | 7h, Solar                    | 7        | -        | -    | -        | -    | -                            | 200                                  | 20                | 300           |
| 2_Ds   | 2             | 7h, Diesel                   | 7        | 5,000    | 2    | 15,000   | 5.9  | 1.4                          | 200                                  | N/A               | 500           |
| 2_DI   | 2             | 10h, Diesel                  | 5        | 5,000    | 1.4  | 15,000   | 4.1  | 1.4                          | 200                                  | N/A               | 500           |
| 5_S    | 5             | 7h, Solar                    | 7        | -        | -    | -        | -    | -                            | 250                                  | 30                | 400           |
| 5_Ds   | 5             | 7h, Diesel                   | 7        | 5,000    | 2    | 15,000   | 5.9  | 1.4                          | 250                                  | N/A               | 600           |
| 5_H    | 5             | Hybrid: 7h Solar + 3h Diesel | 5        | 5,000    | 1.4  | 15,000   | 4.1  | 1.4                          | 250                                  | 30                | 600           |
| 5_DI   | 5             | 10h, Diesel                  | 5        | 5,000    | 1.4  | 15,000   | 4.1  | 1.4                          | 250                                  | N/A               | 600           |
| 10_S   | 10            | 7h, Solar                    | 8        | -        | -    | -        | -    | -                            | 250                                  | 50                | 500           |
| 10_Ds  | 10            | 7h, Diesel                   | 8        | 7,500    | 2.9  | 25,000   | 9.8  | 4                            | 250                                  | N/A               | 750           |
| 10_H   | 10            | Hybrid: 7h Solar + 5h Diesel | 5        | 7,500    | 1.7  | 25,000   | 5.7  | 4                            | 250                                  | 50                | 750           |
| 10_DI  | 10            | 12h, Diesel                  | 5        | 7,500    | 1.7  | 25,000   | 5.7  | 4                            | 250                                  | N/A               | 750           |
| 25_S   | 25            | 7h, Solar                    | 8        | -        | -    | -        | -    | -                            | 500                                  | 100               | 750           |
| 25_Ds  | 25            | 7h, Diesel                   | 8        | 7,500    | 2.9  | 25,000   | 9.8  | 10.4                         | 500                                  | N/A               | 1,000         |
| 25_H   | 25            | Hybrid: 7h Solar + 5h Diesel | 5        | 7,500    | 1.7  | 25,000   | 5.7  | 10.4                         | 500                                  | 100               | 1,000         |
| 25_DI  | 25            | 12h, Diesel                  | 5        | 7,500    | 1.7  | 25,000   | 5.7  | 10.4                         | 500                                  | N/A               | 1,000         |
| 50_S   | 50            | 7h, Solar                    | 8        | -        | -    | -        | -    | -                            | 500                                  | 200               | 1,200         |
| 50_Ds  | 50            | 7h, Diesel                   | 8        | 7,500    | 2.9  | 25,000   | 9.8  | 14                           | 500                                  | N/A               | 1,800         |
| 50_H   | 50            | Hybrid: 7h Solar + 5h Diesel | 5        | 7,500    | 1.7  | 25,000   | 5.7  | 14                           | 750                                  | 200               | 1,800         |
| 50_DI  | 50            | 12h, Diesel                  | 5        | 7,500    | 1.7  | 25,000   | 5.7  | 14                           | 750                                  | N/A               | 1,800         |
| 50_S2  | 50            | 7h, Solar                    | 8        | -        | -    | -        | -    | -                            | 500                                  | 200               | 1,200         |
| 50_Ds2 | 50            | 7h, Diesel                   | 8        | 7,500    | 2.9  | 25,000   | 9.8  | 14                           | 500                                  | N/A               | 1,800         |
| 50_H2  | 50            | Hybrid: 7h Solar + 5h Diesel | 5        | 7,500    | 1.7  | 25,000   | 5.7  | 14                           | 750                                  | 200               | 1,800         |
| 50_DI2 | 50            | 12h, Diesel                  | 5        | 7,500    | 1.7  | 25,000   | 5.7  | 14                           | 750                                  | N/A               | 1,800         |

## Supporting information

**SM A.7 System component: which activities and processes are included?**

Table 3 describes which activities and processes are included in each system component for both hand pumps and motorised systems.

*Table 3: Explanation of which processes are included in each system component*

|                          | <b>Hand pump</b>                                                                                                                                        | <b>Motorised system</b>                                                                                                                                                                                                          |
|--------------------------|---------------------------------------------------------------------------------------------------------------------------------------------------------|----------------------------------------------------------------------------------------------------------------------------------------------------------------------------------------------------------------------------------|
| Borehole                 | Hydro-geological investigation, drilling the borehole (6"), borehole drilling, pipes screen casting, cement grouting, gravel park, compressor, concrete | Hydro-geological investigation, drilling the borehole (6" if low yield, 8" if high yield), borehole drilling, pipes screen casting, cement grouting, gravel park, compressor, concrete                                           |
| Site                     | Hand pump platform (including pedestal)                                                                                                                 | Concrete platform, construction of the security fence, chain link, gate, columns, guard's house, generator cage (if diesel powered or hybrid), water borne toilet, dosing house,                                                 |
| Pump                     | Hand pump and stainless-steel pipes and rods                                                                                                            | Submersible pump, chlorination system, power supply system (if solar powered system, including solar panels, metallic structure and inverter), genset (if diesel powered system) and switch between the two systems (if hybrid). |
| Distribution and storage |                                                                                                                                                         | Excavation and pipe laying for transmission and distribution line, taps, steel storage tanks.                                                                                                                                    |



## SM A.8 Questionnaire for the end-user survey

A questionnaire was designed in collaboration with DRC to understand the context related to the use of water by the South Sudanese refugees in Uganda. In May 2017, 400 households in Zone 1 of the Bidibidi settlement were surveyed as a representative sample for the total population of 51,000 people in that zone. A draft questionnaire was tested and adjusted for the final survey, based on three household visits. After adjustment, 16 enumerators conducted each 25 surveys among households in different villages of zone 1. These enumerators all had experience with executing a survey and were familiar with the survey format. Before executing the survey, two training sessions were held to ensure a uniform understanding of the questions and agreement on the translation into Arabic. The survey included the topics: demographics data and each household's water source; quantified water demand, water collection means, water use patterns; perceived quality of water, time spent at the pump; distance and time spent in travelling to and from the household to the water source. Results were compiled into a spreadsheet file for data processing, especially regarding the statistical significance of the results for different water sources.

Table 4 shows the original form of the end user survey.

Table 4: Original form of the end user survey.

|                                                                                                                                                                                                                                                                                                                                                                                                                                                                                                                                                                                                                                       |                                              |                                      |   |                  |   |                   |   |                  |   |
|---------------------------------------------------------------------------------------------------------------------------------------------------------------------------------------------------------------------------------------------------------------------------------------------------------------------------------------------------------------------------------------------------------------------------------------------------------------------------------------------------------------------------------------------------------------------------------------------------------------------------------------|----------------------------------------------|--------------------------------------|---|------------------|---|-------------------|---|------------------|---|
| 1. Introduce your <b>NAME, REASON</b> for the <b>ASSESSMENT</b> and mention that the beneficiary should be honest and there is <b>NO MONETARY/INCENTIVE/REGISTRATION</b> benefit from the discussion/session.<br>2. Ask for <b>PERMISSION</b> to continue with the questions<br>3. <b>DO NOT</b> make any promises/commitments, simply mention that you are just collecting data<br>4. Only mention the options if it is stated in the question, or if no answer is given<br>5. You can always check off more options if nothing else is stated in the question<br>6. <b>Thank the beneficiary</b> after finishing the questionnaire. |                                              |                                      |   |                  |   |                   |   |                  |   |
| <b>Interviewer / team no:</b>                                                                                                                                                                                                                                                                                                                                                                                                                                                                                                                                                                                                         |                                              |                                      |   |                  |   |                   |   |                  |   |
| <b>Location</b>                                                                                                                                                                                                                                                                                                                                                                                                                                                                                                                                                                                                                       |                                              | Zone _____ Village _____ Block _____ |   |                  |   |                   |   |                  |   |
| <b>Headed House Hold<br/>Male/Female/Child</b>                                                                                                                                                                                                                                                                                                                                                                                                                                                                                                                                                                                        | <b>Total<br/>people<br/>in<br/>household</b> | <b>Total</b>                         |   | <b>0-18 yrs.</b> |   | <b>19-59 yrs.</b> |   | <b>60 + yrs.</b> |   |
|                                                                                                                                                                                                                                                                                                                                                                                                                                                                                                                                                                                                                                       |                                              | M                                    | F | M                | F | M                 | F | M                | F |
|                                                                                                                                                                                                                                                                                                                                                                                                                                                                                                                                                                                                                                       |                                              |                                      |   |                  |   |                   |   |                  |   |

| N° | Question and Filter                                                                                                                                | Answers                                                                                                                                                                                                                                                                                                                   |
|----|----------------------------------------------------------------------------------------------------------------------------------------------------|---------------------------------------------------------------------------------------------------------------------------------------------------------------------------------------------------------------------------------------------------------------------------------------------------------------------------|
| 1. | Who collects the water                                                                                                                             | Man <input type="checkbox"/> Woman <input type="checkbox"/> Children <input type="checkbox"/>                                                                                                                                                                                                                             |
| 2. | Where do you get your water?                                                                                                                       | <input type="checkbox"/> Tap stand tank (trucking)<br><input type="checkbox"/> Tap stand<br><input type="checkbox"/> Handpump<br><input type="checkbox"/> Surface water (pond or river)                                                                                                                                   |
| 3. | How many jerrycans do you collect per day?<br>(Fill in number of jerrycans used to collect water)<br>Can I see the type of jerrycans that you use? | < 5 l _____<br>10 l _____<br>20 l _____<br>>20 l _____                                                                                                                                                                                                                                                                    |
| 4. | How far do you walk to the water source?                                                                                                           | <b>Answer provided in meters:</b><br><input type="checkbox"/> Less than 500 m<br><input type="checkbox"/> Between 500m and 1km<br><input type="checkbox"/> More than 1km<br><br><b>Answer provided in minutes:</b><br><input type="checkbox"/> Less than 15 minutes<br><input type="checkbox"/> Between 15 and 45 minutes |

## Supporting information

|     |                                                                             |                                                                                                                                                                                                                                                                                                                                                                                                                                                                                                                                                                                                                                                                                       |
|-----|-----------------------------------------------------------------------------|---------------------------------------------------------------------------------------------------------------------------------------------------------------------------------------------------------------------------------------------------------------------------------------------------------------------------------------------------------------------------------------------------------------------------------------------------------------------------------------------------------------------------------------------------------------------------------------------------------------------------------------------------------------------------------------|
|     |                                                                             | <input type="checkbox"/> <b>More than 45 minutes</b>                                                                                                                                                                                                                                                                                                                                                                                                                                                                                                                                                                                                                                  |
| 5.  | How much time do you spend waiting at the water point?                      | <input type="checkbox"/> <b>Less than 5 minutes</b><br><input type="checkbox"/> <b>Between 5 and 30 minutes</b><br><input type="checkbox"/> <b>Between 30 and 60 minutes</b><br><input type="checkbox"/> <b>More than 60 minutes</b>                                                                                                                                                                                                                                                                                                                                                                                                                                                  |
| 6.  | When do you need the most water?<br>(Only check one option)                 | <input type="checkbox"/> <b>Morning</b><br><input type="checkbox"/> <b>Afternoon</b><br><input type="checkbox"/> <b>Evening</b><br><input type="checkbox"/> <b>Night</b>                                                                                                                                                                                                                                                                                                                                                                                                                                                                                                              |
| 7.  | When do you collect the water?<br>(Only check one option)                   | <input type="checkbox"/> <b>Morning</b><br><input type="checkbox"/> <b>Afternoon</b><br><input type="checkbox"/> <b>Evening</b><br><input type="checkbox"/> <b>Night</b>                                                                                                                                                                                                                                                                                                                                                                                                                                                                                                              |
| 8.  | How is the quality of the water?                                            | <input type="checkbox"/> <b>Good</b><br><input type="checkbox"/> <b>Bad, it smells</b><br><input type="checkbox"/> <b>Bad, it tastes like chlorine</b><br><input type="checkbox"/> <b>Bad, it looks dirty</b><br><input type="checkbox"/> <b>Bad: _____ (fill in)</b>                                                                                                                                                                                                                                                                                                                                                                                                                 |
| 9.  | What do you use the water for?                                              | <input type="checkbox"/> <b>Drinking</b><br><input type="checkbox"/> <b>Cooking</b><br><input type="checkbox"/> <b>Cleaning (household)</b><br><input type="checkbox"/> <b>Personal hygiene</b><br><input type="checkbox"/> <b>Washing cloth</b><br><input type="checkbox"/> <b>Farming (growing crops)</b><br><input type="checkbox"/> <b>Farming (breeding animals)</b><br><input type="checkbox"/> <b>Construction materials (bricks, clay...)</b><br><input type="checkbox"/> <b>Other uses: _____ (fill in)</b>                                                                                                                                                                  |
| 10. | Do you have enough water                                                    | <input type="checkbox"/> <b>Yes</b><br><input type="checkbox"/> <b>No</b>                                                                                                                                                                                                                                                                                                                                                                                                                                                                                                                                                                                                             |
| 11. | If the answer is no: Why don't you have enough water?                       | <input type="checkbox"/> <b>There is not enough water at my water source</b><br><input type="checkbox"/> <b>It is too difficult to pump the water</b><br><input type="checkbox"/> <b>It is too hard to carry the water</b><br><input type="checkbox"/> <b>We don't have enough containers to either store or carry water</b><br><input type="checkbox"/> <b>The water is not good (taste, smell, quality)</b><br><input type="checkbox"/> <b>The water source is too far</b><br><input type="checkbox"/> <b>The waiting time is too long</b><br><input type="checkbox"/> <b>We don't feel safe going to the water point</b><br><input type="checkbox"/> <b>Other: _____ (fill in)</b> |
| 12. | If you had more water, what would you use it for?                           | <input type="checkbox"/> <b>Drinking</b><br><input type="checkbox"/> <b>Cooking</b><br><input type="checkbox"/> <b>Cleaning (household)</b><br><input type="checkbox"/> <b>Personal hygiene</b><br><input type="checkbox"/> <b>Washing cloth</b><br><input type="checkbox"/> <b>Farming (growing crops)</b><br><input type="checkbox"/> <b>Farming (breeding animals)</b><br><input type="checkbox"/> <b>Construction materials (bricks, clay...)</b><br><input type="checkbox"/> <b>Other uses: _____ (fill in)</b>                                                                                                                                                                  |
| 13. | How much water do you need?<br>(Fill in number of jerrycans the user needs) | <b>&lt; 5 l</b> _____<br><b>10 l</b> _____<br><b>20 l</b> _____<br><b>&gt;20 l</b> _____                                                                                                                                                                                                                                                                                                                                                                                                                                                                                                                                                                                              |

## Supporting information

| LIVELIHOOD |                                                                |                                                                                                                                                                                                                                                                                                                                                                                                                                                                                                                 |
|------------|----------------------------------------------------------------|-----------------------------------------------------------------------------------------------------------------------------------------------------------------------------------------------------------------------------------------------------------------------------------------------------------------------------------------------------------------------------------------------------------------------------------------------------------------------------------------------------------------|
| 14.        | What is your main source of income for the household?          | <input type="checkbox"/> <b>Selling food/animals</b><br><input type="checkbox"/> <b>Selling products/items</b><br><input type="checkbox"/> <b>Pastoral</b><br><input type="checkbox"/> <b>Brewing and selling alcohol</b><br><input type="checkbox"/> <b>Irregular labour for NGOs</b><br><input type="checkbox"/> <b>Irregular labour to community (e.g. farming for others, washing cloth, construction...)</b><br><input type="checkbox"/> <b>Regular employment</b><br><input type="checkbox"/> <b>None</b> |
| 15.        | What was your main source of income before becoming a refugee? | <input type="checkbox"/> <b>Selling food</b><br><input type="checkbox"/> <b>Selling products/items</b><br><input type="checkbox"/> <b>Pastoral</b><br><input type="checkbox"/> <b>Irregular labour (e.g. farming for others, washing cloth, construction...)</b><br><input type="checkbox"/> <b>Regular employment</b><br><input type="checkbox"/> <b>None</b>                                                                                                                                                  |
| 16.        | What do you need to become self-reliant/independent?           | <input type="checkbox"/> <b>More water</b><br><input type="checkbox"/> <b>Regular employment</b><br><input type="checkbox"/> <b>More land for farming/animals</b><br><input type="checkbox"/> <b>Better access to trading/market</b><br><input type="checkbox"/> <b>Education/training</b><br><input type="checkbox"/> <b>Electricity</b><br><input type="checkbox"/> <b>Better housing</b><br><input type="checkbox"/> <b>Other: _____ (fill in)</b>                                                           |

## SM A.9 Mathematical equations used in the Life cycle costing

### Net Present Value (NPV)

The Net Present Value or Present Worth is used in economy to compare expenditures and revenues that happen in different times and to quantify the fact that “a dollar today is better than a dollar tomorrow”. The unit of NPV is the currency used during the analysis, in this case USD. Equation 1 illustrates how NPV was calculated for the different timeframes without assuming any revenues. In the paper, we modelled 10 different timeframes (or years of operation): from 1 to 10 years.

*Equation 1: Net Present Value (NPV), where  $E_t$  is the expenditure at year  $t$ ,  $i$  is the discount rate,  $t$  the time and  $N$  is the defined timeframe*

$$NPV_{(i,t)} = \sum_{t=1}^N \frac{E_t}{(1+i)^{(t-1)}}$$

When the discounting rate is equal to 0%, NPV just indicates the cumulative total costs of the systems for the timeframe  $i$  (Equation 2). This means that the cumulative costs of a system at the year 2 is calculated by summing all the cost of the first and the second year. Table 5 and Table 5: Example of calculation of the NPV for different timeframes.

| Timeframe                  | How the NPV was calculated                                                                                                                                |
|----------------------------|-----------------------------------------------------------------------------------------------------------------------------------------------------------|
| N=1 → 1 <sup>st</sup> year | $NPV_{(0\%, t)} = \sum_{t=1}^1 \frac{E_t}{(1+i)^{(t-1)}} = \frac{E_1}{(1+0)^{(1-1)}} = E_1$                                                               |
| N=2 → 2 <sup>nd</sup> year | $NPV_{(0\%, t)} = \sum_{t=1}^2 \frac{E_t}{(1+i)^{(t-1)}} = \frac{E_1}{(1)^{(1-1)}} + \frac{E_2}{(1)^{(1-2)}} = E_1 + E_2$                                 |
| N=3 → 3 <sup>rd</sup> year | $NPV_{(0\%, t)} = \sum_{t=1}^3 \frac{E_t}{(1+i)^{(t-1)}} = \frac{E_1}{(1)^{(1-1)}} + \frac{E_2}{(1)^{(1-2)}} + \frac{E_3}{(1)^{(1-3)}} = E_1 + E_2 + E_3$ |

Table 6 shows the simplified calculation for the first 3 years of operation with a discount rate equal to 0%.

*Equation 2: NPV calculation in case the discounting factor is 0%, where  $t$  is the time*

$$NPV_{(0\%, t)} = CAPEX + \sum_{t=1}^N (OPEX)_t$$

Table 5: Example of calculation of the NPV for different timeframes.

| Timeframe                  | How the NPV was calculated                                                                                                                                |
|----------------------------|-----------------------------------------------------------------------------------------------------------------------------------------------------------|
| N=1 → 1 <sup>st</sup> year | $NPV_{(0\%, t)} = \sum_{t=1}^1 \frac{E_t}{(1+i)^{(t-1)}} = \frac{E_1}{(1+0)^{(1-1)}} = E_1$                                                               |
| N=2 → 2 <sup>nd</sup> year | $NPV_{(0\%, t)} = \sum_{t=1}^2 \frac{E_t}{(1+i)^{(t-1)}} = \frac{E_1}{(1)^{(1-1)}} + \frac{E_2}{(1)^{(1-2)}} = E_1 + E_2$                                 |
| N=3 → 3 <sup>rd</sup> year | $NPV_{(0\%, t)} = \sum_{t=1}^3 \frac{E_t}{(1+i)^{(t-1)}} = \frac{E_1}{(1)^{(1-1)}} + \frac{E_2}{(1)^{(1-2)}} + \frac{E_3}{(1)^{(1-3)}} = E_1 + E_2 + E_3$ |

Table 6: Example of calculation of the NPV for different timeframes when considering capital expenditures (CAPEX) and operation and maintenance expenditures (OPEX)

| Timeframe                  | How the NPV was calculated                                                                                                                                                                               |
|----------------------------|----------------------------------------------------------------------------------------------------------------------------------------------------------------------------------------------------------|
| N=1 → 1 <sup>st</sup> year | $NPV_{(0\%, t)} = CAPEX_1 + \sum_{t=1}^1 \frac{OPEX_t}{(1+i)^{(t-1)}} = \frac{OPEX_1}{(1+0)^{(1-1)}} = CAPEX + OPEX_1$                                                                                   |
| N=2 → 2 <sup>nd</sup> year | $NPV_{(0\%, t)} = CAPEX_1 + \sum_{t=1}^2 \frac{OPEX_t}{(1+i)^{(t-1)}} = CAPEX + \frac{OPEX_1}{(1)^{(1-1)}} + \frac{OPEX_2}{(1)^{(1-2)}} = CAPEX + OPEX_1 + OPEX_2$                                       |
| N=3 → 3 <sup>rd</sup> year | $NPV_{(0\%, t)} = CAPEX_1 + \sum_{t=1}^3 \frac{OPEX_t}{(1+i)^{(t-1)}} = CAPEX + \frac{OPEX_1}{(1)^{(1-1)}} + \frac{OPEX_2}{(1)^{(1-2)}} + \frac{OPEX_3}{(1)^{(1-3)}} = CAPEX + OPEX_1 + OPEX_2 + OPEX_3$ |

**Unit NPV or NPV per m<sup>3</sup> of water**

In order to compare water supply systems with a different water demand, we calculated the NPV per m<sup>3</sup> of water delivered. This parameter indicates how much a certain quantity of water (e.g. m<sup>3</sup>) should cost to the final consumer in order to achieve cost recovery after a certain amount of time (the timeframe) while considering the discount rate for both expenses and earnings. Full cost recovery means that in each timeframe the sum of the expenditures (CAPEX and OPEX) is equal to the sum of revenues (potential fees consumers have to pay for each m<sup>3</sup> of water) (Equation 3). The unit NPV of water is the same concept as levelized water cost (LWC) in Parajuli et al. (2014).

Equation 3: Unit cost or unit NPV, where  $E_t$  is the expenditure at year  $t$ ,  $R_t$  is the revenue at year  $t$   $i$  is the discount rate,  $t$  the time and  $N$  is the defined timeframe

$$\sum_{t=1}^N \frac{R_t}{(1+i)^{(t-1)}} = \sum_{t=1}^N \frac{E_t}{(1+i)^{(t-1)}} \rightarrow \sum_{t=1}^N R_t = \sum_{t=1}^N \frac{E_t}{(1+i)^{(t-1)}} * \sum_{t=1}^N (1+i)^{(t-1)} \rightarrow$$

$$\left[ \frac{USD}{m^3} \right] * m^3 \text{ delivered} = NPV_{(i,N)} \rightarrow \frac{NPV_{(i,N)}}{m^3} = \frac{\sum_{t=1}^N \frac{E_t}{(1+i)^{(t-1)}}}{\sum_{t=1}^N \frac{m_t^3}{(1+i)^{(t-1)}}}$$

When the discounting rate is equal to 0%, the unit NPV just indicates the cumulative total costs of the systems for the timeframe  $N$  divided the total amount of water produced in the entire timeframe  $N$  (Equation 4). This means that the unit NPV at year 5 is simply the ratio between the sum of all the costs from year 1 to year 5 and the sum of the water delivered in the 5 years. Table 7 shows the simplified calculations for the first 3 years of operation with a discount rate equal to 0%.

Equation 4: Unit cost (or unit NPV) NPV calculation in case the discounting factor is 0%

$$\frac{NPV_{(0\%, i)}}{m^3} = \frac{\sum_{i=1}^N (CAPEX + OPEX_i)}{\sum_{i=1}^N (\text{water delivered})_i}$$

Table 7: Example of calculation of the NPV for different timeframes when considering capital expenditures (CAPEX) and operation and maintenance expenditures (OPEX)

| Timeframe                  | How the unit NPV was calculated                                                               |
|----------------------------|-----------------------------------------------------------------------------------------------|
| N=1 → 1 <sup>st</sup> year | $unit\ NPV_{(0\%, t)} = \frac{CAPEX + OPEX_1}{water_1}$                                       |
| N=2 → 2 <sup>nd</sup> year | $unit\ NPV_{(0\%, t)} = \frac{CAPEX + OPEX_1 + OPEX_2}{water_1 + water_2}$                    |
| N=3 → 3 <sup>rd</sup> year | $unit\ NPV_{(0\%, t)} = \frac{CAPEX + OPEX_1 + OPEX_2 + OPEX_3}{water_1 + water_2 + water_3}$ |



## SM A.10 Water rates in the West Nile region

The following water rates were found in the West Nile region during the field trip (with a conversion rate of 0.000278 USD/UGX) and assuming that 1 m<sup>3</sup> of water = 40 jerrycans:

- Between 0.28 and 0.56 USD (1,000 to 2,000 UGX) per month per household in some rural areas with hand pumps. It means between 0.124 0.248 USD / m<sup>3</sup> (or between 444 and 888 UGX per m<sup>3</sup>) assuming 15 l/person/day and 5 persons/household
- Between 0.556 – 0.834 USD (2,000 to 3,000 UGX) per m<sup>3</sup> in some rural areas with motorised systems
- Between 0.556 – 0.973 USD (2,000 to 3,500 UGX) per m<sup>3</sup> in the city of Arua
- Around 0.0278 USD (100 UGX) per jerrycan in Arua equal to 1.11 USD (4,000 UGX) per m<sup>3</sup>
- 0.14 USD (500 UGX) per jerrycan in the town of Yumbe equal to 5.56 USD per m<sup>3</sup> (20,000 UGX) per m<sup>3</sup>
- Between 0.14 to 0.28 USD (500 and 1,000 UGX) per month per household in the Lobule settlement that host Congolese refugees. The settlement is already few years old. → Between 0.062 - 0.124 USD (222 and 444 UGX) per m<sup>3</sup> assuming 15l/person/day and 5 persons/household

## Supporting information

## SM A.11 Life cycle inventory of the carbon footprint

This annex describes which processes were included in the carbon footprint analysis and the comparison between the data available in the carbon footprint and the Life Cycle Costing. The majority of alternatives have similar processes that have been modelled based on the ecoinvent database (Table 8). The following paragraphs illustrate the detailed life cycle inventory for the carbon footprint.

Table 8: how did we model some of the process common to the majority of alternatives.

| Process                                                                                                                                                                          | How did we model the process                                                                                                                                                                                            |
|----------------------------------------------------------------------------------------------------------------------------------------------------------------------------------|-------------------------------------------------------------------------------------------------------------------------------------------------------------------------------------------------------------------------|
| Low-alloyed steel: fencing of the site, roof of the generator plinth and of the guards' house, structure of the solar panels, steel storage tank, structure for the storage tank | ecoinvent process: "steel production, low-alloyed, hot rolled; RoW"                                                                                                                                                     |
| Stainless steel: hand pump, motorised submersible pump,                                                                                                                          | ecoinvent process: "steel production, chromium steel 18/8, hot rolled, RoW"                                                                                                                                             |
| Cement and concrete production                                                                                                                                                   | ecoinvent process: "unreinforced concrete production, with cement CEM II/A; RoW"                                                                                                                                        |
| Gravel production                                                                                                                                                                | ecoinvent process: "market for gravel, crushed, RoW"                                                                                                                                                                    |
| PVC pipes production                                                                                                                                                             | ecoinvent process: "extrusion production, plastic pipes; RoW" + "polyvinylchloride production, suspension polymerisation"                                                                                               |
| inverter production                                                                                                                                                              | ecoinvent process: "inverter production, 2.5kW; RoW". We assumed a linear relationship between the size of the inverter and its environmental impact (to model a 5.5 kW inverter we just multiplied the process per 2). |
| Genset production                                                                                                                                                                | "diesel-electric generating set production 18.5 kW, RoW". We assumed a linear relationship between the size of the Genset and its environmental impact (to model a 9 kW genset, we just divided the process per 2).     |
| HDPE pipes production                                                                                                                                                            | ecoinvent processes: "Polyethylene production, high density, granulate; RoW" + "Extrusion production, plastic pipes; RoW".                                                                                              |
| Chlorine production for the diesel genset                                                                                                                                        | ecoinvent processes: "sodium hypochlorite production, product in 15% solution state; RoW"                                                                                                                               |
| Oil production for the diesel genset                                                                                                                                             | ecoinvent processes: "lubricating oil production; RoW"                                                                                                                                                                  |

## Hand pump

| LCA                                                                                                                                | Sources LCA                                                                            | LCC                                                                                                               |
|------------------------------------------------------------------------------------------------------------------------------------|----------------------------------------------------------------------------------------|-------------------------------------------------------------------------------------------------------------------|
| Construction                                                                                                                       |                                                                                        |                                                                                                                   |
| Borehole drilling                                                                                                                  |                                                                                        |                                                                                                                   |
| N/A*                                                                                                                               |                                                                                        | Performance bond<br>Hydro-geophysical investigation                                                               |
| N/A*                                                                                                                               |                                                                                        | Setting up and dismantling at every site                                                                          |
| Diesel for boring: 1.75 l / m                                                                                                      | Diesel consumption based on [5]                                                        | Drilling from 0-25m overburden; from 25-50m fractured zone or hard rock; from 50-75m fractured zone or hard rock. |
| PVC pipes with a density of 3.5 kg/m (process: production PVC from suspension + extrusion pipes): 60m + 0.6 m                      | Length consistent with the LCC. Average density between Schedule 40 = Schedule 80. [6] | Screen casings and plain casing                                                                                   |
| Assumed the cement grouting is used in the first 3m of the borehole (H = 3m) and thick 10 cm. The borehole of the hand pump is 6". | Assumption based on similar borehole drilling.                                         | Cement grouting                                                                                                   |
| Gravel 1,200 kg                                                                                                                    | Quantity consistent with the LCC                                                       | Gravel park 100 kgx12                                                                                             |
| N/A*                                                                                                                               |                                                                                        | Casting of sanitary seal                                                                                          |

## Supporting information

|                                                                                                                                                                                                                       |                                      |                                                                                                 |
|-----------------------------------------------------------------------------------------------------------------------------------------------------------------------------------------------------------------------|--------------------------------------|-------------------------------------------------------------------------------------------------|
| N/A*                                                                                                                                                                                                                  |                                      | Well development using development compressor.                                                  |
| N/A*                                                                                                                                                                                                                  |                                      | 4 hours aquifer test pumping of constant discharge.                                             |
| N/A*                                                                                                                                                                                                                  |                                      | Water quality analysis in a Government lab and on site.                                         |
| <b>Site</b>                                                                                                                                                                                                           |                                      |                                                                                                 |
| Concrete platform with a diameter of 1 m with a high of 0.2 m + additional 0.2 m <sup>3</sup> (for the place where people stand to use the pump + short drainage system). Unreinforced concrete, with cement CEM II/A | Dimensions based on the field trip.  | Construction of hand pump platform (concrete mix 1:2:4) including the installation of pedestal. |
| <b>Pump</b>                                                                                                                                                                                                           |                                      |                                                                                                 |
| 15 kg of low-alloyed steel                                                                                                                                                                                            | Data collected during the field trip | u- 2 hand pump complete with above mount supper structure.                                      |
| 25 kg stainless steel pipes (chromium steel 18/8)                                                                                                                                                                     | Data collected during the field trip | 32mm stainless steel pipes and rods of 3m length                                                |
| <b>Distribution and storage</b>                                                                                                                                                                                       |                                      |                                                                                                 |
| -                                                                                                                                                                                                                     |                                      | -                                                                                               |
| <b>Operation &amp; Maintenance</b>                                                                                                                                                                                    |                                      |                                                                                                 |
| <b>Yearly maintenance</b>                                                                                                                                                                                             |                                      |                                                                                                 |
| N/A*                                                                                                                                                                                                                  |                                      | Salary for the hand pump mechanics                                                              |
| 30% of the low-alloyed steel of the pump + 30% of the rods                                                                                                                                                            | 30% consistent with the LCC          | Spare parts (equal to 30% of the capital investment of the hand pump)                           |
| <b>Capital maintenance (every 3 years)</b>                                                                                                                                                                            |                                      |                                                                                                 |
| N/A*                                                                                                                                                                                                                  |                                      | Flush of the borehole                                                                           |
| 20% of the low-alloyed steel of the pump                                                                                                                                                                              | 20% consistent with the LCC          | Change of the pedestrian stand                                                                  |

N/A\* covers activities that are negligible in the carbon footprint

## Motorised pumps

| LCA                                                                                                                                                                                                                                                                                                                                                                                                                                                                                                                                                                                              | Sources LCA                                                                                                                                                                                                                              | LCC                                                                        |
|--------------------------------------------------------------------------------------------------------------------------------------------------------------------------------------------------------------------------------------------------------------------------------------------------------------------------------------------------------------------------------------------------------------------------------------------------------------------------------------------------------------------------------------------------------------------------------------------------|------------------------------------------------------------------------------------------------------------------------------------------------------------------------------------------------------------------------------------------|----------------------------------------------------------------------------|
| <b>Construction</b>                                                                                                                                                                                                                                                                                                                                                                                                                                                                                                                                                                              |                                                                                                                                                                                                                                          |                                                                            |
| <b>Borehole drilling</b>                                                                                                                                                                                                                                                                                                                                                                                                                                                                                                                                                                         |                                                                                                                                                                                                                                          |                                                                            |
| As in the hand pump, but with a depth of 75m and a borehole diameter of 8"                                                                                                                                                                                                                                                                                                                                                                                                                                                                                                                       | Consistent with the LCC.                                                                                                                                                                                                                 | As in the hand pump, but with a depth of 75m and a borehole diameter of 8" |
| <b>Site</b>                                                                                                                                                                                                                                                                                                                                                                                                                                                                                                                                                                                      |                                                                                                                                                                                                                                          |                                                                            |
| Concrete pump platform: 3mx2.5mx0.2m around the borehole + additional 0.2 m <sup>3</sup> (for the place where people stand to use the pump + short drainage system).                                                                                                                                                                                                                                                                                                                                                                                                                             | Based on the construction design of the 2 m <sup>3</sup> /h systems in Bidibidi settlement.                                                                                                                                              | Construction of the pump platform.                                         |
| <ul style="list-style-type: none"> <li>For the 2 m<sup>3</sup>/h systems: Steel zinc coated net (2m high x 39.2m long) + 16 metallic posts to support the net (4.5 kg/post) = 310 kg unalloyed steel the net with a unitary weight if 4.5 kg / post</li> <li>For all the other diesel systems: the site was assumed to be double than the one for the 2 m<sup>3</sup>/h systems (620 kg of steel for the fencing)</li> <li>For all the solar and hybrid system: the size of the site was based on the 2 m<sup>3</sup>/h and assumed to be proportional to the number of solar panels.</li> </ul> | Length of the metallic fencing from the construction design of the 2 m <sup>3</sup> /h systems in Bidibidi settlement. Weight of the metallic fence was 3 kg/m <sup>2</sup> [7]. The weight of the metallic post was 4.5 kg per post [8] | Metallic fencing                                                           |
| Guards' house: assumed a building of 8 m <sup>2</sup> : 9.4 m <sup>3</sup> cement + 14.4 m <sup>2</sup> of corrugated iron for the roof (modelled as low alloyed steel + zinc for the coating) – present in all the systems but the 2 m <sup>3</sup> /h                                                                                                                                                                                                                                                                                                                                          | Designed based on similar buildings visited during the field trip.                                                                                                                                                                       | Guards' house                                                              |

## Supporting information

|                                                                                                                                                                                                                                                                                                                                                                                                                                                                                                                                                                                                                  |                                                                                                                                                       |                                                                  |
|------------------------------------------------------------------------------------------------------------------------------------------------------------------------------------------------------------------------------------------------------------------------------------------------------------------------------------------------------------------------------------------------------------------------------------------------------------------------------------------------------------------------------------------------------------------------------------------------------------------|-------------------------------------------------------------------------------------------------------------------------------------------------------|------------------------------------------------------------------|
| <b>IF DIESEL</b>                                                                                                                                                                                                                                                                                                                                                                                                                                                                                                                                                                                                 |                                                                                                                                                       |                                                                  |
| Plinth for the generation: assumed a building of 8 m <sup>2</sup> : 9.4 m <sup>3</sup> cement + 14.4 m <sup>2</sup> of corrugated iron for the roof (modelled as low alloyed steel + zinc for the coating) – present in all the systems but the 2 m <sup>3</sup> /h                                                                                                                                                                                                                                                                                                                                              | Designed based on similar buildings visited during the field trip. Assumed to be the same as the guards' house.                                       | Plinth for the generator                                         |
| <b>Pump</b>                                                                                                                                                                                                                                                                                                                                                                                                                                                                                                                                                                                                      |                                                                                                                                                       |                                                                  |
| Stainless steel (chromium steel 18/8)                                                                                                                                                                                                                                                                                                                                                                                                                                                                                                                                                                            | Weight based on the technical specification of the pump                                                                                               | Submersible pump                                                 |
| N/A*                                                                                                                                                                                                                                                                                                                                                                                                                                                                                                                                                                                                             |                                                                                                                                                       | PVC pipe riser and pipe discharge                                |
| N/A*                                                                                                                                                                                                                                                                                                                                                                                                                                                                                                                                                                                                             |                                                                                                                                                       | Automatic chlorine dosing                                        |
| 2 kg of generic electronic components                                                                                                                                                                                                                                                                                                                                                                                                                                                                                                                                                                            | Assumed                                                                                                                                               | Control unit, switch box, antenna, array to box, etc.            |
| <b>IF SOLAR</b>                                                                                                                                                                                                                                                                                                                                                                                                                                                                                                                                                                                                  |                                                                                                                                                       |                                                                  |
| Solar panels. Each solar panel has a dimension of 1.7m <sup>2</sup>                                                                                                                                                                                                                                                                                                                                                                                                                                                                                                                                              | Number of panels and dimensions based on the information given in the LCC. Dimensions of the panels based on the SW 260: 17 m <sup>2</sup> /panel [9] | Solar panels                                                     |
| Inverter                                                                                                                                                                                                                                                                                                                                                                                                                                                                                                                                                                                                         | Consistent with the LCC.                                                                                                                              | Inverter                                                         |
| Structure for the solar panels. Assumed 100kg / kW                                                                                                                                                                                                                                                                                                                                                                                                                                                                                                                                                               | Assumed based on similar designs                                                                                                                      | Structure for solar panels                                       |
|                                                                                                                                                                                                                                                                                                                                                                                                                                                                                                                                                                                                                  |                                                                                                                                                       |                                                                  |
| <b>IF DIESEL</b>                                                                                                                                                                                                                                                                                                                                                                                                                                                                                                                                                                                                 |                                                                                                                                                       |                                                                  |
| Genset                                                                                                                                                                                                                                                                                                                                                                                                                                                                                                                                                                                                           | Consistent with the LCC.                                                                                                                              | Genset                                                           |
|                                                                                                                                                                                                                                                                                                                                                                                                                                                                                                                                                                                                                  |                                                                                                                                                       |                                                                  |
| <b>Distribution and storage</b>                                                                                                                                                                                                                                                                                                                                                                                                                                                                                                                                                                                  |                                                                                                                                                       |                                                                  |
| Low alloyed steel for the steel storage tank. The weight of the tank was calculated having an average density of 7,740 kg/m <sup>3</sup> and a thickness of 6 mm. The tanks were designed as following: <ul style="list-style-type: none"> <li>10 m<sup>3</sup> as a cylinder (H: 2m, diameter of the base: 2.32m)</li> <li>40 m<sup>3</sup> as a parallelepiped (L: 5m, D: 4m, H: 2m)</li> <li>60 m<sup>3</sup> as a parallelepiped (L: 6m, D: 5m, H: 2m)</li> <li>120 m<sup>3</sup> as a parallelepiped (L: 8m, D: 5m, H: 3m)</li> <li>150 m<sup>3</sup> as a parallelepiped (L: 10m, D: 5m, H: 3m)</li> </ul> | Density of steel as an average of stainless steel found in literature [10]                                                                            | Steel storage tank                                               |
| The structure for the steel tower was designed based on similar structures. The following structures were modelled for the study: <ul style="list-style-type: none"> <li>Structure for the 10 m<sup>3</sup> storage tank: 8m height; tot 2,566 kg</li> <li>Structure for the 40 m<sup>3</sup> storage tank: 10m height; tot 9,035 kg</li> <li>Structure for the 60 m<sup>3</sup> storage tank: 10m height; tot 9,035 kg</li> <li>Structure for the 120 m<sup>3</sup> storage tank: 12m height; tot 13,213 kg</li> <li>Structure for the 150 m<sup>3</sup> storage tank: 12m height; tot 17,516 kg</li> </ul>     | Based on similar structure visited                                                                                                                    | Structure of the steel storage tank                              |
| 0.19 l diesel/m <sup>3</sup> excavated. The dugs are 1 m deep and 0.40 m large.                                                                                                                                                                                                                                                                                                                                                                                                                                                                                                                                  | The dimensions of the dug are based on sites visited during the field trip. The diesel consumption was an average                                     | Excavation of trenches for the distribution + transmission lines |

## Supporting information

|                                                                                                                                                  |                                                                       |                                                                |
|--------------------------------------------------------------------------------------------------------------------------------------------------|-----------------------------------------------------------------------|----------------------------------------------------------------|
|                                                                                                                                                  | of values found in literature [11].                                   |                                                                |
| HDPE pipes with a density of 0.45 kg/m                                                                                                           | Density of HDPE pipes. 0.45 kg/m [12]                                 | Supply and installation of transmission and distribution pipes |
| N/A*                                                                                                                                             |                                                                       | Water meters                                                   |
| Concrete structure for the taps:<br>2m x 1.5m x 0.3m for the platform + 0.2 m <sup>3</sup> for the drainage<br>Neglected the steel for the taps. | Dimensions based on taps visited during the field trip                | Concrete structure for the taps x2                             |
| <b>Operation &amp; Maintenance</b>                                                                                                               |                                                                       |                                                                |
| <b>Yearly maintenance</b>                                                                                                                        |                                                                       |                                                                |
| 1 mg/l of sodium hypochlorite per litre of water treated                                                                                         | Based on the field trip                                               | Chlorine                                                       |
| N/A*                                                                                                                                             |                                                                       | Payment of pump attendants and guards                          |
| N/A*                                                                                                                                             |                                                                       | Cleaning and repainting of steel tanks                         |
| N/A*                                                                                                                                             |                                                                       | Generic maintenance                                            |
| N/A*                                                                                                                                             |                                                                       | Contingencies                                                  |
| <b>IF DIESEL</b>                                                                                                                                 |                                                                       |                                                                |
| Yearly diesel consumption including the impacts due to the production of diesel and the emissions during the combustion in the Genset (Table 9). | Consistent with the LCC                                               | Diesel consumption                                             |
| Yearly oil consumed with a density of 0.882 g/ml                                                                                                 | Consistent with the LCC. Density of the oil 0.882 g/ml [13]           | Oil consumption                                                |
| N/A*                                                                                                                                             |                                                                       | Oil filter, diesel filter and air filter                       |
| <b>Capital maintenance</b>                                                                                                                       |                                                                       |                                                                |
| stainless steel                                                                                                                                  | Consistent with the LCC. Same quantity as needed for an original pump | Pump replacement                                               |
| <b>IF SOLAR</b>                                                                                                                                  |                                                                       |                                                                |
| New inverter                                                                                                                                     | Consistent with the LCC                                               | Inverter replacement, every 7 years                            |
| <b>IF DIESEL</b>                                                                                                                                 |                                                                       |                                                                |
| Genset overhaul: 30% of a new Genset                                                                                                             | Consistent with the LCC                                               | Genset overhaul                                                |
| Genset replacement: 100% new Genset                                                                                                              | Consistent with the LCC                                               | Genset replacement                                             |

N/A\* covers activities that are negligible in the carbon footprint

## Direct emissions of diesel combustion in the diesel genset

The emissions of diesel combustion in the genset are based on the data for a diesel generator set of an average power of 35 kW and an average load factor of 0.5 [14]. The emissions per litre of fuel are assumed to be the same in all the alternatives (Table 9).

Table 9: Average emissions of Generator sets per litre of diesel, diesel in Finland in 2016 [14]

| Substance              |                  | Quantity [g/l fuel] |
|------------------------|------------------|---------------------|
| Carbon monoxide        | CO               | 17                  |
| Hydrocarbons           | HC               | 5                   |
| Nitrogen oxides        | NO <sub>x</sub>  | 25                  |
| Particulate matter     | PM               | 2.2                 |
| Methane, fossil        | CH <sub>4</sub>  | 0.15                |
| Dinitrogen monoxide    | N <sub>2</sub> O | 0.043               |
| Sulphur dioxide        | SO <sub>2</sub>  | 0.0081              |
| Carbon dioxide, fossil | CO <sub>2</sub>  | 2,656               |



## Supporting information

**Water truck**

The emissions of diesel combustion in a water truck were modelled as a EUR III, semi-trailer, gross vehicle mass, urban driving fully loaded [14]. The emissions of heavy metals were based on a EURO III truck present in the EASETECH database. The emissions per tkm are assumed to be the same in all the alternatives.

The emissions per litre of fuel are assumed to be the same in all the alternatives (Table 10).

*Table 10: Average emissions to air of "Semi trailer combination - Gross vehicle mass 40t, pay load capacity 25t - Urban driving, streets" [15]*

| <b>Name</b>                                   | <b>Amount</b> | <b>Unit</b> | <b>Comment</b>    |
|-----------------------------------------------|---------------|-------------|-------------------|
| Nitrogen oxides                               | 0.50          | kg / tkm    | from LIPASTO      |
| Sulphur dioxide                               | 0.00023       | kg / tkm    | from LIPASTO      |
| Carbon monoxide, fossil                       | 0.062         | kg / tkm    | from LIPASTO      |
| Hydrocarbons, aliphatic, alkanes, unspecified | 0.025         | kg / tkm    | from LIPASTO      |
| Carbon dioxide, fossil                        | 67            | kg / tkm    | from LIPASTO      |
| Arsenic                                       | 3.53E-13      | kg / tkm    | EASETECH database |
| Cadmium                                       | 1.68E-13      | kg / tkm    | EASETECH database |
| Chromium                                      | 5.56E-12      | kg / tkm    | EASETECH database |
| Copper                                        | 2.52E-10      | kg / tkm    | EASETECH database |
| Nickel                                        | 4.45E-12      | kg / tkm    | EASETECH database |
| Lead                                          | 1.56E-11      | kg / tkm    | EASETECH database |
| Selenium                                      | 1.18E-12      | kg / tkm    | EASETECH database |
| Zinc                                          | 6.22E-10      | kg / tkm    | EASETECH database |
| Particulates, < 2.5 um                        | 0.011         | kg / tkm    | from LIPASTO      |
| Methane, fossil                               | 0.0011        | kg / tkm    | from LIPASTO      |
| Dinitrogen monoxide                           | 0.00036       | kg / tkm    | from LIPASTO      |

## **SM A.12 Hazard Analysis Critical Control Point (HACCP) approach**

The Hazard Analysis Control Point (HACCP) approach is a systematic preventive approach developed in the 1970s by the World Health Organisation (WHO) and used for decades to ensure food safety. HACCP has been applied on drinking water production in 1994 in Havelaar (1994). HACCP leads “process control away from end-point testing and towards control of the critical operations earlier in the process” by emphasizing the importance of not relying only on treatments as a barrier to water contamination [17]. HACCP could be performed both by NGOs (e.g. DRC) or responsible for the refugee settlements (e.g. local authorities in Uganda) to find where the major risks are. HACCP is composed originally of 7 steps: 1) conduct a hazard analysis, 2) determine the Critical Control Points (CCPs), 3) establish critical limits, 4) a monitoring system, 5) corrective actions for when a CCP is not under control, 6) verification procedures and 7) documentation. All the alternatives can be grouped in three large groups: hand pump, motorised systems with distribution piping, water trucking. This paper analyses the main risks and the Critical Control Points.

## SM A.13 Results from the end-users survey

Table 11 summarises the main findings of the end user survey for each question in the questionnaire. *Figure 3 to Figure 19*

Table 11: Results of the end users survey

| Object                                              | Results and comments                                                                                                                                                                                                                                                                                                                                                                                                                                                                                                      |
|-----------------------------------------------------|---------------------------------------------------------------------------------------------------------------------------------------------------------------------------------------------------------------------------------------------------------------------------------------------------------------------------------------------------------------------------------------------------------------------------------------------------------------------------------------------------------------------------|
| Gender and age of the interviewees                  | The interviewees were 46% male and 54% female (Figure 3) and 67% of the interviewees were less than 19 years old (Figure 4). These results well represent both the distribution of gender and age in Bidibidi settlement, where 53% of the refugees are female and 71% is between 0 and 17 [18]                                                                                                                                                                                                                           |
| Responsible for collecting water                    | Women (68%) and children (26%) (Figure 5).                                                                                                                                                                                                                                                                                                                                                                                                                                                                                |
| Source of income of refugees                        | The majority of refugees don't have any source of income or earn some money by selling food and animals (Figure 6).                                                                                                                                                                                                                                                                                                                                                                                                       |
| When do people use and collect water                | The great majority of the people use and collect water in the morning for various reasons – i.e. temperature of the day or water supply (Figure 7). This peak demand could put pressure on the water system.                                                                                                                                                                                                                                                                                                              |
| Water source                                        | 31% at a handpump, 27% at a tap stands supplied by water trucking and 42% at a tap stand supplied by a motorised system (solar or diesel) (Figure 8)                                                                                                                                                                                                                                                                                                                                                                      |
| Water accessibility                                 | Large variability. Almost 50% states to have less than the minimum of 15 litres per person per day as is required by the Sphere standards (Figure 9). 3 out of 4 households express they would like more water than is currently supplied. The average is 17.9 (similar to the results found in UNOPS 2017) and the median is 16                                                                                                                                                                                          |
| Quality of water                                    | Only half of the interviewees think that the water is of good quality (Figure 11). Chlorine is the major issue for 20% of the refugees that are using tap stands – supplied by trucking or generators. This indicates that there is either too much chlorine in the water, or not enough awareness concerning chlorine. Other reasons like the colour of the water and the presence of salt take up between 30 and 45% of the interviewees per type of pump.                                                              |
| Waiting time at the water source                    | 55% of the people declared to wait for more than 60 min at the water source (Figure 12 and Figure 13), longer than required by the Sphere standards – there is no significant difference between the type of pumps.                                                                                                                                                                                                                                                                                                       |
| Distance from household to a water source           | Only 60% of the refugees state to live within the minimum standard of 500m from a water source (Figure 14 and Figure 15). As it is hard for some refugees to estimate the distance, they were also allowed to express distance in time (Figure 16 and Figure 17). Interpreting the data of the distance between the household and the water source is a challenge – since their walking speed remains also an estimation. For this survey the walking speed in the specific context and with jerry cans is set at 2 km/h. |
| Reasons for an insufficient amount of water         | The three major reasons for the insufficient amount of water cover 75% of the answers (Figure 10): not enough jerry cans to either store or carry the water, too long queuing times and not enough water at the source. Naturally, physical labour is only an issue for the hand pump.                                                                                                                                                                                                                                    |
| Comparison between desired and current use of water | Refugees wish to use more water for farming - growing crops and breeding animals - and construction materials (Figure 18).                                                                                                                                                                                                                                                                                                                                                                                                |
| Wished livelihood opportunities                     | The most common wished livelihood opportunities in order to become self-reliant are: demand for more education, more land for farming and animals, a better access to markets for trading. The top 4 is completed with the demand for more water (Figure 19).                                                                                                                                                                                                                                                             |

Supporting information

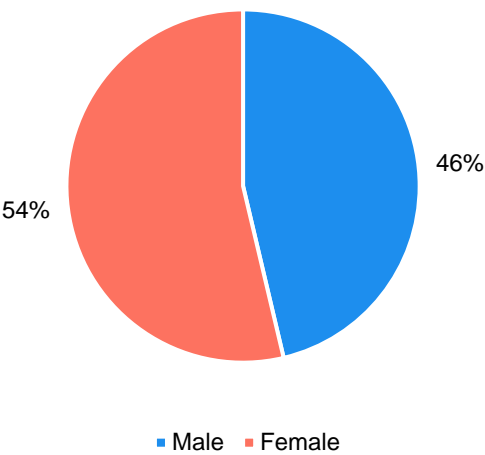

Figure 3: Gender of the sample group

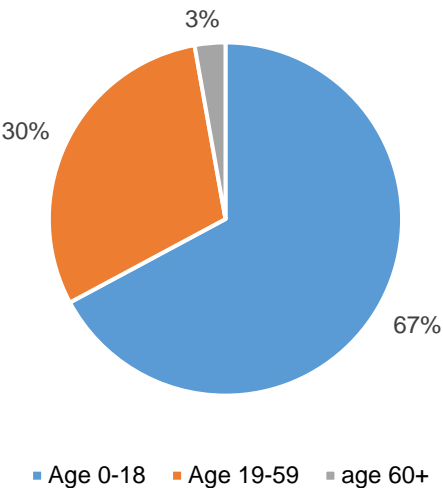

Figure 4: Age of the sample group

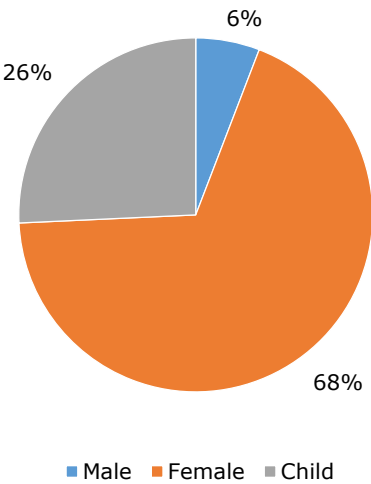

Figure 5: Work division of the sample group

- Selling food/Animals
- Selling products/items
- Pastoral
- Brewing and Selling alcohol
- Irregular Labour for NGOs
- Irregular labour for community
- Regular Employment
- None

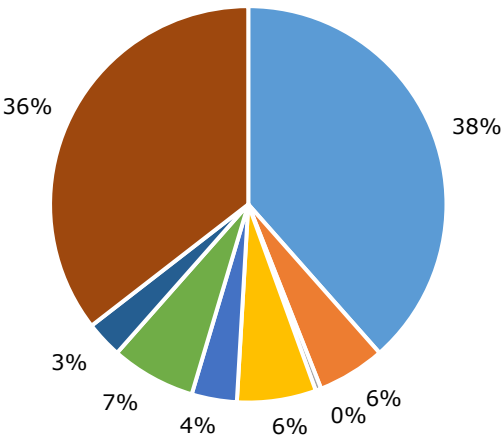

Figure 6: Main source of income for the households

Supporting information

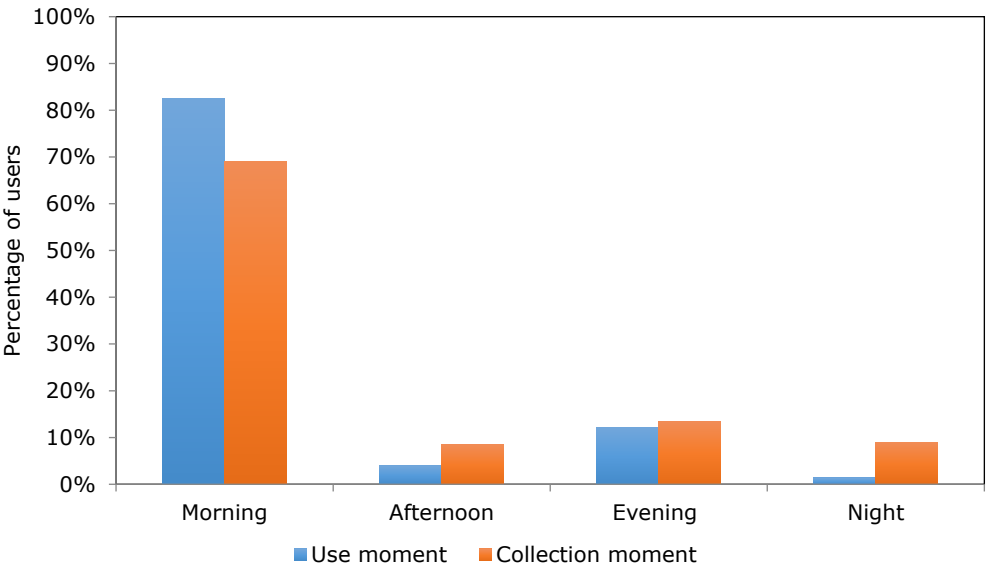

Figure 7: Water collection and use moment of the refugees

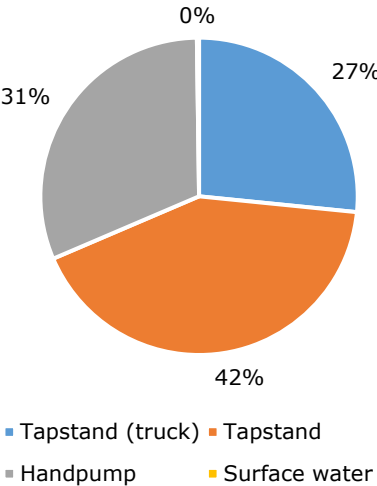

Figure 8: Type of water source

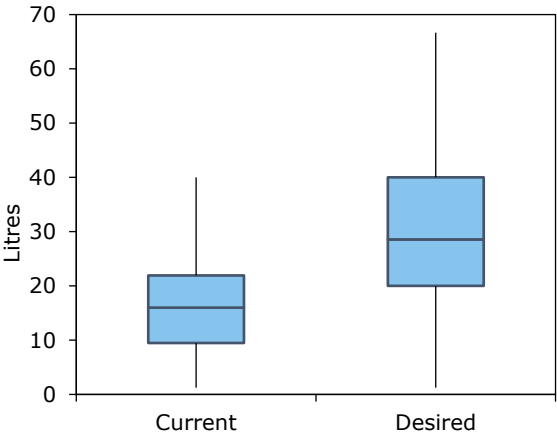

Figure 9: Boxplot of the amount of water declared per person per day

- There is not enough water at my water source
- It is too difficult to pump the water
- It is too hard to carry the water
- We don't have enough containers to either store or carry water
- The water is not good (taste, smell, quality)
- The water source is too far
- The waiting time is too long
- We don't feel safe going to the water point

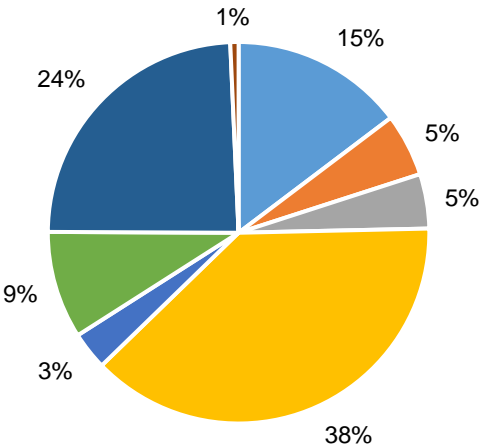

Figure 10: Reasons for an insufficient amount of water. People could choose more than one option.

## Supporting information

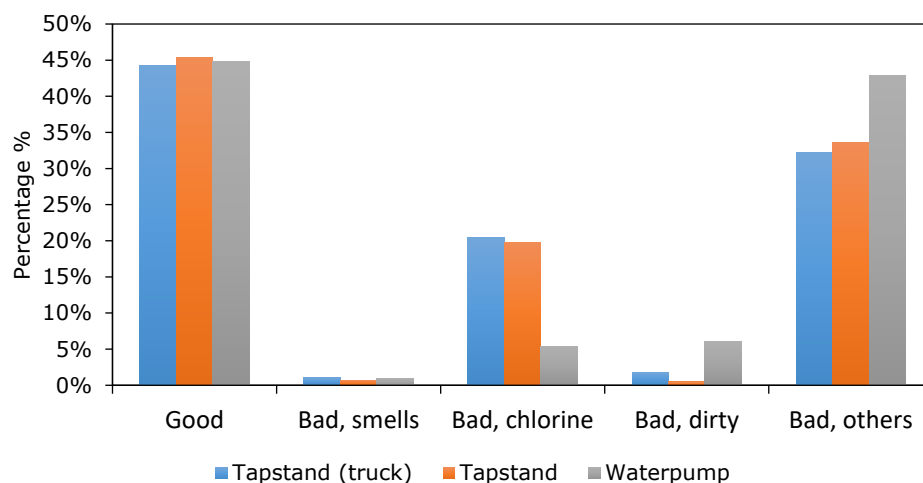

Figure 11: Quality of water per type of pump. Only the differences for chlorine are significant.

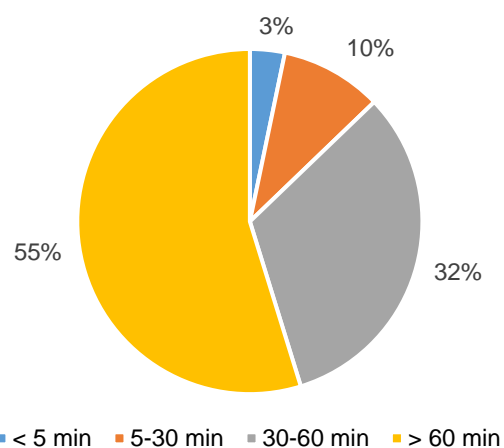

Figure 12: Time spent at the pump

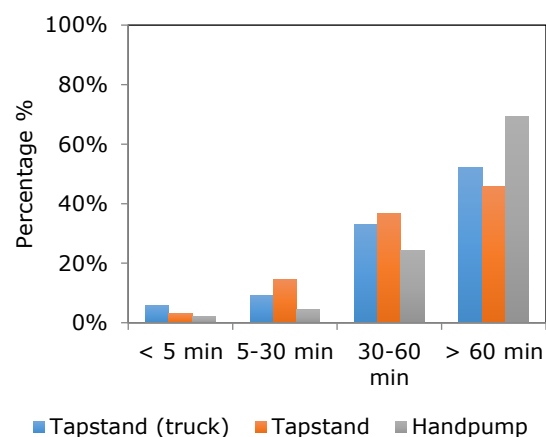

Figure 13: Time spent at the pump per type of pump

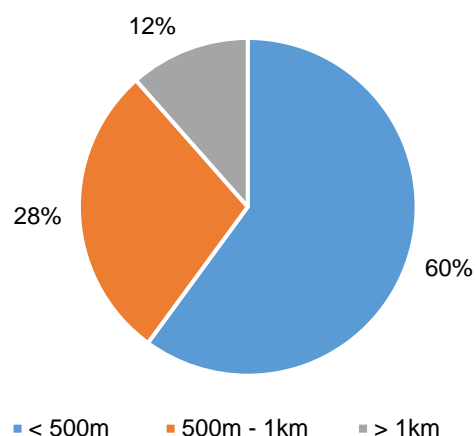

Figure 14: Travel distance

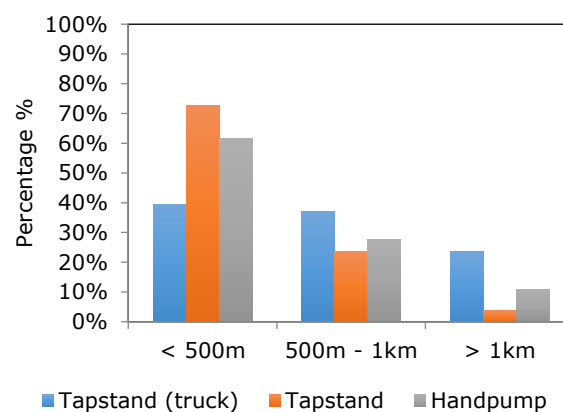

Figure 15: Travel distance per type of pump with a significant difference for the systems at < 500m.

## Supporting information

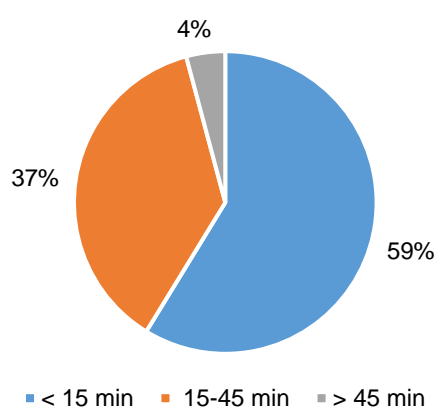

Figure 16: Travel time to the pump

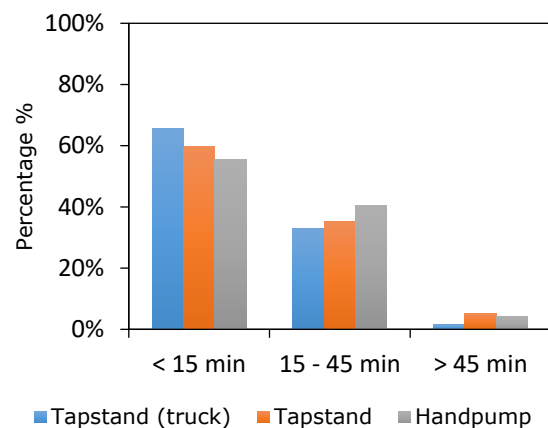

Figure 17: Travel time per type of pump

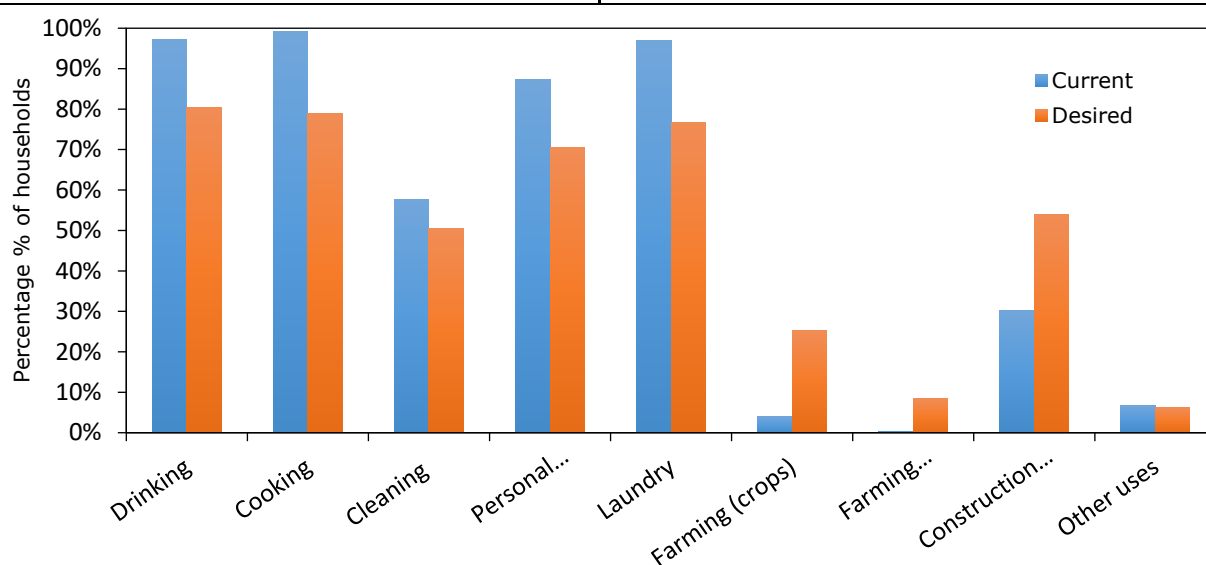

Figure 18: Current and desired usage of water

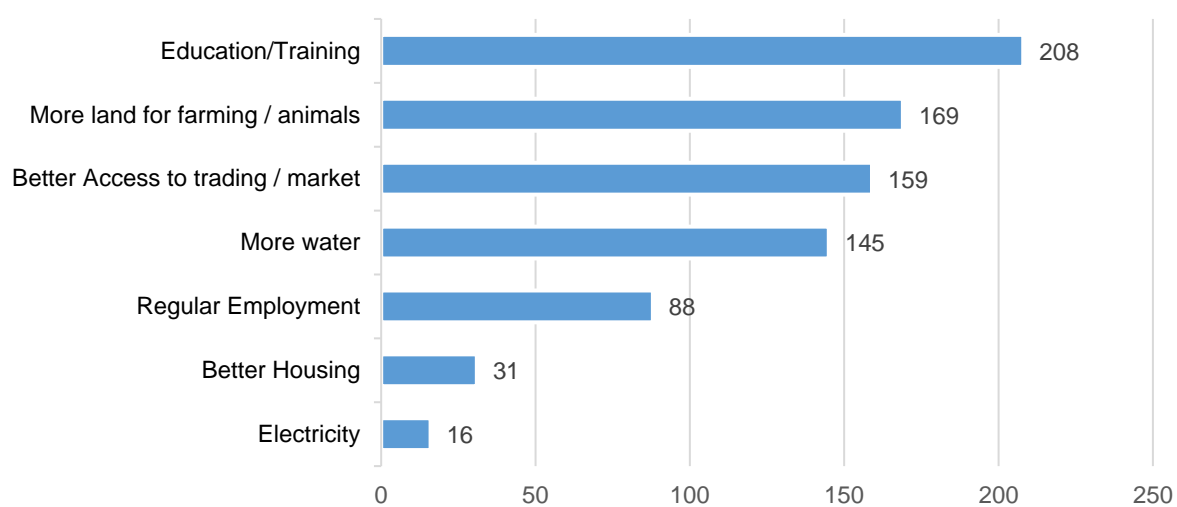

Figure 19: Self-reliance of the refugees. Answer to the question: "What would you need to become self-reliant?"



## Supporting information

## SM A.14 Results of the LCC: total costs [USD] encountered during the first year of operation (CAPEX + first year OPEX)

Table 12 and Table 13 show the total costs in USD encountered during the first year of operation (capital expenditure and O&M costs in the 1<sup>st</sup> year).

Table 12: total expenditures encountered during the first year (CAPEX + 1<sup>st</sup> year O&M) for the hand pump and the motorised systems with a pumping yield of 2, 5 and 10 m<sup>3</sup>/h. \*The hand pump should serve maximum 500 people (SPHERE standards)

|                                     | HP     | 2_S    | 2_Ds   | 2_DI   | 5_S     | 5_Ds    | 5_H     | 5_DI    | 10_S    | 10_Ds   | 10_H    | 10_DI   |
|-------------------------------------|--------|--------|--------|--------|---------|---------|---------|---------|---------|---------|---------|---------|
| <b>m<sup>3</sup>/day</b>            | 7.5*   | 14     | 14     | 20     | 35      | 35      | 50      | 50      | 70      | 70      | 120     | 120     |
| <b>m<sup>3</sup>/year</b>           | 2,738* | 5,110  | 5,110  | 7,300  | 12,775  | 12,775  | 18,250  | 18,250  | 25,550  | 25,550  | 43,800  | 43,800  |
| [Borehole]                          | 4,879  | 11,932 | 11,932 | 11,932 | 18,328  | 18,328  | 18,328  | 18,328  | 18,328  | 18,328  | 18,328  | 18,328  |
| [Site]                              | 289    | 3,740  | 6,127  | 6,127  | 16,265  | 18,652  | 18,652  | 18,652  | 21,757  | 24,144  | 24,144  | 24,144  |
| [Pump]                              | 1,266  | 8,481  | 15,651 | 15,651 | 48,769  | 34,486  | 59,378  | 34,486  | 78,629  | 45,038  | 98,022  | 45,038  |
| [Distribution]                      | 0      | 24,769 | 24,769 | 27,652 | 105,619 | 105,619 | 138,400 | 138,400 | 137,892 | 137,892 | 201,355 | 201,355 |
| <b>TOT Capex</b>                    | 6,433  | 48,922 | 58,479 | 61,362 | 188,982 | 177,086 | 234,759 | 209,867 | 256,606 | 225,402 | 341,850 | 288,865 |
| <b>1st year O&amp;M</b>             | 485    | 4,132  | 7,686  | 9,243  | 4,461   | 8,004   | 6,291   | 9,634   | 9,037   | 18,015  | 16,091  | 24,819  |
| <b>TOT capex + 1st year O&amp;M</b> | 6,918  | 53,054 | 66,166 | 70,606 | 193,444 | 185,090 | 241,050 | 219,500 | 265,643 | 243,417 | 357,941 | 313,685 |

Table 13: total expenditures encountered during the first year (CAPEX + 1<sup>st</sup> year O&M) for the motorised systems with a pumping yield of 25 and 50 m<sup>3</sup>/h and the water trucking

|                                     | 25_S    | 25_Ds   | 25_H    | 25_DI   | 50_S    | 50_Ds   | 50_H    | 50_DI   | 50_S2   | 50_Ds2  | 50_H2   | 50_DI2  | Truck (1) |
|-------------------------------------|---------|---------|---------|---------|---------|---------|---------|---------|---------|---------|---------|---------|-----------|
| <b>m<sup>3</sup>/day</b>            | 175     | 175     | 300     | 300     | 350     | 350     | 600     | 600     | 350     | 350     | 600     | 600     | 300       |
| <b>m<sup>3</sup>/year</b>           | 63,875  | 63,875  | 109,500 | 109,500 | 127,750 | 127,750 | 219,000 | 219,000 | 127,750 | 127,750 | 219,000 | 219,000 | 109,500   |
| [Borehole]                          | 22,832  | 22,832  | 22,832  | 22,832  | 22,832  | 22,832  | 22,832  | 22,832  | 22,832  | 22,832  | 22,832  | 22,832  | 22,832    |
| [Site]                              | 36,235  | 38,622  | 38,622  | 38,622  | 36,235  | 38,622  | 38,622  | 38,622  | 36,235  | 38,622  | 38,622  | 38,622  | 38,622    |
| [Pump]                              | 130,862 | 66,552  | 157,571 | 66,552  | 239,168 | 110,541 | 268,504 | 110,541 | 232,015 | 102,143 | 261,352 | 102,143 | 66,552    |
| [Distribution]                      | 196,592 | 196,592 | 285,627 | 285,627 | 293,270 | 293,270 | 504,369 | 504,369 | 216,958 | 216,958 | 370,729 | 370,729 | 0         |
| <b>TOT Capex</b>                    | 386,521 | 324,597 | 504,652 | 413,632 | 591,504 | 465,264 | 834,327 | 676,364 | 508,040 | 380,555 | 693,534 | 534,326 | 128,005   |
| <b>1st year O&amp;M</b>             | 10,433  | 33,029  | 27,854  | 50,200  | 12,083  | 42,265  | 36,023  | 65,105  | 12,683  | 42,265  | 36,023  | 65,105  | 788,738   |
| <b>TOT capex + 1st year O&amp;M</b> | 396,954 | 357,626 | 532,506 | 463,833 | 603,587 | 507,530 | 870,350 | 741,469 | 520,723 | 422,821 | 729,557 | 599,431 | 916,743   |

## Supporting information

Table 14 and Table 15 show a detailed analysis of the capital expenditures for all the alternatives, where:

- Pump includes the installation of the submersible pump, of the slicing kit, cable and control unit, of the riser mains and well head plumbing material, etc.
- Pipes excavation includes the general clearance along the pipeline, drainage channel, excavation of the trenches, a deposit of the excavated material, etc.
- Pipes supply includes supply, lay and set the distribution and installation pipes, marker posts for pipeline, taps, etc.

Table 14: Detailed analysis of the capital expenditures of the hand pump and of the motorised systems with a pumping yield of 2, 5 and 10 m<sup>3</sup>/h. \*The hand pump should serve maximum 500 people (SPHERE standards)

|                            | HP     | 2_S    | 2_Ds   | 2_DI   | 5_S     | 5_Ds    | 5_H     | 5_DI    | 10_S    | 10_Ds   | 10_H    | 10_DI   |
|----------------------------|--------|--------|--------|--------|---------|---------|---------|---------|---------|---------|---------|---------|
| <b>m<sup>3</sup>/day</b>   | 7.5*   | 14     | 14     | 20     | 35      | 35      | 50      | 50      | 70      | 70      | 120     | 120     |
| <b>m<sup>3</sup>/year</b>  | 2,738* | 5,110  | 5,110  | 7,300  | 12,775  | 12,775  | 18,250  | 18,250  | 25,550  | 25,550  | 43,800  | 43,800  |
| [Borehole]                 | 4,879  | 11,932 | 11,932 | 11,932 | 18,328  | 18,328  | 18,328  | 18,328  | 18,328  | 18,328  | 18,328  | 18,328  |
| [Site]                     | 289    | 3,740  | 6,127  | 6,127  | 16,265  | 18,652  | 18,652  | 18,652  | 21,757  | 24,144  | 24,144  | 24,144  |
| Generator plinth           | -      | -      | -      | -      | -       | 13%     | 13%     | 13%     | -       | 10%     | 10%     | 10%     |
| [Pump]                     | 1,266  | 8,481  | 15,651 | 15,651 | 48,769  | 34,486  | 59,378  | 34,486  | 78,629  | 45,038  | 98,022  | 45,038  |
| Pump                       | -      | 49%    | 27%    | 27%    | 19%     | 27%     | 16%     | 27%     | 15%     | 26%     | 12%     | 26%     |
| Solar panel                | -      | 14%    | -      | -      | 15%     | -       | 12%     | -       | 30%     | -       | 24%     | -       |
| Structure for solar panels | -      | 23%    | -      | -      | 6%      | -       | 5%      | -       | 12%     | -       | 10%     | -       |
| Generator                  | -      | -      | 55%    | 55%    | -       | 26%     | 15%     | 26%     | -       | 36%     | 16%     | 36%     |
| [Distribution]             | 0      | 24,769 | 24,769 | 27,652 | 105,619 | 105,619 | 138,400 | 138,400 | 137,892 | 137,892 | 201,355 | 201,355 |
| Pipes excavation           | -      | 6%     | 6%     | 8%     | 22%     | 22%     | 29%     | 29%     | 31%     | 31%     | 24%     |         |
| Pipes supply               | -      | 24%    | 24%    | 31%    | 33%     | 33%     | 37%     | 37%     | 35%     | 35%     | 42%     |         |
| Storage tank & structure   | -      | 68%    | 68%    | 61%    | 34%     | 34%     | 26%     | 26%     | 31%     | 31%     | 21%     |         |
| <b>TOT Capex</b>           | 6,433  | 48,922 | 58,479 | 61,362 | 188,982 | 177,086 | 234,759 | 209,867 | 256,606 | 225,402 | 341,850 | 288,865 |

Table 15: Detailed analysis of the capital expenditures of the motorised systems with a pumping yield of 25 and 50 m<sup>3</sup>/h and of the water trucking

|                           | 25_S   | 25_Ds  | 25_H    | 25_DI   | 50_S    | 50_Ds   | 50_H    | 50_DI   | 50_S2   | 50_Ds2  | 50_H2   | 50_DI2  | Truck (1) |
|---------------------------|--------|--------|---------|---------|---------|---------|---------|---------|---------|---------|---------|---------|-----------|
| <b>m<sup>3</sup>/day</b>  | 175    | 175    | 300     | 300     | 350     | 350     | 600     | 600     | 350     | 350     | 600     | 600     | 300       |
| <b>m<sup>3</sup>/year</b> | 63,875 | 63,875 | 109,500 | 109,500 | 127,750 | 127,750 | 219,000 | 219,000 | 127,750 | 127,750 | 219,000 | 219,000 | 109,500   |
| [Borehole]                | 22,832 | 22,832 | 22,832  | 22,832  | 22,832  | 22,832  | 22,832  | 22,832  | 22,832  | 22,832  | 22,832  | 22,832  | 22,832    |
| [Site]                    | 36,235 | 38,622 | 38,622  | 38,622  | 36,235  | 38,622  | 38,622  | 38,622  | 36,235  | 38,622  | 38,622  | 38,622  | 38,622    |

# A MULTI-CRITERIA ASSESSMENT OF WATER SUPPLY IN UGANDAN REFUGEE SETTLEMENTS

## Supporting information

|                            |         |         |         |         |         |         |         |         |         |         |         |         |         |
|----------------------------|---------|---------|---------|---------|---------|---------|---------|---------|---------|---------|---------|---------|---------|
| Generator plinth           | -       | 6%      | 6%      | 6%      | -       | 6%      | 6%      | 6%      | -       | 6%      | 6%      | 6%      | 6%      |
| [Pump]                     | 130,862 | 66,552  | 157,571 | 66,552  | 239,168 | 110,541 | 268,504 | 110,541 | 232,015 | 102,143 | 261,352 | 102,143 | 66,552  |
| Pump                       | 19%     | 37%     | 15%     | 37%     | 13%     | 29%     | 12%     | 29%     | 16%     | 37%     | 15%     | 37%     | 37%     |
| Solar panel                | 36%     | -       | 30%     | -       | 31%     | -       | 27%     | -       | 32%     | -       | 28%     | -       | -       |
| Structure for solar panels | 14%     | -       | 12%     | -       | 12%     | -       | 11%     | -       | 13%     | -       | 11%     | -       | -       |
| Generator                  | -       | 36%     | 15%     | 36%     | -       | 24%     | 10%     | 24%     | -       | 26%     | 10%     | 26%     | 36%     |
| [Distribution]             | 196,592 | 196,592 | 285,627 | 285,627 | 293,270 | 293,270 | 504,369 | 504,369 | 216,958 | 216,958 | 370,729 | 370,729 | -       |
| Pipes excavation           | 11%     | 11%     | 13%     | 13%     | 11%     | 11%     | 11%     | 11%     | 6%      | 6%      | 6%      | 6%      |         |
| Pipes supply               | 36%     | 36%     | 31%     | 31%     | 49%     | 49%     | 49%     | 49%     | 45%     | 45%     | 45%     | 45%     |         |
| Storage tank               | 37%     | 37%     | 30%     | 30%     | 29%     | 29%     | 29%     | 29%     | 39%     | 39%     | 39%     | 39%     |         |
| <b>TOT Capex</b>           | 386,521 | 324,597 | 504,652 | 413,632 | 591,504 | 465,264 | 834,327 | 676,364 | 508,040 | 380,555 | 693,534 | 534,326 | 128,005 |

## Supporting information

SM A.15 Results of the LCC: unit cost [USD / m<sup>3</sup>] of all the alternatives

Table 16, Table 17 and Table 18 illustrate the unit costs per m<sup>3</sup> of water delivered in all the systems with a discount rate of 0%, 6% and 12%. The costs include CAPEX and OPEX for all the timeframes. To be noted that these are cumulative unit cost: at the year 3 the values indicate how much each m<sup>3</sup> of water produced in the 3 years should cost to have full cost recovery of all the expenditures happened in the first 3 years; at the year 10 the values indicate how much each m<sup>3</sup> of water produced in 10 years should cost to obtain full cost recovery of all the expenditures happening in the 10 years.

Table 16: Costs in USD/m<sup>3</sup> of water for all the alternatives calculated with a discount rate of 0%. When the cells of Ds (only diesel-powered systems running for 7 hours per day) are green, it indicates that the system is more expensive than the only solar-powered systems. When the cells of DI (only diesel-powered systems running for 10/12 hours per day) are green, it indicates that the system becomes more expensive than the only solar system. When the cells of DI (only diesel-powered systems running for 10/12 hours per day) are green, it indicates that the system becomes more expensive than the hybrid systems.

|    | HP   | 2_S   | 2_Ds  | 2_DI | 5_S   | 5_Ds  | 5_H   | 5_DI  | 10_S  | 10_Ds | 10_H | 10_DI | 25_S | 25_Ds | 25_H | 25_DI | 50_S | 50_Ds | 50_H | 50_DI | 50_S2 | 50_Ds2 | 50_H2 | 50_DI2 | Truck (1) | Truck (2) |
|----|------|-------|-------|------|-------|-------|-------|-------|-------|-------|------|-------|------|-------|------|-------|------|-------|------|-------|-------|--------|-------|--------|-----------|-----------|
| 1  | 2.53 | 10.38 | 12.95 | 9.67 | 15.14 | 14.49 | 13.21 | 12.03 | 10.40 | 9.53  | 8.17 | 7.16  | 6.21 | 5.60  | 4.86 | 4.24  | 4.72 | 3.97  | 3.97 | 3.39  | 4.08  | 3.31   | 3.33  | 2.74   | 8.37      | 6.74      |
| 2  | 1.50 | 5.60  | 7.48  | 5.65 | 7.75  | 7.66  | 6.78  | 6.35  | 5.38  | 5.12  | 4.27 | 3.93  | 3.19 | 3.06  | 2.56 | 2.38  | 2.41 | 2.15  | 2.07 | 1.86  | 2.09  | 1.82   | 1.75  | 1.54   | 7.82      | 6.74      |
| 3  | 1.22 | 4.00  | 5.49  | 4.31 | 5.28  | 5.32  | 4.63  | 4.46  | 3.70  | 3.72  | 2.97 | 2.81  | 2.18 | 2.25  | 1.79 | 1.74  | 1.64 | 1.57  | 1.43 | 1.34  | 1.42  | 1.35   | 1.22  | 1.12   | 7.62      | 6.74      |
| 4  | 1.03 | 3.20  | 4.62  | 3.55 | 4.05  | 4.20  | 3.56  | 3.48  | 2.86  | 2.96  | 2.32 | 2.28  | 1.68 | 1.82  | 1.41 | 1.44  | 1.25 | 1.26  | 1.12 | 1.09  | 1.09  | 1.09   | 0.96  | 0.93   | 7.53      | 6.74      |
| 5  | 0.86 | 2.72  | 4.00  | 3.38 | 3.31  | 3.48  | 2.99  | 3.02  | 2.36  | 2.51  | 1.98 | 1.96  | 1.37 | 1.56  | 1.22 | 1.27  | 1.02 | 1.07  | 0.95 | 0.95  | 0.89  | 0.94   | 0.82  | 0.82   | 7.49      | 6.74      |
| 6  | 0.88 | 2.40  | 3.86  | 3.09 | 2.81  | 3.12  | 2.55  | 2.63  | 2.03  | 2.24  | 1.71 | 1.79  | 1.17 | 1.40  | 1.06 | 1.17  | 0.87 | 0.96  | 0.82 | 0.86  | 0.76  | 0.85   | 0.71  | 0.75   | 7.48      | 6.74      |
| 7  | 0.78 | 2.27  | 3.58  | 2.88 | 2.54  | 2.80  | 2.26  | 2.35  | 1.81  | 2.02  | 1.53 | 1.63  | 1.04 | 1.28  | 0.95 | 1.07  | 0.78 | 0.87  | 0.74 | 0.78  | 0.69  | 0.78   | 0.64  | 0.69   | 7.44      | 6.74      |
| 8  | 0.74 | 2.09  | 3.38  | 2.68 | 2.26  | 2.56  | 2.02  | 2.12  | 1.65  | 1.88  | 1.38 | 1.51  | 0.96 | 1.21  | 0.86 | 1.00  | 0.72 | 0.82  | 0.67 | 0.72  | 0.64  | 0.74   | 0.58  | 0.64   | 7.42      | 6.74      |
| 9  | 0.73 | 1.95  | 3.18  | 2.65 | 2.05  | 2.34  | 1.84  | 2.00  | 1.51  | 1.78  | 1.28 | 1.41  | 0.87 | 1.14  | 0.80 | 0.94  | 0.65 | 0.77  | 0.62 | 0.68  | 0.58  | 0.70   | 0.54  | 0.61   | 7.40      | 6.74      |
| 10 | 0.70 | 1.83  | 3.06  | 2.58 | 1.88  | 2.19  | 1.72  | 1.89  | 1.39  | 1.74  | 1.20 | 1.34  | 0.80 | 1.12  | 0.76 | 0.91  | 0.59 | 0.75  | 0.58 | 0.65  | 0.53  | 0.69   | 0.51  | 0.59   | 7.40      | 6.74      |

Table 17: Costs in USD/m<sup>3</sup> of water for all the alternatives calculated with a discount rate of 6%. When the cells of Ds (only diesel-powered systems running for 7 hours per day) are green, it indicates that the system is more expensive than the only solar-powered systems. When the cells of DI (only diesel-powered systems running for 10/12 hours per day) are green, it indicates that the system becomes more expensive than the only solar system. When the cells of DI (only diesel-powered systems running for 10/12 hours per day) are green, it indicates that the system becomes more expensive than the hybrid systems.

|   | HP   | 2_S   | 2_Ds  | 2_DI | 5_S   | 5_Ds  | 5_H   | 5_DI  | 10_S  | 10_Ds | 10_H | 10_DI | 25_S | 25_Ds | 25_H | 25_DI | 50_S | 50_Ds | 50_H | 50_DI | 50_S2 | 50_Ds2 | 50_H2 | 50_DI2 | Truck (1) | Truck (2) |
|---|------|-------|-------|------|-------|-------|-------|-------|-------|-------|------|-------|------|-------|------|-------|------|-------|------|-------|-------|--------|-------|--------|-----------|-----------|
| 1 | 2.53 | 10.38 | 12.95 | 9.67 | 15.14 | 14.49 | 13.21 | 12.03 | 10.40 | 9.53  | 8.17 | 7.16  | 6.21 | 5.60  | 4.86 | 4.24  | 4.72 | 3.97  | 3.97 | 3.39  | 4.08  | 3.31   | 3.33  | 2.74   | 8.37      | 6.74      |
| 2 | 1.53 | 5.73  | 7.64  | 5.76 | 7.96  | 7.86  | 6.96  | 6.52  | 5.52  | 5.24  | 4.38 | 4.02  | 3.28 | 3.13  | 2.63 | 2.44  | 2.48 | 2.20  | 2.12 | 1.91  | 2.15  | 1.86   | 1.79  | 1.57   | 7.84      | 6.36      |
| 3 | 1.25 | 4.19  | 5.71  | 4.46 | 5.57  | 5.59  | 4.88  | 4.68  | 3.90  | 3.88  | 3.12 | 2.93  | 2.30 | 2.35  | 1.88 | 1.82  | 1.73 | 1.64  | 1.51 | 1.40  | 1.50  | 1.40   | 1.28  | 1.17   | 7.64      | 6.00      |
| 4 | 1.08 | 3.42  | 4.87  | 3.73 | 4.38  | 4.50  | 3.85  | 3.73  | 3.09  | 3.16  | 2.49 | 2.42  | 1.81 | 1.93  | 1.51 | 1.52  | 1.36 | 1.34  | 1.20 | 1.16  | 1.18  | 1.16   | 1.03  | 0.98   | 7.56      | 5.66      |
| 5 | 0.92 | 2.95  | 4.27  | 3.55 | 3.66  | 3.82  | 3.29  | 3.28  | 2.60  | 2.72  | 2.16 | 2.11  | 1.52 | 1.68  | 1.32 | 1.35  | 1.13 | 1.16  | 1.04 | 1.02  | 0.99  | 1.01   | 0.90  | 0.87   | 7.51      | 5.34      |
| 6 | 0.92 | 2.65  | 4.12  | 3.28 | 3.19  | 3.46  | 2.87  | 2.91  | 2.28  | 2.46  | 1.90 | 1.95  | 1.32 | 1.53  | 1.17 | 1.26  | 0.98 | 1.05  | 0.92 | 0.93  | 0.86  | 0.92   | 0.79  | 0.81   | 7.50      | 5.04      |

# A MULTI-CRITERIA ASSESSMENT OF WATER SUPPLY IN UGANDAN REFUGEE SETTLEMENTS

## Supporting information

|    |      |      |      |      |      |      |      |      |      |      |      |      |      |      |      |      |      |      |      |      |      |      |      |      |      |      |
|----|------|------|------|------|------|------|------|------|------|------|------|------|------|------|------|------|------|------|------|------|------|------|------|------|------|------|
| 7  | 0.83 | 2.51 | 3.85 | 3.08 | 2.91 | 3.15 | 2.59 | 2.64 | 2.07 | 2.25 | 1.73 | 1.79 | 1.20 | 1.41 | 1.07 | 1.16 | 0.90 | 0.96 | 0.84 | 0.86 | 0.79 | 0.85 | 0.72 | 0.75 | 7.47 | 4.75 |
| 8  | 0.80 | 2.34 | 3.67 | 2.90 | 2.65 | 2.92 | 2.36 | 2.43 | 1.91 | 2.12 | 1.59 | 1.68 | 1.11 | 1.34 | 0.98 | 1.10 | 0.83 | 0.92 | 0.77 | 0.81 | 0.74 | 0.81 | 0.66 | 0.71 | 7.45 | 4.49 |
| 9  | 0.78 | 2.20 | 3.48 | 2.86 | 2.45 | 2.72 | 2.19 | 2.31 | 1.78 | 2.01 | 1.49 | 1.58 | 1.03 | 1.28 | 0.93 | 1.04 | 0.77 | 0.87 | 0.72 | 0.76 | 0.68 | 0.78 | 0.62 | 0.67 | 7.43 | 4.23 |
| 10 | 0.76 | 2.10 | 3.37 | 2.78 | 2.29 | 2.58 | 2.08 | 2.20 | 1.67 | 1.97 | 1.42 | 1.52 | 0.97 | 1.25 | 0.89 | 1.01 | 0.72 | 0.85 | 0.69 | 0.74 | 0.64 | 0.76 | 0.59 | 0.65 | 7.42 | 3.99 |

Table 18: Costs in USD/m<sup>3</sup> of water for all the alternatives calculated with a discount rate of 12%. When the cells of Ds (only diesel-powered systems running for 7 hours per day) are green, it indicates that the system is more expensive than the only solar-powered systems. When the cells of DI (only diesel-powered systems running for 10/12 hours per day) are green, it indicates that the system becomes more expensive than the only solar system. When the cells of DI (only diesel-powered systems running for 10/12 hours per day) are green, it indicates that the system becomes more expensive than the hybrid systems.

|    | HP   | 2_S   | 2_Ds  | 2_DI | 5_S   | 5_Ds  | 5_H   | 5_DI  | 10_S  | 10_Ds | 10_H | 10_DI | 25_S | 25_Ds | 25_H | 25_DI | 50_S | 50_Ds | 50_H | 50_DI | 50_S2 | 50_Ds2 | 50_H2 | 50_DI2 | Truck (1) | Truck (2) |
|----|------|-------|-------|------|-------|-------|-------|-------|-------|-------|------|-------|------|-------|------|-------|------|-------|------|-------|-------|--------|-------|--------|-----------|-----------|
| 1  | 2.53 | 10.38 | 12.95 | 9.67 | 15.14 | 14.49 | 13.21 | 12.03 | 10.40 | 9.53  | 8.17 | 7.16  | 6.21 | 5.60  | 4.86 | 4.24  | 4.72 | 3.97  | 3.97 | 3.39  | 4.08  | 3.31   | 3.33  | 2.74   | 8.37      | 6.74      |
| 2  | 1.56 | 5.87  | 7.79  | 5.87 | 8.16  | 8.05  | 7.14  | 6.67  | 5.66  | 5.37  | 4.49 | 4.11  | 3.36 | 3.20  | 2.69 | 2.49  | 2.54 | 2.25  | 2.18 | 1.95  | 2.20  | 1.90   | 1.84  | 1.60   | 7.85      | 6.02      |
| 3  | 1.29 | 4.37  | 5.93  | 4.61 | 5.85  | 5.85  | 5.13  | 4.90  | 4.09  | 4.05  | 3.27 | 3.06  | 2.41 | 2.44  | 1.97 | 1.89  | 1.82 | 1.70  | 1.58 | 1.46  | 1.58  | 1.46   | 1.34  | 1.22   | 7.66      | 5.38      |
| 4  | 1.12 | 3.62  | 5.11  | 3.91 | 4.70  | 4.80  | 4.13  | 3.98  | 3.31  | 3.35  | 2.66 | 2.56  | 1.94 | 2.04  | 1.61 | 1.60  | 1.46 | 1.42  | 1.28 | 1.22  | 1.27  | 1.22   | 1.10  | 1.03   | 7.58      | 4.80      |
| 5  | 0.97 | 3.18  | 4.54  | 3.73 | 4.01  | 4.14  | 3.59  | 3.54  | 2.84  | 2.93  | 2.34 | 2.27  | 1.66 | 1.80  | 1.43 | 1.44  | 1.24 | 1.25  | 1.13 | 1.09  | 1.08  | 1.08   | 0.97  | 0.93   | 7.54      | 4.29      |
| 6  | 0.97 | 2.89  | 4.38  | 3.47 | 3.56  | 3.80  | 3.19  | 3.19  | 2.53  | 2.68  | 2.10 | 2.11  | 1.48 | 1.66  | 1.28 | 1.35  | 1.10 | 1.14  | 1.01 | 1.01  | 0.96  | 1.00   | 0.87  | 0.87   | 7.53      | 3.83      |
| 7  | 0.89 | 2.75  | 4.13  | 3.28 | 3.29  | 3.51  | 2.93  | 2.94  | 2.33  | 2.49  | 1.93 | 1.96  | 1.36 | 1.54  | 1.19 | 1.26  | 1.02 | 1.06  | 0.94 | 0.94  | 0.90  | 0.93   | 0.80  | 0.81   | 7.49      | 3.42      |
| 8  | 0.86 | 2.59  | 3.96  | 3.12 | 3.05  | 3.29  | 2.72  | 2.74  | 2.19  | 2.36  | 1.80 | 1.86  | 1.28 | 1.48  | 1.11 | 1.20  | 0.96 | 1.01  | 0.87 | 0.89  | 0.84  | 0.89   | 0.75  | 0.77   | 7.48      | 3.05      |
| 9  | 0.84 | 2.47  | 3.79  | 3.07 | 2.87  | 3.11  | 2.56  | 2.63  | 2.06  | 2.26  | 1.72 | 1.77  | 1.20 | 1.42  | 1.06 | 1.15  | 0.90 | 0.97  | 0.83 | 0.85  | 0.79  | 0.86   | 0.71  | 0.74   | 7.46      | 2.72      |
| 10 | 0.82 | 2.38  | 3.69  | 3.01 | 2.73  | 2.98  | 2.45  | 2.53  | 1.96  | 2.21  | 1.65 | 1.72  | 1.14 | 1.39  | 1.02 | 1.12  | 0.85 | 0.95  | 0.80 | 0.83  | 0.75  | 0.84   | 0.69  | 0.72   | 7.45      | 2.43      |

## SM A.16 Results of the LCC: unit costs [USD/m<sup>3</sup>], economy of scale

Figure 20, Figure 21, Figure 22 and Figure 23 shows the unit cost [USD/m<sup>3</sup>] including CAPEX and OPEX for all the solar powers systems, short running diesel powered systems (7 hours a day), hybrid systems and long-running diesel powered systems (10/12 hours per day) for all the timeframes with a discount rate: 0%.

The costs include CAPEX and OPEX for all the timeframes. To be noted that these are cumulative unit cost: at the year 3 the values indicate how much each m<sup>3</sup> of water produced in the 3 years should cost to have full cost recovery of all the expenditures happened in the first 3 years; at the year 10 the values indicate how much each m<sup>3</sup> of water produced in 10 years should cost to obtain full cost recovery of all the expenditures happening in the 10 years.

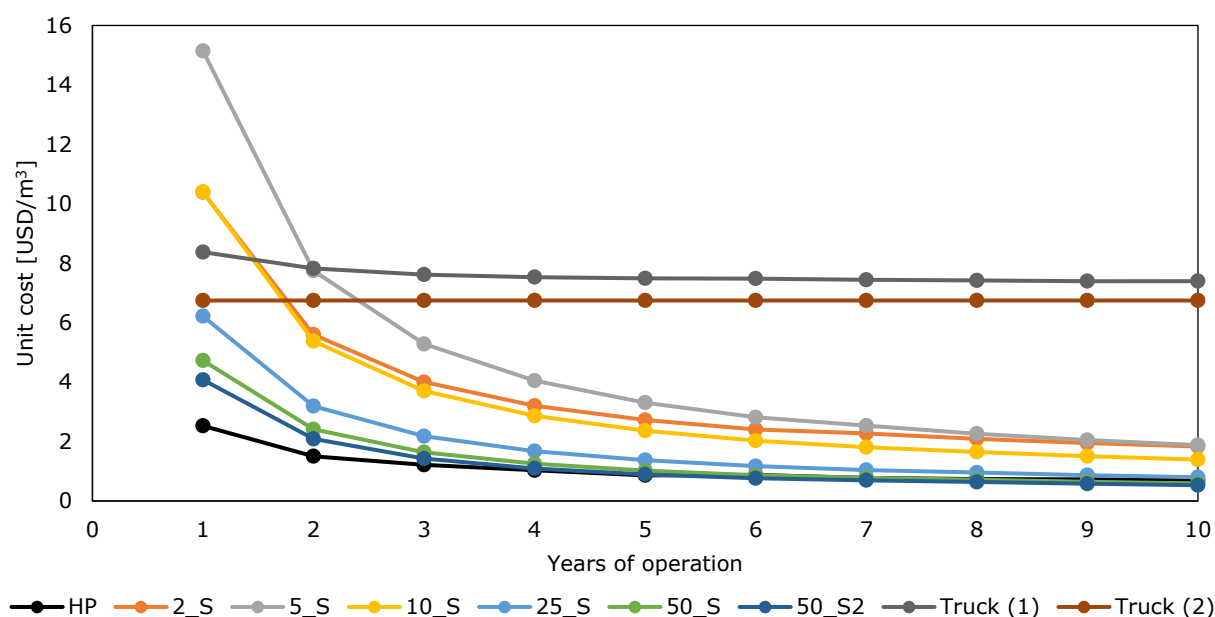

Figure 20: Costs in USD / m<sup>3</sup> for all the alternatives with a solar powered system (running for 7 hours), hand pump and water trucking

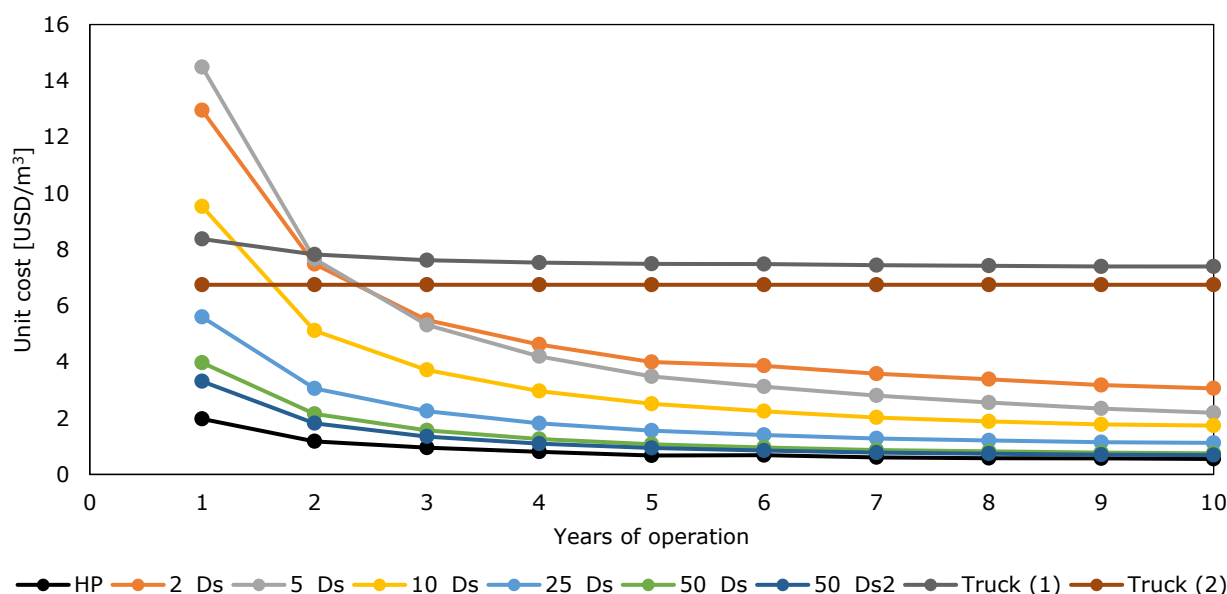

Figure 21: Costs in USD / m<sup>3</sup> for all the alternatives with a diesel-powered system running for 7 hours, hand pump and water trucking

Supporting information

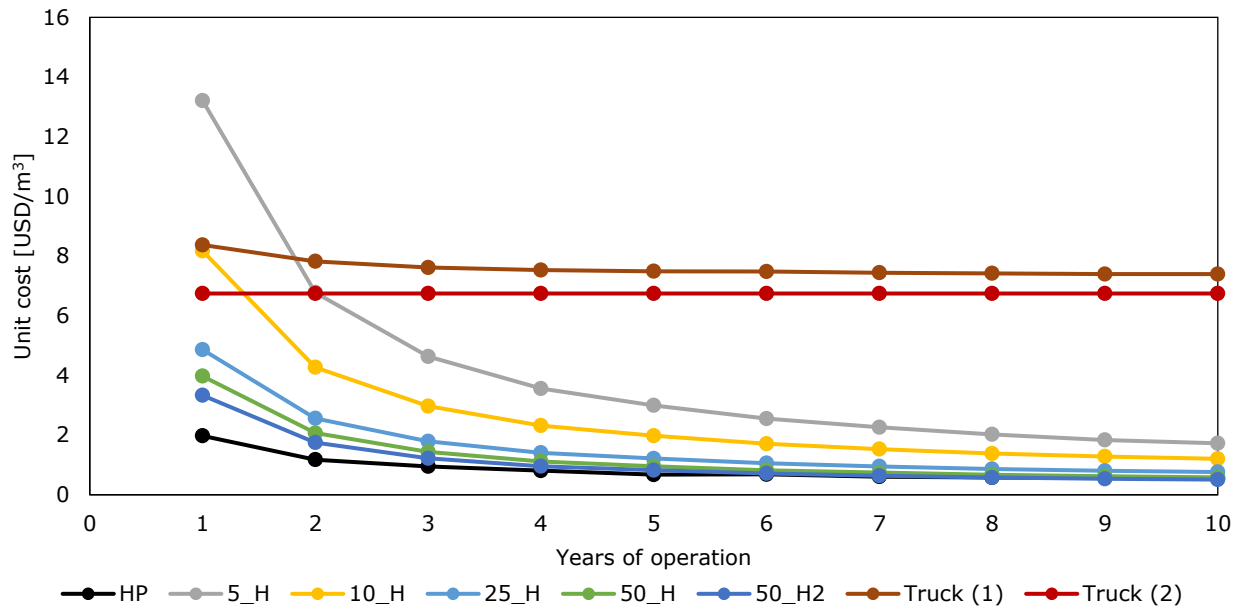

Figure 22: Costs in USD / m<sup>3</sup> for all the alternatives with a hybrid-powered system (solar + diesel) running for 10 hours (2 and 5 m<sup>3</sup>/h) and 12 hours (for the other), hand pump and water trucking

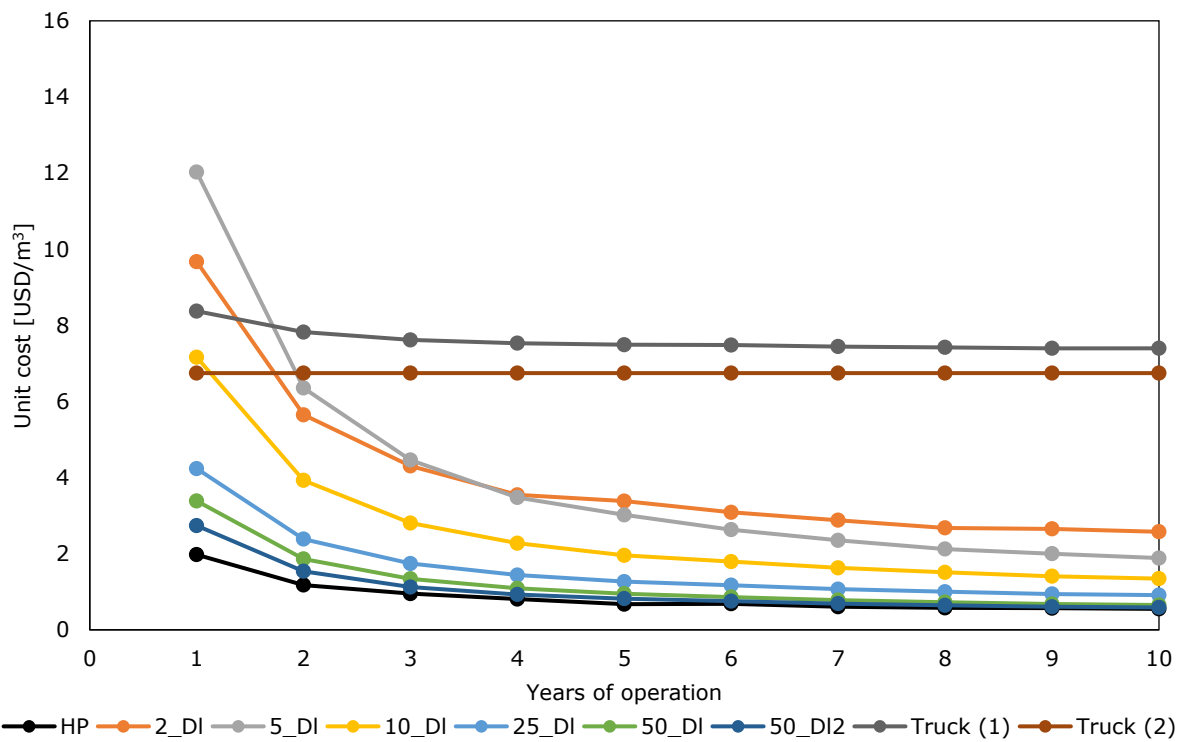

Figure 23: Costs in USD / m<sup>3</sup> for all the alternatives with a diesel-powered system running for 10 hours (2 and 5 m<sup>3</sup>/h) and 12 hours (for the other), hand pump and water trucking



## Supporting information

SM A.17 Results of the LCC: O&M unit costs [USD/m<sup>3</sup>]

Table 19, Table 20 and Table 21 illustrate the Operation and maintenance costs (O&M) per m<sup>3</sup> of water delivered in all the systems with a discount rate of 0%, 6% and 10%, respectively. It can be seen that the solar-powered system is almost always the cheaper option, followed by the hybrid systems, the diesel-powered system running for 10/12 hours per day and lastly the diesel-powered system running for only 7 hours per day.

To be noted that these are cumulative unit cost: at the year 3 the values indicate how much each m<sup>3</sup> of water produced in the 3 years should cost to have full cost recovery of all the O&M (operation expenditures) happened in the first 3 years; at the year 10 the values indicate how much each m<sup>3</sup> of water produced in 10 years should cost to obtain full cost recovery of all the O&M happening in the 10 years.

Table 19: O&M costs in USD/m<sup>3</sup> of water for all the alternatives calculated with a discount rate of 0%. The colours show which one of the power systems (solar, short-running diesel, hybrid and long-running diesel) is cheaper fixed the pumping yield and the timeframe. Green is the cheapest and yellow the most expensive.

|    | HP   | 2_S  | 2_Ds | 2_DI | 5_S  | 5_Ds | 5_H  | 5_DI | 10_S | 10_Ds | 10_H | 10_DI | 25_S | 25_Ds | 25_H | 25_DI | 50_S | 50_Ds | 50_H | 50_DI | 50_S2 | 50_Ds2 | 50_H2 | 50_DI2 |
|----|------|------|------|------|------|------|------|------|------|-------|------|-------|------|-------|------|-------|------|-------|------|-------|-------|--------|-------|--------|
| 1  | 0.18 | 0.81 | 1.50 | 1.27 | 0.35 | 0.63 | 0.34 | 0.53 | 0.35 | 0.71  | 0.37 | 0.57  | 0.16 | 0.52  | 0.25 | 0.46  | 0.09 | 0.33  | 0.16 | 0.30  | 0.10  | 0.33   | 0.16  | 0.30   |
| 2  | 0.33 | 0.81 | 1.76 | 1.44 | 0.35 | 0.73 | 0.34 | 0.60 | 0.35 | 0.71  | 0.37 | 0.63  | 0.16 | 0.52  | 0.25 | 0.49  | 0.09 | 0.33  | 0.16 | 0.32  | 0.10  | 0.33   | 0.16  | 0.32   |
| 3  | 0.43 | 0.81 | 1.67 | 1.50 | 0.35 | 0.70 | 0.34 | 0.63 | 0.35 | 0.77  | 0.37 | 0.61  | 0.16 | 0.56  | 0.25 | 0.48  | 0.09 | 0.35  | 0.16 | 0.31  | 0.10  | 0.35   | 0.16  | 0.31   |
| 4  | 0.45 | 0.81 | 1.76 | 1.44 | 0.35 | 0.73 | 0.34 | 0.60 | 0.35 | 0.76  | 0.37 | 0.63  | 0.16 | 0.55  | 0.25 | 0.49  | 0.09 | 0.35  | 0.16 | 0.32  | 0.10  | 0.35   | 0.16  | 0.32   |
| 5  | 0.39 | 0.81 | 1.71 | 1.70 | 0.35 | 0.71 | 0.42 | 0.72 | 0.35 | 0.75  | 0.42 | 0.64  | 0.16 | 0.54  | 0.29 | 0.51  | 0.09 | 0.34  | 0.19 | 0.33  | 0.10  | 0.34   | 0.19  | 0.33   |
| 6  | 0.48 | 0.81 | 1.96 | 1.69 | 0.35 | 0.81 | 0.41 | 0.71 | 0.35 | 0.77  | 0.41 | 0.69  | 0.16 | 0.56  | 0.29 | 0.54  | 0.09 | 0.35  | 0.19 | 0.35  | 0.10  | 0.35   | 0.19  | 0.35   |
| 7  | 0.44 | 0.91 | 1.95 | 1.68 | 0.42 | 0.82 | 0.42 | 0.71 | 0.37 | 0.76  | 0.41 | 0.69  | 0.18 | 0.55  | 0.29 | 0.53  | 0.12 | 0.35  | 0.20 | 0.34  | 0.13  | 0.35   | 0.18  | 0.34   |
| 8  | 0.45 | 0.89 | 1.95 | 1.63 | 0.41 | 0.82 | 0.41 | 0.69 | 0.39 | 0.78  | 0.41 | 0.69  | 0.20 | 0.57  | 0.29 | 0.53  | 0.14 | 0.37  | 0.19 | 0.34  | 0.14  | 0.37   | 0.18  | 0.34   |
| 9  | 0.47 | 0.88 | 1.90 | 1.72 | 0.41 | 0.80 | 0.41 | 0.72 | 0.39 | 0.80  | 0.42 | 0.67  | 0.20 | 0.58  | 0.29 | 0.52  | 0.13 | 0.37  | 0.20 | 0.33  | 0.14  | 0.37   | 0.18  | 0.33   |
| 10 | 0.47 | 0.88 | 1.92 | 1.73 | 0.40 | 0.81 | 0.44 | 0.74 | 0.39 | 0.86  | 0.42 | 0.69  | 0.19 | 0.61  | 0.30 | 0.53  | 0.13 | 0.39  | 0.20 | 0.34  | 0.13  | 0.39   | 0.19  | 0.34   |

## Supporting information

Table 20: O&M costs in USD/m<sup>3</sup> of water for all the alternatives calculated with a discount rate of 6%. The colours show which one of the power systems (solar, short-running diesel, hybrid and long-running diesel) is cheaper fixed the pumping yield and the timeframe. Green is the cheapest and yellow the most expensive.

|    | HP   | 2_S  | 2_Ds | 2_DI | 5_S  | 5_Ds | 5_H  | 5_DI | 10_S | 10_Ds | 10_H | 10_DI | 25_S | 25_Ds | 25_H | 25_DI | 50_S | 50_Ds | 50_H | 50_DI | 50_S2 | 50_Ds <sub>2</sub> | 50_H2 | 50_DI2 |
|----|------|------|------|------|------|------|------|------|------|-------|------|-------|------|-------|------|-------|------|-------|------|-------|-------|--------------------|-------|--------|
| 1  | 0.18 | 0.81 | 1.50 | 1.27 | 0.35 | 0.63 | 0.34 | 0.53 | 0.35 | 0.71  | 0.37 | 0.57  | 0.16 | 0.52  | 0.25 | 0.46  | 0.09 | 0.33  | 0.16 | 0.30  | 0.10  | 0.33               | 0.16  | 0.30   |
| 2  | 0.33 | 0.81 | 1.75 | 1.44 | 0.35 | 0.73 | 0.34 | 0.60 | 0.35 | 0.71  | 0.37 | 0.63  | 0.16 | 0.52  | 0.25 | 0.49  | 0.09 | 0.33  | 0.16 | 0.32  | 0.10  | 0.33               | 0.16  | 0.32   |
| 3  | 0.42 | 0.81 | 1.67 | 1.50 | 0.35 | 0.70 | 0.34 | 0.62 | 0.35 | 0.77  | 0.37 | 0.61  | 0.16 | 0.55  | 0.25 | 0.48  | 0.09 | 0.35  | 0.16 | 0.31  | 0.10  | 0.35               | 0.16  | 0.31   |
| 4  | 0.44 | 0.81 | 1.75 | 1.44 | 0.35 | 0.73 | 0.34 | 0.60 | 0.35 | 0.76  | 0.37 | 0.63  | 0.16 | 0.55  | 0.25 | 0.49  | 0.09 | 0.35  | 0.16 | 0.32  | 0.10  | 0.35               | 0.16  | 0.32   |
| 5  | 0.39 | 0.81 | 1.71 | 1.67 | 0.35 | 0.71 | 0.41 | 0.71 | 0.35 | 0.75  | 0.41 | 0.63  | 0.16 | 0.54  | 0.29 | 0.51  | 0.09 | 0.34  | 0.19 | 0.33  | 0.10  | 0.34               | 0.19  | 0.33   |
| 6  | 0.47 | 0.81 | 1.92 | 1.66 | 0.35 | 0.80 | 0.40 | 0.70 | 0.35 | 0.77  | 0.40 | 0.68  | 0.16 | 0.55  | 0.28 | 0.53  | 0.09 | 0.35  | 0.18 | 0.34  | 0.10  | 0.35               | 0.18  | 0.34   |
| 7  | 0.44 | 0.89 | 1.92 | 1.66 | 0.41 | 0.81 | 0.42 | 0.70 | 0.37 | 0.76  | 0.41 | 0.68  | 0.17 | 0.55  | 0.29 | 0.53  | 0.12 | 0.35  | 0.20 | 0.34  | 0.12  | 0.35               | 0.18  | 0.34   |
| 8  | 0.44 | 0.88 | 1.93 | 1.62 | 0.40 | 0.81 | 0.41 | 0.68 | 0.39 | 0.78  | 0.40 | 0.68  | 0.19 | 0.57  | 0.28 | 0.53  | 0.13 | 0.36  | 0.19 | 0.34  | 0.13  | 0.36               | 0.18  | 0.34   |
| 9  | 0.46 | 0.87 | 1.89 | 1.69 | 0.40 | 0.80 | 0.40 | 0.71 | 0.38 | 0.79  | 0.41 | 0.67  | 0.19 | 0.57  | 0.29 | 0.52  | 0.13 | 0.37  | 0.19 | 0.33  | 0.13  | 0.37               | 0.18  | 0.33   |
| 10 | 0.46 | 0.87 | 1.90 | 1.71 | 0.40 | 0.80 | 0.43 | 0.72 | 0.38 | 0.83  | 0.42 | 0.68  | 0.19 | 0.60  | 0.30 | 0.53  | 0.12 | 0.38  | 0.20 | 0.34  | 0.13  | 0.38               | 0.19  | 0.34   |

Table 21: O&M costs in USD/m<sup>3</sup> of water for all the alternatives calculated with a discount rate of 12%. The colours show which one of the power systems (solar, short-running diesel, hybrid and long-running diesel) is cheaper fixed the pumping yield and the timeframe. Green is the cheapest and yellow the most expensive.

|    | HP   | 2_S  | 2_Ds | 2_DI | 5_S  | 5_Ds | 5_H  | 5_DI | 10_S | 10_Ds | 10_H | 10_DI | 25_S | 25_Ds | 25_H | 25_DI | 50_S | 50_Ds | 50_H | 50_DI | 50_S2 | 50_Ds <sub>2</sub> | 50_H <sub>2</sub> | 50_DI <sub>2</sub> |
|----|------|------|------|------|------|------|------|------|------|-------|------|-------|------|-------|------|-------|------|-------|------|-------|-------|--------------------|-------------------|--------------------|
| 1  | 0.18 | 0.81 | 1.50 | 1.27 | 0.35 | 0.63 | 0.34 | 0.53 | 0.35 | 0.71  | 0.37 | 0.57  | 0.16 | 0.52  | 0.25 | 0.46  | 0.09 | 0.33  | 0.16 | 0.30  | 0.10  | 0.33               | 0.16              | 0.30               |
| 2  | 0.32 | 0.81 | 1.74 | 1.43 | 0.35 | 0.73 | 0.34 | 0.60 | 0.35 | 0.71  | 0.37 | 0.62  | 0.16 | 0.52  | 0.25 | 0.49  | 0.09 | 0.33  | 0.16 | 0.32  | 0.10  | 0.33               | 0.16              | 0.32               |
| 3  | 0.42 | 0.81 | 1.67 | 1.49 | 0.35 | 0.70 | 0.34 | 0.62 | 0.35 | 0.77  | 0.37 | 0.61  | 0.16 | 0.55  | 0.25 | 0.48  | 0.09 | 0.35  | 0.16 | 0.31  | 0.10  | 0.35               | 0.16              | 0.31               |
| 4  | 0.43 | 0.81 | 1.74 | 1.44 | 0.35 | 0.73 | 0.34 | 0.60 | 0.35 | 0.75  | 0.37 | 0.62  | 0.16 | 0.55  | 0.25 | 0.49  | 0.09 | 0.35  | 0.16 | 0.32  | 0.10  | 0.35               | 0.16              | 0.32               |
| 5  | 0.39 | 0.81 | 1.71 | 1.64 | 0.35 | 0.71 | 0.40 | 0.69 | 0.35 | 0.75  | 0.41 | 0.63  | 0.16 | 0.54  | 0.29 | 0.51  | 0.09 | 0.34  | 0.19 | 0.33  | 0.10  | 0.34               | 0.19              | 0.33               |
| 6  | 0.46 | 0.81 | 1.89 | 1.64 | 0.35 | 0.79 | 0.40 | 0.69 | 0.35 | 0.77  | 0.40 | 0.67  | 0.16 | 0.55  | 0.28 | 0.53  | 0.09 | 0.35  | 0.18 | 0.34  | 0.10  | 0.35               | 0.18              | 0.34               |
| 7  | 0.43 | 0.88 | 1.89 | 1.64 | 0.40 | 0.80 | 0.41 | 0.69 | 0.37 | 0.76  | 0.41 | 0.67  | 0.17 | 0.55  | 0.28 | 0.52  | 0.11 | 0.35  | 0.19 | 0.33  | 0.12  | 0.35               | 0.18              | 0.33               |
| 8  | 0.43 | 0.87 | 1.90 | 1.61 | 0.40 | 0.80 | 0.40 | 0.68 | 0.38 | 0.77  | 0.40 | 0.67  | 0.19 | 0.56  | 0.28 | 0.52  | 0.12 | 0.36  | 0.19 | 0.33  | 0.13  | 0.36               | 0.18              | 0.33               |
| 9  | 0.45 | 0.87 | 1.87 | 1.67 | 0.39 | 0.79 | 0.40 | 0.70 | 0.38 | 0.78  | 0.41 | 0.67  | 0.19 | 0.57  | 0.29 | 0.52  | 0.12 | 0.36  | 0.19 | 0.33  | 0.13  | 0.36               | 0.18              | 0.33               |
| 10 | 0.45 | 0.86 | 1.88 | 1.68 | 0.39 | 0.79 | 0.42 | 0.71 | 0.38 | 0.82  | 0.41 | 0.67  | 0.19 | 0.59  | 0.29 | 0.53  | 0.12 | 0.37  | 0.19 | 0.34  | 0.13  | 0.37               | 0.19              | 0.34               |

## SM A.18 Results of the LCC: O&M unit costs [USD/m<sup>3</sup>] vs. local water fees

Figure 24 - Figure 29 show the comparison between local water fee and the O&M unit cost [USD/m<sup>3</sup>] for the 2m<sup>3</sup>/h (Figure 24), 5 m<sup>3</sup>/h (Figure 25), 10 m<sup>3</sup>/h (Figure 26), 25 m<sup>3</sup>/h (Figure 27) and 50 m<sup>3</sup>/h (Figure 28 and Figure 29) with a discount rate of 0%. The local water fees found in the West Nile region in the host communities and were between 1,000 UGX (0.28 USD) per household per month (equal to 444 UGX per m<sup>3</sup> assuming 5 persons/household and 15 litres/day/person) and 3,000 UGX/m<sup>3</sup> (0.83 USD).

To be noted that these are cumulative unit cost: at the year 3 the values indicate how much each m<sup>3</sup> of water produced in the 3 years should cost to have full cost recovery of all the O&M (operation expenditures) happened in the first 3 years; at the year 10 the values indicate how much each m<sup>3</sup> of water produced in 10 years should cost to obtain full cost recovery of all the O&M happening in the 10 years.

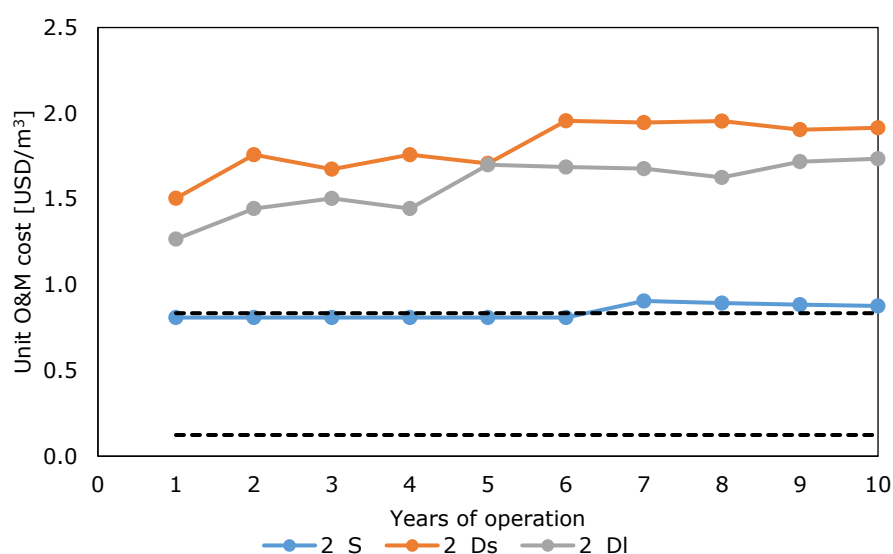

Figure 24: Comparison between the O&M costs [USD/m<sup>3</sup>] of the motorised systems with a pumping yield of 2 m<sup>3</sup>/h and the local water fee found in the West Nile region in the host communities. The water fees are 0.1236 USD/m<sup>3</sup> (444 UGX/m<sup>3</sup>) and 0.83 USD/m<sup>3</sup> (3,000 UGX/m<sup>3</sup>)

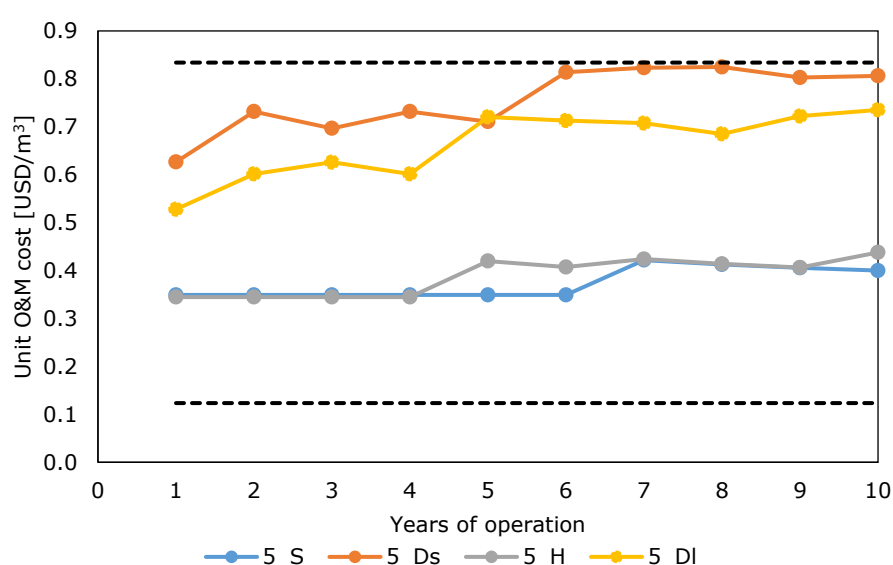

Figure 25: Comparison between the O&M costs [USD/m<sup>3</sup>] of the motorised systems with a pumping yield of 5 m<sup>3</sup>/h and the local water fee found in the West Nile region in the host communities. The water fees are 0.1236 USD/m<sup>3</sup> (444 UGX/m<sup>3</sup>) and 0.83 USD/m<sup>3</sup> (3,000 UGX/m<sup>3</sup>)

## Supporting information

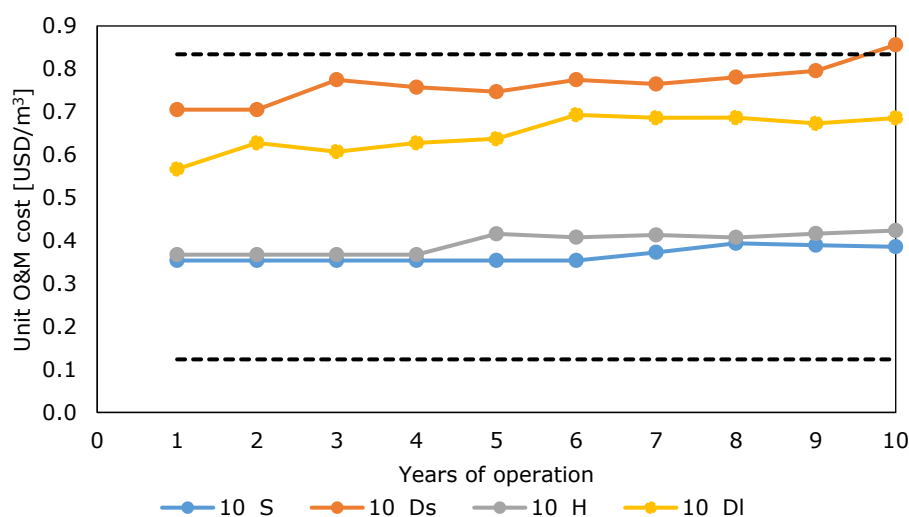

Figure 26: Comparison between the O&M costs [USD/m<sup>3</sup>] of the motorised systems with a pumping yield of 10 m<sup>3</sup>/h and the local water fee found in the West Nile region in the host communities. The water fees are 0.1236 USD/m<sup>3</sup> (444 UGX/m<sup>3</sup>) and 0.83 USD/m<sup>3</sup> (3,000 UGX/m<sup>3</sup>)

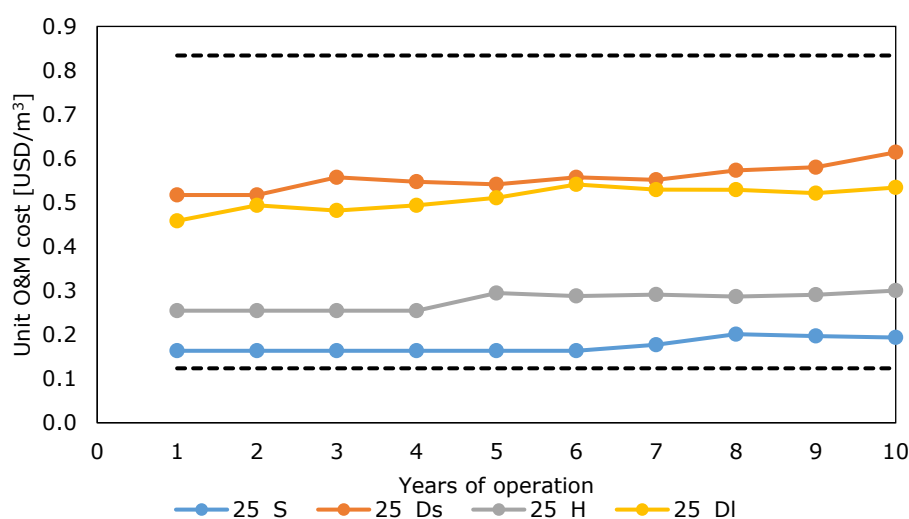

Figure 27: Comparison between the O&M costs [USD/m<sup>3</sup>] of the motorised systems with a pumping yield of 25 m<sup>3</sup>/h and the local water fee found in the West Nile region in the host communities. The water fees are 0.1236 USD/m<sup>3</sup> (444 UGX/m<sup>3</sup>) and 0.83 USD/m<sup>3</sup> (3,000 UGX/m<sup>3</sup>)

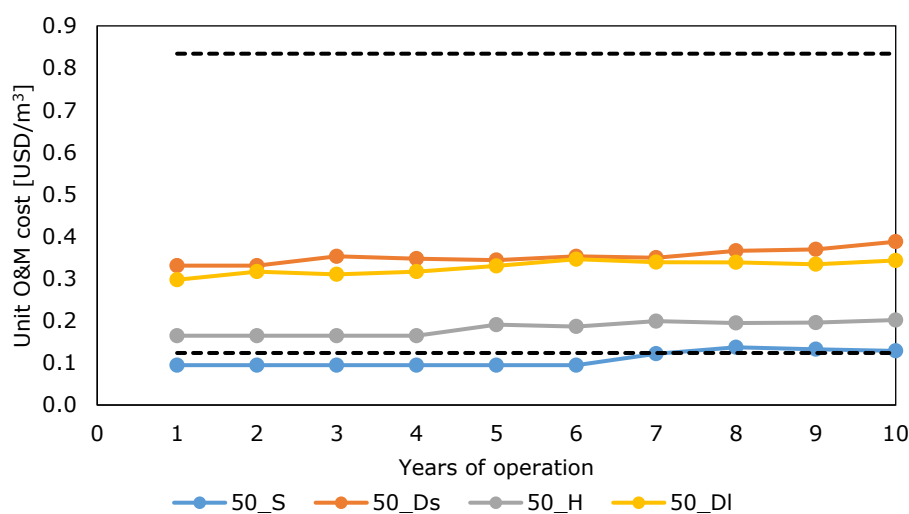

Figure 28: Comparison between the O&M costs [USD/m<sup>3</sup>] of the motorised systems with a pumping yield of 50 m<sup>3</sup>/h (1) and the local water fee found in the West Nile region in the host communities. The water fees are 0.1236 USD/m<sup>3</sup> (444 UGX/m<sup>3</sup>) and 0.83 USD/m<sup>3</sup> (3,000 UGX/m<sup>3</sup>)

Supporting information

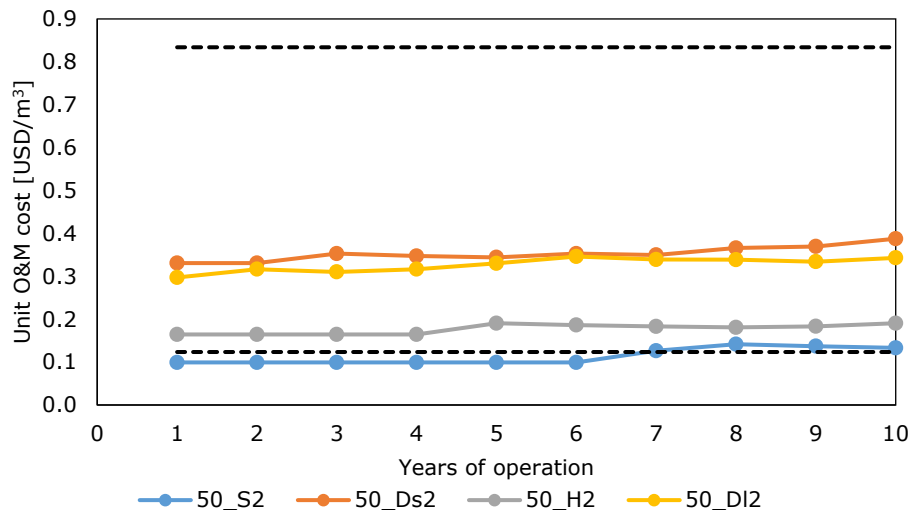

Figure 29: Comparison between the O&M costs [USD/m³] of the motorised systems with a pumping yield of 50 m³/h (2) and the local water fee found in the West Nile region in the host communities. The water fees are 0.1236 USD/m³ (444 UGX/m³) and 0.83 USD/m³ (3,000 UGX/m³)

## SM A.19 Results of the LCC: O&M unit costs [USD/m<sup>3</sup>], economy of scale

The local water fees were compared with the O&M unit cost [USD/m<sup>3</sup>] for the solar-powered systems (Figure 30), short running diesel powered systems (Figure 31), hybrid systems (Figure 32) and long-running diesel powered systems (Figure 33). The local water fees found in the West Nile region in the host communities and were between 1,000 UGX (0.28 USD) per household per month (equal to 444 UGX per m<sup>3</sup> assuming 5 persons/household and 15 litres/day/person) and 3,000 UGX/m<sup>3</sup> (0.83 USD).

To be remembered that these are cumulative unit cost: at the year 3 the values indicate how much each m<sup>3</sup> of water produced in the 3 years should cost to have full cost recovery of all the O&M (operation expenditures) happened in the first 3 years; at the year 10 the values indicate how much each m<sup>3</sup> of water produced in 10 years should cost to obtain full cost recovery of all the O&M happening in the 10 years.

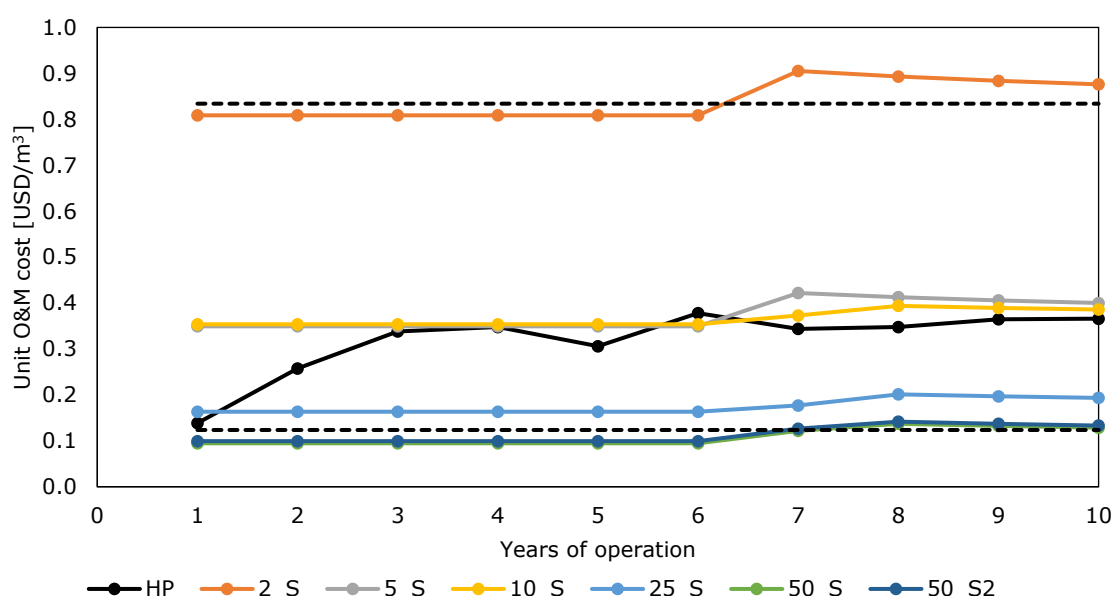

Figure 30: Comparison between the O&M costs [USD/m<sup>3</sup>] of a hand pump and all the solar-powered systems (2, 5, 10, 25 and 50 m<sup>3</sup>/h) and the local water fee found in the West Nile region in the host communities. The two-dotted lines indicate the cost of water in the host communities in similar conditions: 0.1236 USD/m<sup>3</sup> (444 UGX/m<sup>3</sup>) and 0.83 USD/m<sup>3</sup> (3,000 UGX/m<sup>3</sup>).

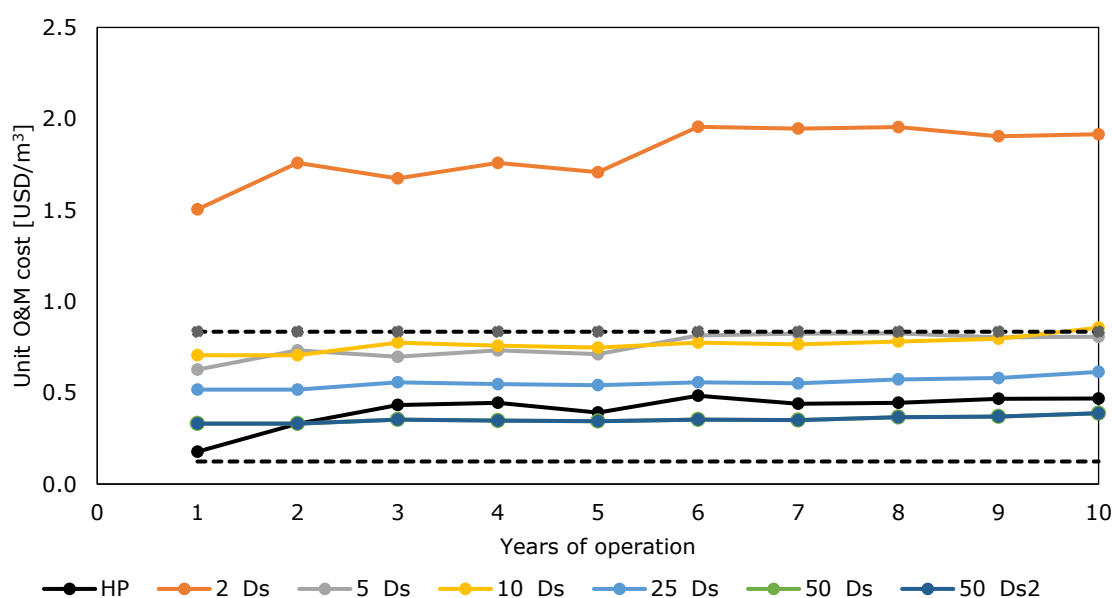

Figure 31: Comparison between the O&M costs [USD/m<sup>3</sup>] of a hand pump and all the short running diesel-powered (7 hours per day) systems (2, 5, 10, 25 and 50 m<sup>3</sup>/h) and the local water fee found in the West Nile region in the host communities. The two-dotted lines indicate the cost of water in the host communities in similar conditions: 0.1236 USD/m<sup>3</sup> (444 UGX/m<sup>3</sup>) and 0.83 USD/m<sup>3</sup> (3,000 UGX/m<sup>3</sup>).

## Supporting information

communities. The two-dotted lines indicate the cost of water in the host communities in similar conditions: 0.1236 USD/m<sup>3</sup> (444 UGX/m<sup>3</sup>) and 0.83 USD/m<sup>3</sup> (3,000 UGX/m<sup>3</sup>).

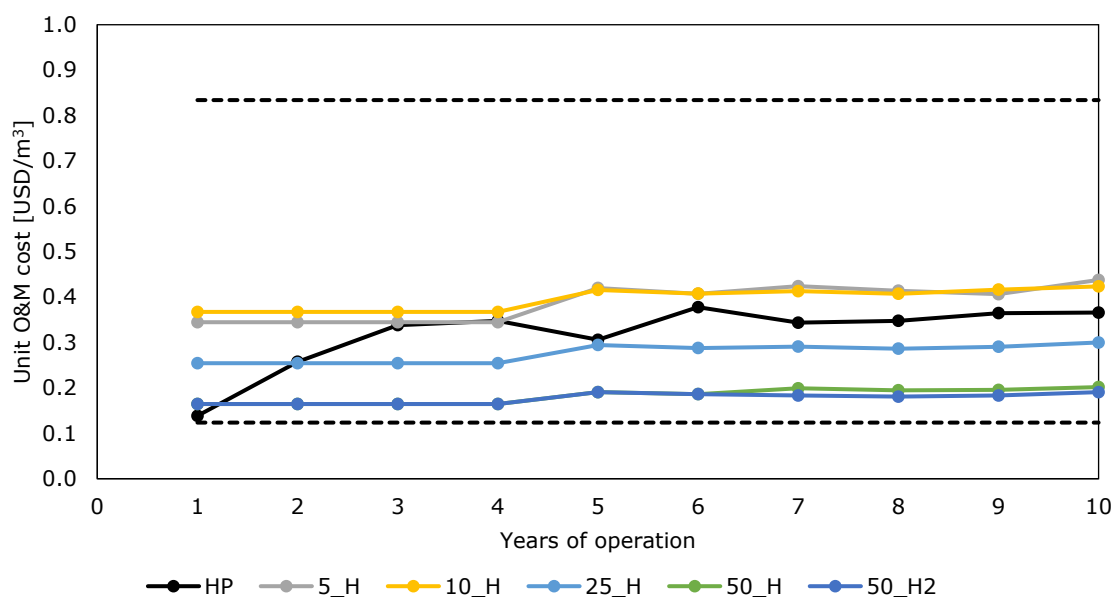

Figure 32: Comparison between the O&M costs [USD/m<sup>3</sup>] of a hand pump and all the hybrid (solar + diesel) systems (2, 5, 10, 25 and 50 m<sup>3</sup>/h) and the local water fee found in the West Nile region in the host communities. The two-dotted lines indicate the cost of water in the host communities in similar conditions: 0.1236 USD/m<sup>3</sup> (444 UGX/m<sup>3</sup>) and 0.83 USD/m<sup>3</sup> (3,000 UGX/m<sup>3</sup>).

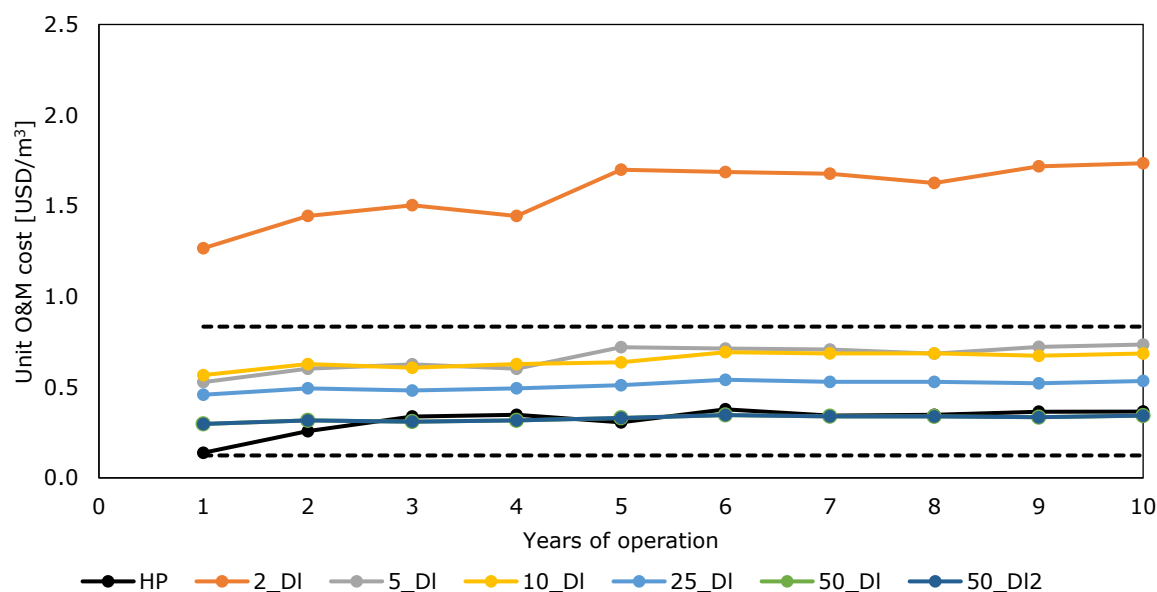

Figure 33: Comparison between the O&M costs [USD/m<sup>3</sup>] of a hand pump and all the long-running diesel-powered (10/12 hours per day) systems (2, 5, 10, 25 and 50 m<sup>3</sup>/h) and the local water fee found in the West Nile region in the host communities. The two-dotted lines indicate the cost of water in the host communities in similar conditions: 0.1236 USD/m<sup>3</sup> (444 UGX/m<sup>3</sup>) and 0.83 USD/m<sup>3</sup> (3,000 UGX/m<sup>3</sup>).



## Supporting information

## SM A.20 Results of the LCC: O&amp;M costs, contribution analysis

The O&M costs were further analysed by dividing them in four classes: salary, fuel, minor maintenance, and major maintenance (Table 22).

To be remembered that these are cumulative O&M cost: at the year 3 the values indicate the contribution analysis of the sum of all the O&M costs encountered during the first 3 years of operations; at the year 10 the values indicate the contribution analysis of the sum of all the O&M costs encountered during the first 10 years of operations.

Table 22: contribution analysis of the cumulative O&M costs for all the timeframes (1-10 years) and all the alternatives modelled in the paper

|      | Year | Salary | Fuel | Minor maint. | Major maint. | TOT  |
|------|------|--------|------|--------------|--------------|------|
| HP   | 1    | 36%    | 0%   | 64%          | 0%           | 100% |
|      | 2    | 19%    | 0%   | 35%          | 46%          | 100% |
|      | 3    | 15%    | 0%   | 26%          | 59%          | 100% |
|      | 4    | 14%    | 0%   | 26%          | 60%          | 100% |
|      | 5    | 16%    | 0%   | 29%          | 55%          | 100% |
|      | 6    | 13%    | 0%   | 24%          | 63%          | 100% |
|      | 7    | 14%    | 0%   | 26%          | 60%          | 100% |
|      | 8    | 14%    | 0%   | 26%          | 60%          | 100% |
|      | 9    | 13%    | 0%   | 24%          | 62%          | 100% |
|      | 10   | 13%    | 0%   | 24%          | 62%          | 100% |
| 2_S  | 1    | 80%    | 0%   | 20%          | 0%           | 100% |
|      | 2    | 80%    | 0%   | 20%          | 0%           | 100% |
|      | 3    | 80%    | 0%   | 20%          | 0%           | 100% |
|      | 4    | 80%    | 0%   | 20%          | 0%           | 100% |
|      | 5    | 80%    | 0%   | 20%          | 0%           | 100% |
|      | 6    | 80%    | 0%   | 20%          | 0%           | 100% |
|      | 7    | 71%    | 0%   | 18%          | 11%          | 100% |
|      | 8    | 72%    | 0%   | 18%          | 9%           | 100% |
|      | 9    | 73%    | 0%   | 18%          | 8%           | 100% |
|      | 10   | 74%    | 0%   | 19%          | 8%           | 100% |
| 2_Ds | 1    | 43%    | 39%  | 18%          | 0%           | 100% |
|      | 2    | 37%    | 33%  | 16%          | 14%          | 100% |
|      | 3    | 39%    | 35%  | 16%          | 10%          | 100% |
|      | 4    | 37%    | 33%  | 16%          | 14%          | 100% |
|      | 5    | 38%    | 34%  | 16%          | 12%          | 100% |
|      | 6    | 33%    | 30%  | 14%          | 23%          | 100% |
|      | 7    | 33%    | 30%  | 14%          | 23%          | 100% |
|      | 8    | 33%    | 30%  | 14%          | 23%          | 100% |
|      | 9    | 34%    | 31%  | 14%          | 21%          | 100% |
|      | 10   | 34%    | 30%  | 14%          | 21%          | 100% |
| 2_DI | 1    | 36%    | 46%  | 18%          | 0%           | 100% |
|      | 2    | 31%    | 40%  | 16%          | 12%          | 100% |
|      | 3    | 30%    | 39%  | 15%          | 16%          | 100% |
|      | 4    | 31%    | 40%  | 16%          | 12%          | 100% |
|      | 5    | 27%    | 34%  | 14%          | 25%          | 100% |
|      | 6    | 27%    | 35%  | 14%          | 25%          | 100% |
|      | 7    | 27%    | 35%  | 14%          | 25%          | 100% |
|      | 8    | 28%    | 36%  | 14%          | 22%          | 100% |
|      | 9    | 26%    | 34%  | 13%          | 26%          | 100% |
|      | 10   | 26%    | 34%  | 13%          | 27%          | 100% |
| 5_S  | 1    | 75%    | 0%   | 25%          | 0%           | 100% |
|      | 2    | 75%    | 0%   | 25%          | 0%           | 100% |
|      | 3    | 75%    | 0%   | 25%          | 0%           | 100% |
|      | 4    | 75%    | 0%   | 25%          | 0%           | 100% |
|      | 5    | 75%    | 0%   | 25%          | 0%           | 100% |
|      | 6    | 75%    | 0%   | 25%          | 0%           | 100% |
|      | 7    | 62%    | 0%   | 21%          | 17%          | 100% |
|      | 8    | 64%    | 0%   | 21%          | 15%          | 100% |
|      | 9    | 65%    | 0%   | 21%          | 14%          | 100% |
|      | 10   | 66%    | 0%   | 22%          | 13%          | 100% |
| 5_Ds | 1    | 42%    | 37%  | 21%          | 0%           | 100% |
|      | 2    | 36%    | 32%  | 18%          | 14%          | 100% |

## Supporting information

|              |           |     |     |     |     |      |
|--------------|-----------|-----|-----|-----|-----|------|
|              | <b>3</b>  | 38% | 34% | 19% | 10% | 100% |
|              | <b>4</b>  | 36% | 32% | 18% | 14% | 100% |
|              | <b>5</b>  | 37% | 33% | 18% | 12% | 100% |
|              | <b>6</b>  | 32% | 29% | 16% | 23% | 100% |
|              | <b>7</b>  | 32% | 28% | 16% | 24% | 100% |
|              | <b>8</b>  | 32% | 28% | 16% | 24% | 100% |
|              | <b>9</b>  | 33% | 29% | 16% | 22% | 100% |
|              | <b>10</b> | 33% | 29% | 16% | 22% | 100% |
| <b>5_H</b>   | <b>1</b>  | 53% | 20% | 26% | 0%  | 100% |
|              | <b>2</b>  | 53% | 20% | 26% | 0%  | 100% |
|              | <b>3</b>  | 53% | 20% | 26% | 0%  | 100% |
|              | <b>4</b>  | 53% | 20% | 26% | 0%  | 100% |
|              | <b>5</b>  | 44% | 17% | 22% | 18% | 100% |
|              | <b>6</b>  | 45% | 17% | 22% | 15% | 100% |
|              | <b>7</b>  | 43% | 17% | 21% | 19% | 100% |
|              | <b>8</b>  | 44% | 17% | 22% | 17% | 100% |
|              | <b>9</b>  | 45% | 17% | 22% | 15% | 100% |
|              | <b>10</b> | 42% | 16% | 21% | 21% | 100% |
| <b>5_DI</b>  | <b>1</b>  | 35% | 44% | 21% | 0%  | 100% |
|              | <b>2</b>  | 31% | 39% | 18% | 12% | 100% |
|              | <b>3</b>  | 29% | 37% | 18% | 16% | 100% |
|              | <b>4</b>  | 31% | 39% | 18% | 12% | 100% |
|              | <b>5</b>  | 25% | 32% | 15% | 27% | 100% |
|              | <b>6</b>  | 26% | 33% | 16% | 26% | 100% |
|              | <b>7</b>  | 26% | 33% | 16% | 25% | 100% |
|              | <b>8</b>  | 27% | 34% | 16% | 23% | 100% |
|              | <b>9</b>  | 25% | 32% | 15% | 27% | 100% |
|              | <b>10</b> | 25% | 32% | 15% | 28% | 100% |
| <b>10_S</b>  | <b>1</b>  | 83% | 0%  | 17% | 0%  | 100% |
|              | <b>2</b>  | 83% | 0%  | 17% | 0%  | 100% |
|              | <b>3</b>  | 83% | 0%  | 17% | 0%  | 100% |
|              | <b>4</b>  | 83% | 0%  | 17% | 0%  | 100% |
|              | <b>5</b>  | 83% | 0%  | 17% | 0%  | 100% |
|              | <b>6</b>  | 83% | 0%  | 17% | 0%  | 100% |
|              | <b>7</b>  | 79% | 0%  | 16% | 5%  | 100% |
|              | <b>8</b>  | 74% | 0%  | 15% | 10% | 100% |
|              | <b>9</b>  | 75% | 0%  | 16% | 9%  | 100% |
|              | <b>10</b> | 76% | 0%  | 16% | 8%  | 100% |
| <b>10_Ds</b> | <b>1</b>  | 42% | 47% | 11% | 0%  | 100% |
|              | <b>2</b>  | 42% | 47% | 11% | 0%  | 100% |
|              | <b>3</b>  | 38% | 43% | 10% | 9%  | 100% |
|              | <b>4</b>  | 39% | 44% | 10% | 7%  | 100% |
|              | <b>5</b>  | 39% | 45% | 10% | 6%  | 100% |
|              | <b>6</b>  | 38% | 43% | 10% | 9%  | 100% |
|              | <b>7</b>  | 38% | 44% | 10% | 8%  | 100% |
|              | <b>8</b>  | 38% | 43% | 10% | 10% | 100% |
|              | <b>9</b>  | 37% | 42% | 10% | 11% | 100% |
|              | <b>10</b> | 34% | 39% | 9%  | 18% | 100% |
| <b>10_H</b>  | <b>1</b>  | 47% | 38% | 16% | 0%  | 100% |
|              | <b>2</b>  | 47% | 38% | 16% | 0%  | 100% |
|              | <b>3</b>  | 47% | 38% | 16% | 0%  | 100% |
|              | <b>4</b>  | 47% | 38% | 16% | 0%  | 100% |
|              | <b>5</b>  | 41% | 33% | 14% | 12% | 100% |
|              | <b>6</b>  | 42% | 34% | 14% | 10% | 100% |
|              | <b>7</b>  | 41% | 34% | 14% | 11% | 100% |
|              | <b>8</b>  | 42% | 34% | 14% | 10% | 100% |
|              | <b>9</b>  | 41% | 33% | 14% | 12% | 100% |
|              | <b>10</b> | 40% | 33% | 14% | 13% | 100% |
| <b>10_DI</b> | <b>1</b>  | 30% | 59% | 11% | 0%  | 100% |
|              | <b>2</b>  | 27% | 53% | 10% | 10% | 100% |
|              | <b>3</b>  | 28% | 55% | 10% | 7%  | 100% |
|              | <b>4</b>  | 27% | 53% | 10% | 10% | 100% |
|              | <b>5</b>  | 27% | 52% | 10% | 11% | 100% |
|              | <b>6</b>  | 25% | 48% | 9%  | 18% | 100% |
|              | <b>7</b>  | 25% | 49% | 9%  | 17% | 100% |
|              | <b>8</b>  | 25% | 49% | 9%  | 17% | 100% |
|              | <b>9</b>  | 25% | 50% | 9%  | 16% | 100% |
|              | <b>10</b> | 25% | 49% | 9%  | 17% | 100% |

## Supporting information

|       |    |     |     |     |     |      |
|-------|----|-----|-----|-----|-----|------|
| 25_S  | 1  | 74% | 0%  | 26% | 0%  | 100% |
|       | 2  | 74% | 0%  | 26% | 0%  | 100% |
|       | 3  | 74% | 0%  | 26% | 0%  | 100% |
|       | 4  | 74% | 0%  | 26% | 0%  | 100% |
|       | 5  | 74% | 0%  | 26% | 0%  | 100% |
|       | 6  | 74% | 0%  | 26% | 0%  | 100% |
|       | 7  | 68% | 0%  | 24% | 8%  | 100% |
|       | 8  | 60% | 0%  | 21% | 19% | 100% |
|       | 9  | 62% | 0%  | 21% | 17% | 100% |
|       | 10 | 63% | 0%  | 22% | 16% | 100% |
| 25_Ds | 1  | 23% | 67% | 9%  | 0%  | 100% |
|       | 2  | 23% | 67% | 9%  | 0%  | 100% |
|       | 3  | 22% | 62% | 9%  | 7%  | 100% |
|       | 4  | 22% | 63% | 9%  | 6%  | 100% |
|       | 5  | 22% | 64% | 9%  | 4%  | 100% |
|       | 6  | 22% | 62% | 9%  | 7%  | 100% |
|       | 7  | 22% | 63% | 9%  | 6%  | 100% |
|       | 8  | 21% | 61% | 9%  | 10% | 100% |
|       | 9  | 21% | 60% | 8%  | 11% | 100% |
|       | 10 | 20% | 56% | 8%  | 16% | 100% |
| 25_H  | 1  | 28% | 57% | 15% | 0%  | 100% |
|       | 2  | 28% | 57% | 15% | 0%  | 100% |
|       | 3  | 28% | 57% | 15% | 0%  | 100% |
|       | 4  | 28% | 57% | 15% | 0%  | 100% |
|       | 5  | 24% | 49% | 13% | 14% | 100% |
|       | 6  | 25% | 50% | 14% | 12% | 100% |
|       | 7  | 24% | 50% | 13% | 13% | 100% |
|       | 8  | 25% | 50% | 14% | 11% | 100% |
|       | 9  | 24% | 50% | 13% | 12% | 100% |
|       | 10 | 24% | 48% | 13% | 15% | 100% |
| 25_DI | 1  | 15% | 76% | 9%  | 0%  | 100% |
|       | 2  | 14% | 70% | 8%  | 7%  | 100% |
|       | 3  | 15% | 72% | 8%  | 5%  | 100% |
|       | 4  | 14% | 70% | 8%  | 7%  | 100% |
|       | 5  | 14% | 68% | 8%  | 10% | 100% |
|       | 6  | 13% | 64% | 8%  | 15% | 100% |
|       | 7  | 13% | 66% | 8%  | 13% | 100% |
|       | 8  | 13% | 66% | 8%  | 13% | 100% |
|       | 9  | 14% | 67% | 8%  | 12% | 100% |
|       | 10 | 13% | 65% | 8%  | 14% | 100% |
| 50_S  | 1  | 64% | 0%  | 36% | 0%  | 100% |
|       | 2  | 64% | 0%  | 36% | 0%  | 100% |
|       | 3  | 64% | 0%  | 36% | 0%  | 100% |
|       | 4  | 64% | 0%  | 36% | 0%  | 100% |
|       | 5  | 64% | 0%  | 36% | 0%  | 100% |
|       | 6  | 64% | 0%  | 36% | 0%  | 100% |
|       | 7  | 50% | 0%  | 28% | 22% | 100% |
|       | 8  | 44% | 0%  | 25% | 31% | 100% |
|       | 9  | 46% | 0%  | 26% | 29% | 100% |
|       | 10 | 47% | 0%  | 26% | 26% | 100% |
| 50_Ds | 1  | 19% | 71% | 10% | 0%  | 100% |
|       | 2  | 19% | 71% | 10% | 0%  | 100% |
|       | 3  | 18% | 66% | 9%  | 6%  | 100% |
|       | 4  | 19% | 67% | 9%  | 5%  | 100% |
|       | 5  | 19% | 68% | 10% | 4%  | 100% |
|       | 6  | 18% | 66% | 9%  | 6%  | 100% |
|       | 7  | 18% | 67% | 9%  | 5%  | 100% |
|       | 8  | 18% | 64% | 9%  | 10% | 100% |
|       | 9  | 17% | 63% | 9%  | 10% | 100% |
|       | 10 | 17% | 60% | 8%  | 15% | 100% |
| 50_H  | 1  | 23% | 59% | 18% | 0%  | 100% |
|       | 2  | 23% | 59% | 18% | 0%  | 100% |
|       | 3  | 23% | 59% | 18% | 0%  | 100% |
|       | 4  | 23% | 59% | 18% | 0%  | 100% |
|       | 5  | 20% | 51% | 16% | 14% | 100% |
|       | 6  | 20% | 52% | 16% | 12% | 100% |
|       | 7  | 19% | 49% | 15% | 17% | 100% |
|       | 8  | 19% | 50% | 15% | 16% | 100% |
|       | 9  | 19% | 50% | 15% | 16% | 100% |

## Supporting information

|               |           |     |     |     |     |      |
|---------------|-----------|-----|-----|-----|-----|------|
|               | <b>10</b> | 19% | 48% | 15% | 18% | 100% |
| <b>50_DI</b>  | <b>1</b>  | 13% | 79% | 9%  | 0%  | 100% |
|               | <b>2</b>  | 12% | 74% | 8%  | 6%  | 100% |
|               | <b>3</b>  | 12% | 75% | 8%  | 4%  | 100% |
|               | <b>4</b>  | 12% | 74% | 8%  | 6%  | 100% |
|               | <b>5</b>  | 11% | 71% | 8%  | 10% | 100% |
|               | <b>6</b>  | 11% | 67% | 8%  | 14% | 100% |
|               | <b>7</b>  | 11% | 69% | 8%  | 12% | 100% |
|               | <b>8</b>  | 11% | 69% | 8%  | 12% | 100% |
|               | <b>9</b>  | 11% | 70% | 8%  | 11% | 100% |
|               | <b>10</b> | 11% | 68% | 8%  | 13% | 100% |
| <b>50_S2</b>  | <b>1</b>  | 61% | 0%  | 39% | 0%  | 100% |
|               | <b>2</b>  | 61% | 0%  | 39% | 0%  | 100% |
|               | <b>3</b>  | 61% | 0%  | 39% | 0%  | 100% |
|               | <b>4</b>  | 61% | 0%  | 39% | 0%  | 100% |
|               | <b>5</b>  | 61% | 0%  | 39% | 0%  | 100% |
|               | <b>6</b>  | 61% | 0%  | 39% | 0%  | 100% |
|               | <b>7</b>  | 48% | 0%  | 31% | 21% | 100% |
|               | <b>8</b>  | 43% | 0%  | 27% | 30% | 100% |
|               | <b>9</b>  | 44% | 0%  | 28% | 28% | 100% |
|               | <b>10</b> | 45% | 0%  | 29% | 25% | 100% |
| <b>50_Ds2</b> | <b>1</b>  | 19% | 71% | 10% | 0%  | 100% |
|               | <b>2</b>  | 19% | 71% | 10% | 0%  | 100% |
|               | <b>3</b>  | 18% | 66% | 9%  | 6%  | 100% |
|               | <b>4</b>  | 19% | 67% | 9%  | 5%  | 100% |
|               | <b>5</b>  | 19% | 68% | 10% | 4%  | 100% |
|               | <b>6</b>  | 18% | 66% | 9%  | 6%  | 100% |
|               | <b>7</b>  | 18% | 67% | 9%  | 5%  | 100% |
|               | <b>8</b>  | 18% | 64% | 9%  | 10% | 100% |
|               | <b>9</b>  | 17% | 63% | 9%  | 10% | 100% |
|               | <b>10</b> | 17% | 60% | 8%  | 15% | 100% |
| <b>50_H2</b>  | <b>1</b>  | 23% | 59% | 18% | 0%  | 100% |
|               | <b>2</b>  | 23% | 59% | 18% | 0%  | 100% |
|               | <b>3</b>  | 23% | 59% | 18% | 0%  | 100% |
|               | <b>4</b>  | 23% | 59% | 18% | 0%  | 100% |
|               | <b>5</b>  | 20% | 51% | 16% | 14% | 100% |
|               | <b>6</b>  | 20% | 52% | 16% | 12% | 100% |
|               | <b>7</b>  | 21% | 53% | 16% | 10% | 100% |
|               | <b>8</b>  | 21% | 54% | 16% | 9%  | 100% |
|               | <b>9</b>  | 21% | 53% | 16% | 10% | 100% |
|               | <b>10</b> | 20% | 51% | 16% | 14% | 100% |
| <b>50_DI2</b> | <b>1</b>  | 13% | 79% | 9%  | 0%  | 100% |
|               | <b>2</b>  | 12% | 74% | 8%  | 6%  | 100% |
|               | <b>3</b>  | 12% | 75% | 8%  | 4%  | 100% |
|               | <b>4</b>  | 12% | 74% | 8%  | 6%  | 100% |
|               | <b>5</b>  | 11% | 71% | 8%  | 10% | 100% |
|               | <b>6</b>  | 11% | 67% | 8%  | 14% | 100% |
|               | <b>7</b>  | 11% | 69% | 8%  | 12% | 100% |
|               | <b>8</b>  | 11% | 69% | 8%  | 12% | 100% |
|               | <b>9</b>  | 11% | 70% | 8%  | 11% | 100% |
|               | <b>10</b> | 11% | 68% | 8%  | 13% | 100% |

## Supporting information

## SM A.21 Results of the LCC: scenario analysis

We tested our baseline results (with a discount rate of 0%) by varying the following parameters:

- Lifetime of the pump, 1 year shorter
- Lifetime of the pump, 1 year longer
- Lifetime of the inverter, 1 year shorter (6 instead than 7)
- Lifetime of the inverter, 1 year longer (8 instead than 7)
- Lifetime of the generator, 10,000 hours
- Lifetime of the generator, 35,000 hours
- Time needed before a generator overhaul, 3,500 hours (for 2 and 5 m<sup>3</sup>/h) and 5,000 hours (for 10, 15 and 50 m<sup>3</sup>/h)
- Time needed before a generator overhaul, 10,000 hours
- Cost of panels, 20% lower
- Cost of panels, 20% higher
- Cost of fuel – 4,000 UGX (instead than 3,000 UGX)
- Diesel consumption, 50% more

The scenario analysis quantified the impact of these choices on the unit cost per m<sup>3</sup> of water delivered and on the breakeven years.

Table 23: Differences in the breakeven years. -x indicates that the breakeven year is x years earlier than in the baseline (in green), +x indicates that the breakeven years is x years later than in the baseline (in red). \*the breakeven is not seen when fixing the maximum timeframe as 10 years, while it is observed during the scenario analysis

|                         |                  | Breakeven year |        |                   |         |                    |         |                    |                 |                |      |                 |                    |
|-------------------------|------------------|----------------|--------|-------------------|---------|--------------------|---------|--------------------|-----------------|----------------|------|-----------------|--------------------|
|                         |                  | Pump lifetime  |        | Inverter lifetime |         | Generator lifetime |         | Generator overhaul |                 | Cost of panels |      | Cost fuel       | Diesel consumption |
| Alternatives comparison | Baseline         | - 1year        | +1year | 6 years           | 8 years | 10,000h            | 35,000h | 3,500h or 5,000    | 10,000          | -20%           | +20% | 4,000 UGX       | +50%               |
| 2_S & 2_Ds              | 1 <sup>st</sup>  | 0              | 0      | 0                 | 0       | 0                  | 0       | 0                  | 0               | 0              | 0    | 0               | 0                  |
| 2_S & 2_DI              | 2 <sup>nd</sup>  | 0              | 0      | 0                 | 0       | 0                  | 0       | 0                  | +1              | 0              | 0    | 0               | 0                  |
| 5_S & 5_Ds              | 3 <sup>rd</sup>  | 0              | 0      | 0                 | 0       | 0                  | 0       | 0                  | +1              | 0              | +1   | 0               | 0                  |
| 5_H & 5_DI              | 5 <sup>th</sup>  | 0              | +1     | 0                 | 0       | -1                 | +1      | 0                  | 0               | 0              | 0    | 0               | 0                  |
| 5_S & 5_DI              | 10 <sup>th</sup> | 0              | -      | 0                 | 0       | 0                  | -       | 0                  | -               | 0              | +1   | -1              | -1                 |
| 10_H & 10_DI            | 3 <sup>th</sup>  | 0              | 0      | 0                 | 0       | 0                  | 0       | 0                  | 4 <sup>th</sup> | 0              | +2   | 0               | 0                  |
| 10_H & 10_DI            | 6 <sup>th</sup>  | 0              | 0      | 0                 | 0       | -2                 | 0       | -1                 | -1              | -1             | 0    | -2              | 0                  |
| 10_S & 10_DI            | -                | -              | -      | -                 | -       | 8 <sup>th</sup>    | -       | -                  | -               | -              | 0    | 8 <sup>th</sup> | -                  |
| 25_H & 25_DI            | 3 <sup>th</sup>  | 0              | 0      | 0                 | 0       | 0                  | 0       | 0                  | 0               | 0              | 0    | 0               | 0                  |
| 25_H & 25_DI            | 4 <sup>th</sup>  | 0              | 0      | 0                 | 0       | -1                 | 0       | 0                  | 0               | 0              | 0    | -1              | 0                  |
| 25_S & 25_DI            | 7 <sup>th</sup>  | +1             | 0      | 0                 | 0       | -1                 | 0       | -1                 | 0               | -1             | 0    | -2              | -1                 |

# A MULTI-CRITERIA ASSESSMENT OF WATER SUPPLY IN UGANDAN REFUGEE SETTLEMENTS

## Supporting information

| 50_S & 50_Ds   | 4 <sup>th</sup> | 0 | 0 | 0 | 0  | 0  | 0 | 0  | 0  | 0  | +1 | -1 | 0  |
|----------------|-----------------|---|---|---|----|----|---|----|----|----|----|----|----|
| 50_H & 50_DI   | 6 <sup>th</sup> | 0 | 0 | 0 | 0  | -1 | 0 | -1 | -1 | -1 | 0  | -2 | -1 |
| 50_S & 50_DI   | 8 <sup>th</sup> | 0 | 0 | 0 | -1 | -2 | 0 | -2 | 0  | -2 | +1 | -3 | -2 |
| 50_S2 & 50_Ds2 | 5 <sup>th</sup> | 0 | 0 | 0 | 0  | -1 | 0 | 0  | 0  | -1 | 0  | -1 | -1 |
| 50_H2 & 50_DI2 | 6 <sup>th</sup> | 0 | 0 | 0 | 0  | -2 | 0 | -1 | -1 | -1 | 0  | -2 | -1 |
| 50_S2 & 50_DI2 | 8 <sup>th</sup> | 0 | 0 | 0 | -1 | -2 | 0 | -2 | 0  | -2 | +1 | -3 | -2 |

## SM A.22 Results of the carbon footprint: total kg CO<sub>2</sub>-eq

We calculated the cumulative kg CO<sub>2</sub>-eq for each timeframe for each alternative. The cumulative kg CO<sub>2</sub>-eq indicates the cumulative carbon footprint given a certain timeframe:

$$\text{Cumulative } (kg \text{ CO}_2 - eq)_{year\ i} = \sum_{i=1}^n (kg \text{ CO}_2 - eq)_i, \text{ where } i \text{ is the year of reference}$$

For example, the cumulative kg CO<sub>2</sub>-eq at the timeframe 1 indicates the CO<sub>2</sub>-eq due to the construction of the system and of the operation and maintenance activities encountered in the first year. The cumulative kg CO<sub>2</sub>-eq at timeframe 2 indicates the sum of the kg CO<sub>2</sub>-eq due to the construction of the system + the operation and maintenance activities done in the first and in the second year.

Figure 34 shows the total kg CO<sub>2</sub>-eq in the first year due to both the construction of the systems and the operation and maintenance activities encountered in the 1<sup>st</sup> year.

Table 24 Table 25 and Table 26 show the total kg CO<sub>2</sub>-eq for all the timeframes (1 to 10 years<sup>9</sup> and all the alternatives).

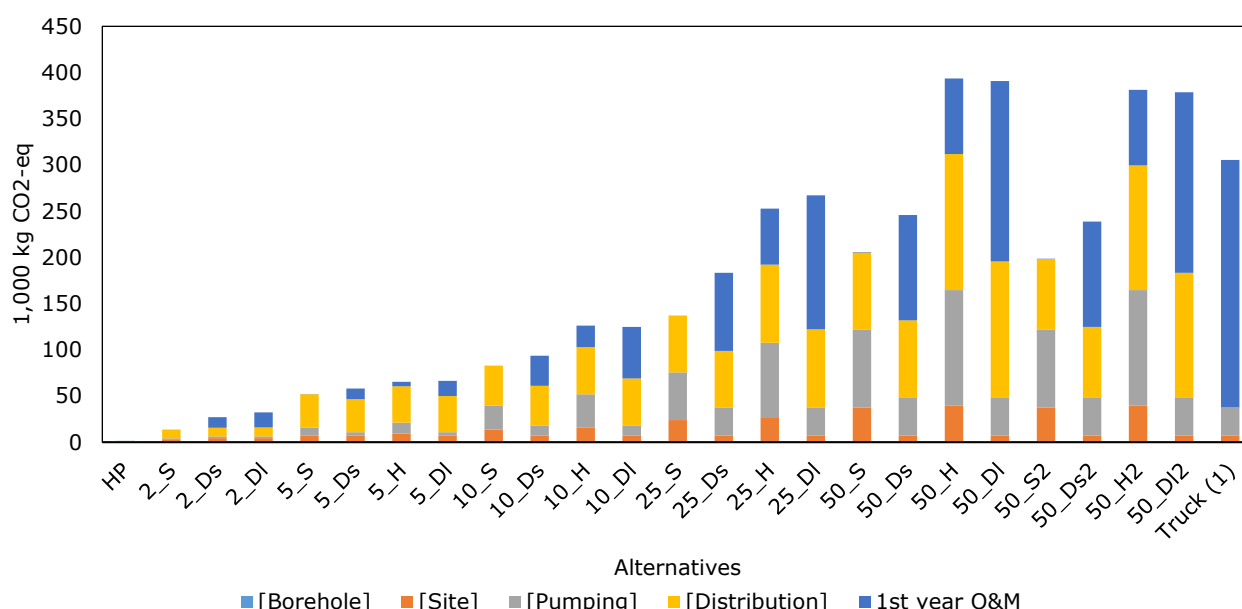

Figure 34: total kg CO<sub>2</sub>-eq emitted in the first year (due to capital and operational activities encountered in the 1<sup>st</sup> year) for all the alternatives



## Supporting information

Table 24: total kg CO<sub>2</sub>-eq (due to capital and operational activities) for all the timeframes (1 to 10 years) for the hand pump and the motorised systems with a pumping yield of 1,5 and 10 m<sup>3</sup>/h

|    | HP    | 2_S    | 2_Ds    | 2_DI    | 5_S    | 5_Ds    | 5_H     | 5_DI    | 10_S   | 10_Ds   | 10_H    | 10_DI   |
|----|-------|--------|---------|---------|--------|---------|---------|---------|--------|---------|---------|---------|
| 1  | 1,342 | 13,457 | 27,098  | 32,300  | 51,968 | 58,108  | 65,431  | 66,392  | 82,616 | 93,645  | 126,209 | 124,850 |
| 2  | 1,405 | 13,472 | 39,121  | 49,232  | 52,006 | 70,477  | 70,352  | 83,681  | 82,693 | 126,205 | 149,544 | 183,709 |
| 3  | 1,484 | 13,488 | 50,577  | 66,164  | 52,045 | 81,957  | 75,273  | 100,970 | 82,770 | 161,807 | 172,878 | 239,527 |
| 4  | 1,547 | 13,503 | 62,600  | 82,531  | 52,083 | 94,326  | 80,195  | 117,370 | 82,847 | 194,367 | 196,212 | 298,386 |
| 5  | 1,610 | 13,518 | 74,056  | 100,832 | 52,122 | 105,805 | 86,371  | 137,100 | 82,924 | 226,928 | 223,042 | 354,657 |
| 6  | 1,689 | 13,534 | 87,400  | 117,765 | 52,160 | 120,251 | 91,292  | 154,389 | 83,001 | 262,530 | 246,376 | 420,614 |
| 7  | 1,753 | 13,850 | 98,904  | 134,697 | 53,145 | 132,095 | 96,760  | 171,678 | 84,171 | 295,090 | 270,803 | 476,431 |
| 8  | 1,816 | 13,865 | 110,927 | 151,063 | 53,184 | 144,465 | 101,681 | 188,077 | 84,744 | 328,104 | 294,137 | 535,290 |
| 9  | 1,895 | 13,881 | 122,383 | 169,317 | 53,222 | 155,944 | 106,602 | 207,443 | 84,821 | 363,706 | 320,513 | 591,108 |
| 10 | 1,958 | 13,896 | 134,405 | 186,297 | 53,261 | 168,313 | 112,779 | 225,097 | 84,898 | 406,404 | 344,301 | 650,421 |

Table 25: total kg CO<sub>2</sub>-eq (due to capital and operational activities) for all the timeframes (1 to 10 years) for the motorised systems with a pumping yield of 25 and 50 m<sup>3</sup>/h

|    | 25_S    | 25_Ds   | 25_H      | 25_DI     | 50_S      | 50_Ds     | 50_H      | 50_DI     | 50_S2     | 50_Ds2    | 50_H2     | 50_DI2    |
|----|---------|---------|-----------|-----------|-----------|-----------|-----------|-----------|-----------|-----------|-----------|-----------|
| 1  | 136,965 | 183,367 | 252,669   | 267,161   | 205,757   | 245,825   | 393,481   | 390,853   | 198,606   | 238,674   | 381,222   | 378,594   |
| 2  | 137,158 | 267,950 | 313,278   | 421,058   | 206,142   | 359,736   | 475,230   | 598,262   | 198,991   | 352,585   | 462,971   | 586,003   |
| 3  | 137,350 | 361,430 | 373,886   | 566,056   | 206,526   | 485,780   | 556,979   | 793,536   | 199,375   | 478,629   | 544,720   | 781,278   |
| 4  | 137,542 | 446,013 | 434,494   | 719,953   | 206,911   | 599,690   | 638,728   | 1,000,945 | 199,760   | 592,539   | 626,469   | 988,686   |
| 5  | 137,735 | 530,595 | 504,542   | 865,492   | 207,296   | 713,600   | 733,248   | 1,196,857 | 200,145   | 706,449   | 720,990   | 1,184,598 |
| 6  | 137,927 | 624,076 | 565,150   | 1,040,151 | 207,680   | 839,645   | 814,998   | 1,432,578 | 200,529   | 832,494   | 802,739   | 1,420,320 |
| 7  | 141,098 | 708,658 | 628,737   | 1,185,149 | 211,739   | 953,555   | 900,420   | 1,627,853 | 204,588   | 946,404   | 888,162   | 1,615,594 |
| 8  | 141,882 | 793,781 | 689,345   | 1,339,046 | 212,821   | 1,068,102 | 982,169   | 1,835,262 | 205,670   | 1,060,951 | 969,911   | 1,823,003 |
| 9  | 142,074 | 887,262 | 758,852   | 1,484,044 | 213,205   | 1,194,146 | 1,076,053 | 2,030,537 | 206,054   | 1,186,995 | 1,063,794 | 2,018,278 |
| 10 | 638,750 | 638,750 | 1,095,000 | 1,095,000 | 1,277,500 | 1,277,500 | 2,190,000 | 2,190,000 | 1,277,500 | 1,277,500 | 2,190,000 | 2,190,000 |

Table 26: total kg CO<sub>2</sub>-eq (due to capital and operational activities) for all the timeframes (1 to 10 years) for the water trucking (1) and (2)

|    | Truck (1) | Truck (2) |
|----|-----------|-----------|
| 1  | 305,475   | 122,833   |
| 2  | 276,730   | 122,833   |
| 3  | 267,831   | 122,833   |
| 4  | 276,730   | 122,833   |
| 5  | 268,372   | 122,833   |
| 6  | 297,493   | 122,833   |
| 7  | 267,831   | 122,833   |
| 8  | 276,730   | 122,833   |
| 9  | 267,831   | 122,833   |
| 10 | 277,270   | 122,833   |

## Supporting information

SM A.23 Results of the carbon footprint: kg CO<sub>2</sub>-eq / m<sup>3</sup> of water delivered

Table 27 and Table 28 show the kg CO<sub>2</sub>-eq / m<sup>3</sup> for each year for each alternative. The cumulative kg CO<sub>2</sub>-eq indicates the cumulative carbon footprint given a certain timeframe:

$$\text{Cumulative } \left( \frac{\text{kg CO}_2\text{-eq}}{\text{m}^3} \right)_{\text{year } i} = \frac{\sum_{i=1}^n \text{kg CO}_2\text{-eq}_i}{\sum_{i=1}^n (\text{water delivered})_i}, \text{ where } i \text{ is the year of reference}$$

For example, the cumulative kg CO<sub>2</sub>-eq at year 2 indicates the sum of the kg CO<sub>2</sub>-eq due to the construction of the system + the O&M activities done in the first and in the second year divided the amount of water produced the first and the second year. To be noted that these are cumulative unit cost: at the year 3 the values indicate the kg CO<sub>2</sub>-eq associated to each m<sup>3</sup> of water produced in the 3 years including all the activities happening in the first 3 years.

Table 27: results of the carbon footprint: kg CO<sub>2</sub>-eq / m<sup>3</sup> for the hand pump and the motorised systems with a pumping yield of 2, 5 and 10 m<sup>3</sup>/h for all the timeframes (1 to 10 years). The colours show which one of the power systems (solar, short-running diesel, hybrid and long-running diesel) is cleanest fixed the pumping yield and the timeframe. Green is the cleanest and yellow the dirtiest.

|    | HP   | 2_S  | 2_Ds | 2_DI | 5_S  | 5_Ds | 5_H  | 5_DI | 10_S | 10_Ds | 10_H | 10_DI |
|----|------|------|------|------|------|------|------|------|------|-------|------|-------|
| 1  | 0.49 | 2.63 | 5.30 | 4.42 | 4.07 | 4.55 | 3.59 | 3.64 | 3.23 | 3.67  | 2.88 | 2.85  |
| 2  | 0.26 | 1.32 | 3.83 | 3.37 | 2.04 | 2.76 | 1.93 | 2.29 | 1.62 | 2.47  | 1.71 | 2.10  |
| 3  | 0.18 | 0.88 | 3.30 | 3.02 | 1.36 | 2.14 | 1.37 | 1.84 | 1.08 | 2.11  | 1.32 | 1.82  |
| 4  | 0.14 | 0.66 | 3.06 | 2.83 | 1.02 | 1.85 | 1.10 | 1.61 | 0.81 | 1.90  | 1.12 | 1.70  |
| 5  | 0.12 | 0.53 | 2.90 | 2.76 | 0.82 | 1.66 | 0.95 | 1.50 | 0.65 | 1.78  | 1.02 | 1.62  |
| 6  | 0.10 | 0.44 | 2.85 | 2.69 | 0.68 | 1.57 | 0.83 | 1.41 | 0.54 | 1.71  | 0.94 | 1.60  |
| 7  | 0.09 | 0.39 | 2.76 | 2.64 | 0.59 | 1.48 | 0.76 | 1.34 | 0.47 | 1.65  | 0.88 | 1.55  |
| 8  | 0.08 | 0.34 | 2.71 | 2.59 | 0.52 | 1.41 | 0.70 | 1.29 | 0.41 | 1.61  | 0.84 | 1.53  |
| 9  | 0.08 | 0.30 | 2.66 | 2.58 | 0.46 | 1.36 | 0.65 | 1.26 | 0.37 | 1.58  | 0.81 | 1.50  |
| 10 | 0.07 | 0.27 | 2.63 | 2.55 | 0.42 | 1.32 | 0.62 | 1.23 | 0.33 | 1.59  | 0.79 | 1.48  |

Table 28: results of the carbon footprint: kg CO<sub>2</sub>-eq / m<sup>3</sup> for the motorised systems with a pumping yield of 25 and 50 m<sup>3</sup>/h and the water trucking (1) and (2) for all the timeframes (1 to 10 years). The colours show which one of the power systems (solar, short-running diesel, hybrid and long-running diesel) is the cleanest fixed the pumping yield and the timeframe. Green is the cleanest and yellow the dirtiest.

|   | 25_S | 25_Ds | 25_H | 25_DI | 50_S | 50_Ds | 50_H | 50_DI | 50_S2 | 50_Ds2 | 50_H2 | 50_DI2 | Truck (1) | Truck (2) |
|---|------|-------|------|-------|------|-------|------|-------|-------|--------|-------|--------|-----------|-----------|
| 1 | 2.14 | 2.87  | 2.31 | 2.44  | 1.61 | 1.92  | 1.80 | 1.78  | 1.55  | 1.87   | 1.74  | 1.73   | 2.79      | 1.12      |
| 2 | 1.07 | 2.10  | 1.43 | 1.92  | 0.81 | 1.41  | 1.08 | 1.37  | 0.78  | 1.38   | 1.06  | 1.34   | 2.66      | 1.12      |
| 3 | 0.72 | 1.89  | 1.14 | 1.72  | 0.54 | 1.27  | 0.85 | 1.21  | 0.52  | 1.25   | 0.83  | 1.19   | 2.59      | 1.12      |
| 4 | 0.54 | 1.75  | 0.99 | 1.64  | 0.40 | 1.17  | 0.73 | 1.14  | 0.39  | 1.16   | 0.72  | 1.13   | 2.57      | 1.12      |
| 5 | 0.43 | 1.66  | 0.92 | 1.58  | 0.32 | 1.12  | 0.67 | 1.09  | 0.31  | 1.11   | 0.66  | 1.08   | 2.55      | 1.12      |
| 6 | 0.36 | 1.63  | 0.86 | 1.58  | 0.27 | 1.10  | 0.62 | 1.09  | 0.26  | 1.09   | 0.61  | 1.08   | 2.58      | 1.12      |
| 7 | 0.32 | 1.58  | 0.82 | 1.55  | 0.24 | 1.07  | 0.59 | 1.06  | 0.23  | 1.06   | 0.58  | 1.05   | 2.56      | 1.12      |
| 8 | 0.28 | 1.55  | 0.79 | 1.53  | 0.21 | 1.05  | 0.56 | 1.05  | 0.20  | 1.04   | 0.55  | 1.04   | 2.55      | 1.12      |
| 9 | 0.25 | 1.54  | 0.77 | 1.51  | 0.19 | 1.04  | 0.55 | 1.03  | 0.18  | 1.03   | 0.54  | 1.02   | 2.54      | 1.12      |

Supporting information

|    |      |      |      |      |      |      |      |      |      |      |      |      |      |      |
|----|------|------|------|------|------|------|------|------|------|------|------|------|------|------|
| 10 | 0.22 | 1.57 | 0.75 | 1.50 | 0.17 | 1.06 | 0.53 | 1.02 | 0.16 | 1.05 | 0.52 | 1.02 | 2.54 | 1.12 |
|----|------|------|------|------|------|------|------|------|------|------|------|------|------|------|

## SM A.24 Water availability

Comparison of the Bidibidi and Imvepi settlements and results from the report called "GIS for Good - Optimal Site Selection for Refugee Camps in Uganda (Figure 35 and Figure 36): A GIS Based Methodology" for safe water coverage and crop suitability [20]. The crop suitability and water availability are just two of many parameters investigated in the report that investigate many environmental factors (distance to water, flood risk, drought risk, interannual water variability, safe water coverage, elevation, slope, land use and soil type-food suitability) and social factors (population density, poverty density, distance from borders, distance to roads, distance to health centres, distance to education facilities and distance to towns).

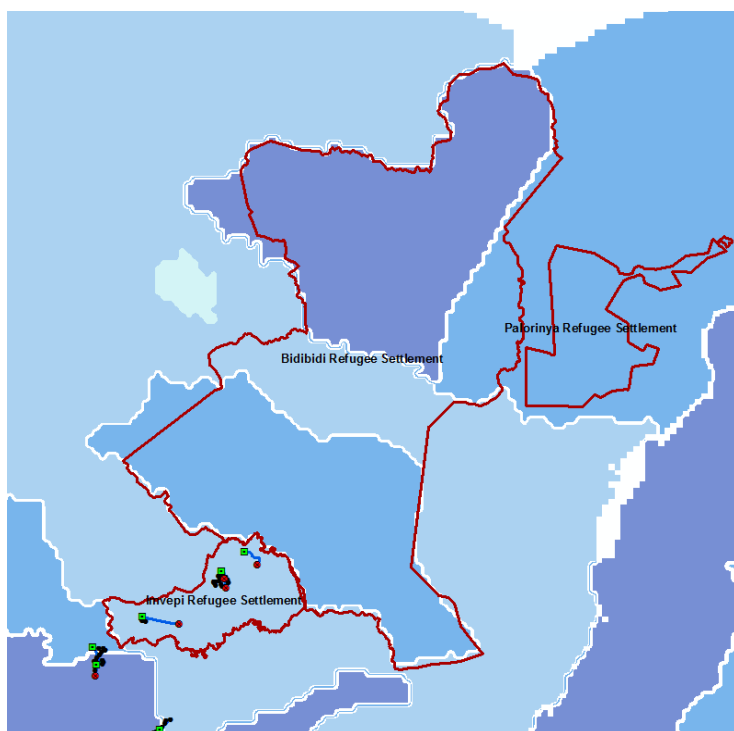

Figure 35: "Safe water coverage" of Bidibidi and Imvepi settlements based on Mong et al. (2014). Dark colours mean higher water coverage.

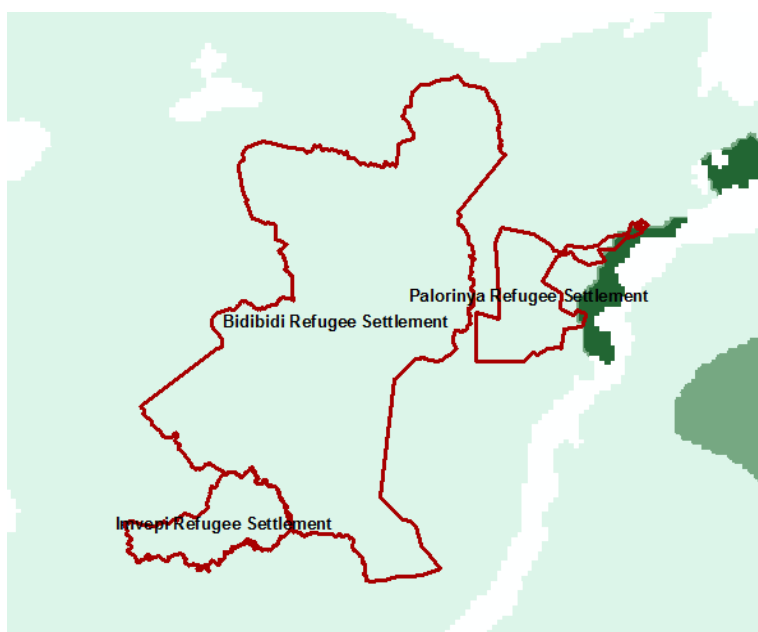

Figure 36: "Crop suitability" of the Bidibidi and Imvepi settlements based on Mong et al. (2014). Dark colours mean better crop suitability.

## Supporting information

## SM A.25 Hazard Analysis and Critical Control Points (HACCPs)

## Hand pump

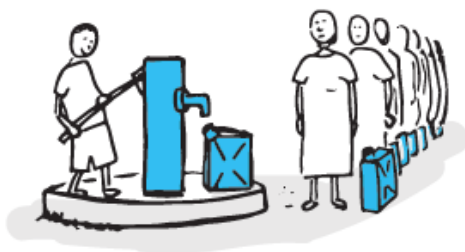

Drawing made by Iskandar Tange

|                              | Borehole & site                                                                                                                                                                                                                                                                                                                                                                                                                                                            | Pump                                                                                                                                                                                                           | Distribution & storage                                                                                                                                                                                                                                                                                                                                                                       |
|------------------------------|----------------------------------------------------------------------------------------------------------------------------------------------------------------------------------------------------------------------------------------------------------------------------------------------------------------------------------------------------------------------------------------------------------------------------------------------------------------------------|----------------------------------------------------------------------------------------------------------------------------------------------------------------------------------------------------------------|----------------------------------------------------------------------------------------------------------------------------------------------------------------------------------------------------------------------------------------------------------------------------------------------------------------------------------------------------------------------------------------------|
| <b>Hazard assessment</b>     |                                                                                                                                                                                                                                                                                                                                                                                                                                                                            |                                                                                                                                                                                                                |                                                                                                                                                                                                                                                                                                                                                                                              |
| <b>Design &amp; finance</b>  | N/A                                                                                                                                                                                                                                                                                                                                                                                                                                                                        | N/A                                                                                                                                                                                                            | N/A                                                                                                                                                                                                                                                                                                                                                                                          |
| <b>Construction</b>          |                                                                                                                                                                                                                                                                                                                                                                                                                                                                            |                                                                                                                                                                                                                |                                                                                                                                                                                                                                                                                                                                                                                              |
| <b>O&amp;M</b>               | <ul style="list-style-type: none"> <li>Infiltration of contaminated water into the aquifer</li> <li>Microbial attachment in the well casing</li> <li>Infiltration of contaminated water into the aquifer (from animal grazing, washing kids, latrines leaking)</li> </ul>                                                                                                                                                                                                  | <ul style="list-style-type: none"> <li>Microbial attachment to surface inside the pump (using dirty hands)</li> <li>Contamination of water used for the priming of the pump</li> </ul>                         | <ul style="list-style-type: none"> <li>Contamination of the water from the jerrycans</li> </ul>                                                                                                                                                                                                                                                                                              |
| <b>Disposal</b>              | N/A                                                                                                                                                                                                                                                                                                                                                                                                                                                                        | N/A                                                                                                                                                                                                            | N/A                                                                                                                                                                                                                                                                                                                                                                                          |
| <b>Questions and answers</b> |                                                                                                                                                                                                                                                                                                                                                                                                                                                                            |                                                                                                                                                                                                                |                                                                                                                                                                                                                                                                                                                                                                                              |
| <b>Design &amp; finance</b>  | N/A                                                                                                                                                                                                                                                                                                                                                                                                                                                                        | N/A                                                                                                                                                                                                            | N/A                                                                                                                                                                                                                                                                                                                                                                                          |
| <b>Construction</b>          |                                                                                                                                                                                                                                                                                                                                                                                                                                                                            |                                                                                                                                                                                                                |                                                                                                                                                                                                                                                                                                                                                                                              |
| <b>O&amp;M</b>               | <ul style="list-style-type: none"> <li>Can animals and people access it? How far are the latrines? Usually there is no protection of the handpumps; in some host communities, a simple divider made of branches was found.</li> <li>How well is the aquifer protected from surface? It depends on how the borehole was built</li> <li>Do you add a concrete casing? NGOs should.</li> <li>Do you do "shock chlorination" in the well to disinfect the well? No.</li> </ul> | <ul style="list-style-type: none"> <li>People don't use specific attention when pumping the water</li> <li>No problems regarding using contaminated water for the priming of the pump was observed.</li> </ul> | <ul style="list-style-type: none"> <li>Do people wash the jerrycans? NGOs run awareness campaigns about how to use properly the jerrycans. This study did not quantitatively assess the results of these awareness campaigns.</li> <li>Do people use the lids of the jerrycans to collect and store water? Very often lids were not found when collecting water at the tap stands</li> </ul> |
| <b>Disposal</b>              | N/A                                                                                                                                                                                                                                                                                                                                                                                                                                                                        | N/A                                                                                                                                                                                                            | N/A                                                                                                                                                                                                                                                                                                                                                                                          |

## Supporting information

### Motorised systems (Diesel and solar powered pumping systems with gravity distribution (pipes))

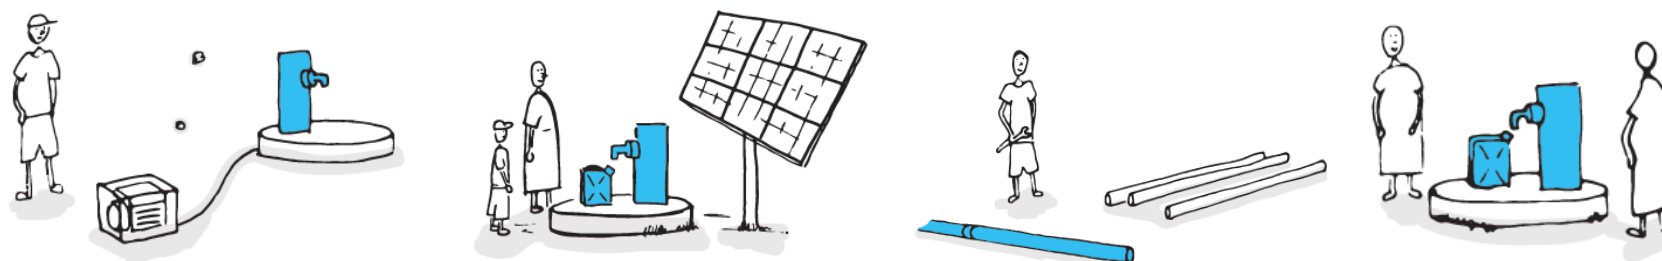

Drawings made by Iskandar Tange

|                             | Borehole & site                                                                                                                                                                                                                                                           | Pump                                                                                                                                                                                 | Distribution & storage                                                                                                                                                                                                                                                                                                                                                                                                                                                                                       |
|-----------------------------|---------------------------------------------------------------------------------------------------------------------------------------------------------------------------------------------------------------------------------------------------------------------------|--------------------------------------------------------------------------------------------------------------------------------------------------------------------------------------|--------------------------------------------------------------------------------------------------------------------------------------------------------------------------------------------------------------------------------------------------------------------------------------------------------------------------------------------------------------------------------------------------------------------------------------------------------------------------------------------------------------|
| <b>Hazard assessment</b>    |                                                                                                                                                                                                                                                                           |                                                                                                                                                                                      |                                                                                                                                                                                                                                                                                                                                                                                                                                                                                                              |
| <b>Design &amp; finance</b> | N/A                                                                                                                                                                                                                                                                       | N/A                                                                                                                                                                                  | N/A                                                                                                                                                                                                                                                                                                                                                                                                                                                                                                          |
| <b>Construction</b>         |                                                                                                                                                                                                                                                                           |                                                                                                                                                                                      |                                                                                                                                                                                                                                                                                                                                                                                                                                                                                                              |
| <b>O&amp;M</b>              | <ul style="list-style-type: none"> <li>Infiltration of contaminated water into the aquifer</li> <li>Microbial attachment in the well casing</li> <li>Infiltration of contaminated water into the aquifer (from animal grazing, washing kids, latrines leaking)</li> </ul> | <ul style="list-style-type: none"> <li>Contamination of water used for the priming of the pump</li> <li>Contamination of the environment due to the diesel or oil leakage</li> </ul> | <u>Jerrycans</u> <ul style="list-style-type: none"> <li>Contamination of the water from the jerrycans</li> </ul> <u>Distribution systems and storage tanks</u> <ul style="list-style-type: none"> <li>Contamination of pumped water if people add their own pipes</li> <li>Contamination of the water in the pipes if not continuously under pressure and in case of leakage from the single pit latrines.</li> <li>Contamination of the water in the storage tanks if people add their own pipes</li> </ul> |
| <b>Disposal</b>             | N/A                                                                                                                                                                                                                                                                       | <ul style="list-style-type: none"> <li>Contamination of the environment by an unsound disposal of the solar panels or of the diesel generator.</li> </ul>                            | N/A                                                                                                                                                                                                                                                                                                                                                                                                                                                                                                          |
| <b>Hazard assessment</b>    |                                                                                                                                                                                                                                                                           |                                                                                                                                                                                      |                                                                                                                                                                                                                                                                                                                                                                                                                                                                                                              |
| <b>Design &amp; finance</b> | N/A                                                                                                                                                                                                                                                                       | N/A                                                                                                                                                                                  | N/A                                                                                                                                                                                                                                                                                                                                                                                                                                                                                                          |
| <b>Construction</b>         |                                                                                                                                                                                                                                                                           |                                                                                                                                                                                      | <u>Distribution systems and storage tanks</u> <ul style="list-style-type: none"> <li>How deep in the ground, are the pipes built? <b>Usually pipes are installed 1 meter deep in the ground. There were cases the pipes were less than a meter. No specific issues</b></li> </ul>                                                                                                                                                                                                                            |

## Supporting information

|                 |                                                                                                                                                                                                                                                                                                                                                                                                                                                                                                                     |                                                                                                                                                                                                                                                    |                                                                                                                                                                                                                                                                                                                                                                                                                                                                                                                                                                                                                                                                                                                                                                                                                                                                                                                                                                                                                                                                                                                                                                                                                                                                                                                                   |
|-----------------|---------------------------------------------------------------------------------------------------------------------------------------------------------------------------------------------------------------------------------------------------------------------------------------------------------------------------------------------------------------------------------------------------------------------------------------------------------------------------------------------------------------------|----------------------------------------------------------------------------------------------------------------------------------------------------------------------------------------------------------------------------------------------------|-----------------------------------------------------------------------------------------------------------------------------------------------------------------------------------------------------------------------------------------------------------------------------------------------------------------------------------------------------------------------------------------------------------------------------------------------------------------------------------------------------------------------------------------------------------------------------------------------------------------------------------------------------------------------------------------------------------------------------------------------------------------------------------------------------------------------------------------------------------------------------------------------------------------------------------------------------------------------------------------------------------------------------------------------------------------------------------------------------------------------------------------------------------------------------------------------------------------------------------------------------------------------------------------------------------------------------------|
|                 |                                                                                                                                                                                                                                                                                                                                                                                                                                                                                                                     |                                                                                                                                                                                                                                                    | <ul style="list-style-type: none"> <li>Material of the distribution pipes? <b>HDPE. The lifetime of the pipes was assumed to be 10 years if the construction was proper.</b></li> <li>Are the pipes close to sewage pipes or latrines? <b>There were some considerations regarding the distance between the borehole and the latrines but very often latrines were built by the refugees just closed to their home.</b></li> </ul>                                                                                                                                                                                                                                                                                                                                                                                                                                                                                                                                                                                                                                                                                                                                                                                                                                                                                                |
| <b>O&amp;M</b>  | <ul style="list-style-type: none"> <li>Can animals and people access it? How far are the latrines? <b>Motorised boreholes are protected with some a fence.</b></li> <li>How well is the aquifer protected from surface? <b>It depends on how the borehole was built but it seems NGOs put more attention on drilling boreholes for motorised pumps.</b></li> <li>Do you add a concrete casing? <b>NGOs should.</b></li> <li>Do you do "shock chlorination" in the well to disinfect the well? <b>No.</b></li> </ul> | <ul style="list-style-type: none"> <li>Do people fetch the water at the pumping site? <b>No, the boreholes are more isolated since the water is pumped into the storage tanks but people don't fetch directly at the borehole site.</b></li> </ul> | <p>[Jerrycans, same as above]</p> <p><u>Distribution systems and storage tanks</u></p> <ul style="list-style-type: none"> <li>Do people add their own pipes? <b>No, because pipes were always under the ground.</b></li> <li>At which control point do they add chlorine? <b>Always at the pumping site</b></li> <li>Do they add a constant amount of chlorine or does it vary (depending on what?) <b>They add always the same amount of chlorine depending on the amount of residual chlorine. End users can complain in case the chlorine is too high.</b></li> <li><b>No O&amp;M activities for the pipes were planned. If there was a leakage, NGOs would assume the community would contact them seeing the water coming out from the pipe.</b></li> </ul> <p><u>End users tap stands</u></p> <ul style="list-style-type: none"> <li>How do they check if chlorination is working? <b>The NGOs check the residual chlorine always at the tap stand</b></li> <li>Do they measure residual chlorine? How often? <b>Yes, the responsible NGOs (or the water committees) was measuring residual chlorine every day. In case of cholera outbreak, E. coli count was done every day until the end of the emergency.</b></li> <li>Do people add their own water hose to the tap? <b>Not seen during the field trip.</b></li> </ul> |
| <b>Disposal</b> | N/A                                                                                                                                                                                                                                                                                                                                                                                                                                                                                                                 | N/A                                                                                                                                                                                                                                                | N/A                                                                                                                                                                                                                                                                                                                                                                                                                                                                                                                                                                                                                                                                                                                                                                                                                                                                                                                                                                                                                                                                                                                                                                                                                                                                                                                               |

## Supporting information

### Water trucking

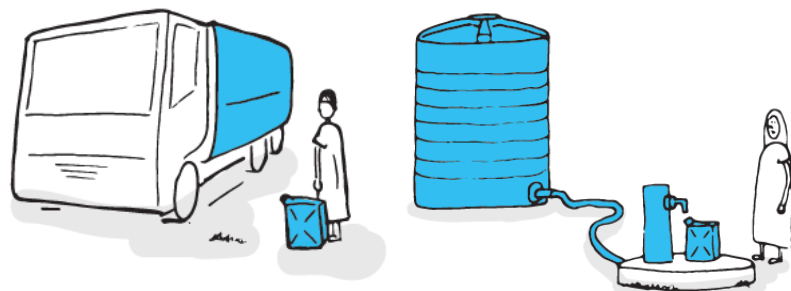

Drawings made by Iskandar Tange

| Control point                   | Note                                                                                                    | What to do                                                                                                                                                        |
|---------------------------------|---------------------------------------------------------------------------------------------------------|-------------------------------------------------------------------------------------------------------------------------------------------------------------------|
| <b>Borehole and site</b>        |                                                                                                         |                                                                                                                                                                   |
| 1. Water source                 | If centralised water treatment plant, outside the scope of the project<br>If high yield pump, as before | <ul style="list-style-type: none"> <li>% water trucked</li> <li>What is the source of water trucking?</li> <li>How many km/hours of driving each time?</li> </ul> |
| <b>Pump</b>                     |                                                                                                         |                                                                                                                                                                   |
| <b>Distribution and storage</b> |                                                                                                         |                                                                                                                                                                   |
| 2. Water truck                  | Considered as a water storage – same as water tank                                                      | See before                                                                                                                                                        |



## Reference

1. UNHCR *Road map for the implementation of the comprehensive refugee response framework in Uganda. 2018-2020*; 2018;
2. Tange, I. A design approach to rethinking the assessment of water provision systems - The case of the Bidi Bidi refugee settlement in Northern Uganda, Technical University of Denmark (DTU), 2017.
3. Kansiime, M. K.; Mastenbroek, A. Enhancing resilience of farmer seed system to climate-induced stresses: Insights from a case study in West Nile region, Uganda. *J. Rural Stud.* **2016**, *47*, 220–230, doi:<http://dx.doi.org/10.1016/j.jrurstud.2016.08.004>.
4. Parajuli, R.; Pokharel, G. R.; Østergaard, P. A. A comparison of diesel, biodiesel and solar PV-based water pumping systems in the context of rural Nepal. *Int. J. Sustain. Energy* **2014**, *33*, 536–553, doi:[10.1080/14786451.2012.761221](https://doi.org/10.1080/14786451.2012.761221).
5. Godskesen, B.; Hauschild, M.; Rygaard, M.; Zambrano, K.; Albrechtsen, H. J. Life-cycle and freshwater withdrawal impact assessment of water supply technologies. *Water Res.* **2013**, *47*, 2363–2374, doi:[10.1016/j.watres.2013.02.005](https://doi.org/10.1016/j.watres.2013.02.005).
6. Engineering ToolBox; The Engineering ToolBox PVC and CPVC Pipes - Schedule 40 & 80 [online] Available online: [http://www.engineeringtoolbox.com/pvc-cpvc-pipes-dimensions-d\\_795.html](http://www.engineeringtoolbox.com/pvc-cpvc-pipes-dimensions-d_795.html) (accessed on Mar 11, 2018).
7. Metalfil Peso rete elettrosaldata fabbricata con filo liscio [in Italian] Available online: <http://www.metalfil.it/it/peso-rete-elettrosaldata> (accessed on Mar 26, 2018).
8. Stockyards Ranch Supply Steel T-Posts & Barbed Wire Available online: <http://stockyardsupply.com/index.php/fencing/steel-t-posts-barbed-wire/> (accessed on Mar 26, 2018).
9. Grundfos SW 260 - 98900546 Available online: <https://product-selection.grundfos.com/product-detail/product-detail.html?freq=50&lang=USA&productnumber=98900546> (accessed on Mar 26, 2018).
10. The Engineering ToolBox Metals and Alloys - Densities [online] Available online: [https://www.engineeringtoolbox.com/metal-alloys-densities-d\\_50.html](https://www.engineeringtoolbox.com/metal-alloys-densities-d_50.html) (accessed on Mar 26, 2018).
11. Trani, M. L.; Bossi, B.; Gangolells, M.; Casals, M. Predicting fuel energy consumption during earthworks. *J. Clean. Prod.* **2016**, *112*, 3798–3809, doi:[10.1016/j.jclepro.2015.08.027](https://doi.org/10.1016/j.jclepro.2015.08.027).
12. Thaipipe HDPE pipes Available online: <http://www.thaipipe.com/products&services/hdpepipe.htm> (accessed on Mar 26, 2016).
13. Environment Canada Emergencies Science and Technology Division Lubricating Oil (Engine, Marine Diesel) Available online: [http://www.etc-cte.ec.gc.ca/databases/OilProperties/pdf/WEB\\_Lubricating\\_Oil\\_\(Engine\\_Marine\\_Diesel\).pdf](http://www.etc-cte.ec.gc.ca/databases/OilProperties/pdf/WEB_Lubricating_Oil_(Engine_Marine_Diesel).pdf) (accessed on Mar 26, 2018).
14. LIPASTO LIPASTO unit emissions database Available online: <http://lipasto.vtt.fi/yksikkopaastot/indexe.htm> (accessed on Jan 24, 2018).
15. LIPASTO Semi trailer combination - Gross vehicle mass 40t, pay load capacity 25t - Urban driving, streets Available online: <http://lipasto.vtt.fi/yksikkopaastot/tavaraliikenne/tieliikenne/kappkatue.htm> (accessed on May 9, 2018).
16. Havelaar, A. H. Application of HACCP to drinking water supply. *Food Control* **1994**, *5*, 145–152, doi:[10.1016/0956-7135\(94\)90074-4](https://doi.org/10.1016/0956-7135(94)90074-4).
17. Hellier, K. Hazard Analysis and Critical Control Points. In *63rd Annual Water Industry Engineers and Operators' Conference Civic Centre - Warrnambool 6 and 7 September, 2000*; 2000.
18. Ugandarefugees Statistical summary - Refugees and Asylum Seekers in Uganda as of 31 October 2017 2017.
19. UNHCR; UNOPS *Terms of Reference for Feasibility Study, Preliminary and Detailed Design for Integrated Water Supply in Bidi Bidi Settlement and Neighboring Host Community - LOT 1*; 2017;

**Supporting information**

---

20. Mong, C.; Nelson, C.; Oni, M. *GIS for Good - Optimal Site Selection for Refugee Camps in Uganda: A GIS Based Methodology*; 2014;
