# Supplementary material
Source: MDPI journal article supplement (https://www.mdpi.com/2073-4441/10/10/1493)
Supplement: s1 [file s1]

Archive with 3 entries (3 files):
- SM A.pdf
- SM B - Model for Life Cycle Costing.xlsx
- SM C - Results of the LCC & carbon footprint.xlsx
