# Supplementary material
Source: MDPI journal article supplement (https://www.mdpi.com/2073-4441/10/10/1493)
Supplement: s1 [file s1 › SM B - Model for Life Cycle Costing.xlsx]

## Sheet: Intro
Supplementary Material B
This excel sheet can be used to calculate Life Cycle Costing of similar water pumping solution as in the article "A multi-criteria assessment of water supply in Ugandan refugee settlements."
Excel sheet	What to do and what is it
Data!A1	This is where the user can add and modify all the data needed for the analysis. Before starting to use the sheet, please check that the data are correct!
Costs_TOT!A1	Here is where the user can see the total costs year after year divided in capital costs, yearly maintenance and major maintenance
Costs_per m3'!A1	Here is where the user can see the costs per m3 of water pumped for different timeframe of operation
Graph!A1	Here there is a pre-made graph

## Sheet: Data
	Unit	Solar	Diesel, short	Diesel, long	Hybrid
Pumping yield, borehole	m3/h	10	10	10	10
Hours/day_tot	h/day	7	7	12	12
Hours/day solar panels	h/day	7	0	0	7
Hours/day diesel generator	h/day	0	7	12	5
Water pumped	m3/day	70	70	120	120
Water pumped	m3/year	25550	25550	43800	43800
Population served	people	4666.67	4666.67	8000	8000
UGX		Unit of all the costs in this excel file
15	l/person/day	Liters per person per day the system was designed for
25028	UGX / m3	Cost of WATER TRUCKING per m3
CAPEX (construction costs)
Cost of the entire solar powered system system
9.23043e+08	UGX	- Hydro-geological investigation, drilling the borehole (6’’ if low yield, 8’’ if high yield), borehole drilling, pipes screen casting, cement grouting, gravel park, compressor, concrete, - Concrete platform, construction of the security fence, chain link, gate, columns, guard’s house, generator cage (if diesel powered or hybrid), water borne toilet, dosing house, - Submersible pump, chlorination…
Which costs of the SOLAR system are NOT included in the DIESEL generator system?
164018600	UGX	E.g. solar panels, metallic structure for the solar panels, inverter, transportation of solar panels, etc.
Which costs of the DIESEL system are NOT included in the SOLAR powered system?
49120000	UGX	Diesel Genset
1.37767e+07	UGX	Other (e.g. plinth for the generator, battery, etc.)
6.28967e+07	UGX	TOT
4.96014e+08	UGX	Costs of the distribution system when the WATER PUMPED IS EQUAL THAN THE SOLAR Distribution system: General clearance along pipeline and preparation of the site; excavation of the renches, management of the excavated material; supply, lay and set distribution and transmission pipes, taps and stand posts; plumbing accessories; supply and installation of steel tanks and tower, civil costs related t…
7.243e+08	UGX	Costs of the distribution system when the WATER PUMPED IS HIGHER THAN THE SOLAR Distribution system: General clearance along pipeline and preparation of the site; excavation of the renches, management of the excavated material; supply, lay and set distribution and transmission pipes, taps and stand posts; plumbing accessories; supply and installation of steel tanks and tower, civil costs related …
9.23043e+08	UGX	CAPEX TOT solar
8.21921e+08	UGX	CAPEX tot diesel, short (same water pumped as in the solar)
1.05021e+09	UGX	CAPEX tot diesel, long (bigger quantity of water pumped than the solar)
1.21422e+09	UGX	CAPEX tot hybrid (same water demand as diesel ,long)
O&M activities
Yearly O&M common
In common
1	mg/l	Concentration chlorine
27800	UGX / kg	Cost of chlorine
310000	UGX / month	Salary of pump attendants and pump guards
7	number	No of pump attendands and pump guards
26040000	UGX / year	TOT cost for pump attendants and pump guards
900000	UGX / year	Other (e.g. protective gears for the workers)
27650290	UGX / year	TOT solar & diesel, short
28157640	UGX / year	TOT diesel, long & hybrid
Solar powered system
2.15827e+06	UGX / year	General maintenace
1.79856e+06	UGX / year	Contingencies
899281	UGX / year	Cleaning and repainting of the steel tanks
0	UGX / year	Other…
4.85612e+06	UGX / year	TOT
Diesel powered system
2.69784e+06	UGX / year	Contingencies
899281	UGX / year	Cleaning and repainting of the steel tanks
3000	UGX / liter	Cost of fuel
4	l/h	Diesel consumption of the genset per hour
75000	UGX / richarge	Cost of the oil richarge
150	Hours/richarge	After how many hours it is necessary to change the oil
45000	UGX / richarge	Cost of the oil filter
150	Hours/richarge	After how many hours it is necessary to change the oil filter
35000	UGX / richarge	Cost of the diesel filter
150	Hours/richarge	After how many hours it is necessary to change the diesel filter
50000	UGX / richarge	Cost of the air filter
500	Hours/richarge	After how many hours it is necessary to change the air filter
	UGX / year	Other…
3.71528e+07	UGX / year	TOT diesel, short
6.11211e+07	UGX / year	TOT diesel, long
2.75655e+07	UGX / year	TOT hybrid
Major O&M
Submersible pump
17193780	UGX	Cost of the submersible pump
20440	hours	Lifetime of the submersible pump
Solar
12308580	UGX	Cost of the inverter
7	year	Lifetime of the submersible pump
Diesel
19158000	UGX	Cost of the genset overhaul (here 30% of the tot cost)
7500	Hours	After how many years, it is necessary to do an overhaul
63000000	UGX	Cost of the genset + transport + installation
25000	Hours	Lifetime of the genset
Hybrid
1770000	UGX	Cost of the switch (between solar and diesel)
5	Year	After how many years, it is necessary to change the switch

## Sheet: Costs_TOT
	Solar	Diesel, short	Diesel, long	Hybrid
Pumping yield, borehole	10	10	10	10
Hours/day_tot	7	7	12	12
Hours/day solar panels	7	0	0	7
Hours/day diesel generator	0	7	12	5
m3 water/day	70	70	120	120
m3 water/year	25550	25550	43800	43800
Population served	4666.67	4666.67	8000	8000
	Solar					Diesel, short					Diesel, long					Hybrid
Year	CapEx	Yearly O&M	Capital Maint	TOT costs		CapEx	Yearly O&M	Capital Maint	TOT costs		CapEx	Yearly O&M	Capital Maint	TOT costs		CapEx	Yearly O&M	Capital Maint	TOT costs									[help coloumn]
	UGX	UGX	UGX	UGX		UGX	UGX	UGX	UGX		UGX	UGX	UGX	UGX		UGX	UGX	UGX	UGX
1	9.23043e+08	3.25064e+07	0	9.55549e+08		8.21921e+08	6.48031e+07	0	8.86724e+08		1.05021e+09	8.92788e+07	0	1.13948e+09		1.21422e+09	5.57231e+07	0	1.26995e+09									1
2		3.25064e+07	0	3.25064e+07			6.48031e+07	0	6.48031e+07			8.92788e+07	19158000	1.08437e+08			5.57231e+07	0	5.57231e+07									2
3		3.25064e+07	0	3.25064e+07			6.48031e+07	19158000	8.39611e+07			8.92788e+07	0	8.92788e+07			5.57231e+07	0	5.57231e+07									3
4		3.25064e+07	0	3.25064e+07			6.48031e+07	0	6.48031e+07			8.92788e+07	19158000	1.08437e+08			5.57231e+07	0	5.57231e+07									4
5		3.25064e+07	0	3.25064e+07			6.48031e+07	0	6.48031e+07			8.92788e+07	17193780	1.06473e+08			5.57231e+07	38121780	9.38449e+07									5
6		3.25064e+07	0	3.25064e+07			6.48031e+07	19158000	8.39611e+07			8.92788e+07	63000000	1.52279e+08			5.57231e+07	0	5.57231e+07									6
7		3.25064e+07	12308580	4.4815e+07			6.48031e+07	0	6.48031e+07			8.92788e+07	19158000	1.08437e+08			5.57231e+07	12308580	6.80317e+07									7
8		3.25064e+07	17193780	4.97002e+07			6.48031e+07	17193780	8.19969e+07			8.92788e+07	0	8.92788e+07			5.57231e+07	0	5.57231e+07									8
9		3.25064e+07	0	3.25064e+07			6.48031e+07	19158000	8.39611e+07			8.92788e+07	19158000	1.08437e+08			5.57231e+07	19158000	7.48811e+07									9
10		3.25064e+07	0	3.25064e+07			6.48031e+07	63000000	1.27803e+08			8.92788e+07	17193780	1.06473e+08			5.57231e+07	18963780	7.46869e+07									10
11		3.25064e+07	0	3.25064e+07			6.48031e+07	0	6.48031e+07			8.92788e+07	19158000	1.08437e+08			5.57231e+07	0	5.57231e+07									11
12		3.25064e+07	0	3.25064e+07			6.48031e+07	19158000	8.39611e+07			8.92788e+07	63000000	1.52279e+08			5.57231e+07	0	5.57231e+07									12
13		3.25064e+07	0	3.25064e+07			6.48031e+07	0	6.48031e+07			8.92788e+07	0	8.92788e+07			5.57231e+07	19158000	7.48811e+07									13
14		3.25064e+07	12308580	4.4815e+07			6.48031e+07	0	6.48031e+07			8.92788e+07	19158000	1.08437e+08			5.57231e+07	75308580	1.31032e+08									14
15		3.25064e+07	0	3.25064e+07			6.48031e+07	19158000	8.39611e+07			8.92788e+07	17193780	1.06473e+08			5.57231e+07	18963780	7.46869e+07									15
16		3.25064e+07	17193780	4.97002e+07			6.48031e+07	17193780	8.19969e+07			8.92788e+07	19158000	1.08437e+08			5.57231e+07	0	5.57231e+07									16
17		3.25064e+07	0	3.25064e+07			6.48031e+07	0	6.48031e+07			8.92788e+07	0	8.92788e+07			5.57231e+07	19158000	7.48811e+07									17
18		3.25064e+07	0	3.25064e+07			6.48031e+07	19158000	8.39611e+07			8.92788e+07	63000000	1.52279e+08			5.57231e+07	0	5.57231e+07									18
19		3.25064e+07	0	3.25064e+07			6.48031e+07	0	6.48031e+07			8.92788e+07	36351780	1.25631e+08			5.57231e+07	17193780	7.29169e+07									19
20		3.25064e+07	0	3.25064e+07			6.48031e+07	63000000	1.27803e+08			8.92788e+07	0	8.92788e+07			5.57231e+07	1770000	5.74931e+07									20
	Solar					Diesel, short					Diesel, long					Hybrid
	UGX	year				UGX	year				UGX	year				UGX	year
CAPEX	9.23043e+08					8.21921e+08					1.05021e+09					1.21422e+09
Yearly running costs	3.25064e+07					6.48031e+07					8.92788e+07					5.57231e+07
Pump replacement	17193780	8				17193780	8				17193780	4.66667				17193780	4.66667
Genset overhaul		100				19158000	2.93542				19158000	1.71233				19158000	4.10959
Genset replacement		100				63000000	9.78474				63000000	5.70776				63000000	13.6986
Inverter replacement	12308580	7					100					100				12308580	7
Switch between solar and hybris		100					100					100				1770000	5

## Sheet: Costs_per m3
	Solar	Diesel, short	Diesel, long	Hybrid	Water trucking
Hours per day	7	7	12	12
m3/day	70	70	120	120
m3 / year	25550	25550	43800	43800
TOT Capex	9.23043e+08	8.21921e+08	1.05021e+09	1.21422e+09
1st year O&M	3.25064e+07	6.48031e+07	8.92788e+07	5.57231e+07
TOT capex + 1st year O&M	9.55549e+08	8.86724e+08	1.13948e+09	1.26995e+09
DISCOUNT RATE	0						DISCOUNT RATE	0.12
CUMULATIVE COSTS PER M3 OF WATER [UGX / m3]							CUMULATIVE COSTS PER M3 OF WATER [UGX / m3]
	UGX / m3	UGX / m3	UGX / m3	UGX / m3	UGX / m3			UGX / m3	UGX / m3	UGX / m3	UGX / m3	UGX / m3
	Solar	Diesel, short	Diesel, long	Hybrid	Truck			Solar	Diesel, short	Diesel, long	Hybrid	Truck
1	37399.2	34705.4	26015.6	28994.2	25028		1	37399.2	34705.4	26015.6	28994.2	25028
2	19335.7	18620.9	14245.7	15133.2	25028		2	20358.2	19531.3	14911.9	15917.8	22346.4
3	13314.6	13509.3	10176.6	10512.9	25028		3	14702.1	14717.1	11096.8	11577.6	19952.2
4	10304	10766.1	8251.35	8202.72	25028		4	11892.1	12168.4	9293	9421.36	17814.4
5	8497.65	9120.11	7087.26	6990.69	25028		5	10220.4	10652.3	8212.84	8275.61	15905.7
6	7293.42	8147.78	6485.5	6037.61	25028		6	9117.8	9744.56	7629.22	7412.61	14201.6
7	6502.07	7346.15	5912.67	5396.99	25028		7	8387.91	9030.1	7118.42	6831.85	12680
8	5932.47	6829.04	5428.38	4881.39	25028		8	7864.1	8556.85	6705.39	6379.83	11321.4
9	5414.67	6435.38	5100.31	4528.97	25028		9	7417.98	8200.13	6419.13	6063.76	10108.4
10	5000.43	6292.05	4833.36	4246.59	25028		10	7067.77	8017.9	6191.87	5815.39	9025.35
YEARLY COSTS [UGX / year]							YEARLY COSTS [UGX / year]
	UGX / year	UGX / year	UGX / year	UGX / year				UGX / year	UGX / year	UGX / year	UGX / year
	Solar	Diesel, short	Diesel, long	Hybrid				Solar	Diesel, short	Diesel, long	Hybrid
1	9.55549e+08	8.86724e+08	1.13948e+09	1.26995e+09			1	9.55549e+08	8.86724e+08	1.13948e+09	1.26995e+09
2	3.25064e+07	6.48031e+07	1.08437e+08	5.57231e+07			2	2.90236e+07	5.78599e+07	9.68185e+07	4.97528e+07
3	3.25064e+07	8.39611e+07	8.92788e+07	5.57231e+07			3	2.59139e+07	6.69333e+07	7.11725e+07	4.44221e+07
4	3.25064e+07	6.48031e+07	1.08437e+08	5.57231e+07			4	2.31374e+07	4.61256e+07	7.71831e+07	3.96626e+07
5	3.25064e+07	6.48031e+07	1.06473e+08	9.38449e+07			5	2.06584e+07	4.11835e+07	6.76652e+07	5.96401e+07
6	3.25064e+07	8.39611e+07	1.52279e+08	5.57231e+07			6	1.8445e+07	4.76418e+07	8.64071e+07	3.16188e+07
7	4.4815e+07	6.48031e+07	1.08437e+08	6.80317e+07			7	2.27047e+07	3.28313e+07	5.49374e+07	3.4467e+07
8	4.97002e+07	8.19969e+07	8.92788e+07	5.57231e+07			8	2.24818e+07	3.70912e+07	4.03852e+07	2.52063e+07
9	3.25064e+07	8.39611e+07	1.08437e+08	7.48811e+07			9	1.31288e+07	3.39105e+07	4.37958e+07	3.02432e+07
10	3.25064e+07	1.27803e+08	1.06473e+08	7.46869e+07			10	1.17221e+07	4.60871e+07	3.83951e+07	2.69328e+07
YEARLY WATER PRODUCTION [m3/year]							YEARLY WATER PRODUCTION [m3/year]
	m3/y	m3/y	m3/y	m3/y				m3/y	m3/y	m3/y	m3/y
	Solar	Diesel, short	Diesel, long	Hybrid				Solar	Diesel, short	Diesel, long	Hybrid
1	25550	25550	43800	43800			1	25550	25550	43800	43800
2	25550	25550	43800	43800			2	22812.5	22812.5	39107.1	39107.1
3	25550	25550	43800	43800			3	20368.3	20368.3	34917.1	34917.1
4	25550	25550	43800	43800			4	18186	18186	31176	31176
5	25550	25550	43800	43800			5	16237.5	16237.5	27835.7	27835.7
6	25550	25550	43800	43800			6	14497.8	14497.8	24853.3	24853.3
7	25550	25550	43800	43800			7	12944.4	12944.4	22190.4	22190.4
8	25550	25550	43800	43800			8	11557.5	11557.5	19812.9	19812.9
9	25550	25550	43800	43800			9	10319.2	10319.2	17690.1	17690.1
10	25550	25550	43800	43800			10	9213.59	9213.59	15794.7	15794.7
CUMULATIVE WATER PRODUCTION [m3]							CUMULATIVE WATER PRODUCTION [m3]
	m3	m3	m3	m3				m3	m3	m3	m3
	Solar	Diesel, short	Diesel, long	Hybrid				Solar	Diesel, short	Diesel, long	Hybrid
1	25550	25550	43800	43800			1	25550	25550	43800	43800
2	51100	51100	87600	87600			2	48362.5	48362.5	82907.1	82907.1
3	76650	76650	131400	131400			3	68730.8	68730.8	117824	117824
4	102200	102200	175200	175200			4	86916.8	86916.8	149000	149000
5	127750	127750	219000	219000			5	103154	103154	176836	176836
6	153300	153300	262800	262800			6	117652	117652	201689	201689
7	178850	178850	306600	306600			7	130596	130596	223880	223880
8	204400	204400	350400	350400			8	142154	142154	243693	243693
9	229950	229950	394200	394200			9	152473	152473	261383	261383
10	255500	255500	438000	438000			10	161687	161687	277177	277177
CUMULATIVE COSTS [UGX]							CUMULATIVE COSTS [UGX]
	UGX	UGX	UGX	UGX				UGX	UGX	UGX	UGX
	Solar	Diesel, short	Diesel, long	Hybrid				Solar	Diesel, short	Diesel, long	Hybrid
1	9.55549e+08	8.86724e+08	1.13948e+09	1.26995e+09			1	9.55549e+08	8.86724e+08	1.13948e+09	1.26995e+09
2	9.88055e+08	9.51527e+08	1.24792e+09	1.32567e+09			2	9.84573e+08	9.44584e+08	1.2363e+09	1.3197e+09
3	1.02056e+09	1.03549e+09	1.3372e+09	1.38139e+09			3	1.01049e+09	1.01152e+09	1.30748e+09	1.36412e+09
4	1.05307e+09	1.10029e+09	1.44564e+09	1.43712e+09			4	1.03362e+09	1.05764e+09	1.38466e+09	1.40379e+09
5	1.08557e+09	1.16509e+09	1.55211e+09	1.53096e+09			5	1.05428e+09	1.09883e+09	1.45232e+09	1.46343e+09
6	1.11808e+09	1.24906e+09	1.70439e+09	1.58669e+09			6	1.07273e+09	1.14647e+09	1.53873e+09	1.49504e+09
7	1.1629e+09	1.31386e+09	1.81283e+09	1.65472e+09			7	1.09543e+09	1.1793e+09	1.59367e+09	1.52951e+09
8	1.2126e+09	1.39586e+09	1.9021e+09	1.71044e+09			8	1.11791e+09	1.21639e+09	1.63405e+09	1.55472e+09
9	1.2451e+09	1.47982e+09	2.01054e+09	1.78532e+09			9	1.13104e+09	1.2503e+09	1.67785e+09	1.58496e+09
10	1.27761e+09	1.60762e+09	2.11701e+09	1.86001e+09			10	1.14276e+09	1.29639e+09	1.71624e+09	1.61189e+09
