# Supplementary material
Source: MDPI journal article supplement (https://www.mdpi.com/2073-4441/10/10/1493)
Supplement: s1 [file s1 › SM C - Results of the LCC & carbon footprint.xlsx]

## Sheet: INTRO
Supplementary Material C
This excel sheet show all the results of the article "A multi-criteria assessment of water supply in Ugandan refugee settlements.".
For more information on the data used in the excel sheet, please refer to the article.
Breakeven year: the year in which one alternative becomes cheaper than another alternative.
SHEETS IN THE DOCUMENT
Excel sheet	Content		CONCLUSIONS
Costs_USD!A1	It describes the costs (investment + O&M) in USD for 10 years for all the systems. The table at raws 71-83 shows the costs USD / m3.		- The breakeven year depends on which types of system we are comparing. - As expected, operating an operating a diesel pump for 7 hours is always more expensive than operating it for 10 or 12 hours - The breakeven year is always earlier when comparing solar versus diesel (7 hours) than when comparing hybrid versus diesel (10/12 hours). The former is between 3 and 5 years (longest in case of 50m3/…
Costs_UGX!A1	Same as above in UGX
O&M_USD'!A1	It describes only the Operation and Maintenance costs in USD for 10 years for all the systems. The table at raws 71-83 shows the costs in UGX / m3.		In general, the solar is the cheaper, followed by the hybrid (7 hours solar + 5 hours diesel), followed by the diesel running for 10/12 hours and last the diesel running for 5 hours.
O&M_UGX'!A1	Same as above in UGX
O&M_analysis'!A1	Analysis of the Operation & Maintenance costs. From raw 83, the O&M costs are split in salary, fuel, minor O&M and major maintenance.		The O&M costs for the solar systems are the cheapest followed by hybrid systems, and diesel powered systems.
Carbon footprint'!A1	Results of the total		The major impact is due to the diesel combustion in the diesel powered generator and in the water trucks Hand pump appears to cause the lowest quantity of CO2 equivalent. In case of motorised systems, solar power is the cleanest technology followed by hybrid pumping.
Characteristics of the alternatives modelled MODELLED
	Pump	Pumping yield	Hours
HP	Hand pump	0.8	12
2_S	Solar pump	2	7
2_Ds	Diesel pump_short	2	7
2_Dl	Diesel pump_long	2	10
5_S	Solar pump	5	7
5_Ds	Diesel pump_short	5	7
5_H	Hybrid (solar 7 hours, diesel 3 hours)	5	10
5_Dl	Diesel pump_long	5	10
10_S	Solar pump	10	7
10_Ds	Diesel pump_short	10	7
10_H	Hybrid (solar 7 hours, diesel 5 hours)	10	12
10_Dl	Diesel pump_long	10	12
25_S	Solar pump	25	7
25_Ds	Diesel pump_short	25	7
25_H	Hybrid (solar 7 hours, diesel 5 hours)	25	12
25_Dl	Diesel pump_long	25	12
50_S	Solar pump	50	7
50_Ds	Diesel pump_short	50	7
50_H	Hybrid (solar 7 hours, diesel 5 hours)	50	12
50_Dl	Diesel pump_long	50	12
50_S2	Solar pump	50	7
50_Ds2	Diesel pump_short	50	7
50_H2	Hybrid (solar 7 hours, diesel 5 hours)	50	12
50_Dl2	Diesel pump_long	50	12
Truck (1)	Water trucking if the water source was modelled with a borehole with a pumping yield of 25 m3/h and pumped by a diesel generator for 12 hours a day.	25	12
Truck (2)	Water trucking if there were no costs due to the water pumping.

## Sheet: Costs_USD
	HP	2_S	2_Ds	2_Dl	5_S	5_Ds	5_H	5_Dl	10_S	10_Ds	10_H	10_Dl	25_S	25_Ds	25_H	25_Dl	50_S	50_Ds	50_H	50_Dl	50_S2	50_Ds2	50_H2	50_Dl2	Truck (1)	Truck (2)
m3/day	7.5	14	14	20	35	35	50	50	70	70	120	120	175	175	300	300	350	350	600	600	350	350	600	600	300
m3 / year	2737.5	5110	5110	7300	12775	12775	18250	18250	25550	25550	43800	43800	63875	63875	109500	109500	127750	127750	219000	219000	127750	127750	219000	219000	109500
[Borehole]	4878.61	11931.7	11931.7	11931.7	18328.4	18328.4	18328.4	18328.4	18328.4	18328.4	18328.4	18328.4	22831.8	22831.8	22831.8	22831.8	22831.8	22831.8	22831.8	22831.8	22831.8	22831.8	22831.8	22831.8	22831.8
[Site]	288.675	3740.18	6127.22	6127.22	16265.4	18652.4	18652.4	18652.4	21756.8	24143.8	24143.8	24143.8	36234.8	38621.9	38621.9	38621.9	36234.8	38621.9	38621.9	38621.9	36234.8	38621.9	38621.9	38621.9	38621.9
[Pumping]	1265.84	8481.32	15651.4	15651.4	48769.3	34485.8	59378.2	34485.8	78628.6	45037.8	98022.4	45037.8	130862	66551.7	157571	66551.7	239168	110541	268504	110541	232015	102143	261352	102143	66551.7
[Distribution]	0	24769	24769	27651.7	105619	105619	138400	138400	137892	137892	201355	201355	196592	196592	285627	285627	293270	293270	504369	504369	216958	216958	370729	370729	0
TOT Capex	6433.13	48922.1	58479.3	61362.1	188982	177086	234759	209867	256606	225402	341850	288865	386521	324597	504652	413632	591504	465264	834327	676364	508040	380555	693534	534326	128005
1st year O&M	485.11	4132.17	7686.24	9243.48	4461.41	8004.39	6290.71	9633.69	9036.78	18015.3	16091	24819.5	10433	33029.1	27854.2	50200.3	12083	42265.4	36023	65105.4	12683	42265.4	36023	65105.4	788738
TOT capex + 1st year O&M	6918.24	53054.3	66165.5	70605.5	193444	185090	241050	219500	265643	243417	357941	313685	396954	357626	532506	463833	603587	507530	870350	741469	520723	422821	729557	599431	916743
DISCOUNT RATE	0																											DISCOUNT RATE	0.06
YEARLY COSTS [USD/YEAR]																												YEARLY COSTS [USD/YEAR]
	USD/y	USD/y	USD/y	USD/y	USD/y	USD/y	USD/y	USD/y	USD/y	USD/y	USD/y	USD/y	USD/y	USD/y	USD/y	USD/y	USD/y	USD/y	USD/y	USD/y	USD/y	USD/y	USD/y	USD/y	USD/y				USD/y	USD/y	USD/y	USD/y	USD/y	USD/y	USD/y	USD/y	USD/y	USD/y	USD/y	USD/y	USD/y	USD/y	USD/y	USD/y	USD/y	USD/y	USD/y	USD/y	USD/y
	HP	2_S	2_Ds	2_Dl	5_S	5_Ds	5_H	5_Dl	10_S	10_Ds	10_H	10_Dl	25_S	25_Ds	25_H	25_Dl	50_S	50_Ds	50_H	50_Dl	50_S2	50_Ds2	50_H2	50_Dl2	Truck (1)				HP	2_S	2_Ds	2_Dl	5_S	5_Ds	5_H	5_Dl	10_S	10_Ds	10_H	10_Dl	25_S	25_Ds	25_H	25_Dl	50_S	50_Ds	50_H	50_Dl	50_S2
1	6918.24	53054.3	66165.5	70605.5	193444	185090	241050	219500	265643	243417	357941	313685	396954	357626	532506	463833	603587	507530	870350	741469	520723	422821	729557	599431	916743			1	6918.24	53054.3	66165.5	70605.5	193444	185090	241050	219500	265643	243417	357941	313685	396954	357626	532506	463833	603587	507530	870350	741469	520723
2	1319.11	4132.17	10283.3	11840.6	4461.41	10695	6290.71	12324.3	9036.78	18015.3	16091	30145.6	10433	33029.1	27854.2	57898.1	12083	42265.4	36023	73562	12683	42265.4	36023	73562	796435			2	1244.44	3898.28	9701.26	11170.4	4208.88	10089.6	5934.64	11626.7	8525.26	16995.5	15180.2	28439.2	9842.43	31159.5	26277.6	54620.9	11399	39873	33984	69398.1	11965.1
3	1750.95	4132.17	7686.24	11840.6	4461.41	8004.39	6290.71	12324.3	9036.78	23341.3	16091	24819.5	10433	40726.9	27854.2	50200.3	12083	50721.9	36023	65105.4	12683	50721.9	36023	65105.4	788738			3	1558.34	3677.62	6840.73	10538.1	3970.64	7123.88	5598.71	10968.6	8042.7	20773.7	14321	22089.3	9285.31	36246.8	24790.2	44678.1	10753.8	45142.3	32060.4	57943.6	11287.8
4	1319.11	4132.17	10283.3	9243.48	4461.41	10695	6290.71	9633.69	9036.78	18015.3	16091	30145.6	10433	33029.1	27854.2	57898.1	12083	42265.4	36023	73562	12683	42265.4	36023	73562	796435			4	1107.55	3469.45	8634.08	7761	3745.89	8979.71	5281.8	8088.63	7587.46	15126	13510.3	25310.8	8759.72	27731.9	23387	48612.4	10145.1	35486.8	30245.6	61764.1	10648.9
5	485.11	4132.17	7686.24	19854	4461.41	8004.39	13156.6	21826.3	9036.78	18015.3	26689	29599.4	10433	33029.1	49792.9	63391.5	12083	42265.4	64700	84177.7	12683	42265.4	64700	84177.7	801929			5	384.253	3273.07	6088.22	15726.2	3533.85	6340.23	10421.3	17288.5	7157.98	14269.8	21140.2	23445.5	8263.89	26162.1	39440.6	50212	9570.85	33478.1	51248.4	66676.6	10046.1
6	2584.95	4132.17	16343.2	11840.6	4461.41	16973	6290.71	12324.3	9036.78	23341.3	16091	42573	10433	40726.9	27854.2	75859.6	12083	50721.9	36023	93293.9	12683	50721.9	36023	93293.9	814397			6	1931.63	3087.8	12212.6	8847.96	3333.83	12683.2	4700.79	9209.42	6752.81	17442	12024.1	31813	7796.12	30433.5	20814.3	56686.7	9029.1	37902.4	26918.5	69714.6	9477.45
7	485.11	7585.72	9639.79	11840.6	10950.7	11228.4	9556.02	12324.3	12458.6	18015.3	19512.8	28241.3	16532.5	33029.1	33953.8	50200.3	36357.9	42265.4	60298	65105.4	36957.9	42265.4	36023	65105.4	788738			7	341.983	5347.63	6795.67	8347.14	7719.81	7915.55	6736.62	8688.13	8782.8	12700	13755.8	19909	11654.8	23284.2	23936.1	35389.3	25630.9	29795.4	42507.7	45896.8	26053.9
8	1319.11	4132.17	10283.3	9243.48	4461.41	10695	6290.71	9633.69	13816.7	22795.1	16091	30145.6	23624.1	46220.2	27854.2	57898.1	31155.2	61337.6	36023	73562	31755.2	61337.6	36023	73562	796435			8	877.283	2748.13	6839	6147.44	2967.09	7112.77	4183.68	6406.96	9188.86	15160.1	10701.4	20048.5	15711.4	30739.1	18524.7	38505.6	20720	40793	23957.4	48922.9	21119
9	1750.95	4132.17	7686.24	17900.5	4461.41	8004.39	6290.71	18602.3	9036.78	23341.3	21417.1	24819.5	10433	40726.9	35552	50200.3	12083	50721.9	44479.6	65105.4	12683	50721.9	44479.6	65105.4	788738			9	1098.57	2592.58	4822.44	11231	2799.14	5022.05	3946.87	11671.3	5669.79	14644.6	13437.3	15572.1	6545.78	25552.5	22305.8	31496.3	7581.01	31823.6	27907	40848	7957.45
10	1319.11	4132.17	10283.3	13794.1	4461.41	10695	13156.6	15548.3	9036.78	35768.8	21363	34925.4	10433	58688.4	42095.1	71089.3	12083	70453.9	56243.4	92634.2	12683	70453.9	56243.4	92634.2	809626			10	780.779	2445.83	6086.69	8164.72	2640.7	6330.34	7787.37	9202.99	5348.86	21171.5	12644.7	20672.3	6175.26	34737.6	24916	42077.6	7151.89	41701.5	33290.4	54830.1	7507.03
YEARLY WATER PRODUCTION [m3/year]																												YEARLY WATER PRODUCTION [m3/year]
	m3/y	m3/y	m3/y	m3/y	m3/y	m3/y	m3/y	m3/y	m3/y	m3/y	m3/y	m3/y	m3/y	m3/y	m3/y	m3/y	m3/y	m3/y	m3/y	m3/y	m3/y	m3/y	m3/y	m3/y	m3/y				m3/y	m3/y	m3/y	m3/y	m3/y	m3/y	m3/y	m3/y	m3/y	m3/y	m3/y	m3/y	m3/y	m3/y	m3/y	m3/y	m3/y	m3/y	m3/y	m3/y	m3/y
	HP	2_S	2_Ds	2_Dl	5_S	5_Ds	5_H	5_Dl	10_S	10_Ds	10_H	10_Dl	25_S	25_Ds	25_H	25_Dl	50_S	50_Ds	50_H	50_Dl	50_S2	50_Ds2	50_H2	50_Dl2	Truck (1)				HP	2_S	2_Ds	2_Dl	5_S	5_Ds	5_H	5_Dl	10_S	10_Ds	10_H	10_Dl	25_S	25_Ds	25_H	25_Dl	50_S	50_Ds	50_H	50_Dl	50_S2
1	2737.5	5110	5110	7300	12775	12775	18250	18250	25550	25550	43800	43800	63875	63875	109500	109500	127750	127750	219000	219000	127750	127750	219000	219000	109500			1	2737.5	5110	5110	7300	12775	12775	18250	18250	25550	25550	43800	43800	63875	63875	109500	109500	127750	127750	219000	219000	127750
2	2737.5	5110	5110	7300	12775	12775	18250	18250	25550	25550	43800	43800	63875	63875	109500	109500	127750	127750	219000	219000	127750	127750	219000	219000	109500			2	2582.55	4820.75	4820.75	6886.79	12051.9	12051.9	17217	17217	24103.8	24103.8	41320.8	41320.8	60259.4	60259.4	103302	103302	120519	120519	206604	206604	120519
3	2737.5	5110	5110	7300	12775	12775	18250	18250	25550	25550	43800	43800	63875	63875	109500	109500	127750	127750	219000	219000	127750	127750	219000	219000	109500			3	2436.37	4547.88	4547.88	6496.97	11369.7	11369.7	16242.4	16242.4	22739.4	22739.4	38981.8	38981.8	56848.5	56848.5	97454.6	97454.6	113697	113697	194909	194909	113697
4	2737.5	5110	5110	7300	12775	12775	18250	18250	25550	25550	43800	43800	63875	63875	109500	109500	127750	127750	219000	219000	127750	127750	219000	219000	109500			4	2298.46	4290.45	4290.45	6129.22	10726.1	10726.1	15323.1	15323.1	21452.3	21452.3	36775.3	36775.3	53630.7	53630.7	91938.3	91938.3	107261	107261	183877	183877	107261
5	2737.5	5110	5110	7300	12775	12775	18250	18250	25550	25550	43800	43800	63875	63875	109500	109500	127750	127750	219000	219000	127750	127750	219000	219000	109500			5	2168.36	4047.6	4047.6	5782.28	10119	10119	14455.7	14455.7	20238	20238	34693.7	34693.7	50595	50595	86734.3	86734.3	101190	101190	173469	173469	101190
6	2737.5	5110	5110	7300	12775	12775	18250	18250	25550	25550	43800	43800	63875	63875	109500	109500	127750	127750	219000	219000	127750	127750	219000	219000	109500			6	2045.62	3818.49	3818.49	5454.98	9546.22	9546.22	13637.5	13637.5	19092.4	19092.4	32729.9	32729.9	47731.1	47731.1	81824.8	81824.8	95462.2	95462.2	163650	163650	95462.2
7	2737.5	5110	5110	7300	12775	12775	18250	18250	25550	25550	43800	43800	63875	63875	109500	109500	127750	127750	219000	219000	127750	127750	219000	219000	109500			7	1929.83	3602.35	3602.35	5146.21	9005.87	9005.87	12865.5	12865.5	18011.7	18011.7	30877.3	30877.3	45029.4	45029.4	77193.2	77193.2	90058.7	90058.7	154386	154386	90058.7
8	2737.5	5110	5110	7300	12775	12775	18250	18250	25550	25550	43800	43800	63875	63875	109500	109500	127750	127750	219000	219000	127750	127750	219000	219000	109500			8	1820.59	3398.44	3398.44	4854.92	8496.1	8496.1	12137.3	12137.3	16992.2	16992.2	29129.5	29129.5	42480.5	42480.5	72823.8	72823.8	84961	84961	145648	145648	84961
9	2737.5	5110	5110	7300	12775	12775	18250	18250	25550	25550	43800	43800	63875	63875	109500	109500	127750	127750	219000	219000	127750	127750	219000	219000	109500			9	1717.54	3206.08	3206.08	4580.11	8015.19	8015.19	11450.3	11450.3	16030.4	16030.4	27480.7	27480.7	40076	40076	68701.7	68701.7	80151.9	80151.9	137403	137403	80151.9
10	2737.5	5110	5110	7300	12775	12775	18250	18250	25550	25550	43800	43800	63875	63875	109500	109500	127750	127750	219000	219000	127750	127750	219000	219000	109500			10	1620.32	3024.6	3024.6	4320.86	7561.5	7561.5	10802.1	10802.1	15123	15123	25925.2	25925.2	37807.5	37807.5	64812.9	64812.9	75615	75615	129626	129626	75615
CUMULATIVE WATER PRODUCTION [m3]																												CUMULATIVE WATER PRODUCTION [m3]
	m3	m3	m3	m3	m3	m3	m3	m3	m3	m3	m3	m3	m3	m3	m3	m3	m3	m3	m3	m3	m3	m3	m3	m3	m3				m3	m3	m3	m3	m3	m3	m3	m3	m3	m3	m3	m3	m3	m3	m3	m3	m3	m3	m3	m3	m3
	HP	2_S	2_Ds	2_Dl	5_S	5_Ds	5_H	5_Dl	10_S	10_Ds	10_H	10_Dl	25_S	25_Ds	25_H	25_Dl	50_S	50_Ds	50_H	50_Dl	50_S2	50_Ds2	50_H2	50_Dl2	Truck (1)				HP	2_S	2_Ds	2_Dl	5_S	5_Ds	5_H	5_Dl	10_S	10_Ds	10_H	10_Dl	25_S	25_Ds	25_H	25_Dl	50_S	50_Ds	50_H	50_Dl	50_S2
1	2737.5	5110	5110	7300	12775	12775	18250	18250	25550	25550	43800	43800	63875	63875	109500	109500	127750	127750	219000	219000	127750	127750	219000	219000	109500			1	2737.5	5110	5110	7300	12775	12775	18250	18250	25550	25550	43800	43800	63875	63875	109500	109500	127750	127750	219000	219000	127750
2	5475	10220	10220	14600	25550	25550	36500	36500	51100	51100	87600	87600	127750	127750	219000	219000	255500	255500	438000	438000	255500	255500	438000	438000	219000			2	5320.05	9930.75	9930.75	14186.8	24826.9	24826.9	35467	35467	49653.8	49653.8	85120.8	85120.8	124134	124134	212802	212802	248269	248269	425604	425604	248269
3	8212.5	15330	15330	21900	38325	38325	54750	54750	76650	76650	131400	131400	191625	191625	328500	328500	383250	383250	657000	657000	383250	383250	657000	657000	328500			3	7756.41	14478.6	14478.6	20683.8	36196.6	36196.6	51709.4	51709.4	72393.2	72393.2	124103	124103	180983	180983	310256	310256	361966	361966	620513	620513	361966
4	10950	20440	20440	29200	51100	51100	73000	73000	102200	102200	175200	175200	255500	255500	438000	438000	511000	511000	876000	876000	511000	511000	876000	876000	438000			4	10054.9	18769.1	18769.1	26813	46922.7	46922.7	67032.5	67032.5	93845.5	93845.5	160878	160878	234614	234614	402195	402195	469227	469227	804390	804390	469227
5	13687.5	25550	25550	36500	63875	63875	91250	91250	127750	127750	219000	219000	319375	319375	547500	547500	638750	638750	1095000	1095000	638750	638750	1095000	1095000	547500			5	12223.2	22816.7	22816.7	32595.3	57041.7	57041.7	81488.2	81488.2	114083	114083	195572	195572	285209	285209	488929	488929	570417	570417	977858	977858	570417
6	16425	30660	30660	43800	76650	76650	109500	109500	153300	153300	262800	262800	383250	383250	657000	657000	766500	766500	1314000	1314000	766500	766500	1314000	1314000	657000			6	14268.8	26635.2	26635.2	38050.3	66587.9	66587.9	95125.6	95125.6	133176	133176	228302	228302	332940	332940	570754	570754	665879	665879	1.14151e+06	1.14151e+06	665879
7	19162.5	35770	35770	51100	89425	89425	127750	127750	178850	178850	306600	306600	447125	447125	766500	766500	894250	894250	1533000	1533000	894250	894250	1533000	1533000	766500			7	16198.7	30237.5	30237.5	43196.5	75593.8	75593.8	107991	107991	151188	151188	259179	259179	377969	377969	647947	647947	755938	755938	1.29589e+06	1.29589e+06	755938
8	21900	40880	40880	58400	102200	102200	146000	146000	204400	204400	350400	350400	511000	511000	876000	876000	1022000	1022000	1752000	1752000	1022000	1022000	1752000	1752000	876000			8	18019.3	33636	33636	48051.4	84089.9	84089.9	120128	120128	168180	168180	288308	288308	420450	420450	720771	720771	840899	840899	1.44154e+06	1.44154e+06	840899
9	24637.5	45990	45990	65700	114975	114975	164250	164250	229950	229950	394200	394200	574875	574875	985500	985500	1149750	1149750	1971000	1971000	1149750	1149750	1971000	1971000	985500			9	19736.8	36842	36842	52631.5	92105.1	92105.1	131579	131579	184210	184210	315789	315789	460526	460526	789472	789472	921051	921051	1.57894e+06	1.57894e+06	921051
10	27375	51100	51100	73000	127750	127750	182500	182500	255500	255500	438000	438000	638750	638750	1095000	1095000	1277500	1277500	2190000	2190000	1277500	1277500	2190000	2190000	1095000			10	21357.1	39866.6	39866.6	56952.4	99666.6	99666.6	142381	142381	199333	199333	341714	341714	498333	498333	854285	854285	996666	996666	1.70857e+06	1.70857e+06	996666
CUMULATIVE COSTS [USD]																												NPV - DISCOUNT RATE = 7.5%
	USD	USD	USD	USD	USD	USD	USD	USD	USD	USD	USD	USD	USD	USD	USD	USD	USD	USD	USD	USD	USD	USD	USD	USD	USD				USD	USD	USD	USD	USD	USD	USD	USD	USD	USD	USD	USD	USD	USD	USD	USD	USD	USD	USD	USD	USD
	HP	2_S	2_Ds	2_Dl	5_S	5_Ds	5_H	5_Dl	10_S	10_Ds	10_H	10_Dl	25_S	25_Ds	25_H	25_Dl	50_S	50_Ds	50_H	50_Dl	50_S2	50_Ds2	50_H2	50_Dl2	Truck (1)				HP	2_S	2_Ds	2_Dl	5_S	5_Ds	5_H	5_Dl	10_S	10_Ds	10_H	10_Dl	25_S	25_Ds	25_H	25_Dl	50_S	50_Ds	50_H	50_Dl	50_S2
1	6918.24	53054.3	66165.5	70605.5	193444	185090	241050	219500	265643	243417	357941	313685	396954	357626	532506	463833	603587	507530	870350	741469	520723	422821	729557	599431	916743			1	6918.24	53054.3	66165.5	70605.5	193444	185090	241050	219500	265643	243417	357941	313685	396954	357626	532506	463833	603587	507530	870350	741469	520723
2	8237.35	57186.5	76448.9	82446.1	197905	195785	247340	231825	274679	261433	374032	343830	407387	390655	560361	521731	615670	549795	906373	815031	533406	465086	765580	672993	1.71318e+06			2	8162.68	56952.6	75866.8	81775.9	197652	195180	246984	231127	274168	260413	373121	342124	406796	388786	558784	518454	614986	547403	904334	810868	532688
3	9988.3	61318.6	84135.1	94286.7	202366	203789	253631	244149	283716	284774	390123	368650	417820	431382	588215	571931	627753	600517	942396	880137	546089	515808	801603	738099	2.50192e+06			3	9721.02	60630.2	82707.5	92314	201623	202304	252583	242095	282211	281187	387442	364213	416082	425033	583574	563132	625740	592545	936395	868811	543976
4	11307.4	65450.8	94418.4	103530	206828	214484	259922	253782	292753	302789	406214	398796	428253	464411	616069	629829	639836	642782	978419	953699	558772	558074	837626	811661	3.29835e+06			4	10828.6	64099.7	91341.6	100075	205369	211283	257865	250184	289798	296312	400952	389524	424841	452765	606961	611744	635885	628032	966640	930575	554625
5	11792.5	69583	102105	123384	211289	222489	273078	275609	301790	320804	432903	428395	438686	497441	665862	693221	651919	685048	1.04312e+06	1.03788e+06	571455	600339	902326	895838	4.10028e+06			5	11212.8	67372.7	97429.8	115801	208903	217623	268286	267473	296956	310582	422093	412970	433105	478927	646402	661956	645456	661510	1.01789e+06	997252	564671
6	14377.5	73715.2	118448	135225	215751	239462	279369	287933	310827	344146	448994	470968	449119	538167	693716	769080	664002	735770	1.07914e+06	1.13117e+06	584138	651061	938349	989132	4.91468e+06			6	13144.4	70460.5	109642	124649	212237	230307	272987	276682	303709	328024	434117	444783	440901	509360	667216	718643	654485	699412	1.04481e+06	1.06697e+06	574148
7	14862.6	81300.9	128088	147065	226701	250690	288925	300257	323285	362161	468507	499209	465651	571196	727670	819281	700360	778035	1.13944e+06	1.19628e+06	621096	693326	974372	1.05424e+06	5.70341e+06			7	13486.4	75808.2	116438	132996	219956	238222	279723	285370	312492	340724	447873	464692	452556	532644	691152	754032	680116	729208	1.08731e+06	1.11286e+06	600202
8	16181.7	85433.1	138371	156309	231163	261385	295216	309891	337102	384956	484598	529355	489275	617417	755524	877179	731515	839373	1.17546e+06	1.26984e+06	652851	754664	1.0104e+06	1.1278e+06	6.49985e+06			8	14363.7	78556.3	123277	139144	222924	245335	283907	291777	321680	355884	458574	484740	468268	563383	709677	792538	700836	770001	1.11127e+06	1.16179e+06	621321
9	17932.6	89565.2	146057	174209	235624	269389	301507	328493	346139	408297	506015	554174	499708	658144	791076	927379	743598	890095	1.21994e+06	1.33494e+06	665534	805386	1.05487e+06	1.19291e+06	7.28859e+06			9	15462.3	81148.9	128100	150375	225723	250357	287854	303448	327350	370529	472011	500312	474813	588936	731982	824034	708417	801825	1.13918e+06	1.20263e+06	629279
10	19251.7	93697.4	156341	188003	240086	280084	314663	344042	355175	444066	527378	589100	510141	716832	833171	998469	755681	960549	1.27619e+06	1.42758e+06	678217	875840	1.11112e+06	1.28554e+06	8.09821e+06			10	16243.1	83594.7	134186	158539	228363	256687	295641	312651	332699	391700	484656	520985	480989	623674	756899	866112	715569	843526	1.17247e+06	1.25746e+06	636786
CUMULATIVE COSTS PER M3 OF WATER [USD/m3]																												LWC - DISCOUNT RATE = 7.5%
	USD/m3	USD/m3	USD/m3	USD/m3	USD/m3	USD/m3	USD/m3	USD/m3	USD/m3	USD/m3	USD/m3	USD/m3	USD/m3	USD/m3	USD/m3	USD/m3	USD/m3	USD/m3	USD/m3	USD/m3	USD/m3	USD/m3	USD/m3	USD/m3	USD/m3	USD/m3			USD/m3	USD/m3	USD/m3	USD/m3	USD/m3	USD/m3	USD/m3	USD/m3	USD/m3	USD/m3	USD/m3	USD/m3	USD/m3	USD/m3	USD/m3	USD/m3	USD/m3	USD/m3	USD/m3	USD/m3	USD/m3
	HP	2_S	2_Ds	2_Dl	5_S	5_Ds	5_H	5_Dl	10_S	10_Ds	10_H	10_Dl	25_S	25_Ds	25_H	25_Dl	50_S	50_Ds	50_H	50_Dl	50_S2	50_Ds2	50_H2	50_Dl2	Truck (1)	Truck (2)			HP	2_S	2_Ds	2_Dl	5_S	5_Ds	5_H	5_Dl	10_S	10_Ds	10_H	10_Dl	25_S	25_Ds	25_H	25_Dl	50_S	50_Ds	50_H	50_Dl	50_S2
1	2.52721	10.3824	12.9482	9.67199	15.1424	14.4885	13.2082	12.0274	10.397	9.5271	8.17217	7.16176	6.21454	5.59885	4.86307	4.23592	4.72475	3.97284	3.9742	3.38571	4.07611	3.30975	3.33131	2.73713	8.37208	6.74463		1	2.52721	10.3824	12.9482	9.67199	15.1424	14.4885	13.2082	12.0274	10.397	9.5271	8.17217	7.16176	6.21454	5.59885	4.86307	4.23592	4.72475	3.97284	3.9742	3.38571	4.07611
2	1.50454	5.59555	7.48032	5.64699	7.74579	7.66282	6.77645	6.35136	5.37533	5.1161	4.26977	3.92501	3.18894	3.05797	2.55872	2.38233	2.40967	2.15184	2.06935	1.8608	2.08769	1.8203	1.7479	1.53651	7.82273	6.74463		2	1.53432	5.73497	7.63958	5.76423	7.96123	7.86162	6.96378	6.51668	5.52159	5.24457	4.38343	4.01928	3.27706	3.13197	2.62584	2.43632	2.4771	2.20488	2.12483	1.90522	2.14561
3	1.21623	3.99991	5.48827	4.30533	5.28027	5.3174	4.63253	4.45934	3.70145	3.71525	2.96897	2.80556	2.1804	2.25118	1.79061	1.74104	1.63797	1.56691	1.43439	1.33963	1.42489	1.34588	1.2201	1.12344	7.61618	6.74463		3	1.25329	4.18756	5.71238	4.46311	5.57022	5.58902	4.88466	4.68184	3.8983	3.88416	3.12195	2.93478	2.29901	2.34847	1.88094	1.81505	1.72873	1.63702	1.50907	1.40015	1.50284
4	1.03264	3.20209	4.6193	3.54555	4.04751	4.19735	3.56057	3.47647	2.86451	2.96271	2.31857	2.27623	1.67614	1.81766	1.40655	1.43797	1.25213	1.25789	1.11692	1.0887	1.09349	1.09212	0.956194	0.926553	7.53048	6.74463		4	1.07695	3.41517	4.8666	3.73233	4.37675	4.50279	3.84686	3.73228	3.08803	3.15745	2.49228	2.42124	1.81081	1.92983	1.50912	1.52101	1.35517	1.33844	1.20171	1.15687	1.182
5	0.861554	2.7234	3.99627	3.38039	3.30785	3.48319	2.99264	3.02037	2.36235	2.51119	1.97673	1.95614	1.37358	1.55754	1.21619	1.26616	1.02062	1.07248	0.95262	0.947832	0.894646	0.939865	0.824042	0.818117	7.4891	6.74463		5	0.917337	2.95278	4.27011	3.5527	3.66228	3.81516	3.29233	3.28235	2.60297	2.72241	2.15825	2.1116	1.51856	1.67922	1.32208	1.35389	1.13155	1.1597	1.04094	1.01983	0.989926
6	0.875341	2.40428	3.86327	3.08732	2.81475	3.12409	2.55132	2.62953	2.02757	2.24492	1.7085	1.79212	1.17187	1.40422	1.05588	1.17059	0.866278	0.959908	0.821265	0.86086	0.762085	0.849395	0.714117	0.752764	7.48048	6.74463		6	0.921199	2.64539	4.11645	3.27591	3.18731	3.45868	2.86975	2.9086	2.28051	2.46309	1.90151	1.94822	1.32427	1.52989	1.16901	1.25911	0.982888	1.05036	0.915287	0.934699	0.862241
7	0.775607	2.27288	3.58087	2.87799	2.5351	2.80336	2.26164	2.35035	1.80758	2.02494	1.52807	1.62821	1.04143	1.27749	0.949341	1.06886	0.783181	0.870042	0.743275	0.78035	0.694544	0.775316	0.635598	0.687696	7.44085	6.74463		7	0.832564	2.50709	3.85078	3.07887	2.90972	3.15135	2.59024	2.64253	2.06691	2.25365	1.72804	1.79294	1.19734	1.40923	1.06668	1.16373	0.899698	0.96464	0.839046	0.858761	0.793983
8	0.73889	2.08985	3.38481	2.67652	2.26187	2.55758	2.02203	2.12254	1.64923	1.88335	1.38298	1.51072	0.957486	1.20825	0.862471	1.00135	0.715768	0.821304	0.670927	0.724793	0.638798	0.738419	0.57671	0.643721	7.41992	6.74463		8	0.797131	2.33548	3.66504	2.89573	2.65101	2.91753	2.36336	2.42888	1.91272	2.11609	1.59057	1.68133	1.11373	1.33995	0.984608	1.09957	0.833436	0.915688	0.770892	0.805933	0.738877
9	0.72786	1.94749	3.17585	2.65159	2.04935	2.34303	1.83566	1.99996	1.50528	1.77559	1.28365	1.40582	0.869247	1.14485	0.802716	0.941024	0.646748	0.774164	0.618946	0.677292	0.578851	0.700488	0.535198	0.605228	7.39583	6.74463		9	0.783424	2.20262	3.47699	2.85712	2.45071	2.71817	2.18769	2.30621	1.77705	2.01145	1.49471	1.58432	1.03102	1.27883	0.927179	1.04378	0.76914	0.870554	0.721481	0.761669	0.683218
10	0.70326	1.83361	3.0595	2.57539	1.87934	2.19244	1.72418	1.88516	1.39012	1.73803	1.20406	1.34498	0.798656	1.12224	0.760887	0.911843	0.591531	0.751897	0.582734	0.651862	0.530894	0.685589	0.50736	0.587004	7.39563	6.74463		10	0.760545	2.09686	3.36588	2.78372	2.29127	2.57546	2.07641	2.19588	1.66906	1.96505	1.41831	1.52462	0.965195	1.25152	0.886002	1.01384	0.717962	0.846348	0.686228	0.735974	0.638916
[truncated: 32 more columns]

## Sheet: Costs_UGX
	HP	2_S	2_Ds	2_Dl	5_S	5_Ds	5_H	5_Dl	10_S	10_Ds	10_H	10_Dl	25_S	25_Ds	25_H	25_Dl	50_S	50_Ds	50_H	50_Dl	50_S2	50_Ds2	50_H2	50_Dl2	Truck (1)	Truck (2)		UGX to USD
m3/day	7.5	14	14	20	35	35	50	50	70	70	120	120	175	175	300	300	350	350	600	600	350	350	600	600	300			0.000278
m3 / year	2737.5	5110	5110	7300	12775	12775	18250	18250	25550	25550	43800	43800	63875	63875	109500	109500	127750	127750	219000	219000	127750	127750	219000	219000	109500
Borehole drilling	17548960	42919668	42919668	42919668	65929668	65929668	65929668	65929668	65929668	65929668	65929668	65929668	82128708	82128708	82128708	82128708	82128708	82128708	82128708	82128708	82128708	82128708	82128708	82128708	82128708
Site	1.0384e+06	1.34539e+07	2.20404e+07	2.20404e+07	5.85086e+07	6.70951e+07	6.70951e+07	6.70951e+07	7.82618e+07	8.68483e+07	8.68483e+07	8.68483e+07	1.30341e+08	1.38928e+08	1.38928e+08	1.38928e+08	1.30341e+08	1.38928e+08	1.38928e+08	1.38928e+08	1.30341e+08	1.38928e+08	1.38928e+08	1.38928e+08	1.38928e+08
Pumping	4553384	3.05083e+07	5.63001e+07	5.63001e+07	175429302	124049506	213590502	124049506	282836796	162006448	352598396	162006448	470727960	2.39395e+08	566803560	2.39395e+08	8.60315e+08	3.97629e+08	9.65843e+08	3.97629e+08	834586860	367422500	940114260	367422500	2.39395e+08
Distribution	0	8.9097e+07	8.9097e+07	9.94667e+07	3.79924e+08	3.79924e+08	4.97841e+08	4.97841e+08	4.96014e+08	4.96014e+08	7.243e+08	7.243e+08	7.07165e+08	7.07165e+08	1.02744e+09	1.02744e+09	1.05493e+09	1.05493e+09	1.81428e+09	1.81428e+09	7.80426e+08	7.80426e+08	1.33356e+09	1.33356e+09	0
TOT Capex	23140744	1.75979e+08	2.10357e+08	2.20727e+08	6.79792e+08	6.36999e+08	8.44457e+08	7.54916e+08	9.23043e+08	8.10799e+08	1.22968e+09	1.03908e+09	1.39036e+09	1.16762e+09	1.8153e+09	1.48789e+09	2.12771e+09	1.67361e+09	3.00118e+09	2.43296e+09	1.82748e+09	1.3689e+09	2.49473e+09	1.92204e+09	4.60451e+08
1st year O&M	1745000	1.48639e+07	2.76483e+07	3.32499e+07	1.60482e+07	2.87928e+07	2.26285e+07	3.46536e+07	3.25064e+07	6.48031e+07	5.78814e+07	8.92788e+07	3.75287e+07	1.1881e+08	1.00195e+08	1.80577e+08	4.34639e+07	1.52034e+08	1.29579e+08	2.34192e+08	4.56222e+07	1.52034e+08	1.29579e+08	2.34192e+08	2.83719e+09
	24885744	1.90843e+08	2.38006e+08	2.53977e+08	6.9584e+08	6.65791e+08	8.67085e+08	7.89569e+08	9.55549e+08	8.75602e+08	1.28756e+09	1.12836e+09	1.42789e+09	1.28643e+09	1.91549e+09	1.66846e+09	2.17118e+09	1.82565e+09	3.13076e+09	2.66716e+09	1.8731e+09	1.52094e+09	2.62431e+09	2.15623e+09	3.29764e+09
DISCOUNT RATE	0																											DISCOUNT RATE	0.06
YEARLY COSTS [USD/YEAR]																												YEARLY COSTS [USD/YEAR]
	UGX/y	UGX/y	UGX/y	UGX/y	UGX/y	UGX/y	UGX/y	UGX/y	UGX/y	UGX/y	UGX/y	UGX/y	UGX/y	UGX/y	UGX/y	UGX/y	UGX/y	UGX/y	UGX/y	UGX/y	UGX/y	UGX/y	UGX/y	UGX/y	UGX/y				UGX/y	UGX/y	UGX/y	UGX/y	UGX/y	UGX/y	UGX/y	UGX/y	UGX/y	UGX/y	UGX/y	UGX/y	UGX/y	UGX/y	UGX/y	UGX/y	UGX/y	UGX/y	UGX/y	UGX/y	UGX/y
	HP	2_S	2_Ds	2_Dl	5_S	5_Ds	5_H	5_Dl	10_S	10_Ds	10_H	10_Dl	25_S	25_Ds	25_H	25_Dl	50_S	50_Ds	50_H	50_Dl	50_S2	50_Ds2	50_H2	50_Dl2	Truck (1)				HP	2_S	2_Ds	2_Dl	5_S	5_Ds	5_H	5_Dl	10_S	10_Ds	10_H	10_Dl	25_S	25_Ds	25_H	25_Dl	50_S	50_Ds	50_H	50_Dl	50_S2
1	24885744	1.90843e+08	2.38006e+08	2.53977e+08	6.9584e+08	6.65791e+08	8.67085e+08	7.89569e+08	9.55549e+08	8.75602e+08	1.28756e+09	1.12836e+09	1.42789e+09	1.28643e+09	1.91549e+09	1.66846e+09	2.17118e+09	1.82565e+09	3.13076e+09	2.66716e+09	1.8731e+09	1.52094e+09	2.62431e+09	2.15623e+09	3.29764e+09			1	24885744	1.90843e+08	2.38006e+08	2.53977e+08	6.9584e+08	6.65791e+08	8.67085e+08	7.89569e+08	9.55549e+08	8.75602e+08	1.28756e+09	1.12836e+09	1.42789e+09	1.28643e+09	1.91549e+09	1.66846e+09	2.17118e+09	1.82565e+09	3.13076e+09	2.66716e+09	1.8731e+09
2	4745000	1.48639e+07	3.69904e+07	4.2592e+07	1.60482e+07	3.84711e+07	2.26285e+07	4.43319e+07	3.25064e+07	6.48031e+07	5.78814e+07	1.08437e+08	3.75287e+07	1.1881e+08	1.00195e+08	2.08267e+08	4.34639e+07	1.52034e+08	1.29579e+08	2.64611e+08	4.56222e+07	1.52034e+08	1.29579e+08	2.64611e+08	2.86488e+09			2	4.47642e+06	1.40226e+07	3.48966e+07	4.01811e+07	1.51398e+07	3.62935e+07	2.13476e+07	4.18226e+07	3.06664e+07	6.1135e+07	5.46051e+07	1.02299e+08	3.54044e+07	1.12085e+08	9.45237e+07	1.96478e+08	4.10037e+07	1.43428e+08	1.22245e+08	2.49633e+08	4.30398e+07
3	6.29838e+06	1.48639e+07	2.76483e+07	4.2592e+07	1.60482e+07	2.87928e+07	2.26285e+07	4.43319e+07	3.25064e+07	8.39616e+07	5.78814e+07	8.92788e+07	3.75287e+07	1.465e+08	1.00195e+08	1.80577e+08	4.34639e+07	1.82453e+08	1.29579e+08	2.34192e+08	4.56222e+07	1.82453e+08	1.29579e+08	2.34192e+08	2.83719e+09			3	5.60554e+06	1.32288e+07	2.46069e+07	3.79067e+07	1.42829e+07	2.56255e+07	2.01393e+07	3.94553e+07	2.89306e+07	7.47255e+07	5.15142e+07	7.94578e+07	3.34004e+07	1.30384e+08	8.91733e+07	1.60713e+08	3.86827e+07	1.62383e+08	1.15325e+08	2.0843e+08	4.06036e+07
4	4745000	1.48639e+07	3.69904e+07	3.32499e+07	1.60482e+07	3.84711e+07	2.26285e+07	3.46536e+07	3.25064e+07	6.48031e+07	5.78814e+07	1.08437e+08	3.75287e+07	1.1881e+08	1.00195e+08	2.08267e+08	4.34639e+07	1.52034e+08	1.29579e+08	2.64611e+08	4.56222e+07	1.52034e+08	1.29579e+08	2.64611e+08	2.86488e+09			4	3.98399e+06	1.248e+07	3.10579e+07	2.79173e+07	1.34744e+07	3.23011e+07	1.89993e+07	2.90958e+07	2.7293e+07	5.44099e+07	4.85983e+07	9.1046e+07	3.15098e+07	9.97549e+07	8.41257e+07	1.74865e+08	3.64932e+07	1.2765e+08	1.08797e+08	2.22173e+08	3.83053e+07
5	1745000	1.48639e+07	2.76483e+07	7.14173e+07	1.60482e+07	2.87928e+07	4.73259e+07	7.85118e+07	3.25064e+07	6.48031e+07	9.60036e+07	1.06473e+08	3.75287e+07	1.1881e+08	1.79111e+08	2.28027e+08	4.34639e+07	1.52034e+08	2.32734e+08	3.02797e+08	4.56222e+07	1.52034e+08	2.32734e+08	3.02797e+08	2.88464e+09			5	1.3822e+06	1.17736e+07	2.19001e+07	5.65692e+07	1.27117e+07	2.28066e+07	3.74865e+07	6.21887e+07	2.57481e+07	5.13301e+07	7.60439e+07	8.43362e+07	2.97262e+07	9.41084e+07	1.41873e+08	1.80619e+08	3.44275e+07	1.20425e+08	1.84347e+08	2.39844e+08	3.61371e+07
6	9.29838e+06	1.48639e+07	5.87885e+07	4.2592e+07	1.60482e+07	6.1054e+07	2.26285e+07	4.43319e+07	3.25064e+07	8.39616e+07	5.78814e+07	1.5314e+08	3.75287e+07	1.465e+08	1.00195e+08	2.72876e+08	4.34639e+07	1.82453e+08	1.29579e+08	3.3559e+08	4.56222e+07	1.82453e+08	1.29579e+08	3.3559e+08	2.92948e+09			6	6.94829e+06	1.11072e+07	4.39302e+07	3.18272e+07	1.19922e+07	4.56231e+07	1.69093e+07	3.31274e+07	2.42907e+07	6.2741e+07	4.32523e+07	1.14435e+08	2.80436e+07	1.09473e+08	7.48716e+07	2.03909e+08	3.24788e+07	1.36339e+08	9.68291e+07	2.50772e+08	3.40916e+07
7	1745000	2.72868e+07	3.46755e+07	4.2592e+07	3.9391e+07	4.03898e+07	3.43742e+07	4.43319e+07	4.4815e+07	6.48031e+07	7.01899e+07	1.01587e+08	5.94696e+07	1.1881e+08	1.22136e+08	1.80577e+08	1.30784e+08	1.52034e+08	2.16899e+08	2.34192e+08	1.32942e+08	1.52034e+08	1.29579e+08	2.34192e+08	2.83719e+09			7	1.23016e+06	1.92361e+07	2.44449e+07	3.00257e+07	2.77691e+07	2.84732e+07	2.42324e+07	3.12523e+07	3.15928e+07	4.56836e+07	4.94811e+07	7.16151e+07	4.19237e+07	8.37561e+07	8.61011e+07	1.273e+08	9.21975e+07	1.07178e+08	1.52905e+08	1.65096e+08	9.3719e+07
8	4745000	1.48639e+07	3.69904e+07	3.32499e+07	1.60482e+07	3.84711e+07	2.26285e+07	3.46536e+07	4.97002e+07	8.19969e+07	5.78814e+07	1.08437e+08	8.49788e+07	1.6626e+08	1.00195e+08	2.08267e+08	1.12069e+08	2.20639e+08	1.29579e+08	2.64611e+08	1.14227e+08	2.20639e+08	1.29579e+08	2.64611e+08	2.86488e+09			8	3.1557e+06	9.88536e+06	2.46007e+07	2.21131e+07	1.0673e+07	2.55855e+07	1.50492e+07	2.30466e+07	3.30535e+07	5.45326e+07	3.84944e+07	7.2117e+07	5.65158e+07	1.10572e+08	6.66355e+07	1.38509e+08	7.45324e+07	1.46738e+08	8.61776e+07	1.75982e+08	7.59677e+07
9	6.29838e+06	1.48639e+07	2.76483e+07	6.43901e+07	1.60482e+07	2.87928e+07	2.26285e+07	6.69148e+07	3.25064e+07	8.39616e+07	7.70398e+07	8.92788e+07	3.75287e+07	1.465e+08	1.27885e+08	1.80577e+08	4.34639e+07	1.82453e+08	1.59998e+08	2.34192e+08	4.56222e+07	1.82453e+08	1.59998e+08	2.34192e+08	2.83719e+09			9	3.95168e+06	9.32581e+06	1.73469e+07	4.03992e+07	1.00689e+07	1.80649e+07	1.41974e+07	4.19832e+07	2.03949e+07	5.26785e+07	4.83358e+07	5.60146e+07	2.3546e+07	9.19156e+07	8.02366e+07	1.13296e+08	2.72698e+07	1.14473e+08	1.00385e+08	1.46935e+08	2.86239e+07
10	4745000	1.48639e+07	3.69904e+07	4.96191e+07	1.60482e+07	3.84711e+07	4.73259e+07	5.5929e+07	3.25064e+07	1.28665e+08	7.68451e+07	1.25631e+08	3.75287e+07	2.11109e+08	1.51421e+08	2.55717e+08	4.34639e+07	2.53431e+08	2.02314e+08	3.33217e+08	4.56222e+07	2.53431e+08	2.02314e+08	3.33217e+08	2.91233e+09			10	2.80856e+06	8.79794e+06	2.18946e+07	2.93695e+07	9.49893e+06	2.2771e+07	2.80121e+07	3.31043e+07	1.92405e+07	7.61564e+07	4.54845e+07	7.43608e+07	2.22132e+07	1.24955e+08	8.9626e+07	1.51358e+08	2.57262e+07	1.50006e+08	1.1975e+08	1.9723e+08	2.70037e+07
YEARLY WATER PRODUCTION [m3/year]																												YEARLY WATER PRODUCTION [m3/year]
	m3/y	m3/y	m3/y	m3/y	m3/y	m3/y	m3/y	m3/y	m3/y	m3/y	m3/y	m3/y	m3/y	m3/y	m3/y	m3/y	m3/y	m3/y	m3/y	m3/y	m3/y	m3/y	m3/y	m3/y	m3/y				m3/y	m3/y	m3/y	m3/y	m3/y	m3/y	m3/y	m3/y	m3/y	m3/y	m3/y	m3/y	m3/y	m3/y	m3/y	m3/y	m3/y	m3/y	m3/y	m3/y	m3/y
	HP	2_S	2_Ds	2_Dl	5_S	5_Ds	5_H	5_Dl	10_S	10_Ds	10_H	10_Dl	25_S	25_Ds	25_H	25_Dl	50_S	50_Ds	50_H	50_Dl	50_S2	50_Ds2	50_H2	50_Dl2	Truck (1)				HP	2_S	2_Ds	2_Dl	5_S	5_Ds	5_H	5_Dl	10_S	10_Ds	10_H	10_Dl	25_S	25_Ds	25_H	25_Dl	50_S	50_Ds	50_H	50_Dl	50_S2
1	2737.5	5110	5110	7300	12775	12775	18250	18250	25550	25550	43800	43800	63875	63875	109500	109500	127750	127750	219000	219000	127750	127750	219000	219000	109500			1	2737.5	5110	5110	7300	12775	12775	18250	18250	25550	25550	43800	43800	63875	63875	109500	109500	127750	127750	219000	219000	127750
2	2737.5	5110	5110	7300	12775	12775	18250	18250	25550	25550	43800	43800	63875	63875	109500	109500	127750	127750	219000	219000	127750	127750	219000	219000	109500			2	2582.55	4820.75	4820.75	6886.79	12051.9	12051.9	17217	17217	24103.8	24103.8	41320.8	41320.8	60259.4	60259.4	103302	103302	120519	120519	206604	206604	120519
3	2737.5	5110	5110	7300	12775	12775	18250	18250	25550	25550	43800	43800	63875	63875	109500	109500	127750	127750	219000	219000	127750	127750	219000	219000	109500			3	2436.37	4547.88	4547.88	6496.97	11369.7	11369.7	16242.4	16242.4	22739.4	22739.4	38981.8	38981.8	56848.5	56848.5	97454.6	97454.6	113697	113697	194909	194909	113697
4	2737.5	5110	5110	7300	12775	12775	18250	18250	25550	25550	43800	43800	63875	63875	109500	109500	127750	127750	219000	219000	127750	127750	219000	219000	109500			4	2298.46	4290.45	4290.45	6129.22	10726.1	10726.1	15323.1	15323.1	21452.3	21452.3	36775.3	36775.3	53630.7	53630.7	91938.3	91938.3	107261	107261	183877	183877	107261
5	2737.5	5110	5110	7300	12775	12775	18250	18250	25550	25550	43800	43800	63875	63875	109500	109500	127750	127750	219000	219000	127750	127750	219000	219000	109500			5	2168.36	4047.6	4047.6	5782.28	10119	10119	14455.7	14455.7	20238	20238	34693.7	34693.7	50595	50595	86734.3	86734.3	101190	101190	173469	173469	101190
6	2737.5	5110	5110	7300	12775	12775	18250	18250	25550	25550	43800	43800	63875	63875	109500	109500	127750	127750	219000	219000	127750	127750	219000	219000	109500			6	2045.62	3818.49	3818.49	5454.98	9546.22	9546.22	13637.5	13637.5	19092.4	19092.4	32729.9	32729.9	47731.1	47731.1	81824.8	81824.8	95462.2	95462.2	163650	163650	95462.2
7	2737.5	5110	5110	7300	12775	12775	18250	18250	25550	25550	43800	43800	63875	63875	109500	109500	127750	127750	219000	219000	127750	127750	219000	219000	109500			7	1929.83	3602.35	3602.35	5146.21	9005.87	9005.87	12865.5	12865.5	18011.7	18011.7	30877.3	30877.3	45029.4	45029.4	77193.2	77193.2	90058.7	90058.7	154386	154386	90058.7
8	2737.5	5110	5110	7300	12775	12775	18250	18250	25550	25550	43800	43800	63875	63875	109500	109500	127750	127750	219000	219000	127750	127750	219000	219000	109500			8	1820.59	3398.44	3398.44	4854.92	8496.1	8496.1	12137.3	12137.3	16992.2	16992.2	29129.5	29129.5	42480.5	42480.5	72823.8	72823.8	84961	84961	145648	145648	84961
9	2737.5	5110	5110	7300	12775	12775	18250	18250	25550	25550	43800	43800	63875	63875	109500	109500	127750	127750	219000	219000	127750	127750	219000	219000	109500			9	1717.54	3206.08	3206.08	4580.11	8015.19	8015.19	11450.3	11450.3	16030.4	16030.4	27480.7	27480.7	40076	40076	68701.7	68701.7	80151.9	80151.9	137403	137403	80151.9
10	2737.5	5110	5110	7300	12775	12775	18250	18250	25550	25550	43800	43800	63875	63875	109500	109500	127750	127750	219000	219000	127750	127750	219000	219000	109500			10	1620.32	3024.6	3024.6	4320.86	7561.5	7561.5	10802.1	10802.1	15123	15123	25925.2	25925.2	37807.5	37807.5	64812.9	64812.9	75615	75615	129626	129626	75615
CUMULATIVE WATER PRODUCTION [m3]																												CUMULATIVE WATER PRODUCTION [m3]
	m3	m3	m3	m3	m3	m3	m3	m3	m3	m3	m3	m3	m3	m3	m3	m3	m3	m3	m3	m3	m3	m3	m3	m3	m3				m3	m3	m3	m3	m3	m3	m3	m3	m3	m3	m3	m3	m3	m3	m3	m3	m3	m3	m3	m3	m3
	HP	2_S	2_Ds	2_Dl	5_S	5_Ds	5_H	5_Dl	10_S	10_Ds	10_H	10_Dl	25_S	25_Ds	25_H	25_Dl	50_S	50_Ds	50_H	50_Dl	50_S2	50_Ds2	50_H2	50_Dl2	Truck (1)				HP	2_S	2_Ds	2_Dl	5_S	5_Ds	5_H	5_Dl	10_S	10_Ds	10_H	10_Dl	25_S	25_Ds	25_H	25_Dl	50_S	50_Ds	50_H	50_Dl	50_S2
1	2737.5	5110	5110	7300	12775	12775	18250	18250	25550	25550	43800	43800	63875	63875	109500	109500	127750	127750	219000	219000	127750	127750	219000	219000	109500			1	2737.5	5110	5110	7300	12775	12775	18250	18250	25550	25550	43800	43800	63875	63875	109500	109500	127750	127750	219000	219000	127750
2	5475	10220	10220	14600	25550	25550	36500	36500	51100	51100	87600	87600	127750	127750	219000	219000	255500	255500	438000	438000	255500	255500	438000	438000	219000			2	5320.05	9930.75	9930.75	14186.8	24826.9	24826.9	35467	35467	49653.8	49653.8	85120.8	85120.8	124134	124134	212802	212802	248269	248269	425604	425604	248269
3	8212.5	15330	15330	21900	38325	38325	54750	54750	76650	76650	131400	131400	191625	191625	328500	328500	383250	383250	657000	657000	383250	383250	657000	657000	328500			3	7756.41	14478.6	14478.6	20683.8	36196.6	36196.6	51709.4	51709.4	72393.2	72393.2	124103	124103	180983	180983	310256	310256	361966	361966	620513	620513	361966
4	10950	20440	20440	29200	51100	51100	73000	73000	102200	102200	175200	175200	255500	255500	438000	438000	511000	511000	876000	876000	511000	511000	876000	876000	438000			4	10054.9	18769.1	18769.1	26813	46922.7	46922.7	67032.5	67032.5	93845.5	93845.5	160878	160878	234614	234614	402195	402195	469227	469227	804390	804390	469227
5	13687.5	25550	25550	36500	63875	63875	91250	91250	127750	127750	219000	219000	319375	319375	547500	547500	638750	638750	1095000	1095000	638750	638750	1095000	1095000	547500			5	12223.2	22816.7	22816.7	32595.3	57041.7	57041.7	81488.2	81488.2	114083	114083	195572	195572	285209	285209	488929	488929	570417	570417	977858	977858	570417
6	16425	30660	30660	43800	76650	76650	109500	109500	153300	153300	262800	262800	383250	383250	657000	657000	766500	766500	1314000	1314000	766500	766500	1314000	1314000	657000			6	14268.8	26635.2	26635.2	38050.3	66587.9	66587.9	95125.6	95125.6	133176	133176	228302	228302	332940	332940	570754	570754	665879	665879	1.14151e+06	1.14151e+06	665879
7	19162.5	35770	35770	51100	89425	89425	127750	127750	178850	178850	306600	306600	447125	447125	766500	766500	894250	894250	1533000	1533000	894250	894250	1533000	1533000	766500			7	16198.7	30237.5	30237.5	43196.5	75593.8	75593.8	107991	107991	151188	151188	259179	259179	377969	377969	647947	647947	755938	755938	1.29589e+06	1.29589e+06	755938
8	21900	40880	40880	58400	102200	102200	146000	146000	204400	204400	350400	350400	511000	511000	876000	876000	1022000	1022000	1752000	1752000	1022000	1022000	1752000	1752000	876000			8	18019.3	33636	33636	48051.4	84089.9	84089.9	120128	120128	168180	168180	288308	288308	420450	420450	720771	720771	840899	840899	1.44154e+06	1.44154e+06	840899
9	24637.5	45990	45990	65700	114975	114975	164250	164250	229950	229950	394200	394200	574875	574875	985500	985500	1149750	1149750	1971000	1971000	1149750	1149750	1971000	1971000	985500			9	19736.8	36842	36842	52631.5	92105.1	92105.1	131579	131579	184210	184210	315789	315789	460526	460526	789472	789472	921051	921051	1.57894e+06	1.57894e+06	921051
10	27375	51100	51100	73000	127750	127750	182500	182500	255500	255500	438000	438000	638750	638750	1095000	1095000	1277500	1277500	2190000	2190000	1277500	1277500	2190000	2190000	1095000			10	21357.1	39866.6	39866.6	56952.4	99666.6	99666.6	142381	142381	199333	199333	341714	341714	498333	498333	854285	854285	996666	996666	1.70857e+06	1.70857e+06	996666
CUMULATIVE COSTS [UGX]																												NPV - DISCOUNT RATE = 7.5%
	UGX	UGX	UGX	UGX	UGX	UGX	UGX	UGX	UGX	UGX	UGX	UGX	UGX	UGX	UGX	UGX	UGX	UGX	UGX	UGX	UGX	UGX	UGX	UGX	UGX				UGX	UGX	UGX	UGX	UGX	UGX	UGX	UGX	UGX	UGX	UGX	UGX	UGX	UGX	UGX	UGX	UGX	UGX	UGX	UGX	UGX
	HP	2_S	2_Ds	2_Dl	5_S	5_Ds	5_H	5_Dl	10_S	10_Ds	10_H	10_Dl	25_S	25_Ds	25_H	25_Dl	50_S	50_Ds	50_H	50_Dl	50_S2	50_Ds2	50_H2	50_Dl2	Truck (1)				HP	2_S	2_Ds	2_Dl	5_S	5_Ds	5_H	5_Dl	10_S	10_Ds	10_H	10_Dl	25_S	25_Ds	25_H	25_Dl	50_S	50_Ds	50_H	50_Dl	50_S2
1	24885744	1.90843e+08	2.38006e+08	2.53977e+08	6.9584e+08	6.65791e+08	8.67085e+08	7.89569e+08	9.55549e+08	8.75602e+08	1.28756e+09	1.12836e+09	1.42789e+09	1.28643e+09	1.91549e+09	1.66846e+09	2.17118e+09	1.82565e+09	3.13076e+09	2.66716e+09	1.8731e+09	1.52094e+09	2.62431e+09	2.15623e+09	3.29764e+09			1	24885744	1.90843e+08	2.38006e+08	2.53977e+08	6.9584e+08	6.65791e+08	8.67085e+08	7.89569e+08	9.55549e+08	8.75602e+08	1.28756e+09	1.12836e+09	1.42789e+09	1.28643e+09	1.91549e+09	1.66846e+09	2.17118e+09	1.82565e+09	3.13076e+09	2.66716e+09	1.8731e+09
2	29630744	2.05707e+08	2.74996e+08	2.96569e+08	7.11888e+08	7.04263e+08	8.89714e+08	8.33901e+08	9.88055e+08	9.40405e+08	1.34544e+09	1.2368e+09	1.46542e+09	1.40524e+09	2.01569e+09	1.87673e+09	2.21464e+09	1.97768e+09	3.26034e+09	2.93177e+09	1.91873e+09	1.67297e+09	2.75389e+09	2.42084e+09	6.16251e+09			2	2.93622e+07	2.04865e+08	2.72902e+08	2.94158e+08	7.1098e+08	7.02085e+08	8.88433e+08	8.31392e+08	9.86215e+08	9.36737e+08	1.34216e+09	1.23066e+09	1.4633e+09	1.39851e+09	2.01001e+09	1.86494e+09	2.21218e+09	1.96907e+09	3.253e+09	2.91679e+09	1.91614e+09
3	35929128	2.20571e+08	3.02644e+08	3.39161e+08	7.27937e+08	7.33055e+08	9.12342e+08	8.78233e+08	1.02056e+09	1.02437e+09	1.40332e+09	1.32608e+09	1.50295e+09	1.55174e+09	2.11588e+09	2.05731e+09	2.2581e+09	2.16013e+09	3.38992e+09	3.16596e+09	1.96435e+09	1.85543e+09	2.88346e+09	2.65503e+09	8.9997e+09			3	3.49677e+07	2.18094e+08	2.97509e+08	3.32065e+08	7.25263e+08	7.2771e+08	9.08572e+08	8.70847e+08	1.01515e+09	1.01146e+09	1.39368e+09	1.31012e+09	1.4967e+09	1.52889e+09	2.09919e+09	2.02565e+09	2.25086e+09	2.13146e+09	3.36833e+09	3.12522e+09	1.95675e+09
4	40674128	2.35435e+08	3.39635e+08	3.72411e+08	7.43985e+08	7.71527e+08	9.3497e+08	9.12887e+08	1.05307e+09	1.08917e+09	1.4612e+09	1.43452e+09	1.54048e+09	1.67054e+09	2.21608e+09	2.26557e+09	2.30157e+09	2.31217e+09	3.51949e+09	3.43057e+09	2.00997e+09	2.00746e+09	3.01304e+09	2.91964e+09	1.18646e+10			4	3.89517e+07	2.30574e+08	3.28567e+08	3.59982e+08	7.38737e+08	7.60012e+08	9.27571e+08	8.99943e+08	1.04244e+09	1.06587e+09	1.44228e+09	1.40117e+09	1.52821e+09	1.62865e+09	2.18331e+09	2.20052e+09	2.28736e+09	2.25911e+09	3.47712e+09	3.34739e+09	1.99505e+09
5	42419128	2.50299e+08	3.67283e+08	4.43828e+08	7.60033e+08	8.00319e+08	9.82296e+08	9.91398e+08	1.08557e+09	1.15397e+09	1.55721e+09	1.54099e+09	1.57801e+09	1.78935e+09	2.39519e+09	2.4936e+09	2.34503e+09	2.4642e+09	3.75223e+09	3.73337e+09	2.05559e+09	2.15949e+09	3.24578e+09	3.22244e+09	1.47492e+10			5	4.03339e+07	2.42348e+08	3.50467e+08	4.16551e+08	7.51449e+08	7.82818e+08	9.65058e+08	9.62132e+08	1.06819e+09	1.1172e+09	1.51832e+09	1.4855e+09	1.55793e+09	1.72276e+09	2.32519e+09	2.38114e+09	2.32178e+09	2.37953e+09	3.66147e+09	3.58724e+09	2.03119e+09
6	51717512	2.65162e+08	4.26072e+08	4.8642e+08	7.76081e+08	8.61373e+08	1.00492e+09	1.03573e+09	1.11808e+09	1.23793e+09	1.61509e+09	1.69413e+09	1.61554e+09	1.93585e+09	2.49538e+09	2.76648e+09	2.3885e+09	2.64665e+09	3.88181e+09	4.06896e+09	2.10122e+09	2.34195e+09	3.37536e+09	3.55803e+09	1.76787e+10			6	4.72822e+07	2.53455e+08	3.94397e+08	4.48378e+08	7.63441e+08	8.28441e+08	9.81967e+08	9.95259e+08	1.09248e+09	1.17994e+09	1.56157e+09	1.59994e+09	1.58598e+09	1.83223e+09	2.40006e+09	2.58505e+09	2.35426e+09	2.51587e+09	3.7583e+09	3.83801e+09	2.06528e+09
7	53462512	2.92449e+08	4.60747e+08	5.29012e+08	8.15472e+08	9.01763e+08	1.0393e+09	1.08006e+09	1.1629e+09	1.30274e+09	1.68528e+09	1.79572e+09	1.675e+09	2.05466e+09	2.61752e+09	2.94705e+09	2.51928e+09	2.79869e+09	4.09871e+09	4.30315e+09	2.23416e+09	2.49398e+09	3.50494e+09	3.79222e+09	2.05159e+10			7	4.85123e+07	2.72691e+08	4.18842e+08	4.78404e+08	7.9121e+08	8.56914e+08	1.0062e+09	1.02651e+09	1.12407e+09	1.22563e+09	1.61105e+09	1.67155e+09	1.6279e+09	1.91599e+09	2.48616e+09	2.71235e+09	2.44646e+09	2.62305e+09	3.9112e+09	4.00311e+09	2.159e+09
8	58207512	3.07313e+08	4.97737e+08	5.62262e+08	8.31521e+08	9.40234e+08	1.06193e+09	1.11472e+09	1.2126e+09	1.38473e+09	1.74316e+09	1.90415e+09	1.75998e+09	2.22092e+09	2.71771e+09	3.15532e+09	2.63135e+09	3.01933e+09	4.22829e+09	4.56776e+09	2.34839e+09	2.71462e+09	3.63452e+09	4.05683e+09	2.33808e+10			8	5.1668e+07	2.82577e+08	4.43443e+08	5.00517e+08	8.01883e+08	8.825e+08	1.02125e+09	1.04956e+09	1.15712e+09	1.28016e+09	1.64955e+09	1.74367e+09	1.68442e+09	2.02656e+09	2.55279e+09	2.85086e+09	2.52099e+09	2.76979e+09	3.99738e+09	4.17909e+09	2.23497e+09
9	64505896	3.22177e+08	5.25386e+08	6.26652e+08	8.47569e+08	9.69027e+08	1.08456e+09	1.18163e+09	1.2451e+09	1.4687e+09	1.8202e+09	1.99343e+09	1.79751e+09	2.36742e+09	2.8456e+09	3.3359e+09	2.67481e+09	3.20178e+09	4.38828e+09	4.80195e+09	2.39401e+09	2.89707e+09	3.79451e+09	4.29103e+09	2.62179e+10			9	5.56197e+07	2.91902e+08	4.6079e+08	5.40916e+08	8.11952e+08	9.00565e+08	1.03545e+09	1.09154e+09	1.17752e+09	1.33284e+09	1.69788e+09	1.79968e+09	1.70796e+09	2.11847e+09	2.63303e+09	2.96415e+09	2.54826e+09	2.88426e+09	4.09777e+09	4.32602e+09	2.26359e+09
10	69250896	3.37041e+08	5.62376e+08	6.76271e+08	8.63617e+08	1.0075e+09	1.13188e+09	1.23756e+09	1.27761e+09	1.59736e+09	1.89704e+09	2.11906e+09	1.83504e+09	2.57853e+09	2.99702e+09	3.59161e+09	2.71828e+09	3.45521e+09	4.5906e+09	5.13517e+09	2.43963e+09	3.1505e+09	3.99683e+09	4.62424e+09	2.91303e+10			10	5.84283e+07	3.007e+08	4.82684e+08	5.70286e+08	8.21451e+08	9.23336e+08	1.06346e+09	1.12465e+09	1.19676e+09	1.40899e+09	1.74337e+09	1.87405e+09	1.73017e+09	2.24343e+09	2.72266e+09	3.11551e+09	2.57399e+09	3.03427e+09	4.21752e+09	4.52325e+09	2.2906e+09
CUMULATIVE COSTS PER M3 OF WATER [UGX/m3]																												LWC - DISCOUNT RATE = 7.5%
	UGX/m3	UGX/m3	UGX/m3	UGX/m3	UGX/m3	UGX/m3	UGX/m3	UGX/m3	UGX/m3	UGX/m3	UGX/m3	UGX/m3	UGX/m3	UGX/m3	UGX/m3	UGX/m3	UGX/m3	UGX/m3	UGX/m3	UGX/m3	UGX/m3	UGX/m3	UGX/m3	UGX/m3	UGX/m4	UGX/m5			UGX/m3	UGX/m3	UGX/m3	UGX/m3	UGX/m3	UGX/m3	UGX/m3	UGX/m3	UGX/m3	UGX/m3	UGX/m3	UGX/m3	UGX/m3	UGX/m3	UGX/m3	UGX/m3	UGX/m3	UGX/m3	UGX/m3	UGX/m3	UGX/m3
	HP	2_S	2_Ds	2_Dl	5_S	5_Ds	5_H	5_Dl	10_S	10_Ds	10_H	10_Dl	25_S	25_Ds	25_H	25_Dl	50_S	50_Ds	50_H	50_Dl	50_S2	50_Ds2	50_H2	50_Dl2	Truck (1)	0			HP	2_S	2_Ds	2_Dl	5_S	5_Ds	5_H	5_Dl	10_S	10_Ds	10_H	10_Dl	25_S	25_Ds	25_H	25_Dl	50_S	50_Ds	50_H	50_Dl	50_S2
1	9090.68	37346.9	46576.4	34791.3	54468.9	52116.8	47511.5	43264.1	37399.2	34270.1	29396.3	25761.7	22354.5	20139.7	17493.1	15237.1	16995.5	14290.8	14295.7	12178.8	14662.3	11905.6	11983.1	9845.79	30115.4	24261.3		1	9090.68	37346.9	46576.4	34791.3	54468.9	52116.8	47511.5	43264.1	37399.2	34270.1	29396.3	25761.7	22354.5	20139.7	17493.1	15237.1	16995.5	14290.8	14295.7	12178.8	14662.3
2	5412.01	20127.9	26907.6	20312.9	27862.6	27564.1	24375.7	22846.6	19335.7	18403.2	15358.9	14118.7	11471	10999.9	9204.04	8569.54	8667.87	7740.43	7443.69	6693.53	7509.69	6547.84	6287.41	5527.03	28139.3	24261.3		2	5519.15	20629.4	27480.5	20734.6	28637.5	28279.2	25049.6	23441.3	19861.8	18865.4	15767.7	14457.8	11788	11266.1	9445.47	8763.74	8910.42	7931.22	7643.26	6853.3	7718.02
3	4374.93	14388.2	19742	15486.8	18993.8	19127.3	16663.8	16040.8	13314.6	13364.2	10679.8	10091.9	7843.18	8097.77	6441.04	6262.73	5891.99	5636.36	5159.69	4818.81	5125.5	4841.29	4388.83	4041.14	27396.3	24261.3		3	4508.23	15063.2	20548.1	16054.4	20036.8	20104.4	17570.7	16841.2	14022.7	13971.8	11230	10556.7	8269.82	8447.73	6765.97	6528.97	6218.44	5888.56	5428.29	5036.51	5405.89
4	3714.53	11518.3	16616.2	12753.8	14559.4	15098.4	12807.8	12505.3	10304	10657.2	8340.19	8187.88	6029.27	6538.34	5059.53	5172.54	4504.05	4524.79	4017.69	3916.18	3933.41	3928.49	3439.55	3332.93	27088.1	24261.3		4	3873.91	12284.8	17505.7	13425.7	15743.7	16197.1	13837.6	13425.5	11108	11357.7	8965.03	8709.5	6513.71	6941.84	5428.5	5471.28	4874.73	4814.53	4322.69	4161.41	4251.78
5	3099.11	9796.42	14375.1	12159.7	11898.8	12529.5	10764.9	10864.6	8497.65	9033.05	7110.53	7036.48	4940.92	5602.68	4374.77	4554.52	3671.28	3857.85	3426.69	3409.47	3218.15	3380.81	2964.18	2942.87	26939.2	24261.3		5	3299.77	10621.5	15360.1	12779.5	13173.7	13723.6	11842.9	11807	9363.21	9792.85	7763.49	7595.69	5462.43	6040.34	4755.67	4870.11	4070.33	4171.57	3744.38	3668.46	3560.89
6	3148.71	8648.48	13896.7	11105.5	10125	11237.7	9177.4	9458.72	7293.42	8075.24	6145.69	6446.46	4215.36	5051.15	3798.15	4210.77	3116.11	3452.91	2954.19	3096.62	2741.31	3055.38	2568.76	2707.79	26908.2	24261.3		6	3313.67	9515.8	14807.4	11783.8	11465.2	12441.3	10322.8	10462.6	8203.27	8860.04	6839.95	7008	4763.55	5503.19	4205.07	4529.18	3535.57	3778.27	3292.4	3362.23	3101.59
7	2789.95	8175.82	12880.8	10352.5	9119.07	10084	8135.41	8454.5	6502.07	7283.97	5496.66	5856.87	3746.17	4595.28	3414.9	3844.82	2817.2	3129.65	2673.65	2807.01	2498.36	2788.91	2286.32	2473.73	26765.7	24261.3		7	2994.83	9018.3	13851.7	11075.1	10466.6	11335.8	9317.42	9505.51	7434.94	8106.66	6215.99	6449.42	4306.97	5069.16	3836.98	4186.06	3236.32	3469.93	3018.15	3089.07	2856.05
8	2657.88	7517.45	12175.6	9627.77	8136.21	9199.94	7273.48	7635.04	5932.47	6774.63	4974.77	5434.23	3444.19	4346.23	3102.41	3601.96	2574.71	2954.33	2413.41	2607.17	2297.83	2656.18	2074.49	2315.54	26690.4	24261.3		8	2867.38	8401.02	13183.6	10416.3	9536.02	10494.7	8501.31	8736.96	6880.28	7611.85	5721.47	6047.93	4006.22	4819.98	3541.76	3955.29	2997.97	3293.84	2772.99	2899.04	2657.83
9	2618.2	7005.37	11423.9	9538.08	7371.77	8428.15	6603.08	7194.1	5414.67	6387.02	4617.45	5056.91	3126.79	4118.15	2887.47	3384.98	2326.43	2784.76	2226.43	2436.3	2082.2	2519.74	1925.17	2177.08	26603.7	24261.3		9	2818.07	7923.08	12507.2	10277.4	8815.5	9777.58	7869.4	8295.72	6392.26	7235.42	5376.64	5699.01	3708.72	4600.12	3335.18	3754.6	2766.69	3131.49	2595.26	2739.82	2457.62
10	2529.71	6595.71	11005.4	9263.99	6760.21	7886.48	6202.09	6781.15	5000.43	6251.9	4331.15	4838.04	2872.86	4036.84	2737	3280.01	2127.81	2704.67	2096.16	2344.83	1909.69	2466.15	1825.04	2111.53	26603	24261.3		10	2735.77	7542.65	12107.5	10013.4	8241.99	9264.24	7469.11	7898.85	6003.81	7068.54	5101.83	5484.25	3471.92	4501.87	3187.06	3646.92	2582.6	3044.42	2468.45	2647.39	2298.26
[truncated: 32 more columns]

## Sheet: O&M_USD
	HP	2_S	2_Ds	2_Dl	5_S	5_Ds	5_H	5_Dl	10_S	10_Ds	10_H	10_Dl	25_S	25_Ds	25_H	25_Dl	50_S	50_Ds	50_H	50_Dl	50_S2	50_Ds2	50_H2	50_Dl2					UGX to USD
m3/day	7.5	14	14	20	35	35	50	50	70	70	120	120	175	175	300	300	350	350	600	600	350	350	600	600
m3 / year	2737.5	5110	5110	7300	12775	12775	18250	18250	25550	25550	43800	43800	63875	63875	109500	109500	127750	127750	219000	219000	127750	127750	219000	219000					0.000278
Yearly O&M O&M	485.11	4132.17	7686.24	9243.48	4461.41	8004.39	6290.71	9633.69	9036.78	18015.3	16091	24819.5	10433	33029.1	27854.2	50200.3	12083	42265.4	36023	65105.4	12683	42265.4	36023	65105.4
DISCOUNT RATE	0																											DISCOUNT RATE	0.06
YEARLY COSTS [USD/YEAR]																												YEARLY COSTS [USD/YEAR]
	USD/y	USD/y	USD/y	USD/y	USD/y	USD/y	USD/y	USD/y	USD/y	USD/y	USD/y	USD/y	USD/y	USD/y	USD/y	USD/y	USD/y	USD/y	USD/y	USD/y	USD/y	USD/y	USD/y	USD/y					USD/y	USD/y	USD/y	USD/y	USD/y	USD/y	USD/y	USD/y	USD/y	USD/y	USD/y	USD/y	USD/y	USD/y	USD/y	USD/y	USD/y	USD/y	USD/y	USD/y	USD/y
	HP	2_S	2_Ds	2_Dl	5_S	5_Ds	5_H	5_Dl	10_S	10_Ds	10_H	10_Dl	25_S	25_Ds	25_H	25_Dl	50_S	50_Ds	50_H	50_Dl	50_S2	50_Ds2	50_H2	50_Dl2					HP	2_S	2_Ds	2_Dl	5_S	5_Ds	5_H	5_Dl	10_S	10_Ds	10_H	10_Dl	25_S	25_Ds	25_H	25_Dl	50_S	50_Ds	50_H	50_Dl	50_S2
1	485.11	4132.17	7686.24	9243.48	4461.41	8004.39	6290.71	9633.69	9036.78	18015.3	16091	24819.5	10433	33029.1	27854.2	50200.3	12083	42265.4	36023	65105.4	12683	42265.4	36023	65105.4				1	485.11	4132.17	7686.24	9243.48	4461.41	8004.39	6290.71	9633.69	9036.78	18015.3	16091	24819.5	10433	33029.1	27854.2	50200.3	12083	42265.4	36023	65105.4	12683
2	1319.11	4132.17	10283.3	11840.6	4461.41	10695	6290.71	12324.3	9036.78	18015.3	16091	30145.6	10433	33029.1	27854.2	57898.1	12083	42265.4	36023	73562	12683	42265.4	36023	73562				2	1244.44	3898.28	9701.26	11170.4	4208.88	10089.6	5934.64	11626.7	8525.26	16995.5	15180.2	28439.2	9842.43	31159.5	26277.6	54620.9	11399	39873	33984	69398.1	11965.1
3	1750.95	4132.17	7686.24	11840.6	4461.41	8004.39	6290.71	12324.3	9036.78	23341.3	16091	24819.5	10433	40726.9	27854.2	50200.3	12083	50721.9	36023	65105.4	12683	50721.9	36023	65105.4				3	1558.34	3677.62	6840.73	10538.1	3970.64	7123.88	5598.71	10968.6	8042.7	20773.7	14321	22089.3	9285.31	36246.8	24790.2	44678.1	10753.8	45142.3	32060.4	57943.6	11287.8
4	1319.11	4132.17	10283.3	9243.48	4461.41	10695	6290.71	9633.69	9036.78	18015.3	16091	30145.6	10433	33029.1	27854.2	57898.1	12083	42265.4	36023	73562	12683	42265.4	36023	73562				4	1107.55	3469.45	8634.08	7761	3745.89	8979.71	5281.8	8088.63	7587.46	15126	13510.3	25310.8	8759.72	27731.9	23387	48612.4	10145.1	35486.8	30245.6	61764.1	10648.9
5	485.11	4132.17	7686.24	19854	4461.41	8004.39	13156.6	21826.3	9036.78	18015.3	26689	29599.4	10433	33029.1	49792.9	63391.5	12083	42265.4	64700	84177.7	12683	42265.4	64700	84177.7				5	384.253	3273.07	6088.22	15726.2	3533.85	6340.23	10421.3	17288.5	7157.98	14269.8	21140.2	23445.5	8263.89	26162.1	39440.6	50212	9570.85	33478.1	51248.4	66676.6	10046.1
6	2584.95	4132.17	16343.2	11840.6	4461.41	16973	6290.71	12324.3	9036.78	23341.3	16091	42573	10433	40726.9	27854.2	75859.6	12083	50721.9	36023	93293.9	12683	50721.9	36023	93293.9				6	1931.63	3087.8	12212.6	8847.96	3333.83	12683.2	4700.79	9209.42	6752.81	17442	12024.1	31813	7796.12	30433.5	20814.3	56686.7	9029.1	37902.4	26918.5	69714.6	9477.45
7	485.11	7585.72	9639.79	11840.6	10950.7	11228.4	9556.02	12324.3	12458.6	18015.3	19512.8	28241.3	16532.5	33029.1	33953.8	50200.3	36357.9	42265.4	60298	65105.4	36957.9	42265.4	36023	65105.4				7	341.983	5347.63	6795.67	8347.14	7719.81	7915.55	6736.62	8688.13	8782.8	12700	13755.8	19909	11654.8	23284.2	23936.1	35389.3	25630.9	29795.4	42507.7	45896.8	26053.9
8	1319.11	4132.17	10283.3	9243.48	4461.41	10695	6290.71	9633.69	13816.7	22795.1	16091	30145.6	23624.1	46220.2	27854.2	57898.1	31155.2	61337.6	36023	73562	31755.2	61337.6	36023	73562				8	877.283	2748.13	6839	6147.44	2967.09	7112.77	4183.68	6406.96	9188.86	15160.1	10701.4	20048.5	15711.4	30739.1	18524.7	38505.6	20720	40793	23957.4	48922.9	21119
9	1750.95	4132.17	7686.24	17900.5	4461.41	8004.39	6290.71	18602.3	9036.78	23341.3	21417.1	24819.5	10433	40726.9	35552	50200.3	12083	50721.9	44479.6	65105.4	12683	50721.9	44479.6	65105.4				9	1098.57	2592.58	4822.44	11231	2799.14	5022.05	3946.87	11671.3	5669.79	14644.6	13437.3	15572.1	6545.78	25552.5	22305.8	31496.3	7581.01	31823.6	27907	40848	7957.45
10	1319.11	4132.17	10283.3	13794.1	4461.41	10695	13156.6	15548.3	9036.78	35768.8	21363	34925.4	10433	58688.4	42095.1	71089.3	12083	70453.9	56243.4	92634.2	12683	70453.9	56243.4	92634.2				10	780.779	2445.83	6086.69	8164.72	2640.7	6330.34	7787.37	9202.99	5348.86	21171.5	12644.7	20672.3	6175.26	34737.6	24916	42077.6	7151.89	41701.5	33290.4	54830.1	7507.03
YEARLY WATER PRODUCTION [m3/year]																												YEARLY WATER PRODUCTION [m3/year]
	m3/y	m3/y	m3/y	m3/y	m3/y	m3/y	m3/y	m3/y	m3/y	m3/y	m3/y	m3/y	m3/y	m3/y	m3/y	m3/y	m3/y	m3/y	m3/y	m3/y	m3/y	m3/y	m3/y	m3/y					m3/y	m3/y	m3/y	m3/y	m3/y	m3/y	m3/y	m3/y	m3/y	m3/y	m3/y	m3/y	m3/y	m3/y	m3/y	m3/y	m3/y	m3/y	m3/y	m3/y	m3/y
	HP	2_S	2_Ds	2_Dl	5_S	5_Ds	5_H	5_Dl	10_S	10_Ds	10_H	10_Dl	25_S	25_Ds	25_H	25_Dl	50_S	50_Ds	50_H	50_Dl	50_S2	50_Ds2	50_H2	50_Dl2					HP	2_S	2_Ds	2_Dl	5_S	5_Ds	5_H	5_Dl	10_S	10_Ds	10_H	10_Dl	25_S	25_Ds	25_H	25_Dl	50_S	50_Ds	50_H	50_Dl	50_S2
1	2737.5	5110	5110	7300	12775	12775	18250	18250	25550	25550	43800	43800	63875	63875	109500	109500	127750	127750	219000	219000	127750	127750	219000	219000				1	2737.5	5110	5110	7300	12775	12775	18250	18250	25550	25550	43800	43800	63875	63875	109500	109500	127750	127750	219000	219000	127750
2	2737.5	5110	5110	7300	12775	12775	18250	18250	25550	25550	43800	43800	63875	63875	109500	109500	127750	127750	219000	219000	127750	127750	219000	219000				2	2582.55	4820.75	4820.75	6886.79	12051.9	12051.9	17217	17217	24103.8	24103.8	41320.8	41320.8	60259.4	60259.4	103302	103302	120519	120519	206604	206604	120519
3	2737.5	5110	5110	7300	12775	12775	18250	18250	25550	25550	43800	43800	63875	63875	109500	109500	127750	127750	219000	219000	127750	127750	219000	219000				3	2436.37	4547.88	4547.88	6496.97	11369.7	11369.7	16242.4	16242.4	22739.4	22739.4	38981.8	38981.8	56848.5	56848.5	97454.6	97454.6	113697	113697	194909	194909	113697
4	2737.5	5110	5110	7300	12775	12775	18250	18250	25550	25550	43800	43800	63875	63875	109500	109500	127750	127750	219000	219000	127750	127750	219000	219000				4	2298.46	4290.45	4290.45	6129.22	10726.1	10726.1	15323.1	15323.1	21452.3	21452.3	36775.3	36775.3	53630.7	53630.7	91938.3	91938.3	107261	107261	183877	183877	107261
5	2737.5	5110	5110	7300	12775	12775	18250	18250	25550	25550	43800	43800	63875	63875	109500	109500	127750	127750	219000	219000	127750	127750	219000	219000				5	2168.36	4047.6	4047.6	5782.28	10119	10119	14455.7	14455.7	20238	20238	34693.7	34693.7	50595	50595	86734.3	86734.3	101190	101190	173469	173469	101190
6	2737.5	5110	5110	7300	12775	12775	18250	18250	25550	25550	43800	43800	63875	63875	109500	109500	127750	127750	219000	219000	127750	127750	219000	219000				6	2045.62	3818.49	3818.49	5454.98	9546.22	9546.22	13637.5	13637.5	19092.4	19092.4	32729.9	32729.9	47731.1	47731.1	81824.8	81824.8	95462.2	95462.2	163650	163650	95462.2
7	2737.5	5110	5110	7300	12775	12775	18250	18250	25550	25550	43800	43800	63875	63875	109500	109500	127750	127750	219000	219000	127750	127750	219000	219000				7	1929.83	3602.35	3602.35	5146.21	9005.87	9005.87	12865.5	12865.5	18011.7	18011.7	30877.3	30877.3	45029.4	45029.4	77193.2	77193.2	90058.7	90058.7	154386	154386	90058.7
8	2737.5	5110	5110	7300	12775	12775	18250	18250	25550	25550	43800	43800	63875	63875	109500	109500	127750	127750	219000	219000	127750	127750	219000	219000				8	1820.59	3398.44	3398.44	4854.92	8496.1	8496.1	12137.3	12137.3	16992.2	16992.2	29129.5	29129.5	42480.5	42480.5	72823.8	72823.8	84961	84961	145648	145648	84961
9	2737.5	5110	5110	7300	12775	12775	18250	18250	25550	25550	43800	43800	63875	63875	109500	109500	127750	127750	219000	219000	127750	127750	219000	219000				9	1717.54	3206.08	3206.08	4580.11	8015.19	8015.19	11450.3	11450.3	16030.4	16030.4	27480.7	27480.7	40076	40076	68701.7	68701.7	80151.9	80151.9	137403	137403	80151.9
10	2737.5	5110	5110	7300	12775	12775	18250	18250	25550	25550	43800	43800	63875	63875	109500	109500	127750	127750	219000	219000	127750	127750	219000	219000				10	1620.32	3024.6	3024.6	4320.86	7561.5	7561.5	10802.1	10802.1	15123	15123	25925.2	25925.2	37807.5	37807.5	64812.9	64812.9	75615	75615	129626	129626	75615
CUMULATIVE WATER PRODUCTION [m3]																												CUMULATIVE WATER PRODUCTION [m3]
	m3	m3	m3	m3	m3	m3	m3	m3	m3	m3	m3	m3	m3	m3	m3	m3	m3	m3	m3	m3	m3	m3	m3	m3					m3	m3	m3	m3	m3	m3	m3	m3	m3	m3	m3	m3	m3	m3	m3	m3	m3	m3	m3	m3	m3
	HP	2_S	2_Ds	2_Dl	5_S	5_Ds	5_H	5_Dl	10_S	10_Ds	10_H	10_Dl	25_S	25_Ds	25_H	25_Dl	50_S	50_Ds	50_H	50_Dl	50_S2	50_Ds2	50_H2	50_Dl2					HP	2_S	2_Ds	2_Dl	5_S	5_Ds	5_H	5_Dl	10_S	10_Ds	10_H	10_Dl	25_S	25_Ds	25_H	25_Dl	50_S	50_Ds	50_H	50_Dl	50_S2
1	2737.5	5110	5110	7300	12775	12775	18250	18250	25550	25550	43800	43800	63875	63875	109500	109500	127750	127750	219000	219000	127750	127750	219000	219000				1	2737.5	5110	5110	7300	12775	12775	18250	18250	25550	25550	43800	43800	63875	63875	109500	109500	127750	127750	219000	219000	127750
2	5475	10220	10220	14600	25550	25550	36500	36500	51100	51100	87600	87600	127750	127750	219000	219000	255500	255500	438000	438000	255500	255500	438000	438000				2	5320.05	9930.75	9930.75	14186.8	24826.9	24826.9	35467	35467	49653.8	49653.8	85120.8	85120.8	124134	124134	212802	212802	248269	248269	425604	425604	248269
3	8212.5	15330	15330	21900	38325	38325	54750	54750	76650	76650	131400	131400	191625	191625	328500	328500	383250	383250	657000	657000	383250	383250	657000	657000				3	7756.41	14478.6	14478.6	20683.8	36196.6	36196.6	51709.4	51709.4	72393.2	72393.2	124103	124103	180983	180983	310256	310256	361966	361966	620513	620513	361966
4	10950	20440	20440	29200	51100	51100	73000	73000	102200	102200	175200	175200	255500	255500	438000	438000	511000	511000	876000	876000	511000	511000	876000	876000				4	10054.9	18769.1	18769.1	26813	46922.7	46922.7	67032.5	67032.5	93845.5	93845.5	160878	160878	234614	234614	402195	402195	469227	469227	804390	804390	469227
5	13687.5	25550	25550	36500	63875	63875	91250	91250	127750	127750	219000	219000	319375	319375	547500	547500	638750	638750	1095000	1095000	638750	638750	1095000	1095000				5	12223.2	22816.7	22816.7	32595.3	57041.7	57041.7	81488.2	81488.2	114083	114083	195572	195572	285209	285209	488929	488929	570417	570417	977858	977858	570417
6	16425	30660	30660	43800	76650	76650	109500	109500	153300	153300	262800	262800	383250	383250	657000	657000	766500	766500	1314000	1314000	766500	766500	1314000	1314000				6	14268.8	26635.2	26635.2	38050.3	66587.9	66587.9	95125.6	95125.6	133176	133176	228302	228302	332940	332940	570754	570754	665879	665879	1.14151e+06	1.14151e+06	665879
7	19162.5	35770	35770	51100	89425	89425	127750	127750	178850	178850	306600	306600	447125	447125	766500	766500	894250	894250	1533000	1533000	894250	894250	1533000	1533000				7	16198.7	30237.5	30237.5	43196.5	75593.8	75593.8	107991	107991	151188	151188	259179	259179	377969	377969	647947	647947	755938	755938	1.29589e+06	1.29589e+06	755938
8	21900	40880	40880	58400	102200	102200	146000	146000	204400	204400	350400	350400	511000	511000	876000	876000	1022000	1022000	1752000	1752000	1022000	1022000	1752000	1752000				8	18019.3	33636	33636	48051.4	84089.9	84089.9	120128	120128	168180	168180	288308	288308	420450	420450	720771	720771	840899	840899	1.44154e+06	1.44154e+06	840899
9	24637.5	45990	45990	65700	114975	114975	164250	164250	229950	229950	394200	394200	574875	574875	985500	985500	1149750	1149750	1971000	1971000	1149750	1149750	1971000	1971000				9	19736.8	36842	36842	52631.5	92105.1	92105.1	131579	131579	184210	184210	315789	315789	460526	460526	789472	789472	921051	921051	1.57894e+06	1.57894e+06	921051
10	27375	51100	51100	73000	127750	127750	182500	182500	255500	255500	438000	438000	638750	638750	1095000	1095000	1277500	1277500	2190000	2190000	1277500	1277500	2190000	2190000				10	21357.1	39866.6	39866.6	56952.4	99666.6	99666.6	142381	142381	199333	199333	341714	341714	498333	498333	854285	854285	996666	996666	1.70857e+06	1.70857e+06	996666
CUMULATIVE COSTS [USD]																												CUMULATIVE COSTS [USD]
	USD	USD	USD	USD	USD	USD	USD	USD	USD	USD	USD	USD	USD	USD	USD	USD	USD	USD	USD	USD	USD	USD	USD	USD					USD	USD	USD	USD	USD	USD	USD	USD	USD	USD	USD	USD	USD	USD	USD	USD	USD	USD	USD	USD	USD
	HP	2_S	2_Ds	2_Dl	5_S	5_Ds	5_H	5_Dl	10_S	10_Ds	10_H	10_Dl	25_S	25_Ds	25_H	25_Dl	50_S	50_Ds	50_H	50_Dl	50_S2	50_Ds2	50_H2	50_Dl2					HP	2_S	2_Ds	2_Dl	5_S	5_Ds	5_H	5_Dl	10_S	10_Ds	10_H	10_Dl	25_S	25_Ds	25_H	25_Dl	50_S	50_Ds	50_H	50_Dl	50_S2
1	485.11	4132.17	7686.24	9243.48	4461.41	8004.39	6290.71	9633.69	9036.78	18015.3	16091	24819.5	10433	33029.1	27854.2	50200.3	12083	42265.4	36023	65105.4	12683	42265.4	36023	65105.4				1	485.11	4132.17	7686.24	9243.48	4461.41	8004.39	6290.71	9633.69	9036.78	18015.3	16091	24819.5	10433	33029.1	27854.2	50200.3	12083	42265.4	36023	65105.4	12683
2	1804.22	8264.34	17969.6	21084.1	8922.82	18699.4	12581.4	21958	18073.6	36030.5	32182	54965	20865.9	66058.2	55708.5	108098	24165.9	84530.8	72046	138667	25365.9	84530.8	72046	138667				2	1729.55	8030.45	17387.5	20413.8	8670.29	18094	12225.4	21260.4	17562	35010.8	31271.2	53258.7	20275.4	64188.6	54131.8	104821	23482	82138.4	70007	134504	24648
3	3555.17	12396.5	25655.8	32924.6	13384.2	26703.8	18872.1	34282.2	27110.3	59371.8	48273.1	79784.5	31298.9	106785	83562.7	158299	36248.9	135253	108069	203773	38048.9	135253	108069	203773				3	3287.89	11708.1	24228.2	30951.9	12640.9	25217.9	17824.1	32228.9	25604.7	55784.5	45592.2	75348	29560.7	100435	78922	149499	34235.8	127281	102067	192447	35935.8
4	4874.28	16528.7	35939.1	42168.1	17845.6	37398.7	25162.9	43915.9	36147.1	77387.1	64364.1	109930	41731.9	139814	111417	216197	48331.9	177518	144092	277335	50731.9	177518	144092	277335				4	4395.44	15177.5	32862.3	38712.9	16386.8	34197.6	23105.9	40317.6	33192.2	70910.4	59102.5	100659	38320.4	128167	102309	198112	44380.9	162768	132313	254211	46584.7
5	5359.39	20660.9	43625.4	62022.1	22307.1	45403.1	38319.4	65742.2	45183.9	95402.3	91053.1	139529	52164.9	172843	161210	279588	60414.9	219784	208792	361513	63414.9	219784	208792	361513				5	4779.7	18450.6	38950.5	54439.1	19920.7	40537.8	33527.1	57606	40350.2	85180.2	80242.7	124104	46584.3	154329	141750	248324	53951.7	196246	183561	320888	56630.8
6	7944.34	24793	59968.6	73862.7	26768.5	62376.1	44610.2	78066.5	54220.7	118744	107144	182102	62597.8	213570	189064	355448	72497.8	270505	244815	454806	76097.8	270505	244815	454806				6	6711.32	21538.4	51163.1	63287.1	23254.5	53221	38227.9	66815.4	47103	102622	92266.9	155917	54380.4	184763	162564	305010	62980.8	234148	210480	390602	66108.3
7	8429.45	32378.8	69608.4	85703.3	37719.2	73604.5	54166.2	90390.8	66679.2	136759	126657	210344	79130.4	246599	223018	405648	108856	312771	305113	519912	113056	312771	280838	519912				7	7053.31	26886	57958.8	71634.2	30974.3	61136.6	44964.5	75503.6	55885.8	115322	106023	175826	66035.2	208047	186500	340400	88611.8	263944	252988	436499	92162.1
8	9748.56	36510.9	79891.7	94946.7	42180.6	84299.5	60456.9	100024	80495.9	159554	142748	240489	102754	292819	250872	463547	140011	374108	341136	593474	144811	374108	316861	593474				8	7930.59	29634.1	64797.8	77781.7	33941.4	68249.3	49148.2	81910.5	65074.6	130482	116724	195875	81746.6	238786	205025	378905	109332	304737	276945	485422	113281
9	11499.5	40643.1	87578	112847	46642	92303.8	66747.6	118627	89532.7	182895	164165	265309	113187	333546	286424	513747	152094	424830	385616	658579	157494	424830	361341	658579				9	9029.16	32226.7	69620.2	89012.6	36740.5	73271.4	53095.1	93581.8	70744.4	145127	130161	211447	88292.4	264339	227330	410402	116913	336560	304852	526270	121239
10	12818.6	44775.3	97861.3	126641	51103.4	102999	79904.2	134175	98569.5	218664	185528	300234	123620	392235	328519	584836	164177	495284	441859	751214	170177	495284	417584	751214				10	9809.94	34672.6	75706.9	97177.4	39381.2	79601.7	60882.5	102785	76093.3	166298	142806	232119	94467.7	299076	252246	452479	124065	378262	338142	581100	128746
CUMULATIVE COSTS PER M3 OF WATER [USD/m3]																												CUMULATIVE COSTS PER M3 OF WATER [USD/m3]
	USD/m3	USD/m3	USD/m3	USD/m3	USD/m3	USD/m3	USD/m3	USD/m3	USD/m3	USD/m3	USD/m3	USD/m3	USD/m3	USD/m3	USD/m3	USD/m3	USD/m3	USD/m3	USD/m3	USD/m3	USD/m3	USD/m3	USD/m3	USD/m3	USD/m3	USD/m3			USD/m3	USD/m3	USD/m3	USD/m3	USD/m3	USD/m3	USD/m3	USD/m3	USD/m3	USD/m3	USD/m3	USD/m3	USD/m3	USD/m3	USD/m3	USD/m3	USD/m3	USD/m3	USD/m3	USD/m3	USD/m3
	HP	2_S	2_Ds	2_Dl	5_S	5_Ds	5_H	5_Dl	10_S	10_Ds	10_H	10_Dl	25_S	25_Ds	25_H	25_Dl	50_S	50_Ds	50_H	50_Dl	50_S2	50_Ds2	50_H2	50_Dl2	normal_min	normal_max			HP	2_S	2_Ds	2_Dl	5_S	5_Ds	5_H	5_Dl	10_S	10_Ds	10_H	10_Dl	25_S	25_Ds	25_H	25_Dl	50_S	50_Ds	50_H	50_Dl	50_S2
1	0.177209	0.808644	1.50416	1.26623	0.34923	0.626567	0.344697	0.527874	0.35369	0.705098	0.367375	0.566655	0.163334	0.517089	0.254377	0.458451	0.0945829	0.330845	0.164489	0.297285	0.0992796	0.330845	0.164489	0.297285	0.123556	0.834		1	0.177209	0.808644	1.50416	1.26623	0.34923	0.626567	0.344697	0.527874	0.35369	0.705098	0.367375	0.566655	0.163334	0.517089	0.254377	0.458451	0.0945829	0.330845	0.164489	0.297285	0.0992796
2	0.329538	0.808644	1.75828	1.44411	0.34923	0.731873	0.344697	0.601588	0.35369	0.705098	0.367375	0.627455	0.163334	0.517089	0.254377	0.4936	0.0945829	0.330845	0.164489	0.316592	0.0992796	0.330845	0.164489	0.316592	0.123556	0.834		2	0.325101	0.808644	1.75087	1.43893	0.34923	0.728806	0.344697	0.599441	0.35369	0.705098	0.367375	0.625684	0.163334	0.517089	0.254377	0.492577	0.0945829	0.330845	0.164489	0.31603	0.0992796
3	0.432898	0.808644	1.67357	1.50341	0.34923	0.696771	0.344697	0.62616	0.35369	0.774584	0.367375	0.607188	0.163334	0.55726	0.254377	0.481884	0.0945829	0.35291	0.164489	0.310157	0.0992796	0.35291	0.164489	0.310157	0.123556	0.834		3	0.423894	0.808644	1.67338	1.49643	0.34923	0.696692	0.344697	0.62327	0.35369	0.770576	0.367375	0.607142	0.163334	0.554944	0.254377	0.481857	0.0945829	0.351637	0.164489	0.310142	0.0992796
4	0.44514	0.808644	1.75828	1.44411	0.34923	0.731873	0.344697	0.601588	0.35369	0.757212	0.367375	0.627455	0.163334	0.547218	0.254377	0.4936	0.0945829	0.347394	0.164489	0.316592	0.0992796	0.347394	0.164489	0.316592	0.123556	0.834		4	0.437146	0.808644	1.75087	1.44381	0.34923	0.728806	0.344697	0.601463	0.35369	0.755608	0.367375	0.625684	0.163334	0.546291	0.254377	0.492577	0.0945829	0.346884	0.164489	0.31603	0.0992796
5	0.391554	0.808644	1.70745	1.69924	0.34923	0.710812	0.419939	0.720463	0.35369	0.746789	0.415768	0.637121	0.163334	0.541192	0.294447	0.510664	0.0945829	0.344084	0.190678	0.330148	0.0992796	0.344084	0.190678	0.330148	0.123556	0.834		5	0.391034	0.808644	1.70711	1.67015	0.34923	0.710669	0.411435	0.706925	0.35369	0.746648	0.410298	0.634572	0.163334	0.54111	0.289918	0.507893	0.0945829	0.344039	0.187718	0.328154	0.0992796
6	0.483674	0.808644	1.95592	1.68636	0.34923	0.813778	0.407399	0.712936	0.35369	0.774584	0.407702	0.692932	0.163334	0.55726	0.287769	0.541017	0.0945829	0.35291	0.186313	0.346124	0.0992796	0.35291	0.186313	0.346124	0.123556	0.834		6	0.470348	0.808644	1.92089	1.66325	0.34923	0.799259	0.401868	0.702392	0.35369	0.770576	0.404145	0.682944	0.163334	0.554944	0.284823	0.534399	0.0945829	0.351637	0.184388	0.342181	0.0992796
7	0.439893	0.905193	1.946	1.67717	0.421797	0.823086	0.424001	0.70756	0.372822	0.764657	0.413101	0.686053	0.176976	0.551522	0.290956	0.529222	0.121729	0.349758	0.19903	0.339147	0.126425	0.349758	0.183195	0.339147	0.123556	0.834		7	0.435425	0.889161	1.91678	1.65834	0.409747	0.808751	0.416372	0.699164	0.369645	0.762775	0.409071	0.678397	0.174711	0.550434	0.287832	0.525351	0.117221	0.34916	0.195222	0.336833	0.121918
8	0.44514	0.893124	1.9543	1.6258	0.412726	0.824848	0.414088	0.685099	0.393816	0.780597	0.407386	0.686328	0.201085	0.573032	0.286384	0.529163	0.136997	0.366055	0.194712	0.338741	0.141694	0.366055	0.180857	0.338741	0.123556	0.834		8	0.440117	0.881026	1.92644	1.61872	0.403632	0.811623	0.40913	0.681858	0.386935	0.77585	0.404858	0.679393	0.194427	0.56793	0.284452	0.525695	0.130018	0.362394	0.192117	0.336738	0.134714
9	0.466748	0.883738	1.90428	1.71761	0.405671	0.802817	0.406378	0.722233	0.389357	0.79537	0.416451	0.673031	0.196891	0.580207	0.290638	0.521306	0.132284	0.369498	0.195645	0.334135	0.136981	0.369498	0.183329	0.334135	0.123556	0.834		9	0.457478	0.874727	1.8897	1.69124	0.398898	0.795519	0.403523	0.711223	0.384042	0.787833	0.412178	0.669583	0.191721	0.573993	0.287952	0.519843	0.126934	0.365409	0.193073	0.333305	0.131631
10	0.46826	0.876228	1.91509	1.73481	0.400027	0.806253	0.437831	0.735206	0.38579	0.855828	0.42358	0.685466	0.193535	0.614066	0.300018	0.534097	0.128514	0.387698	0.201762	0.34302	0.133211	0.387698	0.190678	0.34302	0.123556	0.834		10	0.459328	0.869713	1.899	1.70629	0.39513	0.79868	0.427603	0.721901	0.381739	0.834273	0.417911	0.679279	0.189567	0.600153	0.295272	0.529658	0.12448	0.379527	0.19791	0.340109	0.129176
		Solar		Hybrid		Diesel short		Diesel long
1		0.808644	0.0945829	0.367375	0.164489	1.50416	0.330845	1.26623	0.297285
2		0.808644	0.0945829	0.367375	0.164489	1.75828	0.330845	1.44411	0.316592
3		0.808644	0.0945829	0.367375	0.164489	1.67357	0.35291	1.50341	0.310157
4		0.808644	0.0945829	0.367375	0.164489	1.75828	0.347394	1.44411	0.316592
5		0.808644	0.0945829	0.419939	0.190678	1.70745	0.344084	1.69924	0.330148
6		0.808644	0.0945829	0.407702	0.186313	1.95592	0.35291	1.68636	0.346124
7		0.905193	0.121729	0.424001	0.183195	1.946	0.349758	1.67717	0.339147
8		0.893124	0.136997	0.414088	0.180857	1.9543	0.366055	1.6258	0.338741
9		0.883738	0.132284	0.416451	0.183329	1.90428	0.369498	1.71761	0.334135
10		0.876228	0.128514	0.437831	0.190678	1.91509	0.387698	1.73481	0.34302
																											0.102963
[truncated: 32 more columns]

## Sheet: O&M_UGX
	HP	2_S	2_Ds	2_Dl	5_S	5_Ds	5_H	5_Dl	10_S	10_Ds	10_H	10_Dl	25_S	25_Ds	25_H	25_Dl	50_S	50_Ds	50_H	50_Dl	50_S2	50_Ds2	50_H2	50_Dl2					UGX to USD
m3/day	7.5	14	14	20	35	35	50	50	70	70	120	120	175	175	300	300	350	350	600	600	350	350	600	600
m3 / year	2737.5	5110	5110	7300	12775	12775	18250	18250	25550	25550	43800	43800	63875	63875	109500	109500	127750	127750	219000	219000	127750	127750	219000	219000					0.000278
Yearly O&M O&M	1745000	1.48639e+07	2.76483e+07	3.32499e+07	1.60482e+07	2.87928e+07	2.26285e+07	3.46536e+07	3.25064e+07	6.48031e+07	5.78814e+07	8.92788e+07	3.75287e+07	1.1881e+08	1.00195e+08	1.80577e+08	4.34639e+07	1.52034e+08	1.29579e+08	2.34192e+08	4.56222e+07	1.52034e+08	1.29579e+08	2.34192e+08
DISCOUNT RATE	0																											DISCOUNT RATE	0.06
YEARLY COSTS [UGX/YEAR]																												YEARLY COSTS [UGX/YEAR]
	UGX/y	UGX/y	UGX/y	UGX/y	UGX/y	UGX/y	UGX/y	UGX/y	UGX/y	UGX/y	UGX/y	UGX/y	UGX/y	UGX/y	UGX/y	UGX/y	UGX/y	UGX/y	UGX/y	UGX/y	UGX/y	UGX/y	UGX/y	UGX/y					UGX/y	UGX/y	UGX/y	UGX/y	UGX/y	UGX/y	UGX/y	UGX/y	UGX/y	UGX/y	UGX/y	UGX/y	UGX/y	UGX/y	UGX/y	UGX/y	UGX/y	UGX/y	UGX/y	UGX/y	UGX/y
	HP	2_S	2_Ds	2_Dl	5_S	5_Ds	5_H	5_Dl	10_S	10_Ds	10_H	10_Dl	25_S	25_Ds	25_H	25_Dl	50_S	50_Ds	50_H	50_Dl	50_S2	50_Ds2	50_H2	50_Dl2					HP	2_S	2_Ds	2_Dl	5_S	5_Ds	5_H	5_Dl	10_S	10_Ds	10_H	10_Dl	25_S	25_Ds	25_H	25_Dl	50_S	50_Ds	50_H	50_Dl	50_S2
1	1745000	1.48639e+07	2.76483e+07	3.32499e+07	1.60482e+07	2.87928e+07	2.26285e+07	3.46536e+07	3.25064e+07	6.48031e+07	5.78814e+07	8.92788e+07	3.75287e+07	1.1881e+08	1.00195e+08	1.80577e+08	4.34639e+07	1.52034e+08	1.29579e+08	2.34192e+08	4.56222e+07	1.52034e+08	1.29579e+08	2.34192e+08				1	1745000	1.48639e+07	2.76483e+07	3.32499e+07	1.60482e+07	2.87928e+07	2.26285e+07	3.46536e+07	3.25064e+07	6.48031e+07	5.78814e+07	8.92788e+07	3.75287e+07	1.1881e+08	1.00195e+08	1.80577e+08	4.34639e+07	1.52034e+08	1.29579e+08	2.34192e+08	4.56222e+07
2	4745000	1.48639e+07	3.69904e+07	4.2592e+07	1.60482e+07	3.84711e+07	2.26285e+07	4.43319e+07	3.25064e+07	6.48031e+07	5.78814e+07	1.08437e+08	3.75287e+07	1.1881e+08	1.00195e+08	2.08267e+08	4.34639e+07	1.52034e+08	1.29579e+08	2.64611e+08	4.56222e+07	1.52034e+08	1.29579e+08	2.64611e+08				2	4.47642e+06	1.40226e+07	3.48966e+07	4.01811e+07	1.51398e+07	3.62935e+07	2.13476e+07	4.18226e+07	3.06664e+07	6.1135e+07	5.46051e+07	1.02299e+08	3.54044e+07	1.12085e+08	9.45237e+07	1.96478e+08	4.10037e+07	1.43428e+08	1.22245e+08	2.49633e+08	4.30398e+07
3	6.29838e+06	1.48639e+07	2.76483e+07	4.2592e+07	1.60482e+07	2.87928e+07	2.26285e+07	4.43319e+07	3.25064e+07	8.39616e+07	5.78814e+07	8.92788e+07	3.75287e+07	1.465e+08	1.00195e+08	1.80577e+08	4.34639e+07	1.82453e+08	1.29579e+08	2.34192e+08	4.56222e+07	1.82453e+08	1.29579e+08	2.34192e+08				3	5.60554e+06	1.32288e+07	2.46069e+07	3.79067e+07	1.42829e+07	2.56255e+07	2.01393e+07	3.94553e+07	2.89306e+07	7.47255e+07	5.15142e+07	7.94578e+07	3.34004e+07	1.30384e+08	8.91733e+07	1.60713e+08	3.86827e+07	1.62383e+08	1.15325e+08	2.0843e+08	4.06036e+07
4	4745000	1.48639e+07	3.69904e+07	3.32499e+07	1.60482e+07	3.84711e+07	2.26285e+07	3.46536e+07	3.25064e+07	6.48031e+07	5.78814e+07	1.08437e+08	3.75287e+07	1.1881e+08	1.00195e+08	2.08267e+08	4.34639e+07	1.52034e+08	1.29579e+08	2.64611e+08	4.56222e+07	1.52034e+08	1.29579e+08	2.64611e+08				4	3.98399e+06	1.248e+07	3.10579e+07	2.79173e+07	1.34744e+07	3.23011e+07	1.89993e+07	2.90958e+07	2.7293e+07	5.44099e+07	4.85983e+07	9.1046e+07	3.15098e+07	9.97549e+07	8.41257e+07	1.74865e+08	3.64932e+07	1.2765e+08	1.08797e+08	2.22173e+08	3.83053e+07
5	1745000	1.48639e+07	2.76483e+07	7.14173e+07	1.60482e+07	2.87928e+07	4.73259e+07	7.85118e+07	3.25064e+07	6.48031e+07	9.60036e+07	1.06473e+08	3.75287e+07	1.1881e+08	1.79111e+08	2.28027e+08	4.34639e+07	1.52034e+08	2.32734e+08	3.02797e+08	4.56222e+07	1.52034e+08	2.32734e+08	3.02797e+08				5	1.3822e+06	1.17736e+07	2.19001e+07	5.65692e+07	1.27117e+07	2.28066e+07	3.74865e+07	6.21887e+07	2.57481e+07	5.13301e+07	7.60439e+07	8.43362e+07	2.97262e+07	9.41084e+07	1.41873e+08	1.80619e+08	3.44275e+07	1.20425e+08	1.84347e+08	2.39844e+08	3.61371e+07
6	9.29838e+06	1.48639e+07	5.87885e+07	4.2592e+07	1.60482e+07	6.1054e+07	2.26285e+07	4.43319e+07	3.25064e+07	8.39616e+07	5.78814e+07	1.5314e+08	3.75287e+07	1.465e+08	1.00195e+08	2.72876e+08	4.34639e+07	1.82453e+08	1.29579e+08	3.3559e+08	4.56222e+07	1.82453e+08	1.29579e+08	3.3559e+08				6	6.94829e+06	1.11072e+07	4.39302e+07	3.18272e+07	1.19922e+07	4.56231e+07	1.69093e+07	3.31274e+07	2.42907e+07	6.2741e+07	4.32523e+07	1.14435e+08	2.80436e+07	1.09473e+08	7.48716e+07	2.03909e+08	3.24788e+07	1.36339e+08	9.68291e+07	2.50772e+08	3.40916e+07
7	1745000	2.72868e+07	3.46755e+07	4.2592e+07	3.9391e+07	4.03898e+07	3.43742e+07	4.43319e+07	4.4815e+07	6.48031e+07	7.01899e+07	1.01587e+08	5.94696e+07	1.1881e+08	1.22136e+08	1.80577e+08	1.30784e+08	1.52034e+08	2.16899e+08	2.34192e+08	1.32942e+08	1.52034e+08	1.29579e+08	2.34192e+08				7	1.23016e+06	1.92361e+07	2.44449e+07	3.00257e+07	2.77691e+07	2.84732e+07	2.42324e+07	3.12523e+07	3.15928e+07	4.56836e+07	4.94811e+07	7.16151e+07	4.19237e+07	8.37561e+07	8.61011e+07	1.273e+08	9.21975e+07	1.07178e+08	1.52905e+08	1.65096e+08	9.3719e+07
8	4745000	1.48639e+07	3.69904e+07	3.32499e+07	1.60482e+07	3.84711e+07	2.26285e+07	3.46536e+07	4.97002e+07	8.19969e+07	5.78814e+07	1.08437e+08	8.49788e+07	1.6626e+08	1.00195e+08	2.08267e+08	1.12069e+08	2.20639e+08	1.29579e+08	2.64611e+08	1.14227e+08	2.20639e+08	1.29579e+08	2.64611e+08				8	3.1557e+06	9.88536e+06	2.46007e+07	2.21131e+07	1.0673e+07	2.55855e+07	1.50492e+07	2.30466e+07	3.30535e+07	5.45326e+07	3.84944e+07	7.2117e+07	5.65158e+07	1.10572e+08	6.66355e+07	1.38509e+08	7.45324e+07	1.46738e+08	8.61776e+07	1.75982e+08	7.59677e+07
9	6.29838e+06	1.48639e+07	2.76483e+07	6.43901e+07	1.60482e+07	2.87928e+07	2.26285e+07	6.69148e+07	3.25064e+07	8.39616e+07	7.70398e+07	8.92788e+07	3.75287e+07	1.465e+08	1.27885e+08	1.80577e+08	4.34639e+07	1.82453e+08	1.59998e+08	2.34192e+08	4.56222e+07	1.82453e+08	1.59998e+08	2.34192e+08				9	3.95168e+06	9.32581e+06	1.73469e+07	4.03992e+07	1.00689e+07	1.80649e+07	1.41974e+07	4.19832e+07	2.03949e+07	5.26785e+07	4.83358e+07	5.60146e+07	2.3546e+07	9.19156e+07	8.02366e+07	1.13296e+08	2.72698e+07	1.14473e+08	1.00385e+08	1.46935e+08	2.86239e+07
10	4745000	1.48639e+07	3.69904e+07	4.96191e+07	1.60482e+07	3.84711e+07	4.73259e+07	5.5929e+07	3.25064e+07	1.28665e+08	7.68451e+07	1.25631e+08	3.75287e+07	2.11109e+08	1.51421e+08	2.55717e+08	4.34639e+07	2.53431e+08	2.02314e+08	3.33217e+08	4.56222e+07	2.53431e+08	2.02314e+08	3.33217e+08				10	2.80856e+06	8.79794e+06	2.18946e+07	2.93695e+07	9.49893e+06	2.2771e+07	2.80121e+07	3.31043e+07	1.92405e+07	7.61564e+07	4.54845e+07	7.43608e+07	2.22132e+07	1.24955e+08	8.9626e+07	1.51358e+08	2.57262e+07	1.50006e+08	1.1975e+08	1.9723e+08	2.70037e+07
YEARLY WATER PRODUCTION [m3/year]																												YEARLY WATER PRODUCTION [m3/year]
	m3/y	m3/y	m3/y	m3/y	m3/y	m3/y	m3/y	m3/y	m3/y	m3/y	m3/y	m3/y	m3/y	m3/y	m3/y	m3/y	m3/y	m3/y	m3/y	m3/y	m3/y	m3/y	m3/y	m3/y					m3/y	m3/y	m3/y	m3/y	m3/y	m3/y	m3/y	m3/y	m3/y	m3/y	m3/y	m3/y	m3/y	m3/y	m3/y	m3/y	m3/y	m3/y	m3/y	m3/y	m3/y
	HP	2_S	2_Ds	2_Dl	5_S	5_Ds	5_H	5_Dl	10_S	10_Ds	10_H	10_Dl	25_S	25_Ds	25_H	25_Dl	50_S	50_Ds	50_H	50_Dl	50_S2	50_Ds2	50_H2	50_Dl2					HP	2_S	2_Ds	2_Dl	5_S	5_Ds	5_H	5_Dl	10_S	10_Ds	10_H	10_Dl	25_S	25_Ds	25_H	25_Dl	50_S	50_Ds	50_H	50_Dl	50_S2
1	2737.5	5110	5110	7300	12775	12775	18250	18250	25550	25550	43800	43800	63875	63875	109500	109500	127750	127750	219000	219000	127750	127750	219000	219000				1	2737.5	5110	5110	7300	12775	12775	18250	18250	25550	25550	43800	43800	63875	63875	109500	109500	127750	127750	219000	219000	127750
2	2737.5	5110	5110	7300	12775	12775	18250	18250	25550	25550	43800	43800	63875	63875	109500	109500	127750	127750	219000	219000	127750	127750	219000	219000				2	2582.55	4820.75	4820.75	6886.79	12051.9	12051.9	17217	17217	24103.8	24103.8	41320.8	41320.8	60259.4	60259.4	103302	103302	120519	120519	206604	206604	120519
3	2737.5	5110	5110	7300	12775	12775	18250	18250	25550	25550	43800	43800	63875	63875	109500	109500	127750	127750	219000	219000	127750	127750	219000	219000				3	2436.37	4547.88	4547.88	6496.97	11369.7	11369.7	16242.4	16242.4	22739.4	22739.4	38981.8	38981.8	56848.5	56848.5	97454.6	97454.6	113697	113697	194909	194909	113697
4	2737.5	5110	5110	7300	12775	12775	18250	18250	25550	25550	43800	43800	63875	63875	109500	109500	127750	127750	219000	219000	127750	127750	219000	219000				4	2298.46	4290.45	4290.45	6129.22	10726.1	10726.1	15323.1	15323.1	21452.3	21452.3	36775.3	36775.3	53630.7	53630.7	91938.3	91938.3	107261	107261	183877	183877	107261
5	2737.5	5110	5110	7300	12775	12775	18250	18250	25550	25550	43800	43800	63875	63875	109500	109500	127750	127750	219000	219000	127750	127750	219000	219000				5	2168.36	4047.6	4047.6	5782.28	10119	10119	14455.7	14455.7	20238	20238	34693.7	34693.7	50595	50595	86734.3	86734.3	101190	101190	173469	173469	101190
6	2737.5	5110	5110	7300	12775	12775	18250	18250	25550	25550	43800	43800	63875	63875	109500	109500	127750	127750	219000	219000	127750	127750	219000	219000				6	2045.62	3818.49	3818.49	5454.98	9546.22	9546.22	13637.5	13637.5	19092.4	19092.4	32729.9	32729.9	47731.1	47731.1	81824.8	81824.8	95462.2	95462.2	163650	163650	95462.2
7	2737.5	5110	5110	7300	12775	12775	18250	18250	25550	25550	43800	43800	63875	63875	109500	109500	127750	127750	219000	219000	127750	127750	219000	219000				7	1929.83	3602.35	3602.35	5146.21	9005.87	9005.87	12865.5	12865.5	18011.7	18011.7	30877.3	30877.3	45029.4	45029.4	77193.2	77193.2	90058.7	90058.7	154386	154386	90058.7
8	2737.5	5110	5110	7300	12775	12775	18250	18250	25550	25550	43800	43800	63875	63875	109500	109500	127750	127750	219000	219000	127750	127750	219000	219000				8	1820.59	3398.44	3398.44	4854.92	8496.1	8496.1	12137.3	12137.3	16992.2	16992.2	29129.5	29129.5	42480.5	42480.5	72823.8	72823.8	84961	84961	145648	145648	84961
9	2737.5	5110	5110	7300	12775	12775	18250	18250	25550	25550	43800	43800	63875	63875	109500	109500	127750	127750	219000	219000	127750	127750	219000	219000				9	1717.54	3206.08	3206.08	4580.11	8015.19	8015.19	11450.3	11450.3	16030.4	16030.4	27480.7	27480.7	40076	40076	68701.7	68701.7	80151.9	80151.9	137403	137403	80151.9
10	2737.5	5110	5110	7300	12775	12775	18250	18250	25550	25550	43800	43800	63875	63875	109500	109500	127750	127750	219000	219000	127750	127750	219000	219000				10	1620.32	3024.6	3024.6	4320.86	7561.5	7561.5	10802.1	10802.1	15123	15123	25925.2	25925.2	37807.5	37807.5	64812.9	64812.9	75615	75615	129626	129626	75615
CUMULATIVE WATER PRODUCTION [m3]																												CUMULATIVE WATER PRODUCTION [m3]
	m3	m3	m3	m3	m3	m3	m3	m3	m3	m3	m3	m3	m3	m3	m3	m3	m3	m3	m3	m3	m3	m3	m3	m3					m3	m3	m3	m3	m3	m3	m3	m3	m3	m3	m3	m3	m3	m3	m3	m3	m3	m3	m3	m3	m3
	HP	2_S	2_Ds	2_Dl	5_S	5_Ds	5_H	5_Dl	10_S	10_Ds	10_H	10_Dl	25_S	25_Ds	25_H	25_Dl	50_S	50_Ds	50_H	50_Dl	50_S2	50_Ds2	50_H2	50_Dl2					HP	2_S	2_Ds	2_Dl	5_S	5_Ds	5_H	5_Dl	10_S	10_Ds	10_H	10_Dl	25_S	25_Ds	25_H	25_Dl	50_S	50_Ds	50_H	50_Dl	50_S2
1	2737.5	5110	5110	7300	12775	12775	18250	18250	25550	25550	43800	43800	63875	63875	109500	109500	127750	127750	219000	219000	127750	127750	219000	219000				1	2737.5	5110	5110	7300	12775	12775	18250	18250	25550	25550	43800	43800	63875	63875	109500	109500	127750	127750	219000	219000	127750
2	5475	10220	10220	14600	25550	25550	36500	36500	51100	51100	87600	87600	127750	127750	219000	219000	255500	255500	438000	438000	255500	255500	438000	438000				2	5320.05	9930.75	9930.75	14186.8	24826.9	24826.9	35467	35467	49653.8	49653.8	85120.8	85120.8	124134	124134	212802	212802	248269	248269	425604	425604	248269
3	8212.5	15330	15330	21900	38325	38325	54750	54750	76650	76650	131400	131400	191625	191625	328500	328500	383250	383250	657000	657000	383250	383250	657000	657000				3	7756.41	14478.6	14478.6	20683.8	36196.6	36196.6	51709.4	51709.4	72393.2	72393.2	124103	124103	180983	180983	310256	310256	361966	361966	620513	620513	361966
4	10950	20440	20440	29200	51100	51100	73000	73000	102200	102200	175200	175200	255500	255500	438000	438000	511000	511000	876000	876000	511000	511000	876000	876000				4	10054.9	18769.1	18769.1	26813	46922.7	46922.7	67032.5	67032.5	93845.5	93845.5	160878	160878	234614	234614	402195	402195	469227	469227	804390	804390	469227
5	13687.5	25550	25550	36500	63875	63875	91250	91250	127750	127750	219000	219000	319375	319375	547500	547500	638750	638750	1095000	1095000	638750	638750	1095000	1095000				5	12223.2	22816.7	22816.7	32595.3	57041.7	57041.7	81488.2	81488.2	114083	114083	195572	195572	285209	285209	488929	488929	570417	570417	977858	977858	570417
6	16425	30660	30660	43800	76650	76650	109500	109500	153300	153300	262800	262800	383250	383250	657000	657000	766500	766500	1314000	1314000	766500	766500	1314000	1314000				6	14268.8	26635.2	26635.2	38050.3	66587.9	66587.9	95125.6	95125.6	133176	133176	228302	228302	332940	332940	570754	570754	665879	665879	1.14151e+06	1.14151e+06	665879
7	19162.5	35770	35770	51100	89425	89425	127750	127750	178850	178850	306600	306600	447125	447125	766500	766500	894250	894250	1533000	1533000	894250	894250	1533000	1533000				7	16198.7	30237.5	30237.5	43196.5	75593.8	75593.8	107991	107991	151188	151188	259179	259179	377969	377969	647947	647947	755938	755938	1.29589e+06	1.29589e+06	755938
8	21900	40880	40880	58400	102200	102200	146000	146000	204400	204400	350400	350400	511000	511000	876000	876000	1022000	1022000	1752000	1752000	1022000	1022000	1752000	1752000				8	18019.3	33636	33636	48051.4	84089.9	84089.9	120128	120128	168180	168180	288308	288308	420450	420450	720771	720771	840899	840899	1.44154e+06	1.44154e+06	840899
9	24637.5	45990	45990	65700	114975	114975	164250	164250	229950	229950	394200	394200	574875	574875	985500	985500	1149750	1149750	1971000	1971000	1149750	1149750	1971000	1971000				9	19736.8	36842	36842	52631.5	92105.1	92105.1	131579	131579	184210	184210	315789	315789	460526	460526	789472	789472	921051	921051	1.57894e+06	1.57894e+06	921051
10	27375	51100	51100	73000	127750	127750	182500	182500	255500	255500	438000	438000	638750	638750	1095000	1095000	1277500	1277500	2190000	2190000	1277500	1277500	2190000	2190000				10	21357.1	39866.6	39866.6	56952.4	99666.6	99666.6	142381	142381	199333	199333	341714	341714	498333	498333	854285	854285	996666	996666	1.70857e+06	1.70857e+06	996666
CUMULATIVE COSTS [UGX]																												CUMULATIVE COSTS [UGX]
	UGX	UGX	UGX	UGX	UGX	UGX	UGX	UGX	UGX	UGX	UGX	UGX	UGX	UGX	UGX	UGX	UGX	UGX	UGX	UGX	UGX	UGX	UGX	UGX					UGX	UGX	UGX	UGX	UGX	UGX	UGX	UGX	UGX	UGX	UGX	UGX	UGX	UGX	UGX	UGX	UGX	UGX	UGX	UGX	UGX
	HP	2_S	2_Ds	2_Dl	5_S	5_Ds	5_H	5_Dl	10_S	10_Ds	10_H	10_Dl	25_S	25_Ds	25_H	25_Dl	50_S	50_Ds	50_H	50_Dl	50_S2	50_Ds2	50_H2	50_Dl2					HP	2_S	2_Ds	2_Dl	5_S	5_Ds	5_H	5_Dl	10_S	10_Ds	10_H	10_Dl	25_S	25_Ds	25_H	25_Dl	50_S	50_Ds	50_H	50_Dl	50_S2
1	1745000	1.48639e+07	2.76483e+07	3.32499e+07	1.60482e+07	2.87928e+07	2.26285e+07	3.46536e+07	3.25064e+07	6.48031e+07	5.78814e+07	8.92788e+07	3.75287e+07	1.1881e+08	1.00195e+08	1.80577e+08	4.34639e+07	1.52034e+08	1.29579e+08	2.34192e+08	4.56222e+07	1.52034e+08	1.29579e+08	2.34192e+08				1	1745000	1.48639e+07	2.76483e+07	3.32499e+07	1.60482e+07	2.87928e+07	2.26285e+07	3.46536e+07	3.25064e+07	6.48031e+07	5.78814e+07	8.92788e+07	3.75287e+07	1.1881e+08	1.00195e+08	1.80577e+08	4.34639e+07	1.52034e+08	1.29579e+08	2.34192e+08	4.56222e+07
2	6490000	2.97279e+07	6.46387e+07	7.58419e+07	3.20965e+07	6.72639e+07	4.52569e+07	7.89855e+07	6.50128e+07	1.29606e+08	1.15763e+08	1.97716e+08	7.50573e+07	2.37619e+08	2.0039e+08	3.88843e+08	8.69279e+07	3.04068e+08	2.59158e+08	4.98804e+08	9.12444e+07	3.04068e+08	2.59158e+08	4.98804e+08				2	6.22142e+06	2.88865e+07	6.2545e+07	7.3431e+07	3.11881e+07	6.50863e+07	4.39761e+07	7.64761e+07	6.31728e+07	1.25938e+08	1.12486e+08	1.91578e+08	7.29331e+07	2.30894e+08	1.94719e+08	3.77055e+08	8.44676e+07	2.95462e+08	2.51824e+08	4.83826e+08	8.8662e+07
3	12788384	4.45918e+07	9.22871e+07	1.18434e+08	4.81447e+07	9.60567e+07	6.78854e+07	1.23317e+08	9.75192e+07	2.13568e+08	1.73644e+08	2.86995e+08	1.12586e+08	3.84119e+08	3.00585e+08	5.6942e+08	1.30392e+08	4.86521e+08	3.88738e+08	7.32996e+08	1.36867e+08	4.86521e+08	3.88738e+08	7.32996e+08				3	1.1827e+07	4.21153e+07	8.71519e+07	1.11338e+08	4.5471e+07	9.07117e+07	6.41153e+07	1.15931e+08	9.21034e+07	2.00664e+08	1.64001e+08	2.71036e+08	1.06333e+08	3.61278e+08	2.83892e+08	5.37767e+08	1.2315e+08	4.57844e+08	3.67149e+08	6.92256e+08	1.29266e+08
4	17533384	5.94557e+07	1.29277e+08	1.51684e+08	6.4193e+07	1.34528e+08	9.05139e+07	1.57971e+08	1.30026e+08	2.78371e+08	2.31525e+08	3.95432e+08	1.50115e+08	5.02929e+08	4.0078e+08	7.77687e+08	1.73856e+08	6.38554e+08	5.18317e+08	9.97607e+08	1.82489e+08	6.38554e+08	5.18317e+08	9.97607e+08				4	1.58109e+07	5.45954e+07	1.1821e+08	1.39255e+08	5.89454e+07	1.23013e+08	8.31146e+07	1.45027e+08	1.19396e+08	2.55073e+08	2.12599e+08	3.62082e+08	1.37843e+08	4.61033e+08	3.68018e+08	7.12632e+08	1.59644e+08	5.85495e+08	4.75946e+08	9.14429e+08	1.67571e+08
5	19278384	7.43196e+07	1.56926e+08	2.23101e+08	8.02412e+07	1.63321e+08	1.3784e+08	2.36483e+08	1.62532e+08	3.43174e+08	3.27529e+08	5.01905e+08	1.87643e+08	6.21738e+08	5.79891e+08	1.00571e+09	2.1732e+08	7.90588e+08	7.51051e+08	1.3004e+09	2.28111e+08	7.90588e+08	7.51051e+08	1.3004e+09				5	1.71932e+07	6.6369e+07	1.4011e+08	1.95824e+08	7.16571e+07	1.45819e+08	1.20601e+08	2.07216e+08	1.45145e+08	3.06404e+08	2.88643e+08	4.46418e+08	1.67569e+08	5.55142e+08	5.09891e+08	8.93251e+08	1.94071e+08	7.0592e+08	6.60293e+08	1.15427e+09	2.03708e+08
6	28576768	8.91836e+07	2.15714e+08	2.65693e+08	9.62894e+07	2.24375e+08	1.60468e+08	2.80815e+08	1.95038e+08	4.27135e+08	3.8541e+08	6.55045e+08	2.25172e+08	7.68238e+08	6.80087e+08	1.27859e+09	2.60784e+08	9.73041e+08	8.8063e+08	1.63599e+09	2.73733e+08	9.73041e+08	8.8063e+08	1.63599e+09				6	2.41414e+07	7.74762e+07	1.8404e+08	2.27651e+08	8.36493e+07	1.91442e+08	1.3751e+08	2.40343e+08	1.69435e+08	3.69145e+08	3.31895e+08	5.60853e+08	1.95613e+08	6.64615e+08	5.84762e+08	1.09716e+09	2.2655e+08	8.42259e+08	7.57122e+08	1.40504e+09	2.378e+08
7	30321768	1.1647e+08	2.5039e+08	3.08285e+08	1.3568e+08	2.64764e+08	1.94842e+08	3.25147e+08	2.39853e+08	4.91939e+08	4.556e+08	7.56632e+08	2.84642e+08	8.87047e+08	8.02223e+08	1.45917e+09	3.91567e+08	1.12507e+09	1.09753e+09	1.87019e+09	4.06675e+08	1.12507e+09	1.01021e+09	1.87019e+09				7	2.53716e+07	9.67123e+07	2.08485e+08	2.57677e+08	1.11418e+08	2.19916e+08	1.61743e+08	2.71596e+08	2.01028e+08	4.14828e+08	3.81376e+08	6.32469e+08	2.37537e+08	7.48371e+08	6.70863e+08	1.22446e+09	3.18747e+08	9.49437e+08	9.10027e+08	1.57014e+09	3.31519e+08
8	35066768	1.31334e+08	2.8738e+08	3.41535e+08	1.51729e+08	3.03235e+08	2.17471e+08	3.598e+08	2.89554e+08	5.73935e+08	5.13482e+08	8.65069e+08	3.6962e+08	1.05331e+09	9.02418e+08	1.66743e+09	5.03637e+08	1.34571e+09	1.22711e+09	2.1348e+09	5.20903e+08	1.34571e+09	1.13979e+09	2.1348e+09				8	2.85273e+07	1.06598e+08	2.33086e+08	2.7979e+08	1.22091e+08	2.45501e+08	1.76792e+08	2.94642e+08	2.34081e+08	4.69361e+08	4.19871e+08	7.04585e+08	2.94053e+08	8.58943e+08	7.37499e+08	1.36297e+09	3.9328e+08	1.09617e+09	9.96205e+08	1.74612e+09	4.07486e+08
9	41365152	1.46198e+08	3.15029e+08	4.05925e+08	1.67777e+08	3.32028e+08	2.40099e+08	4.26715e+08	3.2206e+08	6.57897e+08	5.90522e+08	9.54348e+08	4.07149e+08	1.19981e+09	1.0303e+09	1.84801e+09	5.47101e+08	1.52817e+09	1.38711e+09	2.36899e+09	5.66525e+08	1.52817e+09	1.29979e+09	2.36899e+09				9	3.2479e+07	1.15923e+08	2.50433e+08	3.20189e+08	1.3216e+08	2.63566e+08	1.9099e+08	3.36625e+08	2.54476e+08	5.22039e+08	4.68206e+08	7.606e+08	3.17599e+08	9.50859e+08	8.17735e+08	1.47626e+09	4.20549e+08	1.21065e+09	1.09659e+09	1.89306e+09	4.3611e+08
10	46110152	1.61062e+08	3.52019e+08	4.55544e+08	1.83825e+08	3.70499e+08	2.87425e+08	4.82644e+08	3.54566e+08	7.86562e+08	6.67367e+08	1.07998e+09	4.44678e+08	1.41092e+09	1.18172e+09	2.10373e+09	5.90564e+08	1.7816e+09	1.58942e+09	2.70221e+09	6.12147e+08	1.7816e+09	1.5021e+09	2.70221e+09				10	3.52875e+07	1.24721e+08	2.72327e+08	3.49559e+08	1.41659e+08	2.86337e+08	2.19002e+08	3.6973e+08	2.73717e+08	5.98196e+08	5.13691e+08	8.34961e+08	3.39812e+08	1.07581e+09	9.07361e+08	1.62762e+09	4.46276e+08	1.36065e+09	1.21634e+09	2.09029e+09	4.63114e+08
CUMULATIVE COSTS PER WATER UNIT [UGX/m3]																												CUMULATIVE COSTS PER WATER UNIT [UGX/m3]
	UGX/m3	UGX/m3	UGX/m3	UGX/m3	UGX/m3	UGX/m3	UGX/m3	UGX/m3	UGX/m3	UGX/m3	UGX/m3	UGX/m3	UGX/m3	UGX/m3	UGX/m3	UGX/m3	UGX/m3	UGX/m3	UGX/m3	UGX/m3	UGX/m3	UGX/m3	UGX/m3	UGX/m3	UGX/m3	UGX/m3			UGX/m3	UGX/m3	UGX/m3	UGX/m3	UGX/m3	UGX/m3	UGX/m3	UGX/m3	UGX/m3	UGX/m3	UGX/m3	UGX/m3	UGX/m3	UGX/m3	UGX/m3	UGX/m3	UGX/m3	UGX/m3	UGX/m3	UGX/m3	UGX/m3
	HP	2_S	2_Ds	2_Dl	5_S	5_Ds	5_H	5_Dl	10_S	10_Ds	10_H	10_Dl	25_S	25_Ds	25_H	25_Dl	50_S	50_Ds	50_H	50_Dl	50_S2	50_Ds2	50_H2	50_Dl2	normal_min	normal_max			HP	2_S	2_Ds	2_Dl	5_S	5_Ds	5_H	5_Dl	10_S	10_Ds	10_H	10_Dl	25_S	25_Ds	25_H	25_Dl	50_S	50_Ds	50_H	50_Dl	50_S2
1	637.443	2908.79	5410.63	4554.78	1256.22	2253.84	1239.92	1898.83	1272.27	2536.32	1321.49	2038.33	587.533	1860.03	915.024	1649.1	340.226	1190.09	591.686	1069.37	357.121	1190.09	591.686	1069.37	444.444	3000		1	637.443	2908.79	5410.63	4554.78	1256.22	2253.84	1239.92	1898.83	1272.27	2536.32	1321.49	2038.33	587.533	1860.03	915.024	1649.1	340.226	1190.09	591.686	1069.37	357.121
2	1185.39	2908.79	6324.73	5194.65	1256.22	2632.64	1239.92	2163.99	1272.27	2536.32	1321.49	2257.03	587.533	1860.03	915.024	1775.54	340.226	1190.09	591.686	1138.82	357.121	1190.09	591.686	1138.82	444.444	3000		2	1169.43	2908.79	6298.11	5176.01	1256.22	2621.6	1239.92	2156.26	1272.27	2536.32	1321.49	2250.66	587.533	1860.03	915.024	1771.86	340.226	1190.09	591.686	1136.8	357.121
3	1557.19	2908.79	6020.03	5407.94	1256.22	2506.37	1239.92	2252.37	1272.27	2786.27	1321.49	2184.13	587.533	2004.53	915.024	1733.39	340.226	1269.46	591.686	1115.67	357.121	1269.46	591.686	1115.67	444.444	3000		3	1524.8	2908.79	6019.34	5382.86	1256.22	2506.09	1239.92	2241.98	1272.27	2771.86	1321.49	2183.97	587.533	1996.2	915.024	1733.3	340.226	1264.88	591.686	1115.62	357.121
4	1601.22	2908.79	6324.73	5194.65	1256.22	2632.64	1239.92	2163.99	1272.27	2723.78	1321.49	2257.03	587.533	1968.41	915.024	1775.54	340.226	1249.62	591.686	1138.82	357.121	1249.62	591.686	1138.82	444.444	3000		4	1572.47	2908.79	6298.11	5193.57	1256.22	2621.6	1239.92	2163.54	1272.27	2718.02	1321.49	2250.66	587.533	1965.07	915.024	1771.86	340.226	1247.79	591.686	1136.8	357.121
5	1408.47	2908.79	6141.91	6112.36	1256.22	2556.88	1510.57	2591.59	1272.27	2686.29	1495.57	2291.8	587.533	1946.73	1059.16	1836.92	340.226	1237.71	685.891	1187.58	357.121	1237.71	685.891	1187.58	444.444	3000		5	1406.6	2908.79	6140.67	6007.75	1256.22	2556.36	1479.98	2542.9	1272.27	2685.78	1475.89	2282.63	587.533	1946.44	1042.87	1826.95	340.226	1237.55	675.244	1180.41	357.121
6	1739.83	2908.79	7035.69	6066.05	1256.22	2927.26	1465.46	2564.52	1272.27	2786.27	1466.55	2492.56	587.533	2004.53	1035.14	1946.1	340.226	1269.46	670.19	1245.05	357.121	1269.46	670.19	1245.05	444.444	3000		6	1691.9	2908.79	6909.66	5982.91	1256.22	2875.03	1445.57	2526.59	1272.27	2771.86	1453.76	2456.63	587.533	1996.2	1024.54	1922.3	340.226	1264.88	663.265	1230.87	357.121
7	1582.35	3256.09	7000	6032.98	1517.25	2960.74	1525.19	2545.18	1341.09	2750.56	1485.98	2467.82	636.604	1983.89	1046.6	1903.68	437.873	1258.12	715.935	1219.95	454.767	1258.12	658.975	1219.95	444.444	3000		7	1566.28	3198.42	6894.91	5965.24	1473.91	2909.18	1497.74	2514.98	1329.66	2743.8	1471.48	2440.28	628.456	1979.98	1035.37	1889.75	421.658	1255.97	702.239	1211.63	438.552
8	1601.22	3212.68	7029.85	5848.2	1484.62	2967.08	1489.53	2464.39	1416.6	2807.9	1465.42	2468.81	723.328	2061.27	1030.16	1903.46	492.795	1316.75	700.404	1218.49	509.69	1316.75	650.564	1218.49	444.444	3000		8	1583.16	3169.16	6929.65	5822.73	1451.91	2919.51	1471.69	2452.73	1391.85	2790.83	1456.33	2443.86	699.377	2042.92	1023.21	1890.99	467.689	1303.57	691.069	1211.29	484.584
9	1678.95	3178.91	6849.94	6178.46	1459.25	2887.83	1461.79	2597.96	1400.57	2861.04	1498.03	2420.97	708.239	2087.07	1045.46	1875.2	475.843	1329.13	703.758	1201.92	492.738	1329.13	659.455	1201.92	444.444	3000		9	1645.6	3146.5	6797.47	6083.61	1434.88	2861.58	1451.52	2558.36	1381.45	2833.93	1482.66	2408.57	689.644	2064.72	1035.8	1869.94	456.597	1314.42	694.508	1198.94	473.492
10	1684.39	3151.9	6888.83	6240.33	1438.94	2900.19	1574.93	2644.62	1387.74	3078.52	1523.67	2465.71	696.169	2208.87	1079.2	1921.21	462.281	1394.6	725.763	1233.88	479.176	1394.6	685.891	1233.88	444.444	3000		10	1652.26	3128.46	6830.95	6137.74	1421.33	2872.95	1538.14	2596.76	1373.16	3000.98	1503.28	2443.45	681.897	2158.82	1062.13	1905.25	447.768	1365.2	711.905	1223.41	464.663
																											0.102963
[truncated: 32 more columns]

## Sheet: O&M_analysis
	HP	2_S	2_Ds	2_Dl	5_S	5_Ds	5_H	5_Dl	10_S	10_Ds	10_H	10_Dl	25_S	25_Ds	25_H	25_Dl	50_S	50_Ds	50_H	50_Dl	50_S2	50_Ds2	50_H2	50_Dl2					UGX to USD
m3/day	7.5	14	14	20	35	35	50	50	70	70	120	120	175	175	300	300	350	350	600	600	350	350	600	600					0.000278
m3 / year	2737.5	5110	5110	7300	12775	12775	18250	18250	25550	25550	43800	43800	63875	63875	109500	109500	127750	127750	219000	219000	127750	127750	219000	219000
Yearly O&M O&M	485.11	4132.17	7686.24	9243.48	4461.41	8004.39	6290.71	9633.69	9036.78	18015.3	16091	24819.5	10433	33029.1	27854.2	50200.3	12083	42265.4	36023	65105.4	12683	42265.4	36023	65105.4
DISCOUNT RATE	0																											DISCOUNT RATE	0.06
YEARLY COSTS [USD/YEAR]																												YEARLY COSTS [USD/YEAR]
	USD/y	USD/y	USD/y	USD/y	USD/y	USD/y	USD/y	USD/y	USD/y	USD/y	USD/y	USD/y	USD/y	USD/y	USD/y	USD/y	USD/y	USD/y	USD/y	USD/y	USD/y	USD/y	USD/y	USD/y
	HP	2_S	2_Ds	2_Dl	5_S	5_Ds	5_H	5_Dl	10_S	10_Ds	10_H	10_Dl	25_S	25_Ds	25_H	25_Dl	50_S	50_Ds	50_H	50_Dl	50_S2	50_Ds2	50_H2	50_Dl2					HP	2_S	2_Ds	2_Dl	5_S	5_Ds	5_H	5_Dl	10_S	10_Ds	10_H	10_Dl	25_S	25_Ds	25_H	25_Dl	50_S	50_Ds	50_H	50_Dl	50_S2
1	485.11	4132.17	7686.24	9243.48	4461.41	8004.39	6290.71	9633.69	9036.78	18015.3	16091	24819.5	10433	33029.1	27854.2	50200.3	12083	42265.4	36023	65105.4	12683	42265.4	36023	65105.4				1	485.11	4132.17	7686.24	9243.48	4461.41	8004.39	6290.71	9633.69	9036.78	18015.3	16091	24819.5	10433	33029.1	27854.2	50200.3	12083	42265.4	36023	65105.4	12683
2	1319.11	4132.17	10283.3	11840.6	4461.41	10695	6290.71	12324.3	9036.78	18015.3	16091	30145.6	10433	33029.1	27854.2	57898.1	12083	42265.4	36023	73562	12683	42265.4	36023	73562				2	1244.44	3898.28	9701.26	11170.4	4208.88	10089.6	5934.64	11626.7	8525.26	16995.5	15180.2	28439.2	9842.43	31159.5	26277.6	54620.9	11399	39873	33984	69398.1	11965.1
3	1750.95	4132.17	7686.24	11840.6	4461.41	8004.39	6290.71	12324.3	9036.78	23341.3	16091	24819.5	10433	40726.9	27854.2	50200.3	12083	50721.9	36023	65105.4	12683	50721.9	36023	65105.4				3	1558.34	3677.62	6840.73	10538.1	3970.64	7123.88	5598.71	10968.6	8042.7	20773.7	14321	22089.3	9285.31	36246.8	24790.2	44678.1	10753.8	45142.3	32060.4	57943.6	11287.8
4	1319.11	4132.17	10283.3	9243.48	4461.41	10695	6290.71	9633.69	9036.78	18015.3	16091	30145.6	10433	33029.1	27854.2	57898.1	12083	42265.4	36023	73562	12683	42265.4	36023	73562				4	1107.55	3469.45	8634.08	7761	3745.89	8979.71	5281.8	8088.63	7587.46	15126	13510.3	25310.8	8759.72	27731.9	23387	48612.4	10145.1	35486.8	30245.6	61764.1	10648.9
5	485.11	4132.17	7686.24	19854	4461.41	8004.39	13156.6	21826.3	9036.78	18015.3	26689	29599.4	10433	33029.1	49792.9	63391.5	12083	42265.4	64700	84177.7	12683	42265.4	64700	84177.7				5	384.253	3273.07	6088.22	15726.2	3533.85	6340.23	10421.3	17288.5	7157.98	14269.8	21140.2	23445.5	8263.89	26162.1	39440.6	50212	9570.85	33478.1	51248.4	66676.6	10046.1
6	2584.95	4132.17	16343.2	11840.6	4461.41	16973	6290.71	12324.3	9036.78	23341.3	16091	42573	10433	40726.9	27854.2	75859.6	12083	50721.9	36023	93293.9	12683	50721.9	36023	93293.9				6	1931.63	3087.8	12212.6	8847.96	3333.83	12683.2	4700.79	9209.42	6752.81	17442	12024.1	31813	7796.12	30433.5	20814.3	56686.7	9029.1	37902.4	26918.5	69714.6	9477.45
7	485.11	7585.72	9639.79	11840.6	10950.7	11228.4	9556.02	12324.3	12458.6	18015.3	19512.8	28241.3	16532.5	33029.1	33953.8	50200.3	36357.9	42265.4	60298	65105.4	36957.9	42265.4	36023	65105.4				7	341.983	5347.63	6795.67	8347.14	7719.81	7915.55	6736.62	8688.13	8782.8	12700	13755.8	19909	11654.8	23284.2	23936.1	35389.3	25630.9	29795.4	42507.7	45896.8	26053.9
8	1319.11	4132.17	10283.3	9243.48	4461.41	10695	6290.71	9633.69	13816.7	22795.1	16091	30145.6	23624.1	46220.2	27854.2	57898.1	31155.2	61337.6	36023	73562	31755.2	61337.6	36023	73562				8	877.283	2748.13	6839	6147.44	2967.09	7112.77	4183.68	6406.96	9188.86	15160.1	10701.4	20048.5	15711.4	30739.1	18524.7	38505.6	20720	40793	23957.4	48922.9	21119
9	1750.95	4132.17	7686.24	17900.5	4461.41	8004.39	6290.71	18602.3	9036.78	23341.3	21417.1	24819.5	10433	40726.9	35552	50200.3	12083	50721.9	44479.6	65105.4	12683	50721.9	44479.6	65105.4				9	1098.57	2592.58	4822.44	11231	2799.14	5022.05	3946.87	11671.3	5669.79	14644.6	13437.3	15572.1	6545.78	25552.5	22305.8	31496.3	7581.01	31823.6	27907	40848	7957.45
10	1319.11	4132.17	10283.3	13794.1	4461.41	10695	13156.6	15548.3	9036.78	35768.8	21363	34925.4	10433	58688.4	42095.1	71089.3	12083	70453.9	56243.4	92634.2	12683	70453.9	56243.4	92634.2				10	780.779	2445.83	6086.69	8164.72	2640.7	6330.34	7787.37	9202.99	5348.86	21171.5	12644.7	20672.3	6175.26	34737.6	24916	42077.6	7151.89	41701.5	33290.4	54830.1	7507.03
YEARLY WATER PRODUCTION [m3/year]																												YEARLY WATER PRODUCTION [m3/year]
	m3/y	m3/y	m3/y	m3/y	m3/y	m3/y	m3/y	m3/y	m3/y	m3/y	m3/y	m3/y	m3/y	m3/y	m3/y	m3/y	m3/y	m3/y	m3/y	m3/y	m3/y	m3/y	m3/y	m3/y
	HP	2_S	2_Ds	2_Dl	5_S	5_Ds	5_H	5_Dl	10_S	10_Ds	10_H	10_Dl	25_S	25_Ds	25_H	25_Dl	50_S	50_Ds	50_H	50_Dl	50_S2	50_Ds2	50_H2	50_Dl2					HP	2_S	2_Ds	2_Dl	5_S	5_Ds	5_H	5_Dl	10_S	10_Ds	10_H	10_Dl	25_S	25_Ds	25_H	25_Dl	50_S	50_Ds	50_H	50_Dl	50_S2
1	2737.5	5110	5110	7300	12775	12775	18250	18250	25550	25550	43800	43800	63875	63875	109500	109500	127750	127750	219000	219000	127750	127750	219000	219000				1	2737.5	5110	5110	7300	12775	12775	18250	18250	25550	25550	43800	43800	63875	63875	109500	109500	127750	127750	219000	219000	127750
2	2737.5	5110	5110	7300	12775	12775	18250	18250	25550	25550	43800	43800	63875	63875	109500	109500	127750	127750	219000	219000	127750	127750	219000	219000				2	2582.55	4820.75	4820.75	6886.79	12051.9	12051.9	17217	17217	24103.8	24103.8	41320.8	41320.8	60259.4	60259.4	103302	103302	120519	120519	206604	206604	120519
3	2737.5	5110	5110	7300	12775	12775	18250	18250	25550	25550	43800	43800	63875	63875	109500	109500	127750	127750	219000	219000	127750	127750	219000	219000				3	2436.37	4547.88	4547.88	6496.97	11369.7	11369.7	16242.4	16242.4	22739.4	22739.4	38981.8	38981.8	56848.5	56848.5	97454.6	97454.6	113697	113697	194909	194909	113697
4	2737.5	5110	5110	7300	12775	12775	18250	18250	25550	25550	43800	43800	63875	63875	109500	109500	127750	127750	219000	219000	127750	127750	219000	219000				4	2298.46	4290.45	4290.45	6129.22	10726.1	10726.1	15323.1	15323.1	21452.3	21452.3	36775.3	36775.3	53630.7	53630.7	91938.3	91938.3	107261	107261	183877	183877	107261
5	2737.5	5110	5110	7300	12775	12775	18250	18250	25550	25550	43800	43800	63875	63875	109500	109500	127750	127750	219000	219000	127750	127750	219000	219000				5	2168.36	4047.6	4047.6	5782.28	10119	10119	14455.7	14455.7	20238	20238	34693.7	34693.7	50595	50595	86734.3	86734.3	101190	101190	173469	173469	101190
6	2737.5	5110	5110	7300	12775	12775	18250	18250	25550	25550	43800	43800	63875	63875	109500	109500	127750	127750	219000	219000	127750	127750	219000	219000				6	2045.62	3818.49	3818.49	5454.98	9546.22	9546.22	13637.5	13637.5	19092.4	19092.4	32729.9	32729.9	47731.1	47731.1	81824.8	81824.8	95462.2	95462.2	163650	163650	95462.2
7	2737.5	5110	5110	7300	12775	12775	18250	18250	25550	25550	43800	43800	63875	63875	109500	109500	127750	127750	219000	219000	127750	127750	219000	219000				7	1929.83	3602.35	3602.35	5146.21	9005.87	9005.87	12865.5	12865.5	18011.7	18011.7	30877.3	30877.3	45029.4	45029.4	77193.2	77193.2	90058.7	90058.7	154386	154386	90058.7
8	2737.5	5110	5110	7300	12775	12775	18250	18250	25550	25550	43800	43800	63875	63875	109500	109500	127750	127750	219000	219000	127750	127750	219000	219000				8	1820.59	3398.44	3398.44	4854.92	8496.1	8496.1	12137.3	12137.3	16992.2	16992.2	29129.5	29129.5	42480.5	42480.5	72823.8	72823.8	84961	84961	145648	145648	84961
9	2737.5	5110	5110	7300	12775	12775	18250	18250	25550	25550	43800	43800	63875	63875	109500	109500	127750	127750	219000	219000	127750	127750	219000	219000				9	1717.54	3206.08	3206.08	4580.11	8015.19	8015.19	11450.3	11450.3	16030.4	16030.4	27480.7	27480.7	40076	40076	68701.7	68701.7	80151.9	80151.9	137403	137403	80151.9
10	2737.5	5110	5110	7300	12775	12775	18250	18250	25550	25550	43800	43800	63875	63875	109500	109500	127750	127750	219000	219000	127750	127750	219000	219000				10	1620.32	3024.6	3024.6	4320.86	7561.5	7561.5	10802.1	10802.1	15123	15123	25925.2	25925.2	37807.5	37807.5	64812.9	64812.9	75615	75615	129626	129626	75615
CUMULATIVE WATER PRODUCTION [m3]																												CUMULATIVE WATER PRODUCTION [m3]
	m3	m3	m3	m3	m3	m3	m3	m3	m3	m3	m3	m3	m3	m3	m3	m3	m3	m3	m3	m3	m3	m3	m3	m3
	HP	2_S	2_Ds	2_Dl	5_S	5_Ds	5_H	5_Dl	10_S	10_Ds	10_H	10_Dl	25_S	25_Ds	25_H	25_Dl	50_S	50_Ds	50_H	50_Dl	50_S2	50_Ds2	50_H2	50_Dl2					HP	2_S	2_Ds	2_Dl	5_S	5_Ds	5_H	5_Dl	10_S	10_Ds	10_H	10_Dl	25_S	25_Ds	25_H	25_Dl	50_S	50_Ds	50_H	50_Dl	50_S2
1	2737.5	5110	5110	7300	12775	12775	18250	18250	25550	25550	43800	43800	63875	63875	109500	109500	127750	127750	219000	219000	127750	127750	219000	219000				1	2737.5	5110	5110	7300	12775	12775	18250	18250	25550	25550	43800	43800	63875	63875	109500	109500	127750	127750	219000	219000	127750
2	5475	10220	10220	14600	25550	25550	36500	36500	51100	51100	87600	87600	127750	127750	219000	219000	255500	255500	438000	438000	255500	255500	438000	438000				2	5320.05	9930.75	9930.75	14186.8	24826.9	24826.9	35467	35467	49653.8	49653.8	85120.8	85120.8	124134	124134	212802	212802	248269	248269	425604	425604	248269
3	8212.5	15330	15330	21900	38325	38325	54750	54750	76650	76650	131400	131400	191625	191625	328500	328500	383250	383250	657000	657000	383250	383250	657000	657000				3	7756.41	14478.6	14478.6	20683.8	36196.6	36196.6	51709.4	51709.4	72393.2	72393.2	124103	124103	180983	180983	310256	310256	361966	361966	620513	620513	361966
4	10950	20440	20440	29200	51100	51100	73000	73000	102200	102200	175200	175200	255500	255500	438000	438000	511000	511000	876000	876000	511000	511000	876000	876000				4	10054.9	18769.1	18769.1	26813	46922.7	46922.7	67032.5	67032.5	93845.5	93845.5	160878	160878	234614	234614	402195	402195	469227	469227	804390	804390	469227
5	13687.5	25550	25550	36500	63875	63875	91250	91250	127750	127750	219000	219000	319375	319375	547500	547500	638750	638750	1095000	1095000	638750	638750	1095000	1095000				5	12223.2	22816.7	22816.7	32595.3	57041.7	57041.7	81488.2	81488.2	114083	114083	195572	195572	285209	285209	488929	488929	570417	570417	977858	977858	570417
6	16425	30660	30660	43800	76650	76650	109500	109500	153300	153300	262800	262800	383250	383250	657000	657000	766500	766500	1314000	1314000	766500	766500	1314000	1314000				6	14268.8	26635.2	26635.2	38050.3	66587.9	66587.9	95125.6	95125.6	133176	133176	228302	228302	332940	332940	570754	570754	665879	665879	1.14151e+06	1.14151e+06	665879
7	19162.5	35770	35770	51100	89425	89425	127750	127750	178850	178850	306600	306600	447125	447125	766500	766500	894250	894250	1533000	1533000	894250	894250	1533000	1533000				7	16198.7	30237.5	30237.5	43196.5	75593.8	75593.8	107991	107991	151188	151188	259179	259179	377969	377969	647947	647947	755938	755938	1.29589e+06	1.29589e+06	755938
8	21900	40880	40880	58400	102200	102200	146000	146000	204400	204400	350400	350400	511000	511000	876000	876000	1022000	1022000	1752000	1752000	1022000	1022000	1752000	1752000				8	18019.3	33636	33636	48051.4	84089.9	84089.9	120128	120128	168180	168180	288308	288308	420450	420450	720771	720771	840899	840899	1.44154e+06	1.44154e+06	840899
9	24637.5	45990	45990	65700	114975	114975	164250	164250	229950	229950	394200	394200	574875	574875	985500	985500	1149750	1149750	1971000	1971000	1149750	1149750	1971000	1971000				9	19736.8	36842	36842	52631.5	92105.1	92105.1	131579	131579	184210	184210	315789	315789	460526	460526	789472	789472	921051	921051	1.57894e+06	1.57894e+06	921051
10	27375	51100	51100	73000	127750	127750	182500	182500	255500	255500	438000	438000	638750	638750	1095000	1095000	1277500	1277500	2190000	2190000	1277500	1277500	2190000	2190000				10	21357.1	39866.6	39866.6	56952.4	99666.6	99666.6	142381	142381	199333	199333	341714	341714	498333	498333	854285	854285	996666	996666	1.70857e+06	1.70857e+06	996666
CUMULATIVE COSTS [USD]																												NPV - DISCOUNT RATE = 7.5%
	USD	USD	USD	USD	USD	USD	USD	USD	USD	USD	USD	USD	USD	USD	USD	USD	USD	USD	USD	USD	USD	USD	USD	USD
	HP	2_S	2_Ds	2_Dl	5_S	5_Ds	5_H	5_Dl	10_S	10_Ds	10_H	10_Dl	25_S	25_Ds	25_H	25_Dl	50_S	50_Ds	50_H	50_Dl	50_S2	50_Ds2	50_H2	50_Dl2					HP	2_S	2_Ds	2_Dl	5_S	5_Ds	5_H	5_Dl	10_S	10_Ds	10_H	10_Dl	25_S	25_Ds	25_H	25_Dl	50_S	50_Ds	50_H	50_Dl	50_S2
1	485.11	4132.17	7686.24	9243.48	4461.41	8004.39	6290.71	9633.69	9036.78	18015.3	16091	24819.5	10433	33029.1	27854.2	50200.3	12083	42265.4	36023	65105.4	12683	42265.4	36023	65105.4				1	485.11	4132.17	7686.24	9243.48	4461.41	8004.39	6290.71	9633.69	9036.78	18015.3	16091	24819.5	10433	33029.1	27854.2	50200.3	12083	42265.4	36023	65105.4	12683
2	1804.22	8264.34	17969.6	21084.1	8922.82	18699.4	12581.4	21958	18073.6	36030.5	32182	54965	20865.9	66058.2	55708.5	108098	24165.9	84530.8	72046	138667	25365.9	84530.8	72046	138667				2	1729.55	8030.45	17387.5	20413.8	8670.29	18094	12225.4	21260.4	17562	35010.8	31271.2	53258.7	20275.4	64188.6	54131.8	104821	23482	82138.4	70007	134504	24648
3	3555.17	12396.5	25655.8	32924.6	13384.2	26703.8	18872.1	34282.2	27110.3	59371.8	48273.1	79784.5	31298.9	106785	83562.7	158299	36248.9	135253	108069	203773	38048.9	135253	108069	203773				3	3287.89	11708.1	24228.2	30951.9	12640.9	25217.9	17824.1	32228.9	25604.7	55784.5	45592.2	75348	29560.7	100435	78922	149499	34235.8	127281	102067	192447	35935.8
4	4874.28	16528.7	35939.1	42168.1	17845.6	37398.7	25162.9	43915.9	36147.1	77387.1	64364.1	109930	41731.9	139814	111417	216197	48331.9	177518	144092	277335	50731.9	177518	144092	277335				4	4395.44	15177.5	32862.3	38712.9	16386.8	34197.6	23105.9	40317.6	33192.2	70910.4	59102.5	100659	38320.4	128167	102309	198112	44380.9	162768	132313	254211	46584.7
5	5359.39	20660.9	43625.4	62022.1	22307.1	45403.1	38319.4	65742.2	45183.9	95402.3	91053.1	139529	52164.9	172843	161210	279588	60414.9	219784	208792	361513	63414.9	219784	208792	361513				5	4779.7	18450.6	38950.5	54439.1	19920.7	40537.8	33527.1	57606	40350.2	85180.2	80242.7	124104	46584.3	154329	141750	248324	53951.7	196246	183561	320888	56630.8
6	7944.34	24793	59968.6	73862.7	26768.5	62376.1	44610.2	78066.5	54220.7	118744	107144	182102	62597.8	213570	189064	355448	72497.8	270505	244815	454806	76097.8	270505	244815	454806				6	6711.32	21538.4	51163.1	63287.1	23254.5	53221	38227.9	66815.4	47103	102622	92266.9	155917	54380.4	184763	162564	305010	62980.8	234148	210480	390602	66108.3
7	8429.45	32378.8	69608.4	85703.3	37719.2	73604.5	54166.2	90390.8	66679.2	136759	126657	210344	79130.4	246599	223018	405648	108856	312771	305113	519912	113056	312771	280838	519912				7	7053.31	26886	57958.8	71634.2	30974.3	61136.6	44964.5	75503.6	55885.8	115322	106023	175826	66035.2	208047	186500	340400	88611.8	263944	252988	436499	92162.1
8	9748.56	36510.9	79891.7	94946.7	42180.6	84299.5	60456.9	100024	80495.9	159554	142748	240489	102754	292819	250872	463547	140011	374108	341136	593474	144811	374108	316861	593474				8	7930.59	29634.1	64797.8	77781.7	33941.4	68249.3	49148.2	81910.5	65074.6	130482	116724	195875	81746.6	238786	205025	378905	109332	304737	276945	485422	113281
9	11499.5	40643.1	87578	112847	46642	92303.8	66747.6	118627	89532.7	182895	164165	265309	113187	333546	286424	513747	152094	424830	385616	658579	157494	424830	361341	658579				9	9029.16	32226.7	69620.2	89012.6	36740.5	73271.4	53095.1	93581.8	70744.4	145127	130161	211447	88292.4	264339	227330	410402	116913	336560	304852	526270	121239
10	12818.6	44775.3	97861.3	126641	51103.4	102999	79904.2	134175	98569.5	218664	185528	300234	123620	392235	328519	584836	164177	495284	441859	751214	170177	495284	417584	751214				10	9809.94	34672.6	75706.9	97177.4	39381.2	79601.7	60882.5	102785	76093.3	166298	142806	232119	94467.7	299076	252246	452479	124065	378262	338142	581100	128746
YEARLY COSTS [USD/YEAR]																												LWC - DISCOUNT RATE = 7.5%
	USD/m3	USD/m3	USD/m3	USD/m3	USD/m3	USD/m3	USD/m3	USD/m3	USD/m3	USD/m3	USD/m3	USD/m3	USD/m3	USD/m3	USD/m3	USD/m3	USD/m3	USD/m3	USD/m3	USD/m3	USD/m3	USD/m3	USD/m3	USD/m3
	HP	2_S	2_Ds	2_Dl	5_S	5_Ds	5_H	5_Dl	10_S	10_Ds	10_H	10_Dl	25_S	25_Ds	25_H	25_Dl	50_S	50_Ds	50_H	50_Dl	50_S2	50_Ds2	50_H2	50_Dl2	normal_min	normal_max			HP	2_S	2_Ds	2_Dl	5_S	5_Ds	5_H	5_Dl	10_S	10_Ds	10_H	10_Dl	25_S	25_Ds	25_H	25_Dl	50_S	50_Ds	50_H	50_Dl	50_S2
1	0.177209	0.808644	1.50416	1.26623	0.34923	0.626567	0.344697	0.527874	0.35369	0.705098	0.367375	0.566655	0.163334	0.517089	0.254377	0.458451	0.0945829	0.330845	0.164489	0.297285	0.0992796	0.330845	0.164489	0.297285	0.123556	0.834		1	0.177209	0.808644	1.50416	1.26623	0.34923	0.626567	0.344697	0.527874	0.35369	0.705098	0.367375	0.566655	0.163334	0.517089	0.254377	0.458451	0.0945829	0.330845	0.164489	0.297285	0.0992796
2	0.329538	0.808644	1.75828	1.44411	0.34923	0.731873	0.344697	0.601588	0.35369	0.705098	0.367375	0.627455	0.163334	0.517089	0.254377	0.4936	0.0945829	0.330845	0.164489	0.316592	0.0992796	0.330845	0.164489	0.316592	0.123556	0.834		2	0.325101	0.808644	1.75087	1.43893	0.34923	0.728806	0.344697	0.599441	0.35369	0.705098	0.367375	0.625684	0.163334	0.517089	0.254377	0.492577	0.0945829	0.330845	0.164489	0.31603	0.0992796
3	0.432898	0.808644	1.67357	1.50341	0.34923	0.696771	0.344697	0.62616	0.35369	0.774584	0.367375	0.607188	0.163334	0.55726	0.254377	0.481884	0.0945829	0.35291	0.164489	0.310157	0.0992796	0.35291	0.164489	0.310157	0.123556	0.834		3	0.423894	0.808644	1.67338	1.49643	0.34923	0.696692	0.344697	0.62327	0.35369	0.770576	0.367375	0.607142	0.163334	0.554944	0.254377	0.481857	0.0945829	0.351637	0.164489	0.310142	0.0992796
4	0.44514	0.808644	1.75828	1.44411	0.34923	0.731873	0.344697	0.601588	0.35369	0.757212	0.367375	0.627455	0.163334	0.547218	0.254377	0.4936	0.0945829	0.347394	0.164489	0.316592	0.0992796	0.347394	0.164489	0.316592	0.123556	0.834		4	0.437146	0.808644	1.75087	1.44381	0.34923	0.728806	0.344697	0.601463	0.35369	0.755608	0.367375	0.625684	0.163334	0.546291	0.254377	0.492577	0.0945829	0.346884	0.164489	0.31603	0.0992796
5	0.391554	0.808644	1.70745	1.69924	0.34923	0.710812	0.419939	0.720463	0.35369	0.746789	0.415768	0.637121	0.163334	0.541192	0.294447	0.510664	0.0945829	0.344084	0.190678	0.330148	0.0992796	0.344084	0.190678	0.330148	0.123556	0.834		5	0.391034	0.808644	1.70711	1.67015	0.34923	0.710669	0.411435	0.706925	0.35369	0.746648	0.410298	0.634572	0.163334	0.54111	0.289918	0.507893	0.0945829	0.344039	0.187718	0.328154	0.0992796
6	0.483674	0.808644	1.95592	1.68636	0.34923	0.813778	0.407399	0.712936	0.35369	0.774584	0.407702	0.692932	0.163334	0.55726	0.287769	0.541017	0.0945829	0.35291	0.186313	0.346124	0.0992796	0.35291	0.186313	0.346124	0.123556	0.834		6	0.470348	0.808644	1.92089	1.66325	0.34923	0.799259	0.401868	0.702392	0.35369	0.770576	0.404145	0.682944	0.163334	0.554944	0.284823	0.534399	0.0945829	0.351637	0.184388	0.342181	0.0992796
7	0.439893	0.905193	1.946	1.67717	0.421797	0.823086	0.424001	0.70756	0.372822	0.764657	0.413101	0.686053	0.176976	0.551522	0.290956	0.529222	0.121729	0.349758	0.19903	0.339147	0.126425	0.349758	0.183195	0.339147	0.123556	0.834		7	0.435425	0.889161	1.91678	1.65834	0.409747	0.808751	0.416372	0.699164	0.369645	0.762775	0.409071	0.678397	0.174711	0.550434	0.287832	0.525351	0.117221	0.34916	0.195222	0.336833	0.121918
8	0.44514	0.893124	1.9543	1.6258	0.412726	0.824848	0.414088	0.685099	0.393816	0.780597	0.407386	0.686328	0.201085	0.573032	0.286384	0.529163	0.136997	0.366055	0.194712	0.338741	0.141694	0.366055	0.180857	0.338741	0.123556	0.834		8	0.440117	0.881026	1.92644	1.61872	0.403632	0.811623	0.40913	0.681858	0.386935	0.77585	0.404858	0.679393	0.194427	0.56793	0.284452	0.525695	0.130018	0.362394	0.192117	0.336738	0.134714
9	0.466748	0.883738	1.90428	1.71761	0.405671	0.802817	0.406378	0.722233	0.389357	0.79537	0.416451	0.673031	0.196891	0.580207	0.290638	0.521306	0.132284	0.369498	0.195645	0.334135	0.136981	0.369498	0.183329	0.334135	0.123556	0.834		9	0.457478	0.874727	1.8897	1.69124	0.398898	0.795519	0.403523	0.711223	0.384042	0.787833	0.412178	0.669583	0.191721	0.573993	0.287952	0.519843	0.126934	0.365409	0.193073	0.333305	0.131631
10	0.46826	0.876228	1.91509	1.73481	0.400027	0.806253	0.437831	0.735206	0.38579	0.855828	0.42358	0.685466	0.193535	0.614066	0.300018	0.534097	0.128514	0.387698	0.201762	0.34302	0.133211	0.387698	0.190678	0.34302	0.123556	0.834		10	0.459328	0.869713	1.899	1.70629	0.39513	0.79868	0.427603	0.721901	0.381739	0.834273	0.417911	0.679279	0.189567	0.600153	0.295272	0.529658	0.12448	0.379527	0.19791	0.340109	0.129176
	TOTAL COSTS, year by year									AGGREGATED COSTS						CONTRIBUTION at 3,5,10 year
		Salary	Fuel	Minor maint.	Major maint.		TOT	CHECK			Salary	Fuel	Minor maint.	Major maint.			Salary	Fuel	Minor maint.	Major maint.	TOT		Salary	Fuel	Minor maint.	Major maint.		TOT	CHECK
HP	1	172.36	0	312.75	0		485.11	485.11		1	172.36	0	312.75	0		1	0.355301	0	0.644699	0	1		0.0629626	0	0.114247	0		0.177209	0.177209
	2	172.36	0	312.75	834		1319.11	1319.11		2	344.72	0	625.5	834		2	0.191063	0	0.346687	0.46225	1		0.0629626	0	0.114247	0.152329		0.329538	0.329538
	3	172.36	0	312.75	1265.84		1750.95	1750.95		3	517.08	0	938.25	2099.84		3	0.145444	0	0.263911	0.590644	1		0.0629626	0	0.114247	0.255688		0.432898	0.432898
	4	172.36	0	312.75	834		1319.11	1319.11		4	689.44	0	1251	2933.84		4	0.141444	0	0.256653	0.601902	1		0.0629626	0	0.114247	0.267931		0.44514	0.44514
	5	172.36	0	312.75	0		485.11	485.11		5	861.8	0	1563.75	2933.84		5	0.160802	0	0.291778	0.547421	1		0.0629626	0	0.114247	0.214345		0.391554	0.391554
	6	172.36	0	312.75	2099.84		2584.95	2584.95		6	1034.16	0	1876.5	5033.68		6	0.130176	0	0.236206	0.633618	1		0.0629626	0	0.114247	0.306465		0.483674	0.483674
	7	172.36	0	312.75	0		485.11	485.11		7	1206.52	0	2189.25	5033.68		7	0.143131	0	0.259714	0.597154	1		0.0629626	0	0.114247	0.262684		0.439893	0.439893
	8	172.36	0	312.75	834		1319.11	1319.11		8	1378.88	0	2502	5867.68		8	0.141444	0	0.256653	0.601902	1		0.0629626	0	0.114247	0.267931		0.44514	0.44514
	9	172.36	0	312.75	1265.84		1750.95	1750.95		9	1551.24	0	2814.75	7133.52		9	0.134896	0	0.244771	0.620333	1		0.0629626	0	0.114247	0.289539		0.466748	0.466748
	10	172.36	0	312.75	834		1319.11	1319.11		10	1723.6	0	3127.5	7967.52		10	0.134461	0	0.243981	0.621558	1		0.0629626	0	0.114247	0.291051		0.46826	0.46826
2_S	1	3302.48	0	829.692	0		4132.17	4132.17		1	3302.48	0	829.692	0		1	0.799212	0	0.200788	0	1
	2	3302.48	0	829.692	0		4132.17	4132.17		2	6604.96	0	1659.38	0		2	0.799212	0	0.200788	0	1
	3	3302.48	0	829.692	0		4132.17	4132.17		3	9907.44	0	2489.08	0		3	0.799212	0	0.200788	0	1
	4	3302.48	0	829.692	0		4132.17	4132.17		4	13209.9	0	3318.77	0		4	0.799212	0	0.200788	0	1
	5	3302.48	0	829.692	0		4132.17	4132.17		5	16512.4	0	4148.46	0		5	0.799212	0	0.200788	0	1
	6	3302.48	0	829.692	0		4132.17	4132.17		6	19814.9	0	4978.15	0		6	0.799212	0	0.200788	0	1
	7	3302.48	0	829.692	3453.55		7585.72	7585.72		7	23117.4	0	5807.84	3453.55		7	0.713967	0	0.179372	0.106661	1
	8	3302.48	0	829.692	0		4132.17	4132.17		8	26419.8	0	6637.54	3453.55		8	0.723615	0	0.181796	0.0945895	1
	9	3302.48	0	829.692	0		4132.17	4132.17		9	29722.3	0	7467.23	3453.55		9	0.731301	0	0.183727	0.0849726	1
	10	3302.48	0	829.692	0		4132.17	4132.17		10	33024.8	0	8296.92	3453.55		10	0.737568	0	0.185301	0.0771307	1
2_Ds	1	3302.48	2983.22	1400.54	0		7686.24	7686.24		1	3302.48	2983.22	1400.54	0		1	0.429661	0.388125	0.182214	0	1
	2	3302.48	2983.22	1400.54	2597.09		10283.3	10283.3		2	6604.96	5966.44	2801.08	2597.09		2	0.367564	0.33203	0.155879	0.144527	1
	3	3302.48	2983.22	1400.54	0		7686.24	7686.24		3	9907.44	8949.65	4201.62	2597.09		3	0.386167	0.348835	0.163769	0.101228	1
	4	3302.48	2983.22	1400.54	2597.09		10283.3	10283.3		4	13209.9	11932.9	5602.17	5194.19		4	0.367564	0.33203	0.155879	0.144527	1
	5	3302.48	2983.22	1400.54	0		7686.24	7686.24		5	16512.4	14916.1	7002.71	5194.19		5	0.378504	0.341913	0.160519	0.119063	1
	6	3302.48	2983.22	1400.54	8656.98		16343.2	16343.2		6	19814.9	17899.3	8403.25	13851.2		6	0.330421	0.298478	0.140127	0.230974	1
	7	3302.48	2983.22	1400.54	1953.55		9639.79	9639.79		7	23117.4	20882.5	9803.79	15804.7		7	0.332106	0.3	0.140842	0.227052	1
	8	3302.48	2983.22	1400.54	2597.09		10283.3	10283.3		8	26419.8	23865.7	11204.3	18401.8		8	0.330696	0.298726	0.140244	0.230334	1
	9	3302.48	2983.22	1400.54	0		7686.24	7686.24		9	29722.3	26849	12604.9	18401.8		9	0.339381	0.306572	0.143927	0.210119	1
	10	3302.48	2983.22	1400.54	2597.09		10283.3	10283.3		10	33024.8	29832.2	14005.4	20998.9		10	0.337465	0.304841	0.143115	0.214578	1
2_Dl	1	3302.48	4261.74	1679.26	0		9243.48	9243.48		1	3302.48	4261.74	1679.26	0		1	0.357277	0.461054	0.18167	0	1
	2	3302.48	4261.74	1679.26	2597.09		11840.6	11840.6		2	6604.96	8523.48	3358.52	2597.09		2	0.313268	0.404262	0.159292	0.123178	1
	3	3302.48	4261.74	1679.26	2597.09		11840.6	11840.6		3	9907.44	12785.2	5037.78	5194.19		3	0.300913	0.388318	0.153009	0.15776	1
	4	3302.48	4261.74	1679.26	0		9243.48	9243.48		4	13209.9	17047	6717.04	5194.19		4	0.313268	0.404262	0.159292	0.123178	1
	5	3302.48	4261.74	1679.26	10610.5		19854	19854		5	16512.4	21308.7	8396.3	15804.7		5	0.266234	0.343566	0.135376	0.254824	1
	6	3302.48	4261.74	1679.26	2597.09		11840.6	11840.6		6	19814.9	25570.4	10075.6	18401.8		6	0.268266	0.346189	0.136409	0.249135	1
	7	3302.48	4261.74	1679.26	2597.09		11840.6	11840.6		7	23117.4	29832.2	11754.8	20998.9		7	0.269737	0.348087	0.137157	0.245019	1
	8	3302.48	4261.74	1679.26	0		9243.48	9243.48		8	26419.8	34093.9	13434.1	20998.9		8	0.27826	0.359085	0.141491	0.221165	1
	9	3302.48	4261.74	1679.26	8656.98		17900.5	17900.5		9	29722.3	38355.7	15113.3	29655.9		9	0.263386	0.33989	0.133927	0.262797	1
	10	3302.48	4261.74	1679.26	4550.64		13794.1	13794.1		10	33024.8	42617.4	16792.6	34206.5		10	0.260774	0.336521	0.1326	0.270105	1
5_S	1	3352.48	0	1108.93	0		4461.41	4461.41		1	3352.48	0	1108.93	0		1	0.75144	0	0.24856	0	1
	2	3352.48	0	1108.93	0		4461.41	4461.41		2	6704.96	0	2217.86	0		2	0.75144	0	0.24856	0	1
	3	3352.48	0	1108.93	0		4461.41	4461.41		3	10057.4	0	3326.79	0		3	0.75144	0	0.24856	0	1
	4	3352.48	0	1108.93	0		4461.41	4461.41		4	13409.9	0	4435.72	0		4	0.75144	0	0.24856	0	1
	5	3352.48	0	1108.93	0		4461.41	4461.41		5	16762.4	0	5544.65	0		5	0.75144	0	0.24856	0	1
	6	3352.48	0	1108.93	0		4461.41	4461.41		6	20114.9	0	6653.58	0		6	0.75144	0	0.24856	0	1
	7	3352.48	0	1108.93	6489.29		10950.7	10950.7		7	23467.4	0	7762.51	6489.29		7	0.62216	0	0.205798	0.172042	1
	8	3352.48	0	1108.93	0		4461.41	4461.41		8	26819.8	0	8871.44	6489.29		8	0.635834	0	0.210321	0.153845	1
	9	3352.48	0	1108.93	0		4461.41	4461.41		9	30172.3	0	9980.37	6489.29		9	0.646892	0	0.213978	0.13913	1
	10	3352.48	0	1108.93	0		4461.41	4461.41		10	33524.8	0	11089.3	6489.29		10	0.656019	0	0.216997	0.126983	1
5_Ds	1	3352.48	2983.22	1668.69	0		8004.39	8004.39		1	3352.48	2983.22	1668.69	0		1	0.41883	0.372698	0.208472	0	1
	2	3352.48	2983.22	1668.69	2690.58		10695	10695		2	6704.96	5966.44	3337.38	2690.58		2	0.358566	0.319072	0.178476	0.143886	1
	3	3352.48	2983.22	1668.69	0		8004.39	8004.39		3	10057.4	8949.65	5006.07	2690.58		3	0.37663	0.335146	0.187467	0.100757	1
	4	3352.48	2983.22	1668.69	2690.58		10695	10695		4	13409.9	11932.9	6674.76	5381.17		4	0.358566	0.319072	0.178476	0.143886	1
	5	3352.48	2983.22	1668.69	0		8004.39	8004.39		5	16762.4	14916.1	8343.45	5381.17		5	0.369191	0.328526	0.183764	0.11852	1
	6	3352.48	2983.22	1668.69	8968.61		16973	16973		6	20114.9	17899.3	10012.1	14349.8		6	0.322477	0.286958	0.160512	0.230053	1
	7	3352.48	2983.22	1668.69	3223.98		11228.4	11228.4		7	23467.4	20882.5	11680.8	17573.8		7	0.318831	0.283713	0.158697	0.238759	1
	8	3352.48	2983.22	1668.69	2690.58		10695	10695		8	26819.8	23865.7	13349.5	20264.3		8	0.31815	0.283107	0.158358	0.240385	1
	9	3352.48	2983.22	1668.69	0		8004.39	8004.39		9	30172.3	26849	15018.2	20264.3		9	0.32688	0.290876	0.162704	0.21954	1
	10	3352.48	2983.22	1668.69	2690.58		10695	10695		10	33524.8	29832.2	16686.9	22954.9		10	0.325487	0.289636	0.162011	0.222866	1
5_H	1	3352.48	1278.52	1659.71	0		6290.71	6290.71		1	3352.48	1278.52	1659.71	0		1	0.532925	0.20324	0.263835	0	1
	2	3352.48	1278.52	1659.71	0		6290.71	6290.71		2	6704.96	2557.04	3319.42	0		2	0.532925	0.20324	0.263835	0	1
	3	3352.48	1278.52	1659.71	0		6290.71	6290.71		3	10057.4	3835.57	4979.14	0		3	0.532925	0.20324	0.263835	0	1
	4	3352.48	1278.52	1659.71	0		6290.71	6290.71		4	13409.9	5114.09	6638.85	0		4	0.532925	0.20324	0.263835	0	1
	5	3352.48	1278.52	1659.71	6865.88		13156.6	13156.6		5	16762.4	6392.61	8298.56	6865.88		5	0.437438	0.166824	0.216563	0.179175	1
	6	3352.48	1278.52	1659.71	0		6290.71	6290.71		6	20114.9	7671.13	9958.27	6865.88		6	0.450904	0.171959	0.223229	0.153908	1
	7	3352.48	1278.52	1659.71	3265.31		9556.02	9556.02		7	23467.4	8949.65	11618	10131.2		7	0.433247	0.165226	0.214488	0.187039	1
	8	3352.48	1278.52	1659.71	0		6290.71	6290.71		8	26819.8	10228.2	13277.7	10131.2		8	0.443619	0.169181	0.219623	0.167577	1
	9	3352.48	1278.52	1659.71	0		6290.71	6290.71		9	30172.3	11506.7	14937.4	10131.2		9	0.452036	0.172391	0.223789	0.151784	1
	10	3352.48	1278.52	1659.71	6865.88		13156.6	13156.6		10	33524.8	12785.2	16597.1	16997.1		10	0.419562	0.160007	0.207713	0.212718	1
5_Dl	1	3352.48	4261.74	2019.47	0		9633.69	9633.69		1	3352.48	4261.74	2019.47	0		1	0.347995	0.442379	0.209626	0	1
	2	3352.48	4261.74	2019.47	2690.58		12324.3	12324.3		2	6704.96	8523.48	4038.95	2690.58		2	0.305354	0.388173	0.18394	0.122533	1
	3	3352.48	4261.74	2019.47	2690.58		12324.3	12324.3		3	10057.4	12785.2	6058.42	5381.17		3	0.293372	0.37294	0.176722	0.156967	1
	4	3352.48	4261.74	2019.47	0		9633.69	9633.69		4	13409.9	17047	8077.89	5381.17		4	0.305354	0.388173	0.18394	0.122533	1
	5	3352.48	4261.74	2019.47	12192.6		21826.3	21826.3		5	16762.4	21308.7	10097.4	17573.8		5	0.254972	0.324125	0.15359	0.267313	1
	6	3352.48	4261.74	2019.47	2690.58		12324.3	12324.3		6	20114.9	25570.4	12116.8	20264.3		6	0.257663	0.327547	0.155212	0.259578	1
	7	3352.48	4261.74	2019.47	2690.58		12324.3	12324.3		7	23467.4	29832.2	14136.3	22954.9		7	0.259621	0.330036	0.156391	0.253952	1
	8	3352.48	4261.74	2019.47	0		9633.69	9633.69		8	26819.8	34093.9	16155.8	22954.9		8	0.268133	0.340856	0.161518	0.229493	1
	9	3352.48	4261.74	2019.47	8968.61		18602.3	18602.3		9	30172.3	38355.7	18175.3	31923.5		9	0.254347	0.323331	0.153214	0.269109	1
	10	3352.48	4261.74	2019.47	5914.56		15548.3	15548.3		10	33524.8	42617.4	20194.7	37838.1		10	0.249859	0.317625	0.15051	0.282006	1
10_S	1	7489.12	0	1547.66	0		9036.78	9036.78		1	7489.12	0	1547.66	0		1	0.828738	0	0.171262	0	1
	2	7489.12	0	1547.66	0		9036.78	9036.78		2	14978.2	0	3095.32	0		2	0.828738	0	0.171262	0	1
	3	7489.12	0	1547.66	0		9036.78	9036.78		3	22467.4	0	4642.98	0		3	0.828738	0	0.171262	0	1
	4	7489.12	0	1547.66	0		9036.78	9036.78		4	29956.5	0	6190.64	0		4	0.828738	0	0.171262	0	1
	5	7489.12	0	1547.66	0		9036.78	9036.78		5	37445.6	0	7738.3	0		5	0.828738	0	0.171262	0	1
	6	7489.12	0	1547.66	0		9036.78	9036.78		6	44934.7	0	9285.96	0		6	0.828738	0	0.171262	0	1
	7	7489.12	0	1547.66	3421.79		12458.6	12458.6		7	52423.8	0	10833.6	3421.79		7	0.786209	0	0.162474	0.0513171	1
	8	7489.12	0	1547.66	4779.87		13816.7	13816.7		8	59913	0	12381.3	8201.66		8	0.744298	0	0.153813	0.101889	1
	9	7489.12	0	1547.66	0		9036.78	9036.78		9	67402.1	0	13928.9	8201.66		9	0.752821	0	0.155574	0.0916052	1
	10	7489.12	0	1547.66	0		9036.78	9036.78		10	74891.2	0	15476.6	8201.66		10	0.759781	0	0.157012	0.0832069	1
10_Ds	1	7489.12	8523.48	2002.66	0		18015.3	18015.3		1	7489.12	8523.48	2002.66	0		1	0.41571	0.473126	0.111164	0	1
	2	7489.12	8523.48	2002.66	0		18015.3	18015.3		2	14978.2	17047	4005.31	0		2	0.41571	0.473126	0.111164	0	1
	3	7489.12	8523.48	2002.66	5326.06		23341.3	23341.3		3	22467.4	25570.4	6007.97	5326.06		3	0.378418	0.430683	0.101192	0.0897068	1
	4	7489.12	8523.48	2002.66	0		18015.3	18015.3		4	29956.5	34093.9	8010.62	5326.06		4	0.387099	0.440563	0.103514	0.0688236	1
	5	7489.12	8523.48	2002.66	0		18015.3	18015.3		5	37445.6	42617.4	10013.3	5326.06		5	0.392502	0.446712	0.104958	0.0558273	1
	6	7489.12	8523.48	2002.66	5326.06		23341.3	23341.3		6	44934.7	51140.9	12015.9	10652.1		6	0.378418	0.430683	0.101192	0.0897068	1
	7	7489.12	8523.48	2002.66	0		18015.3	18015.3		7	52423.8	59664.4	14018.6	10652.1		7	0.38333	0.436274	0.102506	0.0778897	1
	8	7489.12	8523.48	2002.66	4779.87		22795.1	22795.1		8	59913	68187.8	16021.2	15432		8	0.375503	0.427365	0.100413	0.0967195	1
	9	7489.12	8523.48	2002.66	5326.06		23341.3	23341.3		9	67402.1	76711.3	18023.9	20758		9	0.368528	0.419427	0.0985476	0.113497	1
	10	7489.12	8523.48	2002.66	17753.5		35768.8	35768.8		10	74891.2	85234.8	20026.6	38511.6		10	0.342494	0.389798	0.0915859	0.176122	1
10_H	1	7489.12	6088.2	2513.7	0		16091	16091		1	7489.12	6088.2	2513.7	0		1	0.465422	0.37836	0.156218	0	1
	2	7489.12	6088.2	2513.7	0		16091	16091		2	14978.2	12176.4	5027.4	0		2	0.465422	0.37836	0.156218	0	1
	3	7489.12	6088.2	2513.7	0		16091	16091		3	22467.4	18264.6	7541.1	0		3	0.465422	0.37836	0.156218	0	1
	4	7489.12	6088.2	2513.7	0		16091	16091		4	29956.5	24352.8	10054.8	0		4	0.465422	0.37836	0.156218	0	1
	5	7489.12	6088.2	2513.7	10598		26689	26689		5	37445.6	30441	12568.5	10598		5	0.41125	0.334321	0.138035	0.116394	1
	6	7489.12	6088.2	2513.7	0		16091	16091		6	44934.7	36529.2	15082.2	10598		6	0.419386	0.340935	0.140766	0.0989134	1
	7	7489.12	6088.2	2513.7	3421.79		19512.8	19512.8		7	52423.8	42617.4	17595.9	14019.8		7	0.413904	0.336479	0.138926	0.110691	1
	8	7489.12	6088.2	2513.7	0		16091	16091		8	59913	48705.6	20109.6	14019.8		8	0.419712	0.3412	0.140875	0.0982135	1
	9	7489.12	6088.2	2513.7	5326.06		21417.1	21417.1		9	67402.1	54793.8	22623.3	19345.8		9	0.410575	0.333773	0.137808	0.117844	1
	10	7489.12	6088.2	2513.7	5271.93		21363	21363		10	74891.2	60882	25137	24617.8		10	0.403665	0.328155	0.135489	0.13269	1
10_Dl	1	7489.12	14611.7	2718.7	0		24819.5	24819.5		1	7489.12	14611.7	2718.7	0		1	0.301743	0.588718	0.109539	0	1
	2	7489.12	14611.7	2718.7	5326.06		30145.6	30145.6		2	14978.2	29223.4	5437.39	5326.06		2	0.272505	0.531672	0.0989245	0.096899	1
	3	7489.12	14611.7	2718.7	0		24819.5	24819.5		3	22467.4	43835	8156.09	5326.06		3	0.2816	0.549418	0.102226	0.0667555	1
	4	7489.12	14611.7	2718.7	5326.06		30145.6	30145.6		4	29956.5	58446.7	10874.8	10652.1		4	0.272505	0.531672	0.0989245	0.096899	1
	5	7489.12	14611.7	2718.7	4779.87		29599.4	29599.4		5	37445.6	73058.4	13593.5	15432		5	0.268371	0.523606	0.0974237	0.1106	1
	6	7489.12	14611.7	2718.7	17753.5		42573	42573		6	44934.7	87670.1	16312.2	33185.5		6	0.246755	0.481433	0.0895769	0.182235	1
	7	7489.12	14611.7	2718.7	3421.79		28241.3	28241.3		7	52423.8	102282	19030.9	36607.3		7	0.249229	0.48626	0.0904751	0.174036	1
	8	7489.12	14611.7	2718.7	5326.06		30145.6	30145.6		8	59913	116893	21749.6	41933.4		8	0.249129	0.486065	0.0904388	0.174367	1
	9	7489.12	14611.7	2718.7	0		24819.5	24819.5		9	67402.1	131505	24468.3	41933.4		9	0.254051	0.495668	0.0922256	0.158055	1
	10	7489.12	14611.7	2718.7	10105.9		34925.4	34925.4		10	74891.2	146117	27187	52039.3		10	0.249443	0.486676	0.0905525	0.173329	1
25_S	1	7739.12	0	2693.85	0		10433	10433		1	7739.12	0	2693.85	0		1	0.741794	0	0.258206	0	1
	2	7739.12	0	2693.85	0		10433	10433		2	15478.2	0	5387.7	0		2	0.741794	0	0.258206	0	1
	3	7739.12	0	2693.85	0		10433	10433		3	23217.4	0	8081.55	0		3	0.741794	0	0.258206	0	1
	4	7739.12	0	2693.85	0		10433	10433		4	30956.5	0	10775.4	0		4	0.741794	0	0.258206	0	1
	5	7739.12	0	2693.85	0		10433	10433		5	38695.6	0	13469.3	0		5	0.741794	0	0.258206	0	1
	6	7739.12	0	2693.85	0		10433	10433		6	46434.7	0	16163.1	0		6	0.741794	0	0.258206	0	1
	7	7739.12	0	2693.85	6099.58		16532.5	16532.5		7	54173.8	0	18857	6099.58		7	0.684615	0	0.238302	0.0770826	1
	8	7739.12	0	2693.85	13191.1		23624.1	23624.1		8	61913	0	21550.8	19290.7		8	0.602533	0	0.209731	0.187736	1
	9	7739.12	0	2693.85	0		10433	10433		9	69652.1	0	24244.7	19290.7		9	0.615369	0	0.214199	0.170432	1
	10	7739.12	0	2693.85	0		10433	10433		10	77391.2	0	26938.5	19290.7		10	0.626039	0	0.217913	0.156048	1
25_Ds	1	7739.12	22161	3128.92	0		33029.1	33029.1		1	7739.12	22161	3128.92	0		1	0.234312	0.670956	0.0947322	0	1
	2	7739.12	22161	3128.92	0		33029.1	33029.1		2	15478.2	44322.1	6257.83	0		2	0.234312	0.670956	0.0947322	0	1
	3	7739.12	22161	3128.92	7697.79		40726.9	40726.9		3	23217.4	66483.1	9386.75	7697.79		3	0.217421	0.622589	0.0879032	0.0720868	1
	4	7739.12	22161	3128.92	0		33029.1	33029.1		4	30956.5	88644.2	12515.7	7697.79		4	0.221412	0.634015	0.0895165	0.0550573	1
	5	7739.12	22161	3128.92	0		33029.1	33029.1		5	38695.6	110805	15644.6	7697.79		5	0.223877	0.641074	0.0905132	0.0445362	1
	6	7739.12	22161	3128.92	7697.79		40726.9	40726.9		6	46434.7	132966	18773.5	15395.6		6	0.217421	0.622589	0.0879032	0.0720868	1
	7	7739.12	22161	3128.92	0		33029.1	33029.1		7	54173.8	155127	21902.4	15395.6		7	0.219684	0.629067	0.0888179	0.0624316	1
	8	7739.12	22161	3128.92	13191.1		46220.2	46220.2		8	61913	177288	25031.3	28586.7		8	0.211437	0.605453	0.0854839	0.0976258	1
	9	7739.12	22161	3128.92	7697.79		40726.9	40726.9		9	69652.1	199449	28160.3	36284.5		9	0.208823	0.597966	0.0844268	0.108784	1
	10	7739.12	22161	3128.92	25659.3		58688.4	58688.4		10	77391.2	221610	31289.2	61943.8		10	0.197308	0.564995	0.0797716	0.157925	1
25_H	1	7739.12	15829.3	4285.79	0		27854.2	27854.2		1	7739.12	15829.3	4285.79	0		1	0.277844	0.568291	0.153865	0	1
	2	7739.12	15829.3	4285.79	0		27854.2	27854.2		2	15478.2	31658.6	8571.58	0		2	0.277844	0.568291	0.153865	0	1
	3	7739.12	15829.3	4285.79	0		27854.2	27854.2		3	23217.4	47488	12857.4	0		3	0.277844	0.568291	0.153865	0	1
	4	7739.12	15829.3	4285.79	0		27854.2	27854.2		4	30956.5	63317.3	17143.2	0		4	0.277844	0.568291	0.153865	0	1
	5	7739.12	15829.3	4285.79	21938.7		49792.9	49792.9		5	38695.6	79146.6	21429	21938.7		5	0.240033	0.490954	0.132926	0.136088	1
	6	7739.12	15829.3	4285.79	0		27854.2	27854.2		6	46434.7	94975.9	25714.8	21938.7		6	0.245603	0.502348	0.136011	0.116038	1
	7	7739.12	15829.3	4285.79	6099.58		33953.8	33953.8		7	54173.8	110805	30000.5	28038.2		7	0.242913	0.496845	0.134521	0.125722	1
	8	7739.12	15829.3	4285.79	0		27854.2	27854.2		8	61913	126635	34286.3	28038.2		8	0.246791	0.504777	0.136669	0.111763	1
	9	7739.12	15829.3	4285.79	7697.79		35552	35552		9	69652.1	142464	38572.1	35736		9	0.243178	0.497388	0.134668	0.124766	1
	10	7739.12	15829.3	4285.79	14240.9		42095.1	42095.1		10	77391.2	158293	42857.9	49976.9		10	0.235576	0.481838	0.130458	0.152128	1
25_Dl	1	7739.12	37990.4	4470.86	0		50200.3	50200.3		1	7739.12	37990.4	4470.86	0		1	0.154165	0.756775	0.0890603	0	1
	2	7739.12	37990.4	4470.86	7697.79		57898.1	57898.1		2	15478.2	75980.7	8941.72	7697.79		2	0.143186	0.702884	0.0827182	0.0712109	1
	3	7739.12	37990.4	4470.86	0		50200.3	50200.3		3	23217.4	113971	13412.6	7697.79		3	0.146668	0.719974	0.0847295	0.0486282	1
	4	7739.12	37990.4	4470.86	7697.79		57898.1	57898.1		4	30956.5	151961	17883.4	15395.6		4	0.143186	0.702884	0.0827182	0.0712109	1
	5	7739.12	37990.4	4470.86	13191.1		63391.5	63391.5		5	38695.6	189952	22354.3	28586.7		5	0.138402	0.679398	0.0799543	0.102246	1
	6	7739.12	37990.4	4470.86	25659.3		75859.6	75859.6		6	46434.7	227942	26825.1	54246		6	0.130637	0.641281	0.0754685	0.152613	1
	7	7739.12	37990.4	4470.86	0		50200.3	50200.3		7	54173.8	265933	31296	54246		7	0.133549	0.655574	0.0771506	0.133727	1
	8	7739.12	37990.4	4470.86	7697.79		57898.1	57898.1		8	61913	303923	35766.9	61943.8		8	0.133564	0.655647	0.0771592	0.13363	1
	9	7739.12	37990.4	4470.86	0		50200.3	50200.3		9	69652.1	341913	40237.7	61943.8		9	0.135577	0.665529	0.0783221	0.120573	1
	10	7739.12	37990.4	4470.86	20888.9		71089.3	71089.3		10	77391.2	379904	44708.6	82832.7		10	0.13233	0.64959	0.0764463	0.141634	1
50_S	1	7739.12	0	4343.85	0		12083	12083		1	7739.12	0	4343.85	0		1	0.640498	0	0.359502	0	1
	2	7739.12	0	4343.85	0		12083	12083		2	15478.2	0	8687.7	0		2	0.640498	0	0.359502	0	1
	3	7739.12	0	4343.85	0		12083	12083		3	23217.4	0	13031.6	0		3	0.640498	0	0.359502	0	1
	4	7739.12	0	4343.85	0		12083	12083		4	30956.5	0	17375.4	0		4	0.640498	0	0.359502	0	1
	5	7739.12	0	4343.85	0		12083	12083		5	38695.6	0	21719.3	0		5	0.640498	0	0.359502	0	1
	6	7739.12	0	4343.85	0		12083	12083		6	46434.7	0	26063.1	0		6	0.640498	0	0.359502	0	1
	7	7739.12	0	4343.85	24275		36357.9	36357.9		7	54173.8	0	30407	24275		7	0.497666	0	0.279333	0.223001	1
	8	7739.12	0	4343.85	19072.2		31155.2	31155.2		8	61913	0	34750.8	43347.2		8	0.442201	0	0.248201	0.309599	1
	9	7739.12	0	4343.85	0		12083	12083		9	69652.1	0	39094.7	43347.2		9	0.457954	0	0.257043	0.285003	1
	10	7739.12	0	4343.85	0		12083	12083		10	77391.2	0	43438.5	43347.2		10	0.471389	0	0.264584	0.264027	1
50_Ds	1	8239.12	29832.2	4194.09	0		42265.4	42265.4		1	8239.12	29832.2	4194.09	0		1	0.194938	0.70583	0.0992323	0	1
	2	8239.12	29832.2	4194.09	0		42265.4	42265.4		2	16478.2	59664.4	8388.18	0		2	0.194938	0.70583	0.0992323	0	1
	3	8239.12	29832.2	4194.09	8456.54		50721.9	50721.9		3	24717.4	89496.5	12582.3	8456.54		3	0.182749	0.661699	0.0930279	0.062524	1
	4	8239.12	29832.2	4194.09	0		42265.4	42265.4		4	32956.5	119329	16776.4	8456.54		4	0.185651	0.672206	0.0945051	0.0476376	1
	5	8239.12	29832.2	4194.09	0		42265.4	42265.4		5	41195.6	149161	20970.5	8456.54		5	0.187437	0.678672	0.0954142	0.0384767	1
	6	8239.12	29832.2	4194.09	8456.54		50721.9	50721.9		6	49434.7	178993	25164.6	16913.1		6	0.182749	0.661699	0.0930279	0.062524	1
	7	8239.12	29832.2	4194.09	0		42265.4	42265.4		7	57673.8	208825	29358.6	16913.1		7	0.184396	0.667662	0.0938663	0.054075	1
	8	8239.12	29832.2	4194.09	19072.2		61337.6	61337.6		8	65913	238657	33552.7	35985.3		8	0.176187	0.637936	0.0896872	0.0961896	1
	9	8239.12	29832.2	4194.09	8456.54		50721.9	50721.9		9	74152.1	268490	37746.8	44441.9		9	0.174545	0.631992	0.0888515	0.104611	1
	10	8239.12	29832.2	4194.09	28188.5		70453.9	70453.9		10	82391.2	298322	41940.9	72630.4		10	0.166351	0.602324	0.0846805	0.146644	1
50_H	1	8239.12	21308.7	6475.2	0		36023	36023		1	8239.12	21308.7	6475.2	0		1	0.228718	0.59153	0.179752	0	1
	2	8239.12	21308.7	6475.2	0		36023	36023		2	16478.2	42617.4	12950.4	0		2	0.228718	0.59153	0.179752	0	1
	3	8239.12	21308.7	6475.2	0		36023	36023		3	24717.4	63926.1	19425.6	0		3	0.228718	0.59153	0.179752	0	1
	4	8239.12	21308.7	6475.2	0		36023	36023		4	32956.5	85234.8	25900.8	0		4	0.228718	0.59153	0.179752	0	1
	5	8239.12	21308.7	6475.2	28676.9		64700	64700		5	41195.6	106543	32376	28676.9		5	0.197304	0.510285	0.155063	0.137347	1
	6	8239.12	21308.7	6475.2	0		36023	36023		6	49434.7	127852	38851.2	28676.9		6	0.201927	0.52224	0.158696	0.117137	1
	7	8239.12	21308.7	6475.2	24275		60298	60298		7	57673.8	149161	45326.4	52951.9		7	0.189024	0.488871	0.148556	0.173548	1
	8	8239.12	21308.7	6475.2	0		36023	36023		8	65913	170470	51801.6	52951.9		8	0.193216	0.499711	0.15185	0.155222	1
	9	8239.12	21308.7	6475.2	8456.54		44479.6	44479.6		9	74152.1	191778	58276.8	61408.4		9	0.192295	0.49733	0.151127	0.159248	1
	10	8239.12	21308.7	6475.2	20220.4		56243.4	56243.4		10	82391.2	213087	64752	81628.8		10	0.186465	0.482251	0.146545	0.184739	1
50_Dl	1	8239.12	51140.9	5725.44	0		65105.4	65105.4		1	8239.12	51140.9	5725.44	0		1	0.12655	0.785509	0.0879411	0	1
	2	8239.12	51140.9	5725.44	8456.54		73562	73562		2	16478.2	102282	11450.9	8456.54		2	0.118833	0.737605	0.0825781	0.0609844	1
	3	8239.12	51140.9	5725.44	0		65105.4	65105.4		3	24717.4	153423	17176.3	8456.54		3	0.121299	0.75291	0.0842915	0.0414998	1
	4	8239.12	51140.9	5725.44	8456.54		73562	73562		4	32956.5	204564	22901.8	16913.1		4	0.118833	0.737605	0.0825781	0.0609844	1
	5	8239.12	51140.9	5725.44	19072.2		84177.7	84177.7		5	41195.6	255704	28627.2	35985.3		5	0.113953	0.707318	0.0791873	0.099541	1
	6	8239.12	51140.9	5725.44	28188.5		93293.9	93293.9		6	49434.7	306845	34352.7	64173.8		6	0.108694	0.674672	0.0755325	0.141101	1
	7	8239.12	51140.9	5725.44	0		65105.4	65105.4		7	57673.8	357986	40078.1	64173.8		7	0.11093	0.688552	0.0770863	0.123432	1
	8	8239.12	51140.9	5725.44	8456.54		73562	73562		8	65913	409127	45803.5	72630.4		8	0.111063	0.689377	0.0771787	0.122382	1
	9	8239.12	51140.9	5725.44	0		65105.4	65105.4		9	74152.1	460268	51529	72630.4		9	0.112594	0.69888	0.0782426	0.110283	1
	10	8239.12	51140.9	5725.44	27528.8		92634.2	92634.2		10	82391.2	511409	57254.4	100159		10	0.109677	0.680777	0.0762159	0.13333	1
50_S2	1	7739.12	0	4943.85	0		12683	12683		1	7739.12	0	4943.85	0		1	0.610198	0	0.389802	0	1
	2	7739.12	0	4943.85	0		12683	12683		2	15478.2	0	9887.7	0		2	0.610198	0	0.389802	0	1
	3	7739.12	0	4943.85	0		12683	12683		3	23217.4	0	14831.6	0		3	0.610198	0	0.389802	0	1
	4	7739.12	0	4943.85	0		12683	12683		4	30956.5	0	19775.4	0		4	0.610198	0	0.389802	0	1
	5	7739.12	0	4943.85	0		12683	12683		5	38695.6	0	24719.3	0		5	0.610198	0	0.389802	0	1
	6	7739.12	0	4943.85	0		12683	12683		6	46434.7	0	29663.1	0		6	0.610198	0	0.389802	0	1
	7	7739.12	0	4943.85	24275		36957.9	36957.9		7	54173.8	0	34607	24275		7	0.479178	0	0.306105	0.214717	1
	8	7739.12	0	4943.85	19072.2		31755.2	31755.2		8	61913	0	39550.8	43347.2		8	0.427543	0	0.27312	0.299336	1
	9	7739.12	0	4943.85	0		12683	12683		9	69652.1	0	44494.7	43347.2		9	0.442252	0	0.282517	0.275231	1
	10	7739.12	0	4943.85	0		12683	12683		10	77391.2	0	49438.5	43347.2		10	0.454769	0	0.290512	0.254718	1
50_Ds2	1	8239.12	29832.2	4194.09	0		42265.4	42265.4		1	8239.12	29832.2	4194.09	0		1	0.194938	0.70583	0.0992323	0	1
	2	8239.12	29832.2	4194.09	0		42265.4	42265.4		2	16478.2	59664.4	8388.18	0		2	0.194938	0.70583	0.0992323	0	1
	3	8239.12	29832.2	4194.09	8456.54		50721.9	50721.9		3	24717.4	89496.5	12582.3	8456.54		3	0.182749	0.661699	0.0930279	0.062524	1
	4	8239.12	29832.2	4194.09	0		42265.4	42265.4		4	32956.5	119329	16776.4	8456.54		4	0.185651	0.672206	0.0945051	0.0476376	1
	5	8239.12	29832.2	4194.09	0		42265.4	42265.4		5	41195.6	149161	20970.5	8456.54		5	0.187437	0.678672	0.0954142	0.0384767	1
	6	8239.12	29832.2	4194.09	8456.54		50721.9	50721.9		6	49434.7	178993	25164.6	16913.1		6	0.182749	0.661699	0.0930279	0.062524	1
	7	8239.12	29832.2	4194.09	0		42265.4	42265.4		7	57673.8	208825	29358.6	16913.1		7	0.184396	0.667662	0.0938663	0.054075	1
	8	8239.12	29832.2	4194.09	19072.2		61337.6	61337.6		8	65913	238657	33552.7	35985.3		8	0.176187	0.637936	0.0896872	0.0961896	1
	9	8239.12	29832.2	4194.09	8456.54		50721.9	50721.9		9	74152.1	268490	37746.8	44441.9		9	0.174545	0.631992	0.0888515	0.104611	1
	10	8239.12	29832.2	4194.09	28188.5		70453.9	70453.9		10	82391.2	298322	41940.9	72630.4		10	0.166351	0.602324	0.0846805	0.146644	1
50_H2	1	8239.12	21308.7	6475.2	0		36023	36023		1	8239.12	21308.7	6475.2	0		1	0.228718	0.59153	0.179752	0	1
	2	8239.12	21308.7	6475.2	0		36023	36023		2	16478.2	42617.4	12950.4	0		2	0.228718	0.59153	0.179752	0	1
	3	8239.12	21308.7	6475.2	0		36023	36023		3	24717.4	63926.1	19425.6	0		3	0.228718	0.59153	0.179752	0	1
	4	8239.12	21308.7	6475.2	0		36023	36023		4	32956.5	85234.8	25900.8	0		4	0.228718	0.59153	0.179752	0	1
	5	8239.12	21308.7	6475.2	28676.9		64700	64700		5	41195.6	106543	32376	28676.9		5	0.197304	0.510285	0.155063	0.137347	1
	6	8239.12	21308.7	6475.2	0		36023	36023		6	49434.7	127852	38851.2	28676.9		6	0.201927	0.52224	0.158696	0.117137	1
	7	8239.12	21308.7	6475.2	0		36023	36023		7	57673.8	149161	45326.4	28676.9		7	0.205363	0.531128	0.161397	0.102112	1
	8	8239.12	21308.7	6475.2	0		36023	36023		8	65913	170470	51801.6	28676.9		8	0.208018	0.537995	0.163484	0.0905031	1
	9	8239.12	21308.7	6475.2	8456.54		44479.6	44479.6		9	74152.1	191778	58276.8	37133.5		9	0.205214	0.530741	0.161279	0.102766	1
	10	8239.12	21308.7	6475.2	20220.4		56243.4	56243.4		10	82391.2	213087	64752	57353.9		10	0.197304	0.510285	0.155063	0.137347	1
50_Dl2	1	8239.12	51140.9	5725.44	0		65105.4	65105.4		1	8239.12	51140.9	5725.44	0		1	0.12655	0.785509	0.0879411	0	1
	2	8239.12	51140.9	5725.44	8456.54		73562	73562		2	16478.2	102282	11450.9	8456.54		2	0.118833	0.737605	0.0825781	0.0609844	1
	3	8239.12	51140.9	5725.44	0		65105.4	65105.4		3	24717.4	153423	17176.3	8456.54		3	0.121299	0.75291	0.0842915	0.0414998	1
	4	8239.12	51140.9	5725.44	8456.54		73562	73562		4	32956.5	204564	22901.8	16913.1		4	0.118833	0.737605	0.0825781	0.0609844	1
	5	8239.12	51140.9	5725.44	19072.2		84177.7	84177.7		5	41195.6	255704	28627.2	35985.3		5	0.113953	0.707318	0.0791873	0.099541	1
	6	8239.12	51140.9	5725.44	28188.5		93293.9	93293.9		6	49434.7	306845	34352.7	64173.8		6	0.108694	0.674672	0.0755325	0.141101	1
	7	8239.12	51140.9	5725.44	0		65105.4	65105.4		7	57673.8	357986	40078.1	64173.8		7	0.11093	0.688552	0.0770863	0.123432	1
	8	8239.12	51140.9	5725.44	8456.54		73562	73562		8	65913	409127	45803.5	72630.4		8	0.111063	0.689377	0.0771787	0.122382	1
	9	8239.12	51140.9	5725.44	0		65105.4	65105.4		9	74152.1	460268	51529	72630.4		9	0.112594	0.69888	0.0782426	0.110283	1
	10	8239.12	51140.9	5725.44	27528.8		92634.2	92634.2		10	82391.2	511409	57254.4	100159		10	0.109677	0.680777	0.0762159	0.13333	1
															2119.54
															1111.11
[truncated: 32 more columns]

## Sheet: Carbon footprint
	HP	2_S	2_Ds	2_Dl	5_S	5_Ds	5_H	5_Dl	10_S	10_Ds	10_H	10_Dl	25_S	25_Ds	25_H	25_Dl	50_S	50_Ds	50_H	50_Dl	50_S2	50_Ds2	50_H2	50_Dl2	Truck (1)	Truck (2)			HP	2_S	2_Ds	2_Dl	5_S	5_Ds	5_H	5_Dl	10_S	10_Ds	10_H	10_Dl	25_S	25_Ds	25_H	25_Dl	50_S	50_Ds	50_H	50_Dl	50_S2
m3 / year	2737.5	5110	5110	7300	12775	12775	18250	18250	25550	25550	43800	43800	63875	63875	109500	109500	127750	127750	219000	219000	127750	127750	219000	219000	109500	0
[Borehole]	899.191	1107.15	1107.15	1107.15	1107.15	1107.15	1107.15	1107.15	1107.15	1107.15	1107.15	1107.15	1107.15	1107.15	1107.15	1107.15	1107.15	1107.15	1107.15	1107.15	1107.15	1107.15	1107.15	1107.15	1107.15	0			0.66991	0.0822747	0.0408568	0.0342772	0.0213045	0.0190533	0.016921	0.0166759	0.0134011	0.0118228	0.00877234	0.00886782	0.00808343	0.00603788	0.00438181	0.00414413	0.00538087	0.00450381	0.00281373	0.00283265	0.00557461
[Site]	169.667	2005.75	3307.62	3307.62	5969.82	6266.9	8219.17	6266.9	12714	6266.9	14963.4	6266.9	22830.4	6266.9	25079.7	6266.9	36318.8	6266.9	38568.2	6266.9	36318.8	6266.9	38568.2	6266.9	6266.9	0			0.126405	0.149052	0.12206	0.102404	0.114875	0.107849	0.125616	0.0943918	0.153893	0.0669217	0.11856	0.0501953	0.166687	0.0341767	0.099259	0.0234574	0.176513	0.0254933	0.0980179	0.0160339	0.182869
[Pumping]	210.306	1058.27	1957.08	1957.08	8980.56	3382.73	11946.7	3382.73	25659	10652	35797.7	10652	51694.1	30269.4	81355.2	30269.4	84566.2	41160.9	125013	41160.9	84566.2	41160.9	125013	41160.9	30269.4	0			0.156681	0.0786422	0.0722216	0.060591	0.17281	0.0582146	0.182585	0.0509506	0.310581	0.113748	0.283638	0.0853181	0.377425	0.165075	0.321983	0.1133	0.411	0.16744	0.317711	0.105311	0.425799
[Distribution]		9270.21	9270.21	9561.97	35871.8	35871.8	39236.4	39236.4	43058.9	43058.9	51006.7	51006.7	61141.5	61141.5	84519.1	84519.1	83380.2	83380.2	147043	147043	76229.2	76229.2	134785	134785	0	0			0	0.688889	0.342096	0.296037	0.690269	0.61733	0.599664	0.590978	0.521192	0.459809	0.404144	0.408543	0.446401	0.333437	0.334505	0.31636	0.405236	0.339185	0.373699	0.376211	0.383821
TOT kg CO2 eq	1279.16	13441.4	15642.1	15933.8	51929.3	46628.6	60509.4	49993.2	82539.1	61084.9	102875	69032.7	136773	98785	192061	122163	205372	131915	311732	195578	198221	124764	299473	183320	37643.5	0
1st year O&M	63.0918	15.3798	11456.2	16366.1	38.5246	11479.4	4921.28	16399.2	77.0492	32560.2	23334.4	55817.5	192.322	84582.4	60608.3	144998	384.644	113910	81749.1	195275	384.644	113910	81749.1	195275	267831				0.0470043	0.0011429	0.422766	0.506691	0.000741317	0.197553	0.0752136	0.247004	0.000932617	0.347698	0.184886	0.447076	0.00140417	0.461273	0.239872	0.542738	0.00186941	0.463379	0.207759	0.499611	0.00193672
TOT 1st year	1342.26	13456.8	27098.3	32299.9	51967.8	58107.9	65430.7	66392.4	82616.1	93645.2	126209	124850	136965	183367	252669	267161	205757	245825	393481	390853	198606	238674	381222	378594	305475	0			1	1	1	1	1	1	1	1	1	1	1	1	1	1	1	1	1	1	1	1	1
DISCOUNT RATE	0
YEARLY kg CO2-eq [kg CO2-eq/YEAR]
	kg CO2/y	kg CO2/y	kg CO2/y	kg CO2/y	kg CO2/y	kg CO2/y	kg CO2/y	kg CO2/y	kg CO2/y	kg CO2/y	kg CO2/y	kg CO2/y	kg CO2/y	kg CO2/y	kg CO2/y	kg CO2/y	kg CO2/y	kg CO2/y	kg CO2/y	kg CO2/y	kg CO2/y	kg CO2/y	kg CO2/y	kg CO2/y	kg CO2/y	kg CO2/y
	HP	2_S	2_Ds	2_Dl	5_S	5_Ds	5_H	5_Dl	10_S	10_Ds	10_H	10_Dl	25_S	25_Ds	25_H	25_Dl	50_S	50_Ds	50_H	50_Dl	50_S2	50_Ds2	50_H2	50_Dl2	Truck (1)	Truck (2)
1	1342.26	13456.8	27098.3	32299.9	51967.8	58107.9	65430.7	66392.4	82616.1	93645.2	126209	124850	136965	183367	252669	267161	205757	245825	393481	390853	198606	238674	381222	378594	305475	122833
2	63.0918	15.3798	12022.5	16932.3	38.5246	12369.2	4921.28	17289	77.0492	32560.2	23334.4	58859.1	192.322	84582.4	60608.3	153897	384.644	113910	81749.1	207409	384.644	113910	81749.1	207409	276730	122833
3	78.9395	15.3798	11456.2	16932.3	38.5246	11479.4	4921.28	17289	77.0492	35601.8	23334.4	55817.5	192.322	93480.7	60608.3	144998	384.644	126044	81749.1	195275	384.644	126044	81749.1	195275	267831	122833
4	63.0918	15.3798	12022.5	16366.1	38.5246	12369.2	4921.28	16399.2	77.0492	32560.2	23334.4	58859.1	192.322	84582.4	60608.3	153897	384.644	113910	81749.1	207409	384.644	113910	81749.1	207409	276730	122833
5	63.0918	15.3798	11456.2	18301.8	38.5246	11479.4	6176.52	19730.7	77.0492	32560.2	26829.7	56271.3	192.322	84582.4	70047.2	145539	384.644	113910	94520.3	195912	384.644	113910	94520.3	195912	268372	122833
6	78.9395	15.3798	13343.8	16932.3	38.5246	14445.5	4921.28	17289	77.0492	35601.8	23334.4	65956.2	192.322	93480.7	60608.3	174659	384.644	126044	81749.1	235722	384.644	126044	81749.1	235722	297493	122833
7	63.0918	316.432	11504.5	16932.3	984.514	11844.8	5467.38	17289	1169.25	32560.2	24426.6	55817.5	3171.04	84582.4	63587	144998	4058.4	113910	85422.8	195275	4058.4	113910	85422.8	195275	267831	122833
8	63.0918	15.3798	12022.5	16366.1	38.5246	12369.2	4921.28	16399.2	573.61	33014	23334.4	58859.1	783.969	85123	60608.3	153897	1081.94	114547	81749.1	207409	1081.94	114547	81749.1	207409	276730	122833
9	78.9395	15.3798	11456.2	18253.6	38.5246	11479.4	4921.28	19365.3	77.0492	35601.8	26376	55817.5	192.322	93480.7	69506.6	144998	384.644	126044	93883.2	195275	384.644	126044	93883.2	195275	267831	122833
10	63.0918	15.3798	12022.5	16980.6	38.5246	12369.2	6176.52	17654.4	77.0492	42698.9	23788.1	59312.9	192.322	114243	61148.9	154437	384.644	154357	82386.2	208046	384.644	154357	82386.2	208046	277270	122833
YEARLY WATER PRODUCTION [m3/year]
	m3/y	m3/y	m3/y	m3/y	m3/y	m3/y	m3/y	m3/y	m3/y	m3/y	m3/y	m3/y	m3/y	m3/y	m3/y	m3/y	m3/y	m3/y	m3/y	m3/y	m3/y	m3/y	m3/y	m3/y	m3/y	m3/y
	HP	2_S	2_Ds	2_Dl	5_S	5_Ds	5_H	5_Dl	10_S	10_Ds	10_H	10_Dl	25_S	25_Ds	25_H	25_Dl	50_S	50_Ds	50_H	50_Dl	50_S2	50_Ds2	50_H2	50_Dl2	Truck (1)	Truck (2)
1	2737.5	5110	5110	7300	12775	12775	18250	18250	25550	25550	43800	43800	63875	63875	109500	109500	127750	127750	219000	219000	127750	127750	219000	219000	109500	0
2	2737.5	5110	5110	7300	12775	12775	18250	18250	25550	25550	43800	43800	63875	63875	109500	109500	127750	127750	219000	219000	127750	127750	219000	219000	109500	0
3	2737.5	5110	5110	7300	12775	12775	18250	18250	25550	25550	43800	43800	63875	63875	109500	109500	127750	127750	219000	219000	127750	127750	219000	219000	109500	0
4	2737.5	5110	5110	7300	12775	12775	18250	18250	25550	25550	43800	43800	63875	63875	109500	109500	127750	127750	219000	219000	127750	127750	219000	219000	109500	0
5	2737.5	5110	5110	7300	12775	12775	18250	18250	25550	25550	43800	43800	63875	63875	109500	109500	127750	127750	219000	219000	127750	127750	219000	219000	109500	0
6	2737.5	5110	5110	7300	12775	12775	18250	18250	25550	25550	43800	43800	63875	63875	109500	109500	127750	127750	219000	219000	127750	127750	219000	219000	109500	0
7	2737.5	5110	5110	7300	12775	12775	18250	18250	25550	25550	43800	43800	63875	63875	109500	109500	127750	127750	219000	219000	127750	127750	219000	219000	109500	0
8	2737.5	5110	5110	7300	12775	12775	18250	18250	25550	25550	43800	43800	63875	63875	109500	109500	127750	127750	219000	219000	127750	127750	219000	219000	109500	0
9	2737.5	5110	5110	7300	12775	12775	18250	18250	25550	25550	43800	43800	63875	63875	109500	109500	127750	127750	219000	219000	127750	127750	219000	219000	109500	0
10	2737.5	5110	5110	7300	12775	12775	18250	18250	25550	25550	43800	43800	63875	63875	109500	109500	127750	127750	219000	219000	127750	127750	219000	219000	109500	0
CUMULATIVE WATER PRODUCTION [m3]
	m3	m3	m3	m3	m3	m3	m3	m3	m3	m3	m3	m3	m3	m3	m3	m3	m3	m3	m3	m3	m3	m3	m3	m3	m3	m3
	HP	2_S	2_Ds	2_Dl	5_S	5_Ds	5_H	5_Dl	10_S	10_Ds	10_H	10_Dl	25_S	25_Ds	25_H	25_Dl	50_S	50_Ds	50_H	50_Dl	50_S2	50_Ds2	50_H2	50_Dl2	Truck (1)	Truck (2)
1	2737.5	5110	5110	7300	12775	12775	18250	18250	25550	25550	43800	43800	63875	63875	109500	109500	127750	127750	219000	219000	127750	127750	219000	219000	109500	0
2	5475	10220	10220	14600	25550	25550	36500	36500	51100	51100	87600	87600	127750	127750	219000	219000	255500	255500	438000	438000	255500	255500	438000	438000	219000	0
3	8212.5	15330	15330	21900	38325	38325	54750	54750	76650	76650	131400	131400	191625	191625	328500	328500	383250	383250	657000	657000	383250	383250	657000	657000	328500	0
4	10950	20440	20440	29200	51100	51100	73000	73000	102200	102200	175200	175200	255500	255500	438000	438000	511000	511000	876000	876000	511000	511000	876000	876000	438000	0
5	13687.5	25550	25550	36500	63875	63875	91250	91250	127750	127750	219000	219000	319375	319375	547500	547500	638750	638750	1095000	1095000	638750	638750	1095000	1095000	547500	0
6	16425	30660	30660	43800	76650	76650	109500	109500	153300	153300	262800	262800	383250	383250	657000	657000	766500	766500	1314000	1314000	766500	766500	1314000	1314000	657000	0
7	19162.5	35770	35770	51100	89425	89425	127750	127750	178850	178850	306600	306600	447125	447125	766500	766500	894250	894250	1533000	1533000	894250	894250	1533000	1533000	766500	0
8	21900	40880	40880	58400	102200	102200	146000	146000	204400	204400	350400	350400	511000	511000	876000	876000	1022000	1022000	1752000	1752000	1022000	1022000	1752000	1752000	876000	0
9	24637.5	45990	45990	65700	114975	114975	164250	164250	229950	229950	394200	394200	574875	574875	985500	985500	1149750	1149750	1971000	1971000	1149750	1149750	1971000	1971000	985500	0
10	27375	51100	51100	73000	127750	127750	182500	182500	255500	255500	438000	438000	638750	638750	1095000	1095000	1277500	1277500	2190000	2190000	1277500	1277500	2190000	2190000	1095000	0
CUMULATIVE kg CO2-eq [kg CO2-eq]
	kg CO2-eq	kg CO2-eq	kg CO2-eq	kg CO2-eq	kg CO2-eq	kg CO2-eq	kg CO2-eq	kg CO2-eq	kg CO2-eq	kg CO2-eq	kg CO2-eq	kg CO2-eq	kg CO2-eq	kg CO2-eq	kg CO2-eq	kg CO2-eq	kg CO2-eq	kg CO2-eq	kg CO2-eq	kg CO2-eq	kg CO2-eq	kg CO2-eq	kg CO2-eq	kg CO2-eq	kg CO2-eq	kg CO2-eq
	HP	2_S	2_Ds	2_Dl	5_S	5_Ds	5_H	5_Dl	10_S	10_Ds	10_H	10_Dl	25_S	25_Ds	25_H	25_Dl	50_S	50_Ds	50_H	50_Dl	50_S2	50_Ds2	50_H2	50_Dl2	Truck (1)	Truck (2)
1	1342.26	13456.8	27098.3	32299.9	51967.8	58107.9	65430.7	66392.4	82616.1	93645.2	126209	124850	136965	183367	252669	267161	205757	245825	393481	390853	198606	238674	381222	378594	305475	122833
2	1405.35	13472.1	39120.8	49232.2	52006.4	70477.2	70352	83681.4	82693.2	126205	149544	183709	137158	267950	313278	421058	206142	359736	475230	598262	198991	352585	462971	586003	582205	245666
3	1484.29	13487.5	50577	66164.5	52044.9	81956.5	75273.3	100970	82770.2	161807	172878	239527	137350	361430	373886	566056	206526	485780	556979	793536	199375	478629	544720	781278	850036	368499
4	1547.38	13502.9	62599.5	82530.5	52083.4	94325.7	80194.6	117370	82847.3	194367	196212	298386	137542	446013	434494	719953	206911	599690	638728	1.00095e+06	199760	592539	626469	988686	1.12677e+06	491333
5	1610.47	13518.3	74055.8	100832	52121.9	105805	86371.1	137100	82924.3	226928	223042	354657	137735	530595	504542	865492	207296	713600	733248	1.19686e+06	200145	706449	720990	1.1846e+06	1.39514e+06	614166
6	1689.41	13533.7	87399.5	117765	52160.5	120251	91292.4	154389	83001.4	262530	246376	420614	137927	624076	565150	1.04015e+06	207680	839645	814998	1.43258e+06	200529	832494	802739	1.42032e+06	1.69263e+06	736999
7	1752.5	13850.1	98904	134697	53145	132095	96759.7	171678	84170.6	295090	270803	476431	141098	708658	628737	1.18515e+06	211739	953555	900420	1.62785e+06	204588	946404	888162	1.61559e+06	1.96046e+06	859832
8	1815.59	13865.5	110927	151063	53183.5	144465	101681	188077	84744.3	328104	294137	535290	141882	793781	689345	1.33905e+06	212821	1.0681e+06	982169	1.83526e+06	205670	1.06095e+06	969911	1.823e+06	2.23719e+06	982665
9	1894.53	13880.9	122383	169317	53222	155944	106602	207443	84821.3	363706	320513	591108	142074	887262	758852	1.48404e+06	213205	1.19415e+06	1.07605e+06	2.03054e+06	206054	1.187e+06	1.06379e+06	2.01828e+06	2.50502e+06	1.1055e+06
10	1957.63	13896.2	134405	186297	53260.5	168313	112779	225097	84898.3	406404	344301	650421	142267	1.00151e+06	820001	1.63848e+06	213590	1.3485e+06	1.15844e+06	2.23858e+06	206439	1.34135e+06	1.14618e+06	2.22632e+06	2.78229e+06	1.22833e+06
CUMULATIVE kg CO2-eq PER M3 OF WATER [kg CO2-eq/m3]
	kg CO2-eq/m3	kg CO2-eq/m3	kg CO2-eq/m3	kg CO2-eq/m3	kg CO2-eq/m3	kg CO2-eq/m3	kg CO2-eq/m3	kg CO2-eq/m3	kg CO2-eq/m3	kg CO2-eq/m3	kg CO2-eq/m3	kg CO2-eq/m3	kg CO2-eq/m3	kg CO2-eq/m3	kg CO2-eq/m3	kg CO2-eq/m3	kg CO2-eq/m3	kg CO2-eq/m3	kg CO2-eq/m3	kg CO2-eq/m3	kg CO2-eq/m3	kg CO2-eq/m3	kg CO2-eq/m3	kg CO2-eq/m3	kg CO2-eq/m3	kg CO2-eq/m3
	HP	2_S	2_Ds	2_Dl	5_S	5_Ds	5_H	5_Dl	10_S	10_Ds	10_H	10_Dl	25_S	25_Ds	25_H	25_Dl	50_S	50_Ds	50_H	50_Dl	50_S2	50_Ds2	50_H2	50_Dl2	Truck (1)	Truck (2)
1	0.490322	2.63342	5.30299	4.42464	4.06793	4.54857	3.58524	3.63794	3.23351	3.66517	2.88149	2.85046	2.14427	2.87072	2.30748	2.43983	1.61062	1.92427	1.79672	1.78472	1.55465	1.86829	1.74074	1.72874	2.78973	#DIV/0!
2	0.256685	1.31821	3.82787	3.37207	2.03547	2.7584	1.92745	2.29264	1.61826	2.46977	1.70712	2.09714	1.07364	2.09745	1.43049	1.92264	0.806816	1.40797	1.085	1.36589	0.778828	1.37998	1.05701	1.33791	2.65847	#DIV/0!
3	0.180735	0.879812	3.29922	3.02121	1.35799	2.13846	1.37485	1.84421	1.07985	2.11099	1.31566	1.82288	0.716765	1.88613	1.13816	1.72315	0.538881	1.26753	0.847761	1.20782	0.520223	1.24887	0.829102	1.18916	2.58763	#DIV/0!
4	0.141313	0.660612	3.0626	2.82639	1.01924	1.84591	1.09856	1.6078	0.810639	1.90183	1.11993	1.70312	0.538327	1.74565	0.991996	1.64373	0.404914	1.17356	0.729142	1.14263	0.39092	1.15957	0.715148	1.12864	2.57253	#DIV/0!
5	0.11766	0.529091	2.89846	2.76253	0.815999	1.65644	0.946532	1.50247	0.649114	1.77634	1.01846	1.61944	0.431263	1.66135	0.921537	1.58081	0.324533	1.11718	0.669633	1.09302	0.313338	1.10599	0.658438	1.08182	2.5482	#DIV/0!
6	0.102856	0.441411	2.8506	2.68869	0.680502	1.56883	0.83372	1.40995	0.541431	1.71252	0.937505	1.60051	0.359888	1.62838	0.860198	1.58318	0.270946	1.09543	0.620242	1.09024	0.261617	1.0861	0.610912	1.08091	2.5763	#DIV/0!
7	0.0914548	0.387199	2.765	2.63595	0.594297	1.47716	0.757415	1.34386	0.470621	1.64993	0.883245	1.55392	0.315568	1.58492	0.82027	1.54618	0.236778	1.06632	0.587358	1.06187	0.228781	1.05832	0.579362	1.05388	2.55768	#DIV/0!
8	0.0829039	0.339175	2.71347	2.5867	0.520387	1.41355	0.696445	1.2882	0.4146	1.6052	0.839433	1.52765	0.277656	1.55339	0.786924	1.52859	0.208239	1.04511	0.560599	1.04752	0.201242	1.03811	0.553602	1.04053	2.55387	#DIV/0!
9	0.0768964	0.301823	2.66107	2.57712	0.462901	1.35633	0.649025	1.26297	0.368868	1.58167	0.813073	1.49951	0.24714	1.5434	0.770017	1.50588	0.185436	1.03861	0.545942	1.03021	0.179217	1.03239	0.539723	1.02399	2.54188	#DIV/0!
10	0.0715115	0.271942	2.63024	2.55202	0.416912	1.31752	0.617966	1.23341	0.332283	1.59062	0.786076	1.48498	0.222727	1.56791	0.748859	1.49633	0.167194	1.05558	0.528968	1.02218	0.161596	1.04998	0.52337	1.01659	2.54091	#DIV/0!
	kg CO2-eq/m3	kg CO2-eq/m3	kg CO2-eq/m3	kg CO2-eq/m3	kg CO2-eq/m3	kg CO2-eq/m3	kg CO2-eq/m3	kg CO2-eq/m3	kg CO2-eq/m3	kg CO2-eq/m3	kg CO2-eq/m3	kg CO2-eq/m3	kg CO2-eq/m3	kg CO2-eq/m3	kg CO2-eq/m3	kg CO2-eq/m3	kg CO2-eq/m3	kg CO2-eq/m3	kg CO2-eq/m3	kg CO2-eq/m3	kg CO2-eq/m3	kg CO2-eq/m3	kg CO2-eq/m3	kg CO2-eq/m3	kg CO2-eq/m3	kg CO2-eq/m3
	HP	2_S	2_Ds	2_Dl	5_S	5_Ds	5_H	5_Dl	10_S	10_Ds	10_H	10_Dl	25_S	25_Ds	25_H	25_Dl	50_S	50_Ds	50_H	50_Dl	50_S2	50_Ds2	50_H2	50_Dl2	Truck (1)	Truck (2)
1	0.490322	2.63342	5.30299	4.42464	4.06793	4.54857	3.58524	3.63794	3.23351	3.66517	2.88149	2.85046	2.14427	2.87072	2.30748	2.43983	1.61062	1.92427	1.79672	1.78472	1.55465	1.86829	1.74074	1.72874	2.78973	#DIV/0!
2	0.256685	1.31821	3.82787	3.37207	2.03547	2.7584	1.92745	2.29264	1.61826	2.46977	1.70712	2.09714	1.07364	2.09745	1.43049	1.92264	0.806816	1.40797	1.085	1.36589	0.778828	1.37998	1.05701	1.33791	2.65847	#DIV/0!
3	0.180735	0.879812	3.29922	3.02121	1.35799	2.13846	1.37485	1.84421	1.07985	2.11099	1.31566	1.82288	0.716765	1.88613	1.13816	1.72315	0.538881	1.26753	0.847761	1.20782	0.520223	1.24887	0.829102	1.18916	2.58763	#DIV/0!
4	0.141313	0.660612	3.0626	2.82639	1.01924	1.84591	1.09856	1.6078	0.810639	1.90183	1.11993	1.70312	0.538327	1.74565	0.991996	1.64373	0.404914	1.17356	0.729142	1.14263	0.39092	1.15957	0.715148	1.12864	2.57253	#DIV/0!
5	0.11766	0.529091	2.89846	2.76253	0.815999	1.65644	0.946532	1.50247	0.649114	1.77634	1.01846	1.61944	0.431263	1.66135	0.921537	1.58081	0.324533	1.11718	0.669633	1.09302	0.313338	1.10599	0.658438	1.08182	2.5482	#DIV/0!
6	0.102856	0.441411	2.8506	2.68869	0.680502	1.56883	0.83372	1.40995	0.541431	1.71252	0.937505	1.60051	0.359888	1.62838	0.860198	1.58318	0.270946	1.09543	0.620242	1.09024	0.261617	1.0861	0.610912	1.08091	2.5763	#DIV/0!
7	0.0914548	0.387199	2.765	2.63595	0.594297	1.47716	0.757415	1.34386	0.470621	1.64993	0.883245	1.55392	0.315568	1.58492	0.82027	1.54618	0.236778	1.06632	0.587358	1.06187	0.228781	1.05832	0.579362	1.05388	2.55768	#DIV/0!
8	0.0829039	0.339175	2.71347	2.5867	0.520387	1.41355	0.696445	1.2882	0.4146	1.6052	0.839433	1.52765	0.277656	1.55339	0.786924	1.52859	0.208239	1.04511	0.560599	1.04752	0.201242	1.03811	0.553602	1.04053	2.55387	#DIV/0!
9	0.0768964	0.301823	2.66107	2.57712	0.462901	1.35633	0.649025	1.26297	0.368868	1.58167	0.813073	1.49951	0.24714	1.5434	0.770017	1.50588	0.185436	1.03861	0.545942	1.03021	0.179217	1.03239	0.539723	1.02399	2.54188	#DIV/0!
10	0.0715115	0.271942	2.63024	2.55202	0.416912	1.31752	0.617966	1.23341	0.332283	1.59062	0.786076	1.48498	0.222727	1.56791	0.748859	1.49633	0.167194	1.05558	0.528968	1.02218	0.161596	1.04998	0.52337	1.01659	2.54091	#DIV/0!
[truncated: 30 more columns]
